# Supplementary material for: Towards conserving natural diversity: A biotic inventory by observations, specimens, DNA barcoding and high-throughput sequencing methods
Source: Biodivers Data J. 2020 Feb 27;8:e50124. doi: 10.3897/BDJ.8.e50124 (PMC7058680; doi:10.3897/BDJ.8.e50124)
Supplement: Supplementary material 9 — Analysis dataset [file bdj-08-e50124-s009.csv]

USE_LICENSE_URL	GUID	SCIENTIFIC_NAME	PHYLORDER	FAMILY	PHYLCLASS	OTHERCATALOGNUMBERS	RELATEDCATALOGEDITEMS	COLLECTORS	COORDINATEUNCERTAINTYINMETERS	COUNTRY	STATE_PROV	SPEC_LOCALITY	COLLECTING_METHOD	VERBATIM_DATE	BEGAN_DATE	ENDED_DATE	PARTS	DEC_LAT	DEC_LONG	COLLECTING_EVENT_ID	COLLECTING_SOURCE	PHYLUM	GENUS	LOCALITY_REMARKS	KINGDOM	SPECIES	ACCN_NUMBER	point_id
http://creativecommons.org/publicdomain/zero/1.0/	KNWR:Ento:10976	Arthropoda				NCBI Biosample=SAMN08273487	(same lot as) UAMObs:Ento http://arctos.database.museum/guid/UAMObs:Ento:240169; (same lot as) UAMObs:Ento http://arctos.database.museum/guid/UAMObs:Ento:240170; (same lot as) UAMObs:Ento http://arctos.database.museum/guid/UAMObs:Ento:240171; (same lot as) UAMObs:Ento http://arctos.database.museum/guid/UAMObs:Ento:240172; (same lot as) UAMObs:Ento http://arctos.database.museum/guid/UAMObs:Ento:24…	Mariah McInnis, Matt Bowser	12	United States	Alaska	Soldotna, stream 1.7km south-southeast of Headquarters Lake, Slikok watershed project site SK24, east half of plot		7/29/2016	2016-07-29	2016-07-29	whole organism	60.44056	-151.05118	10977490	wild caught	Arthropoda			Animalia		KNWR-2016.02-Slikok-Ento	SK24
http://creativecommons.org/publicdomain/zero/1.0/	KNWR:Ento:10985	Arthropoda				NCBI Biosample=SAMN08273530	(same lot as) UAMObs:Ento http://arctos.database.museum/guid/UAMObs:Ento:240207; (same lot as) UAMObs:Ento http://arctos.database.museum/guid/UAMObs:Ento:240208; (same lot as) UAMObs:Ento http://arctos.database.museum/guid/UAMObs:Ento:240209; (same lot as) UAMObs:Ento http://arctos.database.museum/guid/UAMObs:Ento:240210; (same lot as) UAMObs:Ento http://arctos.database.museum/guid/UAMObs:Ento:24…	Mariah McInnis, Matt Bowser	12	United States	Alaska	Soldotna, Ski Hill Road, ski trails between new visitor center and old septic leach field, Slikok watershed project site MG06, east half of plot		7/18/2016	2016-07-18	2016-07-18	whole organism	60.46348	-151.0765	10977499	wild caught	Arthropoda			Animalia		KNWR-2016.02-Slikok-Ento	MG06
http://creativecommons.org/publicdomain/zero/1.0/	KNWR:Ento:10992	Arthropoda				NCBI Biosample=SAMN08273553		Matt Bowser	12	United States	Alaska	Soldotna, muskeg 0.6km northeast of Headquarters Lake, Slikok watershed project site MG09, west half of plot		7/19/2016	2016-07-19	2016-07-19	whole organism	60.46289	-151.04916	10977506	wild caught	Arthropoda			Animalia		KNWR-2016.02-Slikok-Ento	MG09
http://creativecommons.org/publicdomain/zero/1.0/	KNWR:Ento:10993	Arthropoda				NCBI Biosample=SAMN08273531	(same lot as) UAMObs:Ento http://arctos.database.museum/guid/UAMObs:Ento:240517; (same lot as) UAMObs:Ento http://arctos.database.museum/guid/UAMObs:Ento:240518; (same lot as) UAMObs:Ento http://arctos.database.museum/guid/UAMObs:Ento:240519; (same lot as) UAMObs:Ento http://arctos.database.museum/guid/UAMObs:Ento:240520; (same lot as) UAMObs:Ento http://arctos.database.museum/guid/UAMObs:Ento:24…	Matt Bowser	12	United States	Alaska	Soldotna, 40m east of Sterling Highway 480m northeast of intersection with south end of Ski Hill Road, Slikok watershed project site MG10, east half of plot		8/10/2016	2016-08-10	2016-08-10	whole organism	60.45941	-151.09513	10977507	wild caught	Arthropoda			Animalia		KNWR-2016.02-Slikok-Ento	MG10
http://creativecommons.org/publicdomain/zero/1.0/	KNWR:Ento:10994	Arthropoda				NCBI Biosample=SAMN08273470		Matt Bowser	12	United States	Alaska	Soldotna, 40m east of Sterling Highway 480m northeast of intersection with south end of Ski Hill Road, Slikok watershed project site MG10, west half of plot		8/10/2016	2016-08-10	2016-08-10	whole organism	60.45941	-151.09513	10977508	wild caught	Arthropoda			Animalia		KNWR-2016.02-Slikok-Ento	MG10
http://creativecommons.org/publicdomain/zero/1.0/	KNWR:Ento:10922	Arthropoda				NCBI Biosample=SAMN08273493	(same lot as) UAMObs:Ento http://arctos.database.museum/guid/UAMObs:Ento:239333; (same lot as) UAMObs:Ento http://arctos.database.museum/guid/UAMObs:Ento:239334; (same lot as) UAMObs:Ento http://arctos.database.museum/guid/UAMObs:Ento:239335; (same lot as) UAMObs:Ento http://arctos.database.museum/guid/UAMObs:Ento:239336; (same lot as) UAMObs:Ento http://arctos.database.museum/guid/UAMObs:Ento:23…	Joel Stone, Dawn Magness	12	United States	Alaska	Soldotna, 210m east-southeast of intersection of Sterling Highway and south end of Ski Hill Road, Slikok watershed project site MG16, east half of plot		6/17/2016	2016-06-17	2016-06-17	whole organism	60.45494	-151.09552	10970715	wild caught	Arthropoda			Animalia		KNWR-2016.02-Slikok-Ento	MG16
http://creativecommons.org/publicdomain/zero/1.0/	KNWR:Ento:10873	Arthropoda				NCBI Biosample=SAMN08273416	(same lot as) UAMObs:Ento http://arctos.database.museum/guid/UAMObs:Ento:238691; (same lot as) UAMObs:Ento http://arctos.database.museum/guid/UAMObs:Ento:238692; (same lot as) UAMObs:Ento http://arctos.database.museum/guid/UAMObs:Ento:238693; (same lot as) UAMObs:Ento http://arctos.database.museum/guid/UAMObs:Ento:238694; (same lot as) UAMObs:Ento http://arctos.database.museum/guid/UAMObs:Ento:23…	Matt Bowser, Dawn Magness	12	United States	Alaska	Soldotna, forest 1.3km southeast of Headquarters Lake, Slikok watershed project site MG33, east half of plot		6/16/2016	2016-06-16	2016-06-16	whole organism	60.44502	-151.05078	10970666	wild caught	Arthropoda			Animalia		KNWR-2016.02-Slikok-Ento	MG33
http://creativecommons.org/publicdomain/zero/1.0/	KNWR:Ento:10879	Arthropoda				NCBI Biosample=SAMN08273453	(same lot as) UAMObs:Ento http://arctos.database.museum/guid/UAMObs:Ento:238732; (same lot as) UAMObs:Ento http://arctos.database.museum/guid/UAMObs:Ento:238733; (same lot as) UAMObs:Ento http://arctos.database.museum/guid/UAMObs:Ento:238734; (same lot as) UAMObs:Ento http://arctos.database.museum/guid/UAMObs:Ento:238735; (same lot as) UAMObs:Ento http://arctos.database.museum/guid/UAMObs:Ento:23…	Matt Bowser, Todd Eskelin	12	United States	Alaska	Soldotna, muskeg 600m south of Nordic Lake, Slikok watershed project site MG37, east half of plot		6/15/2016	2016-06-15	2016-06-15	whole organism	60.44115	-151.07851	10970672	wild caught	Arthropoda			Animalia		KNWR-2016.02-Slikok-Ento	MG37
http://creativecommons.org/publicdomain/zero/1.0/	KNWR:Ento:10882	Arthropoda				NCBI Biosample=SAMN08273497		Matt Bowser, Todd Eskelin	12	United States	Alaska	Soldotna, forest 1.5km south of Headquarters Lake, Slikok watershed project site MG39, west half of plot		6/15/2016	2016-06-15	2016-06-15	whole organism	60.44076	-151.06029	10970675	wild caught	Arthropoda			Animalia		KNWR-2016.02-Slikok-Ento	MG39
http://creativecommons.org/publicdomain/zero/1.0/	KNWR:Ento:10883	Arthropoda				NCBI Biosample=SAMN08273517	(same lot as) UAMObs:Ento http://arctos.database.museum/guid/UAMObs:Ento:238912; (same lot as) UAMObs:Ento http://arctos.database.museum/guid/UAMObs:Ento:238913; (same lot as) UAMObs:Ento http://arctos.database.museum/guid/UAMObs:Ento:238914; (same lot as) UAMObs:Ento http://arctos.database.museum/guid/UAMObs:Ento:238915; (same lot as) UAMObs:Ento http://arctos.database.museum/guid/UAMObs:Ento:23…	Matt Bowser, Todd Eskelin	12	United States	Alaska	Soldotna, forest 2km southeast of Headquarters Lake, Slikok watershed project site MG41, east half of plot		6/17/2016	2016-06-17	2016-06-17	whole organism	60.44036	-151.04208	10970676	wild caught	Arthropoda			Animalia		KNWR-2016.02-Slikok-Ento	MG41
http://creativecommons.org/publicdomain/zero/1.0/	KNWR:Ento:10891	Arthropoda				NCBI Biosample=SAMN08273417	(same lot as) UAMObs:Ento http://arctos.database.museum/guid/UAMObs:Ento:238859; (same lot as) UAMObs:Ento http://arctos.database.museum/guid/UAMObs:Ento:238860; (same lot as) UAMObs:Ento http://arctos.database.museum/guid/UAMObs:Ento:238861; (same lot as) UAMObs:Ento http://arctos.database.museum/guid/UAMObs:Ento:238862; (same lot as) UAMObs:Ento http://arctos.database.museum/guid/UAMObs:Ento:23…	Matt Bowser, Todd Eskelin	12	United States	Alaska	Soldotna, forest 610m southweast of Nordic Lake, Slikok watershed project site SK22, east half of plot		6/15/2016	2016-06-15	2016-06-15	whole organism	60.44135	-151.08761	10970684	wild caught	Arthropoda			Animalia		KNWR-2016.02-Slikok-Ento	SK22
http://creativecommons.org/publicdomain/zero/1.0/	KNWR:Ento:10895	Arthropoda				NCBI Biosample=SAMN08273479	(same lot as) UAMObs:Ento http://arctos.database.museum/guid/UAMObs:Ento:239028; (same lot as) UAMObs:Ento http://arctos.database.museum/guid/UAMObs:Ento:239029; (same lot as) UAMObs:Ento http://arctos.database.museum/guid/UAMObs:Ento:239030; (same lot as) UAMObs:Ento http://arctos.database.museum/guid/UAMObs:Ento:239031; (same lot as) UAMObs:Ento http://arctos.database.museum/guid/UAMObs:Ento:23…	Matt Bowser, Todd Eskelin	12	United States	Alaska	Soldotna, stream 1.7km south-southeast of Headquarters Lake, Slikok watershed project site SK24, east half of plot		6/15/2016	2016-06-15	2016-06-15	whole organism	60.44056	-151.05118	10970688	wild caught	Arthropoda			Animalia		KNWR-2016.02-Slikok-Ento	SK24
http://creativecommons.org/publicdomain/zero/1.0/	KNWR:Ento:10897	Arthropoda				NCBI Biosample=SAMN08273457	(same lot as) UAMObs:Ento http://arctos.database.museum/guid/UAMObs:Ento:238998; (same lot as) UAMObs:Ento http://arctos.database.museum/guid/UAMObs:Ento:238999; (same lot as) UAMObs:Ento http://arctos.database.museum/guid/UAMObs:Ento:239000; (same lot as) UAMObs:Ento http://arctos.database.museum/guid/UAMObs:Ento:239001; (same lot as) UAMObs:Ento http://arctos.database.museum/guid/UAMObs:Ento:23…	Matt Bowser, Dawn Magness	12	United States	Alaska	Soldotna, Ski Hill Road, off of Centennial Trail 480m northeast of Kenai National Wildlife Refuge headquarters building, Slikok watershed project site SK03, east half of plot		6/14/2016	2016-06-14	2016-06-14	whole organism	60.46775	-151.06698	10970690	wild caught	Arthropoda			Animalia		KNWR-2016.02-Slikok-Ento	SK03
http://creativecommons.org/publicdomain/zero/1.0/	KNWR:Ento:10904	Arthropoda				NCBI Biosample=SAMN08273481	(same lot as) UAMObs:Ento http://arctos.database.museum/guid/UAMObs:Ento:239130; (same lot as) UAMObs:Ento http://arctos.database.museum/guid/UAMObs:Ento:239251; (same lot as) UAMObs:Ento http://arctos.database.museum/guid/UAMObs:Ento:239252; (same lot as) UAMObs:Ento http://arctos.database.museum/guid/UAMObs:Ento:239253; (same lot as) UAMObs:Ento http://arctos.database.museum/guid/UAMObs:Ento:23…	Rebekah Brassfield, Todd Eskelin	12	United States	Alaska	Soldotna, 100m west of Sterling Highway and 1.3km from intersection with Funny River Road, Slikok watershed project site MG04, east half of plot		6/14/2016	2016-06-14	2016-06-14	whole organism	60.46387	-151.09473	10970697	wild caught	Arthropoda			Animalia		KNWR-2016.02-Slikok-Ento	MG04
http://creativecommons.org/publicdomain/zero/1.0/	KNWR:Ento:10914	Arthropoda				NCBI Biosample=SAMN08273566	(same lot as) UAMObs:Ento http://arctos.database.museum/guid/UAMObs:Ento:239376; (same lot as) UAMObs:Ento http://arctos.database.museum/guid/UAMObs:Ento:239377; (same lot as) UAMObs:Ento http://arctos.database.museum/guid/UAMObs:Ento:239378; (same lot as) UAMObs:Ento http://arctos.database.museum/guid/UAMObs:Ento:239379; (same lot as) UAMObs:Ento http://arctos.database.museum/guid/UAMObs:Ento:23…	Matt Bowser, Dawn Magness	12	United States	Alaska	Soldotna, muskeg 0.6km northeast of Headquarters Lake, Slikok watershed project site MG09, east half of plot		6/14/2016	2016-06-14	2016-06-14	whole organism	60.46289	-151.04916	10970707	wild caught	Arthropoda			Animalia		KNWR-2016.02-Slikok-Ento	MG09
http://creativecommons.org/publicdomain/zero/1.0/	KNWR:Ento:10915	Arthropoda				NCBI Biosample=SAMN08273483		Matt Bowser, Dawn Magness	12	United States	Alaska	Soldotna, muskeg 0.6km northeast of Headquarters Lake, Slikok watershed project site MG09, west half of plot		6/14/2016	2016-06-14	2016-06-14	whole organism	60.46289	-151.04916	10970708	wild caught	Arthropoda			Animalia		KNWR-2016.02-Slikok-Ento	MG09
http://creativecommons.org/publicdomain/zero/1.0/	KNWR:Ento:10918	Arthropoda				NCBI Biosample=SAMN08273540	(same lot as) UAMObs:Ento http://arctos.database.museum/guid/UAMObs:Ento:239321; (same lot as) UAMObs:Ento http://arctos.database.museum/guid/UAMObs:Ento:239322; (same lot as) UAMObs:Ento http://arctos.database.museum/guid/UAMObs:Ento:239323; (same lot as) UAMObs:Ento http://arctos.database.museum/guid/UAMObs:Ento:239324; (same lot as) UAMObs:Ento http://arctos.database.museum/guid/UAMObs:Ento:23…	Joel Stone, Dawn Magness	12	United States	Alaska	Soldotna, in wetland 400m south-southwest of floatplane dock on Headquarters Lake, Slikok watershed project site MG12, east half of plot		6/17/2016	2016-06-17	2016-06-17	whole organism	60.45902	-151.0769	10970711	wild caught	Arthropoda			Animalia		KNWR-2016.02-Slikok-Ento	MG12
http://creativecommons.org/publicdomain/zero/1.0/	KNWR:Ento:11060	Enchytraeidae sp. BOLD:ADE9617	Enchytraeida	Enchytraeidae	Clitellata	BoLD barcode ID=MOBIL2163-16		Mariah McInnis, Matt Bowser	5	United States	Alaska	Soldotna, forest 880m southeast of Nordic Lake, vicinity of Slikok watershed project site SK23		8/3/2016	2016-08-03	2016-08-03	whole organism	60.44094	-151.06929	11024687	wild caught	Annelida			Animalia	Enchytraeidae sp. BOLD:ADE9617	KNWR-2016.02-Slikok-Ento	SK23
http://creativecommons.org/publicdomain/zero/1.0/	KNWR:Ento:11042	Enchytraeidae sp. BOLD:ADE9617	Enchytraeida	Enchytraeidae	Clitellata	BoLD barcode ID=MOBIL2157-16		Mariah McInnis, Joel Stone, Matt Bowser	5	United States	Alaska	Soldotna, forest 1.3km southeast of Headquarters Lake, vicinity of Slikok watershed project site MG33		7/21/2016	2016-07-21	2016-07-21	whole organism	60.44498	-151.05074	11024679	wild caught	Annelida			Animalia	Enchytraeidae sp. BOLD:ADE9617	KNWR-2016.02-Slikok-Ento	MG33
http://creativecommons.org/publicdomain/zero/1.0/	KNWR:Ento:11044	Dendrobaena octaedra	Opisthopora	Lumbricidae	Oligochaeta			Mariah McInnis, Joel Stone, Matt Bowser	5	United States	Alaska	Soldotna, forest 2km southeast of Headquarters Lake, vicinity of Slikok watershed project site MG41		7/21/2016	2016-07-21	2016-07-21	whole organism	60.4404	-151.04222	11024681	wild caught	Annelida	Dendrobaena		Animalia	Dendrobaena octaedra	KNWR-2016.02-Slikok-Ento	MG41
http://creativecommons.org/publicdomain/zero/1.0/	KNWR:Ento:11052	Enchytraeidae sp. MOBIL2369-17	Enchytraeida	Enchytraeidae	Clitellata	BoLD barcode ID=MOBIL2369-17		Mariah McInnis, Joel Stone, Matt Bowser	5	United States	Alaska	Soldotna, forest 1.3km southeast of Headquarters Lake, vicinity of Slikok watershed project site MG33		7/21/2016	2016-07-21	2016-07-21	whole organism	60.44498	-151.05074	11024679	wild caught	Annelida			Animalia		KNWR-2016.02-Slikok-Ento	MG33
http://creativecommons.org/publicdomain/zero/1.0/	KNWR:Ento:11283	Collembola			Collembola	BoLD barcode ID=MOBIL6489-18	(same lot as) KNWR:Ento http://arctos.database.museum/guid/KNWR:Ento:10943	Joel Stone, Dawn Magness	12	United States	Alaska	Soldotna, forest 180m southwest of Nordic Lake, Slikok watershed project site MG29, west half of plot		6/17/2016	2016-06-17	2016-06-17	whole organism	60.44581	-151.08721	10970736	wild caught	Arthropoda			Animalia		KNWR-2016.02-Slikok-Ento	MG29
http://creativecommons.org/publicdomain/zero/1.0/	KNWR:Ento:11013	Arthropoda				NCBI Biosample=SAMN08273541	(same lot as) UAMObs:Ento http://arctos.database.museum/guid/UAMObs:Ento:240760; (same lot as) UAMObs:Ento http://arctos.database.museum/guid/UAMObs:Ento:240761; (same lot as) UAMObs:Ento http://arctos.database.museum/guid/UAMObs:Ento:240762; (same lot as) UAMObs:Ento http://arctos.database.museum/guid/UAMObs:Ento:240763; (same lot as) UAMObs:Ento http://arctos.database.museum/guid/UAMObs:Ento:24…	Mariah McInnis, Matt Bowser	12	United States	Alaska	Soldotna, forest 120m east of Nordic Lake, Slikok watershed project site MG24, east half of plot		8/3/2016	2016-08-03	2016-08-03	whole organism	60.45008	-151.0777	10977527	wild caught	Arthropoda			Animalia		KNWR-2016.02-Slikok-Ento	MG24
http://creativecommons.org/publicdomain/zero/1.0/	KNWR:Ento:11065	Annelida						Mariah McInnis, Matt Bowser	6	United States	Alaska	Soldotna, forest 1km south of Headquarters Lake, vicinity of Slikok watershed project site MG32		7/29/2016	2016-07-29	2016-07-29	whole organism	60.4452	-151.05978	11024678	wild caught	Annelida			Animalia		KNWR-2016.02-Slikok-Ento	MG32
http://creativecommons.org/publicdomain/zero/1.0/	KNWR:Ento:11076	Lepidoptera	Lepidoptera		Insecta			Mariah McInnis, Matt Bowser	6	United States	Alaska	Soldotna, Ski Hill Road, off of Howling Hill Trail, vicinity of Slikok watershed project site MG17		8/9/2016	2016-08-09	2016-08-09	whole organism	60.45478	-151.08653	11024673	wild caught	Arthropoda			Animalia		KNWR-2016.02-Slikok-Ento	MG17
http://creativecommons.org/publicdomain/zero/1.0/	KNWR:Herb:11582	Hypogymnia protea	Lecanorales	Parmeliaceae	Lecanoromycetes		(same lot as) KNWR:Herb http://arctos.database.museum/guid/KNWR:Herb:10450		20	United States	Alaska	Soldotna, 100m west of Sterling Highway and 1.3km from intersection with Funny River Road, Slikok watershed project site MG04		8/10/2016	2016-08-10	2016-08-10	whole organism	60.46387	-151.09473	10975195		Ascomycota	Hypogymnia		Fungi	Hypogymnia protea	KNWR-2016.02-Slikok-Herb	MG04
http://creativecommons.org/publicdomain/zero/1.0/	KNWR:Herb:11570	Lophozia ventricosa	Jungermanniales	Jungermanniaceae	Hepatopsida		(same lot as) KNWR:Herb http://arctos.database.museum/guid/KNWR:Herb:10449		20	United States	Alaska	Soldotna, Ski Hill Road, Centennial Trail north of Headquarters Lake, Slikok watershed project site MG02		7/19/2016	2016-07-19	2016-07-19	whole organism	60.46755	-151.05787	10975194		Marchantiophyta	Lophozia		Plantae	Lophozia ventricosa	KNWR-2016.02-Slikok-Herb	MG02
http://creativecommons.org/publicdomain/zero/1.0/	KNWR:Herb:11577	Bryoria pseudofuscescens	Lecanorales	Parmeliaceae	Lecanoromycetes		(same lot as) KNWR:Herb http://arctos.database.museum/guid/KNWR:Herb:10450		20	United States	Alaska	Soldotna, 100m west of Sterling Highway and 1.3km from intersection with Funny River Road, Slikok watershed project site MG04		8/10/2016	2016-08-10	2016-08-10	whole organism	60.46387	-151.09473	10975195		Ascomycota	Bryoria		Fungi	Bryoria pseudofuscescens	KNWR-2016.02-Slikok-Herb	MG04
http://creativecommons.org/publicdomain/zero/1.0/	KNWR:Herb:10451	Fungi or Plantae					(same lot as) KNWR:Herb http://arctos.database.museum/guid/KNWR:Herb:11597; (same lot as) KNWR:Herb http://arctos.database.museum/guid/KNWR:Herb:11598; (same lot as) KNWR:Herb http://arctos.database.museum/guid/KNWR:Herb:11599; (same lot as) KNWR:Herb http://arctos.database.museum/guid/KNWR:Herb:11600; (same lot as) KNWR:Herb http://arctos.database.museum/guid/KNWR:Herb:11601; (same lot as) KNWR:…	Matt Bowser, Joel Stone	20	United States	Alaska	Soldotna, Ski Hill Road, Slikok watershed project site MG05		7/22/2016	2016-07-22	2016-07-22	whole organism	60.46368	-151.08561	10975196	wild caught				Plantae, Fungi		KNWR-2016.02-Slikok-Herb	MG05
http://creativecommons.org/publicdomain/zero/1.0/	KNWR:Herb:10469	Fungi or Plantae					(same lot as) KNWR:Herb http://arctos.database.museum/guid/KNWR:Herb:12067; (same lot as) KNWR:Herb http://arctos.database.museum/guid/KNWR:Herb:12068; (same lot as) KNWR:Herb http://arctos.database.museum/guid/KNWR:Herb:12069; (same lot as) KNWR:Herb http://arctos.database.museum/guid/KNWR:Herb:12070; (same lot as) KNWR:Herb http://arctos.database.museum/guid/KNWR:Herb:12071; (same lot as) KNWR:…	Matt Bowser, Mariah McInnis	20	United States	Alaska	Soldotna, forest 180m southwest of Nordic Lake, Slikok watershed project site MG29		8/9/2016	2016-08-09	2016-08-09	whole organism	60.44581	-151.08721	10975214	wild caught				Plantae, Fungi		KNWR-2016.02-Slikok-Herb	MG29
http://creativecommons.org/publicdomain/zero/1.0/	KNWR:Herb:10475	Fungi or Plantae					(same lot as) KNWR:Herb http://arctos.database.museum/guid/KNWR:Herb:12014; (same lot as) KNWR:Herb http://arctos.database.museum/guid/KNWR:Herb:12015; (same lot as) KNWR:Herb http://arctos.database.museum/guid/KNWR:Herb:12016; (same lot as) KNWR:Herb http://arctos.database.museum/guid/KNWR:Herb:12017; (same lot as) KNWR:Herb http://arctos.database.museum/guid/KNWR:Herb:12018; (same lot as) KNWR:…	Matt Bowser, Mariah McInnis	20	United States	Alaska	Soldotna, forest between Raven Ridge Trail and Central Peninsula landfill, Slikok watershed project site MG35		7/26/2016	2016-07-26	2016-07-26	whole organism	60.44154	-151.09672	10975220	wild caught				Plantae, Fungi		KNWR-2016.02-Slikok-Herb	MG35
http://creativecommons.org/publicdomain/zero/1.0/	KNWR:Herb:10479	Fungi or Plantae					(same lot as) KNWR:Herb http://arctos.database.museum/guid/KNWR:Herb:12218; (same lot as) KNWR:Herb http://arctos.database.museum/guid/KNWR:Herb:12219; (same lot as) KNWR:Herb http://arctos.database.museum/guid/KNWR:Herb:12220; (same lot as) KNWR:Herb http://arctos.database.museum/guid/KNWR:Herb:12222; (same lot as) KNWR:Herb http://arctos.database.museum/guid/KNWR:Herb:12223; (same lot as) KNWR:…	Matt Bowser	20	United States	Alaska	Soldotna, Ski Hill Road, off of Centennial Trail 480m northeast of Kenai National Wildlife Refuge headquarters building, Slikok watershed project site SK03		7/19/2016	2016-07-19	2016-07-19	whole organism	60.46775	-151.06698	10975224	wild caught				Plantae, Fungi		KNWR-2016.02-Slikok-Herb	SK03
http://creativecommons.org/publicdomain/zero/1.0/	KNWR:Herb:10485	Fungi or Plantae					(same lot as) KNWR:Herb http://arctos.database.museum/guid/KNWR:Herb:12123; (same lot as) KNWR:Herb http://arctos.database.museum/guid/KNWR:Herb:12124; (same lot as) KNWR:Herb http://arctos.database.museum/guid/KNWR:Herb:12125; (same lot as) KNWR:Herb http://arctos.database.museum/guid/KNWR:Herb:12126; (same lot as) KNWR:Herb http://arctos.database.museum/guid/KNWR:Herb:12127; (same lot as) KNWR:…	Matt Bowser, Mariah McInnis	20	United States	Alaska	Soldotna, forest 610m southweast of Nordic Lake, Slikok watershed project site SK22		8/9/2016	2016-08-09	2016-08-09	whole organism	60.44135	-151.08761	10975230	wild caught				Plantae, Fungi		KNWR-2016.02-Slikok-Herb	SK22
http://creativecommons.org/publicdomain/zero/1.0/	KNWR:Herb:11587	Mycoblastus sanguinarius	Lecanorales	Mycoblastaceae	Lecanoromycetes		(same lot as) KNWR:Herb http://arctos.database.museum/guid/KNWR:Herb:10450		20	United States	Alaska	Soldotna, 100m west of Sterling Highway and 1.3km from intersection with Funny River Road, Slikok watershed project site MG04		8/10/2016	2016-08-10	2016-08-10	whole organism	60.46387	-151.09473	10975195		Ascomycota	Mycoblastus		Fungi	Mycoblastus sanguinarius	KNWR-2016.02-Slikok-Herb	MG04
http://creativecommons.org/publicdomain/zero/1.0/	KNWR:Herb:11589	Ochrolechia szatalaensis		Pertusariaceae	Lecanoromycetes		(same lot as) KNWR:Herb http://arctos.database.museum/guid/KNWR:Herb:10450		20	United States	Alaska	Soldotna, 100m west of Sterling Highway and 1.3km from intersection with Funny River Road, Slikok watershed project site MG04		8/10/2016	2016-08-10	2016-08-10	whole organism	60.46387	-151.09473	10975195		Ascomycota	Ochrolechia		Fungi	Ochrolechia szatalaensis	KNWR-2016.02-Slikok-Herb	MG04
http://creativecommons.org/publicdomain/zero/1.0/	KNWR:Herb:11592	Pleurozium schreberi	Hypnales	Hylocomiaceae	Bryopsida		(same lot as) KNWR:Herb http://arctos.database.museum/guid/KNWR:Herb:10450		20	United States	Alaska	Soldotna, 100m west of Sterling Highway and 1.3km from intersection with Funny River Road, Slikok watershed project site MG04		8/10/2016	2016-08-10	2016-08-10	whole organism	60.46387	-151.09473	10975195		Bryophyta	Pleurozium		Plantae	Pleurozium schreberi	KNWR-2016.02-Slikok-Herb	MG04
http://creativecommons.org/publicdomain/zero/1.0/	KNWR:Herb:11594	Ramboldia cinnabarina	Lecanorales	Lecanoraceae	Lecanoromycetes		(same lot as) KNWR:Herb http://arctos.database.museum/guid/KNWR:Herb:10450		20	United States	Alaska	Soldotna, 100m west of Sterling Highway and 1.3km from intersection with Funny River Road, Slikok watershed project site MG04		8/10/2016	2016-08-10	2016-08-10	whole organism	60.46387	-151.09473	10975195		Ascomycota	Ramboldia		Fungi	Ramboldia cinnabarina	KNWR-2016.02-Slikok-Herb	MG04
http://creativecommons.org/publicdomain/zero/1.0/	KNWR:Herb:11595	Rinodina degeliana	Lecanorales	Physciaceae	Ascomycetes		(same lot as) KNWR:Herb http://arctos.database.museum/guid/KNWR:Herb:10450		20	United States	Alaska	Soldotna, 100m west of Sterling Highway and 1.3km from intersection with Funny River Road, Slikok watershed project site MG04		8/10/2016	2016-08-10	2016-08-10	whole organism	60.46387	-151.09473	10975195		Ascomycota	Rinodina		Fungi	Rinodina degeliana	KNWR-2016.02-Slikok-Herb	MG04
http://creativecommons.org/publicdomain/zero/1.0/	KNWR:Herb:11950	Ptilium crista-castrensis	Hypnales	Ptiliidae	Bryopsida		(same lot as) KNWR:Herb http://arctos.database.museum/guid/KNWR:Herb:10464		20	United States	Alaska	Soldotna, forest 720km southeast of Headquarters Lake, Slikok watershed project site MG21		7/20/2016	2016-07-20	2016-07-20	whole organism	60.45396	-151.04997	10975209		Bryophyta	Ptilium		Plantae	Ptilium crista-castrensis	KNWR-2016.02-Slikok-Herb	MG21
http://creativecommons.org/publicdomain/zero/1.0/	KNWR:Herb:11954	Tuckermannopsis chlorophylla	Lecanorales	Parmeliaceae	Lecanoromycetes		(same lot as) KNWR:Herb http://arctos.database.museum/guid/KNWR:Herb:10464		20	United States	Alaska	Soldotna, forest 720km southeast of Headquarters Lake, Slikok watershed project site MG21		7/20/2016	2016-07-20	2016-07-20	whole organism	60.45396	-151.04997	10975209		Ascomycota	Tuckermannopsis		Fungi	Tuckermannopsis chlorophylla	KNWR-2016.02-Slikok-Herb	MG21
http://creativecommons.org/publicdomain/zero/1.0/	KNWR:Herb:11955	Biatora pallens	Lecanorales	Bacidiaceae	Ascomycetes		(same lot as) KNWR:Herb http://arctos.database.museum/guid/KNWR:Herb:10465		20	United States	Alaska	Soldotna, muskeg 250m east of Arc Lake, Slikok watershed project site MG22		8/9/2016	2016-08-09	2016-08-09	whole organism	60.45048	-151.09592	10975210		Ascomycota	Biatora		Fungi	Biatora pallens	KNWR-2016.02-Slikok-Herb	MG22
http://creativecommons.org/publicdomain/zero/1.0/	KNWR:Herb:11957	Bryoria glabra	Lecanorales	Parmeliaceae	Ascomycetes		(same lot as) KNWR:Herb http://arctos.database.museum/guid/KNWR:Herb:10467		20	United States	Alaska	Soldotna, forest 600m south-southeast of Headquarters Lake, Slikok watershed project site MG26		7/20/2016	2016-07-20	2016-07-20	whole organism	60.44969	-151.05948	10975212		Ascomycota	Bryoria		Fungi	Bryoria glabra	KNWR-2016.02-Slikok-Herb	MG26
http://creativecommons.org/publicdomain/zero/1.0/	KNWR:Herb:11804	Hylocomium splendens	Hypnales	Hylocomiaceae	Bryopsida		(same lot as) KNWR:Herb http://arctos.database.museum/guid/KNWR:Herb:10466		20	United States	Alaska	Soldotna, forest 120m east of Nordic Lake, Slikok watershed project site MG24		8/3/2016	2016-08-03	2016-08-03	whole organism	60.45008	-151.0777	10975211		Bryophyta	Hylocomium		Plantae	Hylocomium splendens	KNWR-2016.02-Slikok-Herb	MG24
http://creativecommons.org/publicdomain/zero/1.0/	KNWR:Herb:11814	Polytrichum commune	Polytrichales	Polytrichaceae	Bryopsida		(same lot as) KNWR:Herb http://arctos.database.museum/guid/KNWR:Herb:10466		20	United States	Alaska	Soldotna, forest 120m east of Nordic Lake, Slikok watershed project site MG24		8/3/2016	2016-08-03	2016-08-03	whole organism	60.45008	-151.0777	10975211		Bryophyta	Polytrichum		Plantae	Polytrichum commune	KNWR-2016.02-Slikok-Herb	MG24
http://creativecommons.org/publicdomain/zero/1.0/	KNWR:Herb:11817	Plagiothecium laetum	Hypnales	Plagiotheciaceae	Bryopsida		(same lot as) KNWR:Herb http://arctos.database.museum/guid/KNWR:Herb:10457		20	United States	Alaska	Soldotna, in wetland 400m south-southwest of floatplane dock on Headquarters Lake, Slikok watershed project site MG12		8/1/2016	2016-08-01	2016-08-01	whole organism	60.45902	-151.0769	10975202		Bryophyta	Plagiothecium		Plantae	Plagiothecium laetum	KNWR-2016.02-Slikok-Herb	MG12
http://creativecommons.org/publicdomain/zero/1.0/	KNWR:Herb:11818	Pleurozium schreberi	Hypnales	Hylocomiaceae	Bryopsida		(same lot as) KNWR:Herb http://arctos.database.museum/guid/KNWR:Herb:10457		20	United States	Alaska	Soldotna, in wetland 400m south-southwest of floatplane dock on Headquarters Lake, Slikok watershed project site MG12		8/1/2016	2016-08-01	2016-08-01	whole organism	60.45902	-151.0769	10975202		Bryophyta	Pleurozium		Plantae	Pleurozium schreberi	KNWR-2016.02-Slikok-Herb	MG12
http://creativecommons.org/publicdomain/zero/1.0/	KNWR:Herb:11819	Polytrichum strictum	Polytrichales	Polytrichaceae	Bryopsida		(same lot as) KNWR:Herb http://arctos.database.museum/guid/KNWR:Herb:10457		20	United States	Alaska	Soldotna, in wetland 400m south-southwest of floatplane dock on Headquarters Lake, Slikok watershed project site MG12		8/1/2016	2016-08-01	2016-08-01	whole organism	60.45902	-151.0769	10975202		Bryophyta	Polytrichum		Plantae	Polytrichum strictum	KNWR-2016.02-Slikok-Herb	MG12
http://creativecommons.org/publicdomain/zero/1.0/	KNWR:Herb:11842	Hypogymnia occidentalis	Lecanorales	Parmeliaceae	Lecanoromycetes		(same lot as) KNWR:Herb http://arctos.database.museum/guid/KNWR:Herb:10458		20	United States	Alaska	Soldotna, muskeg 40m east of Headquarters Lake, Slikok watershed project site MG14		7/18/2016	2016-07-18	2016-07-18	whole organism	60.45862	-151.05868	10975203		Ascomycota	Hypogymnia		Fungi	Hypogymnia occidentalis	KNWR-2016.02-Slikok-Herb	MG14
http://creativecommons.org/publicdomain/zero/1.0/	KNWR:Herb:11861	Tuckermannopsis chlorophylla	Lecanorales	Parmeliaceae	Lecanoromycetes		(same lot as) KNWR:Herb http://arctos.database.museum/guid/KNWR:Herb:10458		20	United States	Alaska	Soldotna, muskeg 40m east of Headquarters Lake, Slikok watershed project site MG14		7/18/2016	2016-07-18	2016-07-18	whole organism	60.45862	-151.05868	10975203		Ascomycota	Tuckermannopsis		Fungi	Tuckermannopsis chlorophylla	KNWR-2016.02-Slikok-Herb	MG14
http://creativecommons.org/publicdomain/zero/1.0/	KNWR:Herb:11862	Biatora efflorescens	Lecanorales	Bacidiaceae	Ascomycetes		(same lot as) KNWR:Herb http://arctos.database.museum/guid/KNWR:Herb:10459		20	United States	Alaska	Soldotna, 210m east-southeast of intersection of Sterling Highway and south end of Ski Hill Road, Slikok watershed project site MG16		8/9/2016	2016-08-09	2016-08-09	whole organism	60.45494	-151.09552	10975204		Ascomycota	Biatora		Fungi	Biatora efflorescens	KNWR-2016.02-Slikok-Herb	MG16
http://creativecommons.org/publicdomain/zero/1.0/	KNWR:Herb:11869	Lecanora fuscescens	Lecanorales	Lecanoraceae	Lecanoromycetes		(same lot as) KNWR:Herb http://arctos.database.museum/guid/KNWR:Herb:10459		20	United States	Alaska	Soldotna, 210m east-southeast of intersection of Sterling Highway and south end of Ski Hill Road, Slikok watershed project site MG16		8/9/2016	2016-08-09	2016-08-09	whole organism	60.45494	-151.09552	10975204		Ascomycota	Lecanora		Fungi	Lecanora fuscescens	KNWR-2016.02-Slikok-Herb	MG16
http://creativecommons.org/publicdomain/zero/1.0/	KNWR:Herb:11874	Parmelia sulcata	Lecanorales	Parmeliaceae	Lecanoromycetes		(same lot as) KNWR:Herb http://arctos.database.museum/guid/KNWR:Herb:10459		20	United States	Alaska	Soldotna, 210m east-southeast of intersection of Sterling Highway and south end of Ski Hill Road, Slikok watershed project site MG16		8/9/2016	2016-08-09	2016-08-09	whole organism	60.45494	-151.09552	10975204		Ascomycota	Parmelia		Fungi	Parmelia sulcata	KNWR-2016.02-Slikok-Herb	MG16
http://creativecommons.org/publicdomain/zero/1.0/	KNWR:Herb:11881	Polytrichum commune	Polytrichales	Polytrichaceae	Bryopsida		(same lot as) KNWR:Herb http://arctos.database.museum/guid/KNWR:Herb:10459		20	United States	Alaska	Soldotna, 210m east-southeast of intersection of Sterling Highway and south end of Ski Hill Road, Slikok watershed project site MG16		8/9/2016	2016-08-09	2016-08-09	whole organism	60.45494	-151.09552	10975204		Bryophyta	Polytrichum		Plantae	Polytrichum commune	KNWR-2016.02-Slikok-Herb	MG16
http://creativecommons.org/publicdomain/zero/1.0/	KNWR:Herb:11886	Sanionia uncinata	Hypnales	Amblystegiaceae	Bryopsida		(same lot as) KNWR:Herb http://arctos.database.museum/guid/KNWR:Herb:10459		20	United States	Alaska	Soldotna, 210m east-southeast of intersection of Sterling Highway and south end of Ski Hill Road, Slikok watershed project site MG16		8/9/2016	2016-08-09	2016-08-09	whole organism	60.45494	-151.09552	10975204		Bryophyta	Sanionia		Plantae	Sanionia uncinata	KNWR-2016.02-Slikok-Herb	MG16
http://creativecommons.org/publicdomain/zero/1.0/	KNWR:Herb:11888	Bryoria pseudofuscescens	Lecanorales	Parmeliaceae	Lecanoromycetes		(same lot as) KNWR:Herb http://arctos.database.museum/guid/KNWR:Herb:10460		20	United States	Alaska	Soldotna, Ski Hill Road, off of Howling Hill Trail, Slikok watershed project site MG17		8/9/2016	2016-08-09	2016-08-09	whole organism	60.45475	-151.08641	10975205		Ascomycota	Bryoria		Fungi	Bryoria pseudofuscescens	KNWR-2016.02-Slikok-Herb	MG17
http://creativecommons.org/publicdomain/zero/1.0/	KNWR:Herb:11772	Cladonia botrytes	Lecanorales	Cladoniaceae	Lecanoromycetes		(same lot as) KNWR:Herb http://arctos.database.museum/guid/KNWR:Herb:10465		20	United States	Alaska	Soldotna, muskeg 250m east of Arc Lake, Slikok watershed project site MG22		8/9/2016	2016-08-09	2016-08-09	whole organism	60.45048	-151.09592	10975210		Ascomycota	Cladonia		Fungi	Cladonia botrytes	KNWR-2016.02-Slikok-Herb	MG22
http://creativecommons.org/publicdomain/zero/1.0/	KNWR:Herb:11773	Cladonia carneola	Lecanorales	Cladoniaceae	Lecanoromycetes		(same lot as) KNWR:Herb http://arctos.database.museum/guid/KNWR:Herb:10465		20	United States	Alaska	Soldotna, muskeg 250m east of Arc Lake, Slikok watershed project site MG22		8/9/2016	2016-08-09	2016-08-09	whole organism	60.45048	-151.09592	10975210		Ascomycota	Cladonia		Fungi	Cladonia carneola	KNWR-2016.02-Slikok-Herb	MG22
http://creativecommons.org/publicdomain/zero/1.0/	KNWR:Herb:11910	Calicium viride	Caliciales	Caliciaceae	Ascomycetes		(same lot as) KNWR:Herb http://arctos.database.museum/guid/KNWR:Herb:10462		20	United States	Alaska	Soldotna, shore of southeastern bay of Headquarters Lake, Slikok watershed project site MG19		8/3/2016	2016-08-03	2016-08-03	whole organism	60.45435	-151.06819	10975207		Ascomycota	Calicium		Fungi	Calicium viride	KNWR-2016.02-Slikok-Herb	MG19
http://creativecommons.org/publicdomain/zero/1.0/	KNWR:Herb:11911	Chrysothrix candelaris	Arthoniales	Chrysotrichaceae	Ascomycetes		(same lot as) KNWR:Herb http://arctos.database.museum/guid/KNWR:Herb:10462		20	United States	Alaska	Soldotna, shore of southeastern bay of Headquarters Lake, Slikok watershed project site MG19		8/3/2016	2016-08-03	2016-08-03	whole organism	60.45435	-151.06819	10975207		Ascomycota	Chrysothrix		Fungi	Chrysothrix candelaris	KNWR-2016.02-Slikok-Herb	MG19
http://creativecommons.org/publicdomain/zero/1.0/	KNWR:Herb:11920	Sphagnum girgensohnii	Sphagnales	Sphagnaceae	Sphagnopsida		(same lot as) KNWR:Herb http://arctos.database.museum/guid/KNWR:Herb:10462		20	United States	Alaska	Soldotna, shore of southeastern bay of Headquarters Lake, Slikok watershed project site MG19		8/3/2016	2016-08-03	2016-08-03	whole organism	60.45435	-151.06819	10975207		Bryophyta	Sphagnum		Plantae	Sphagnum girgensohnii	KNWR-2016.02-Slikok-Herb	MG19
http://creativecommons.org/publicdomain/zero/1.0/	KNWR:Herb:11931	Parmelia sulcata	Lecanorales	Parmeliaceae	Lecanoromycetes		(same lot as) KNWR:Herb http://arctos.database.museum/guid/KNWR:Herb:10463		20	United States	Alaska	Soldotna, muskeg 230m southeast of Headquarters Lake, Slikok watershed project site MG20		7/20/2016	2016-07-20	2016-07-20	whole organism	60.45415	-151.05908	10975208		Ascomycota	Parmelia		Fungi	Parmelia sulcata	KNWR-2016.02-Slikok-Herb	MG20
http://creativecommons.org/publicdomain/zero/1.0/	KNWR:Herb:11675	Ramboldia cinnabarina	Lecanorales	Lecanoraceae	Lecanoromycetes		(same lot as) KNWR:Herb http://arctos.database.museum/guid/KNWR:Herb:10456		20	United States	Alaska	Soldotna, 40m east of Sterling Highway 480m northeast of intersection with south end of Ski Hill Road, Slikok watershed project site MG10		8/10/2016	2016-08-10	2016-08-10	whole organism	60.45941	-151.09513	10975201		Ascomycota	Ramboldia		Fungi	Ramboldia cinnabarina	KNWR-2016.02-Slikok-Herb	MG10
http://creativecommons.org/publicdomain/zero/1.0/	KNWR:Herb:11676	Rhytidiadelphus subpinnatus	Hypnales	Hylocomiaceae	Bryopsida		(same lot as) KNWR:Herb http://arctos.database.museum/guid/KNWR:Herb:10456		20	United States	Alaska	Soldotna, 40m east of Sterling Highway 480m northeast of intersection with south end of Ski Hill Road, Slikok watershed project site MG10		8/10/2016	2016-08-10	2016-08-10	whole organism	60.45941	-151.09513	10975201		Bryophyta	Rhytidiadelphus		Plantae	Rhytidiadelphus subpinnatus	KNWR-2016.02-Slikok-Herb	MG10
http://creativecommons.org/publicdomain/zero/1.0/	KNWR:Herb:11685	Bryoria cfr fremontii	Lecanorales	Parmeliaceae	Lecanoromycetes		(same lot as) KNWR:Herb http://arctos.database.museum/guid/KNWR:Herb:10454		20	United States	Alaska	Soldotna, muskeg 120m northeast of Headquarters Lake, Slikok watershed project site MG08		7/22/2016	2016-07-22	2016-07-22	whole organism	60.46309	-151.05827	10975199		Ascomycota	Bryoria		Fungi		KNWR-2016.02-Slikok-Herb	MG08
http://creativecommons.org/publicdomain/zero/1.0/	KNWR:Herb:11691	Cladina stygia	Lecanorales	Cladoniaceae	Ascomycetes		(same lot as) KNWR:Herb http://arctos.database.museum/guid/KNWR:Herb:10454		20	United States	Alaska	Soldotna, muskeg 120m northeast of Headquarters Lake, Slikok watershed project site MG08		7/22/2016	2016-07-22	2016-07-22	whole organism	60.46309	-151.05827	10975199		Ascomycota	Cladina		Fungi	Cladina stygia	KNWR-2016.02-Slikok-Herb	MG08
http://creativecommons.org/publicdomain/zero/1.0/	KNWR:Herb:11699	Mycoblastus sanguinarius	Lecanorales	Mycoblastaceae	Lecanoromycetes		(same lot as) KNWR:Herb http://arctos.database.museum/guid/KNWR:Herb:10457		20	United States	Alaska	Soldotna, in wetland 400m south-southwest of floatplane dock on Headquarters Lake, Slikok watershed project site MG12		8/1/2016	2016-08-01	2016-08-01	whole organism	60.45902	-151.0769	10975202		Ascomycota	Mycoblastus		Fungi	Mycoblastus sanguinarius	KNWR-2016.02-Slikok-Herb	MG12
http://creativecommons.org/publicdomain/zero/1.0/	KNWR:Herb:11700	Cladonia cornuta	Lecanorales	Cladoniaceae	Lecanoromycetes		(same lot as) KNWR:Herb http://arctos.database.museum/guid/KNWR:Herb:10454		20	United States	Alaska	Soldotna, muskeg 120m northeast of Headquarters Lake, Slikok watershed project site MG08		7/22/2016	2016-07-22	2016-07-22	whole organism	60.46309	-151.05827	10975199		Ascomycota	Cladonia		Fungi	Cladonia cornuta	KNWR-2016.02-Slikok-Herb	MG08
http://creativecommons.org/publicdomain/zero/1.0/	KNWR:Herb:11702	Cladonia fimbriata	Lecanorales	Cladoniaceae	Lecanoromycetes		(same lot as) KNWR:Herb http://arctos.database.museum/guid/KNWR:Herb:10454		20	United States	Alaska	Soldotna, muskeg 120m northeast of Headquarters Lake, Slikok watershed project site MG08		7/22/2016	2016-07-22	2016-07-22	whole organism	60.46309	-151.05827	10975199		Ascomycota	Cladonia		Fungi	Cladonia fimbriata	KNWR-2016.02-Slikok-Herb	MG08
http://creativecommons.org/publicdomain/zero/1.0/	KNWR:Herb:11709	Lecanora symmicta	Lecanorales	Lecanoraceae	Lecanoromycetes		(same lot as) KNWR:Herb http://arctos.database.museum/guid/KNWR:Herb:10454		20	United States	Alaska	Soldotna, muskeg 120m northeast of Headquarters Lake, Slikok watershed project site MG08		7/22/2016	2016-07-22	2016-07-22	whole organism	60.46309	-151.05827	10975199		Ascomycota	Lecanora		Fungi	Lecanora symmicta	KNWR-2016.02-Slikok-Herb	MG08
http://creativecommons.org/publicdomain/zero/1.0/	KNWR:Herb:11719	Pleurozium schreberi	Hypnales	Hylocomiaceae	Bryopsida		(same lot as) KNWR:Herb http://arctos.database.museum/guid/KNWR:Herb:10454		20	United States	Alaska	Soldotna, muskeg 120m northeast of Headquarters Lake, Slikok watershed project site MG08		7/22/2016	2016-07-22	2016-07-22	whole organism	60.46309	-151.05827	10975199		Bryophyta	Pleurozium		Plantae	Pleurozium schreberi	KNWR-2016.02-Slikok-Herb	MG08
http://creativecommons.org/publicdomain/zero/1.0/	KNWR:Herb:11734	Bryoria fuscescens	Lecanorales	Parmeliaceae	Lecanoromycetes		(same lot as) KNWR:Herb http://arctos.database.museum/guid/KNWR:Herb:10455		20	United States	Alaska	Soldotna, muskeg 0.6km northeast of Headquarters Lake, Slikok watershed project site MG09		7/19/2016	2016-07-19	2016-07-19	whole organism	60.46289	-151.04916	10975200		Ascomycota	Bryoria		Fungi	Bryoria fuscescens	KNWR-2016.02-Slikok-Herb	MG09
http://creativecommons.org/publicdomain/zero/1.0/	KNWR:Herb:11739	Sphagnum angustifolium	Sphagnales	Sphagnaceae	Sphagnopsida		(same lot as) KNWR:Herb http://arctos.database.museum/guid/KNWR:Herb:10455		20	United States	Alaska	Soldotna, muskeg 0.6km northeast of Headquarters Lake, Slikok watershed project site MG09		7/19/2016	2016-07-19	2016-07-19	whole organism	60.46289	-151.04916	10975200		Bryophyta	Sphagnum		Plantae	Sphagnum angustifolium	KNWR-2016.02-Slikok-Herb	MG09
http://creativecommons.org/publicdomain/zero/1.0/	KNWR:Herb:11746	Bryoria inactiva	Lecanorales	Parmeliaceae	Lecanoromycetes		(same lot as) KNWR:Herb http://arctos.database.museum/guid/KNWR:Herb:10456		20	United States	Alaska	Soldotna, 40m east of Sterling Highway 480m northeast of intersection with south end of Ski Hill Road, Slikok watershed project site MG10		8/10/2016	2016-08-10	2016-08-10	whole organism	60.45941	-151.09513	10975201		Ascomycota	Bryoria		Fungi	Bryoria inactiva	KNWR-2016.02-Slikok-Herb	MG10
http://creativecommons.org/publicdomain/zero/1.0/	KNWR:Herb:11754	Cladonia gracilis subsp. turbinata	Lecanorales	Cladoniaceae	Ascomycetes		(same lot as) KNWR:Herb http://arctos.database.museum/guid/KNWR:Herb:10456		20	United States	Alaska	Soldotna, 40m east of Sterling Highway 480m northeast of intersection with south end of Ski Hill Road, Slikok watershed project site MG10		8/10/2016	2016-08-10	2016-08-10	whole organism	60.45941	-151.09513	10975201		Ascomycota	Cladonia		Fungi	Cladonia gracilis	KNWR-2016.02-Slikok-Herb	MG10
http://creativecommons.org/publicdomain/zero/1.0/	KNWR:Herb:11758	Hylocomium splendens	Hypnales	Hylocomiaceae	Bryopsida		(same lot as) KNWR:Herb http://arctos.database.museum/guid/KNWR:Herb:10456		20	United States	Alaska	Soldotna, 40m east of Sterling Highway 480m northeast of intersection with south end of Ski Hill Road, Slikok watershed project site MG10		8/10/2016	2016-08-10	2016-08-10	whole organism	60.45941	-151.09513	10975201		Bryophyta	Hylocomium		Plantae	Hylocomium splendens	KNWR-2016.02-Slikok-Herb	MG10
http://creativecommons.org/publicdomain/zero/1.0/	KNWR:Herb:11761	Japewia subaurifera	Lecanorales	Bacidiaceae	Lecanoromycetes		(same lot as) KNWR:Herb http://arctos.database.museum/guid/KNWR:Herb:10456		20	United States	Alaska	Soldotna, 40m east of Sterling Highway 480m northeast of intersection with south end of Ski Hill Road, Slikok watershed project site MG10		8/10/2016	2016-08-10	2016-08-10	whole organism	60.45941	-151.09513	10975201		Ascomycota	Japewia		Fungi	Japewia subaurifera	KNWR-2016.02-Slikok-Herb	MG10
http://creativecommons.org/publicdomain/zero/1.0/	KNWR:Herb:12279	Ramalina dilacerata	Lecanorales	Ramalinaceae	Lecanoromycetes		(same lot as) KNWR:Herb http://arctos.database.museum/guid/KNWR:Herb:10482		20	United States	Alaska	Soldotna, Ski Hill Road, Nordic View Trail by Nordic Lake, Slikok watershed project site SK15		8/9/2016	2016-08-09	2016-08-09	whole organism	60.45028	-151.08681	10975227		Ascomycota	Ramalina		Fungi	Ramalina dilacerata	KNWR-2016.02-Slikok-Herb	SK15
http://creativecommons.org/publicdomain/zero/1.0/	KNWR:Herb:11972	Brachythecium acutum	Hypnales	Brachytheciaceae	Bryopsida		(same lot as) KNWR:Herb http://arctos.database.museum/guid/KNWR:Herb:10472		20	United States	Alaska	Soldotna, forest 1km south of Headquarters Lake, Slikok watershed project site MG32		7/29/2016	2016-07-29	2016-07-29	whole organism	60.44522	-151.05989	10975217		Bryophyta	Brachythecium		Plantae	Brachythecium acutum	KNWR-2016.02-Slikok-Herb	MG32
http://creativecommons.org/publicdomain/zero/1.0/	KNWR:Herb:11982	Physcia aipolia	Lecanorales	Physciaceae	Lecanoromycetes		(same lot as) KNWR:Herb http://arctos.database.museum/guid/KNWR:Herb:10472		20	United States	Alaska	Soldotna, forest 1km south of Headquarters Lake, Slikok watershed project site MG32		7/29/2016	2016-07-29	2016-07-29	whole organism	60.44522	-151.05989	10975217		Ascomycota	Physcia		Fungi	Physcia aipolia	KNWR-2016.02-Slikok-Herb	MG32
http://creativecommons.org/publicdomain/zero/1.0/	KNWR:Herb:11996	Cladonia cornuta	Lecanorales	Cladoniaceae	Lecanoromycetes		(same lot as) KNWR:Herb http://arctos.database.museum/guid/KNWR:Herb:10473		20	United States	Alaska	Soldotna, forest 1.3km southeast of Headquarters Lake, Slikok watershed project site MG33		7/21/2016	2016-07-21	2016-07-21	whole organism	60.44502	-151.05078	10975218		Ascomycota	Cladonia		Fungi	Cladonia cornuta	KNWR-2016.02-Slikok-Herb	MG33
http://creativecommons.org/publicdomain/zero/1.0/	KNWR:Herb:12007	Pleurozium schreberi	Hypnales	Hylocomiaceae	Bryopsida		(same lot as) KNWR:Herb http://arctos.database.museum/guid/KNWR:Herb:10474		20	United States	Alaska	Soldotna, forest 1.6km southeast of Headquarters Lake, Slikok watershed project site MG34		7/21/2016	2016-07-21	2016-07-21	whole organism	60.44483	-151.04167	10975219		Bryophyta	Pleurozium		Plantae	Pleurozium schreberi	KNWR-2016.02-Slikok-Herb	MG34
http://creativecommons.org/publicdomain/zero/1.0/	KNWR:Herb:12009	Ptilium crista-castrensis	Hypnales	Ptiliidae	Bryopsida		(same lot as) KNWR:Herb http://arctos.database.museum/guid/KNWR:Herb:10474		20	United States	Alaska	Soldotna, forest 1.6km southeast of Headquarters Lake, Slikok watershed project site MG34		7/21/2016	2016-07-21	2016-07-21	whole organism	60.44483	-151.04167	10975219		Bryophyta	Ptilium		Plantae	Ptilium crista-castrensis	KNWR-2016.02-Slikok-Herb	MG34
http://creativecommons.org/publicdomain/zero/1.0/	KNWR:Herb:12052	Ptilium crista-castrensis	Hypnales	Ptiliidae	Bryopsida		(same lot as) KNWR:Herb http://arctos.database.museum/guid/KNWR:Herb:10468		20	United States	Alaska	Soldotna, forest 380m southeast of Arc Lake, Slikok watershed project site MG28		8/9/2016	2016-08-09	2016-08-09	whole organism	60.44601	-151.09632	10975213		Bryophyta	Ptilium		Plantae	Ptilium crista-castrensis	KNWR-2016.02-Slikok-Herb	MG28
http://creativecommons.org/publicdomain/zero/1.0/	KNWR:Herb:12057	Mycoblastus sanguinarius	Lecanorales	Mycoblastaceae	Lecanoromycetes		(same lot as) KNWR:Herb http://arctos.database.museum/guid/KNWR:Herb:10468		20	United States	Alaska	Soldotna, forest 380m southeast of Arc Lake, Slikok watershed project site MG28		8/9/2016	2016-08-09	2016-08-09	whole organism	60.44601	-151.09632	10975213		Ascomycota	Mycoblastus		Fungi	Mycoblastus sanguinarius	KNWR-2016.02-Slikok-Herb	MG28
http://creativecommons.org/publicdomain/zero/1.0/	KNWR:Herb:12059	Pertusaria suboculata		Pertusariaceae	Lecanoromycetes		(same lot as) KNWR:Herb http://arctos.database.museum/guid/KNWR:Herb:10468		20	United States	Alaska	Soldotna, forest 380m southeast of Arc Lake, Slikok watershed project site MG28		8/9/2016	2016-08-09	2016-08-09	whole organism	60.44601	-151.09632	10975213		Ascomycota	Pertusaria		Fungi	Pertusaria suboculata	KNWR-2016.02-Slikok-Herb	MG28
http://creativecommons.org/publicdomain/zero/1.0/	KNWR:Herb:12092	Aulacomnium palustre	Bryales	Aulacomniaceae	Bryopsida		(same lot as) KNWR:Herb http://arctos.database.museum/guid/KNWR:Herb:10470		20	United States	Alaska	Soldotna, forest 180m south-southeast of Nordic Lake, Slikok watershed project site MG30		8/3/2016	2016-08-03	2016-08-03	whole organism	60.44562	-151.0781	10975215		Bryophyta	Aulacomnium		Plantae	Aulacomnium palustre	KNWR-2016.02-Slikok-Herb	MG30
http://creativecommons.org/publicdomain/zero/1.0/	KNWR:Herb:12099	Mycoblastus sanguinarius	Lecanorales	Mycoblastaceae	Lecanoromycetes		(same lot as) KNWR:Herb http://arctos.database.museum/guid/KNWR:Herb:10470		20	United States	Alaska	Soldotna, forest 180m south-southeast of Nordic Lake, Slikok watershed project site MG30		8/3/2016	2016-08-03	2016-08-03	whole organism	60.44562	-151.0781	10975215		Ascomycota	Mycoblastus		Fungi	Mycoblastus sanguinarius	KNWR-2016.02-Slikok-Herb	MG30
http://creativecommons.org/publicdomain/zero/1.0/	KNWR:Herb:12114	Cladonia coniocraea	Lecanorales	Cladoniaceae	Lecanoromycetes		(same lot as) KNWR:Herb http://arctos.database.museum/guid/KNWR:Herb:10471		20	United States	Alaska	Soldotna, forest 980m south of Headquarters Lake, Slikok watershed project site MG31		7/29/2016	2016-07-29	2016-07-29	whole organism	60.44542	-151.069	10975216		Ascomycota	Cladonia		Fungi	Cladonia coniocraea	KNWR-2016.02-Slikok-Herb	MG31
http://creativecommons.org/publicdomain/zero/1.0/	KNWR:Herb:12117	Hylocomium splendens	Hypnales	Hylocomiaceae	Bryopsida		(same lot as) KNWR:Herb http://arctos.database.museum/guid/KNWR:Herb:10471		20	United States	Alaska	Soldotna, forest 980m south of Headquarters Lake, Slikok watershed project site MG31		7/29/2016	2016-07-29	2016-07-29	whole organism	60.44542	-151.069	10975216		Bryophyta	Hylocomium		Plantae	Hylocomium splendens	KNWR-2016.02-Slikok-Herb	MG31
http://creativecommons.org/publicdomain/zero/1.0/	KNWR:Herb:12127	Sphagnum rubellum	Sphagnales	Sphagnaceae	Sphagnopsida		(same lot as) KNWR:Herb http://arctos.database.museum/guid/KNWR:Herb:10485		20	United States	Alaska	Soldotna, forest 610m southweast of Nordic Lake, Slikok watershed project site SK22		8/9/2016	2016-08-09	2016-08-09	whole organism	60.44135	-151.08761	10975230		Bryophyta	Sphagnum		Plantae	Sphagnum rubellum	KNWR-2016.02-Slikok-Herb	SK22
http://creativecommons.org/publicdomain/zero/1.0/	KNWR:Herb:12136	Cladonia gracilis subsp. turbinata	Lecanorales	Cladoniaceae	Ascomycetes		(same lot as) KNWR:Herb http://arctos.database.museum/guid/KNWR:Herb:10486		20	United States	Alaska	Soldotna, forest 880m southeast of Nordic Lake, Slikok watershed project site SK23		8/3/2016	2016-08-03	2016-08-03	whole organism	60.44095	-151.0694	10975231		Ascomycota	Cladonia		Fungi	Cladonia gracilis	KNWR-2016.02-Slikok-Herb	SK23
http://creativecommons.org/publicdomain/zero/1.0/	KNWR:Herb:12144	Cladonia coniocraea	Lecanorales	Cladoniaceae	Lecanoromycetes		(same lot as) KNWR:Herb http://arctos.database.museum/guid/KNWR:Herb:10486		20	United States	Alaska	Soldotna, forest 880m southeast of Nordic Lake, Slikok watershed project site SK23		8/3/2016	2016-08-03	2016-08-03	whole organism	60.44095	-151.0694	10975231		Ascomycota	Cladonia		Fungi	Cladonia coniocraea	KNWR-2016.02-Slikok-Herb	SK23
http://creativecommons.org/publicdomain/zero/1.0/	KNWR:Herb:12148	Dicranum tauricum	Dicranales	Dicranaceae	Bryopsida		(same lot as) KNWR:Herb http://arctos.database.museum/guid/KNWR:Herb:10475		20	United States	Alaska	Soldotna, forest between Raven Ridge Trail and Central Peninsula landfill, Slikok watershed project site MG35		7/26/2016	2016-07-26	2016-07-26	whole organism	60.44154	-151.09672	10975220		Bryophyta	Dicranum		Plantae	Dicranum tauricum	KNWR-2016.02-Slikok-Herb	MG35
http://creativecommons.org/publicdomain/zero/1.0/	KNWR:Herb:12151	Lecanora symmicta	Lecanorales	Lecanoraceae	Lecanoromycetes		(same lot as) KNWR:Herb http://arctos.database.museum/guid/KNWR:Herb:10475		20	United States	Alaska	Soldotna, forest between Raven Ridge Trail and Central Peninsula landfill, Slikok watershed project site MG35		7/26/2016	2016-07-26	2016-07-26	whole organism	60.44154	-151.09672	10975220		Ascomycota	Lecanora		Fungi	Lecanora symmicta	KNWR-2016.02-Slikok-Herb	MG35
http://creativecommons.org/publicdomain/zero/1.0/	KNWR:Herb:12153	Parmelia sulcata	Lecanorales	Parmeliaceae	Lecanoromycetes		(same lot as) KNWR:Herb http://arctos.database.museum/guid/KNWR:Herb:10475		20	United States	Alaska	Soldotna, forest between Raven Ridge Trail and Central Peninsula landfill, Slikok watershed project site MG35		7/26/2016	2016-07-26	2016-07-26	whole organism	60.44154	-151.09672	10975220		Ascomycota	Parmelia		Fungi	Parmelia sulcata	KNWR-2016.02-Slikok-Herb	MG35
http://creativecommons.org/publicdomain/zero/1.0/	KNWR:Herb:12157	Ramalina thrausta	Lecanorales	Ramalinaceae	Lecanoromycetes		(same lot as) KNWR:Herb http://arctos.database.museum/guid/KNWR:Herb:10475		20	United States	Alaska	Soldotna, forest between Raven Ridge Trail and Central Peninsula landfill, Slikok watershed project site MG35		7/26/2016	2016-07-26	2016-07-26	whole organism	60.44154	-151.09672	10975220		Ascomycota	Ramalina		Fungi	Ramalina thrausta	KNWR-2016.02-Slikok-Herb	MG35
http://creativecommons.org/publicdomain/zero/1.0/	KNWR:Herb:12285	Mylia anomala	Jungermanniales	Jungermanniaceae	Hepatopsida		(same lot as) KNWR:Herb http://arctos.database.museum/guid/KNWR:Herb:10483		20	United States	Alaska	Soldotna, wetland 490m south of Headquarters Lake, Slikok watershed project site SK16		8/3/2016	2016-08-03	2016-08-03	whole organism	60.44989	-151.06859	10975228		Marchantiophyta	Mylia		Plantae	Mylia anomala	KNWR-2016.02-Slikok-Herb	SK16
http://creativecommons.org/publicdomain/zero/1.0/	KNWR:Herb:12190	Ochrolechia androgyna		Pertusariaceae	Lecanoromycetes		(same lot as) KNWR:Herb http://arctos.database.museum/guid/KNWR:Herb:10477		20	United States	Alaska	Soldotna, forest 1.5km south of Headquarters Lake, Slikok watershed project site MG39		7/29/2016	2016-07-29	2016-07-29	whole organism	60.44076	-151.06029	10975222		Ascomycota	Ochrolechia		Fungi	Ochrolechia androgyna	KNWR-2016.02-Slikok-Herb	MG39
http://creativecommons.org/publicdomain/zero/1.0/	KNWR:Herb:12196	Polytrichum strictum	Polytrichales	Polytrichaceae	Bryopsida		(same lot as) KNWR:Herb http://arctos.database.museum/guid/KNWR:Herb:10477		20	United States	Alaska	Soldotna, forest 1.5km south of Headquarters Lake, Slikok watershed project site MG39		7/29/2016	2016-07-29	2016-07-29	whole organism	60.44076	-151.06029	10975222		Bryophyta	Polytrichum		Plantae	Polytrichum strictum	KNWR-2016.02-Slikok-Herb	MG39
http://creativecommons.org/publicdomain/zero/1.0/	KNWR:Herb:11619	Ramalina dilacerata	Lecanorales	Ramalinaceae	Lecanoromycetes		(same lot as) KNWR:Herb http://arctos.database.museum/guid/KNWR:Herb:10451		20	United States	Alaska	Soldotna, Ski Hill Road, Slikok watershed project site MG05		7/22/2016	2016-07-22	2016-07-22	whole organism	60.46368	-151.08561	10975196		Ascomycota	Ramalina		Fungi	Ramalina dilacerata	KNWR-2016.02-Slikok-Herb	MG05
http://creativecommons.org/publicdomain/zero/1.0/	KNWR:Herb:11639	Lophozia ventricosa	Jungermanniales	Jungermanniaceae	Hepatopsida		(same lot as) KNWR:Herb http://arctos.database.museum/guid/KNWR:Herb:10452		20	United States	Alaska	Soldotna, Ski Hill Road, ski trails between new visitor center and old septic leach field, Slikok watershed project site MG06		8/10/2016	2016-08-10	2016-08-10	whole organism	60.46348	-151.0765	10975197		Marchantiophyta	Lophozia		Plantae	Lophozia ventricosa	KNWR-2016.02-Slikok-Herb	MG06
http://creativecommons.org/publicdomain/zero/1.0/	KNWR:Herb:11648	Tritomaria quinquedentata	Jungermanniales	Jungermanniaceae	Hepatopsida		(same lot as) KNWR:Herb http://arctos.database.museum/guid/KNWR:Herb:10452		20	United States	Alaska	Soldotna, Ski Hill Road, ski trails between new visitor center and old septic leach field, Slikok watershed project site MG06		8/10/2016	2016-08-10	2016-08-10	whole organism	60.46348	-151.0765	10975197		Marchantiophyta	Tritomaria		Plantae	Tritomaria quinquedentata	KNWR-2016.02-Slikok-Herb	MG06
http://creativecommons.org/publicdomain/zero/1.0/	KNWR:Herb:11657	Hypogymnia bitteri	Lecanorales	Parmeliaceae	Lecanoromycetes		(same lot as) KNWR:Herb http://arctos.database.museum/guid/KNWR:Herb:10453		20	United States	Alaska	Soldotna, woods on north shore of Headquarters Lake 200m east of Keen Eye Trail floating dock, Slikok watershed project site MG07		8/1/2016	2016-08-01	2016-08-01	whole organism	60.46328	-151.06739	10975198		Ascomycota	Hypogymnia		Fungi	Hypogymnia bitteri	KNWR-2016.02-Slikok-Herb	MG07
http://creativecommons.org/publicdomain/zero/1.0/	KNWR:Herb:11664	Peltigera leucophlebia		Peltigeraceae	Lecanoromycetes		(same lot as) KNWR:Herb http://arctos.database.museum/guid/KNWR:Herb:10453		20	United States	Alaska	Soldotna, woods on north shore of Headquarters Lake 200m east of Keen Eye Trail floating dock, Slikok watershed project site MG07		8/1/2016	2016-08-01	2016-08-01	whole organism	60.46328	-151.06739	10975198		Ascomycota	Peltigera		Fungi	Peltigera leucophlebia	KNWR-2016.02-Slikok-Herb	MG07
http://creativecommons.org/publicdomain/zero/1.0/	KNWR:Herb:12206	Hypogymnia physodes	Lecanorales	Parmeliaceae	Lecanoromycetes		(same lot as) KNWR:Herb http://arctos.database.museum/guid/KNWR:Herb:10478		20	United States	Alaska	Soldotna, forest 2km southeast of Headquarters Lake, Slikok watershed project site MG41		7/21/2016	2016-07-21	2016-07-21	whole organism	60.44036	-151.04208	10975223		Ascomycota	Hypogymnia		Fungi	Hypogymnia physodes	KNWR-2016.02-Slikok-Herb	MG41
http://creativecommons.org/publicdomain/zero/1.0/	KNWR:Herb:12207	Japewia subaurifera	Lecanorales	Bacidiaceae	Lecanoromycetes		(same lot as) KNWR:Herb http://arctos.database.museum/guid/KNWR:Herb:10478		20	United States	Alaska	Soldotna, forest 2km southeast of Headquarters Lake, Slikok watershed project site MG41		7/21/2016	2016-07-21	2016-07-21	whole organism	60.44036	-151.04208	10975223		Ascomycota	Japewia		Fungi	Japewia subaurifera	KNWR-2016.02-Slikok-Herb	MG41
http://creativecommons.org/publicdomain/zero/1.0/	KNWR:Herb:12208	Sphagnum girgensohnii	Sphagnales	Sphagnaceae	Sphagnopsida		(same lot as) KNWR:Herb http://arctos.database.museum/guid/KNWR:Herb:10477		20	United States	Alaska	Soldotna, forest 1.5km south of Headquarters Lake, Slikok watershed project site MG39		7/29/2016	2016-07-29	2016-07-29	whole organism	60.44076	-151.06029	10975222		Bryophyta	Sphagnum		Plantae	Sphagnum girgensohnii	KNWR-2016.02-Slikok-Herb	MG39
http://creativecommons.org/publicdomain/zero/1.0/	KNWR:Herb:12212	Parmelia sulcata	Lecanorales	Parmeliaceae	Lecanoromycetes		(same lot as) KNWR:Herb http://arctos.database.museum/guid/KNWR:Herb:10478		20	United States	Alaska	Soldotna, forest 2km southeast of Headquarters Lake, Slikok watershed project site MG41		7/21/2016	2016-07-21	2016-07-21	whole organism	60.44036	-151.04208	10975223		Ascomycota	Parmelia		Fungi	Parmelia sulcata	KNWR-2016.02-Slikok-Herb	MG41
http://creativecommons.org/publicdomain/zero/1.0/	KNWR:Herb:12230	Sanionia uncinata	Hypnales	Amblystegiaceae	Bryopsida		(same lot as) KNWR:Herb http://arctos.database.museum/guid/KNWR:Herb:10479		20	United States	Alaska	Soldotna, Ski Hill Road, off of Centennial Trail 480m northeast of Kenai National Wildlife Refuge headquarters building, Slikok watershed project site SK03		7/19/2016	2016-07-19	2016-07-19	whole organism	60.46775	-151.06698	10975224		Bryophyta	Sanionia		Plantae	Sanionia uncinata	KNWR-2016.02-Slikok-Herb	SK03
http://creativecommons.org/publicdomain/zero/1.0/	KNWR:Herb:12234	Hypogymnia physodes	Lecanorales	Parmeliaceae	Lecanoromycetes		(same lot as) KNWR:Herb http://arctos.database.museum/guid/KNWR:Herb:10479		20	United States	Alaska	Soldotna, Ski Hill Road, off of Centennial Trail 480m northeast of Kenai National Wildlife Refuge headquarters building, Slikok watershed project site SK03		7/19/2016	2016-07-19	2016-07-19	whole organism	60.46775	-151.06698	10975224		Ascomycota	Hypogymnia		Fungi	Hypogymnia physodes	KNWR-2016.02-Slikok-Herb	SK03
http://creativecommons.org/publicdomain/zero/1.0/	KNWR:Herb:12235	Chrysothrix candelaris	Arthoniales	Chrysotrichaceae	Ascomycetes		(same lot as) KNWR:Herb http://arctos.database.museum/guid/KNWR:Herb:10480		20	United States	Alaska	Soldotna, Ski Hill Road, forest 840m northeast of Headquarters Lake, Slikok watershed project site SK04		7/19/2016	2016-07-19	2016-07-19	whole organism	60.46735	-151.04875	10975225		Ascomycota	Chrysothrix		Fungi	Chrysothrix candelaris	KNWR-2016.02-Slikok-Herb	SK04
http://creativecommons.org/publicdomain/zero/1.0/	KNWR:Herb:12237	Dicranum fuscescens	Dicranales	Dicranaceae	Bryopsida		(same lot as) KNWR:Herb http://arctos.database.museum/guid/KNWR:Herb:10480		20	United States	Alaska	Soldotna, Ski Hill Road, forest 840m northeast of Headquarters Lake, Slikok watershed project site SK04		7/19/2016	2016-07-19	2016-07-19	whole organism	60.46735	-151.04875	10975225		Bryophyta	Dicranum		Plantae	Dicranum fuscescens	KNWR-2016.02-Slikok-Herb	SK04
http://creativecommons.org/publicdomain/zero/1.0/	KNWR:Herb:12242	Cladonia fimbriata	Lecanorales	Cladoniaceae	Lecanoromycetes		(same lot as) KNWR:Herb http://arctos.database.museum/guid/KNWR:Herb:10481		20	United States	Alaska	Soldotna, Ski Hill Road, Slikok watershed project site SK08		7/22/2016	2016-07-22	2016-07-22	whole organism	60.45921	-151.08601	10975226		Ascomycota	Cladonia		Fungi	Cladonia fimbriata	KNWR-2016.02-Slikok-Herb	SK08
http://creativecommons.org/publicdomain/zero/1.0/	KNWR:Herb:12254	Peltigera conspersa nom. prov.	Lecanorales	Peltigeraceae	Lecanoromycetes		(same lot as) KNWR:Herb http://arctos.database.museum/guid/KNWR:Herb:10481		20	United States	Alaska	Soldotna, Ski Hill Road, Slikok watershed project site SK08		7/22/2016	2016-07-22	2016-07-22	whole organism	60.45921	-151.08601	10975226		Ascomycota	Peltigera		Fungi		KNWR-2016.02-Slikok-Herb	SK08
http://creativecommons.org/publicdomain/zero/1.0/	KNWR:Herb:12255	Peltigera membranacea		Peltigeraceae	Lecanoromycetes		(same lot as) KNWR:Herb http://arctos.database.museum/guid/KNWR:Herb:10481		20	United States	Alaska	Soldotna, Ski Hill Road, Slikok watershed project site SK08		7/22/2016	2016-07-22	2016-07-22	whole organism	60.45921	-151.08601	10975226		Ascomycota	Peltigera		Fungi	Peltigera membranacea	KNWR-2016.02-Slikok-Herb	SK08
http://creativecommons.org/publicdomain/zero/1.0/	KNWR:Herb:12257	Phaeocalicium compressulum	Caliciales	Mycocaliciaceae	Ascomycetes		(same lot as) KNWR:Herb http://arctos.database.museum/guid/KNWR:Herb:10481		20	United States	Alaska	Soldotna, Ski Hill Road, Slikok watershed project site SK08		7/22/2016	2016-07-22	2016-07-22	whole organism	60.45921	-151.08601	10975226		Ascomycota	Phaeocalicium		Fungi	Phaeocalicium compressulum	KNWR-2016.02-Slikok-Herb	SK08
http://creativecommons.org/publicdomain/zero/1.0/	KNWR:Herb:12272	Biatora efflorescens	Lecanorales	Bacidiaceae	Ascomycetes		(same lot as) KNWR:Herb http://arctos.database.museum/guid/KNWR:Herb:10482		20	United States	Alaska	Soldotna, Ski Hill Road, Nordic View Trail by Nordic Lake, Slikok watershed project site SK15		8/9/2016	2016-08-09	2016-08-09	whole organism	60.45028	-151.08681	10975227		Ascomycota	Biatora		Fungi	Biatora efflorescens	KNWR-2016.02-Slikok-Herb	SK15
http://creativecommons.org/publicdomain/zero/1.0/	KNWR:Herb:12278	Pertusaria suboculata		Pertusariaceae	Lecanoromycetes		(same lot as) KNWR:Herb http://arctos.database.museum/guid/KNWR:Herb:10482		20	United States	Alaska	Soldotna, Ski Hill Road, Nordic View Trail by Nordic Lake, Slikok watershed project site SK15		8/9/2016	2016-08-09	2016-08-09	whole organism	60.45028	-151.08681	10975227		Ascomycota	Pertusaria		Fungi	Pertusaria suboculata	KNWR-2016.02-Slikok-Herb	SK15
http://creativecommons.org/publicdomain/zero/1.0/	KNWR:Herb:12305	Chaenothecopsis tasmanica	Caliciales	Mycocaliciaceae	Ascomycetes		(same lot as) KNWR:Herb http://arctos.database.museum/guid/KNWR:Herb:10485		20	United States	Alaska	Soldotna, forest 610m southweast of Nordic Lake, Slikok watershed project site SK22		8/9/2016	2016-08-09	2016-08-09	whole organism	60.44135	-151.08761	10975230		Ascomycota	Chaenothecopsis		Fungi	Chaenothecopsis tasmanica	KNWR-2016.02-Slikok-Herb	SK22
http://creativecommons.org/publicdomain/zero/1.0/	KNWR:Herb:12302	Biatora efflorescens	Lecanorales	Bacidiaceae	Ascomycetes		(same lot as) KNWR:Herb http://arctos.database.museum/guid/KNWR:Herb:10485		20	United States	Alaska	Soldotna, forest 610m southweast of Nordic Lake, Slikok watershed project site SK22		8/9/2016	2016-08-09	2016-08-09	whole organism	60.44135	-151.08761	10975230		Ascomycota	Biatora		Fungi	Biatora efflorescens	KNWR-2016.02-Slikok-Herb	SK22
http://creativecommons.org/publicdomain/zero/1.0/	KNWR:Herb:12304	Calicium viride	Caliciales	Caliciaceae	Ascomycetes		(same lot as) KNWR:Herb http://arctos.database.museum/guid/KNWR:Herb:10485		20	United States	Alaska	Soldotna, forest 610m southweast of Nordic Lake, Slikok watershed project site SK22		8/9/2016	2016-08-09	2016-08-09	whole organism	60.44135	-151.08761	10975230		Ascomycota	Calicium		Fungi	Calicium viride	KNWR-2016.02-Slikok-Herb	SK22
http://creativecommons.org/publicdomain/zero/1.0/	KNWR:Herb:12311	Hypogymnia physodes	Lecanorales	Parmeliaceae	Lecanoromycetes		(same lot as) KNWR:Herb http://arctos.database.museum/guid/KNWR:Herb:10485		20	United States	Alaska	Soldotna, forest 610m southweast of Nordic Lake, Slikok watershed project site SK22		8/9/2016	2016-08-09	2016-08-09	whole organism	60.44135	-151.08761	10975230		Ascomycota	Hypogymnia		Fungi	Hypogymnia physodes	KNWR-2016.02-Slikok-Herb	SK22
http://creativecommons.org/publicdomain/zero/1.0/	KNWR:Herb:12319	Pycnora sorophora	Lecanorales	Lecanoraceae	Lecanoromycetes		(same lot as) KNWR:Herb http://arctos.database.museum/guid/KNWR:Herb:10486		20	United States	Alaska	Soldotna, forest 880m southeast of Nordic Lake, Slikok watershed project site SK23		8/3/2016	2016-08-03	2016-08-03	whole organism	60.44095	-151.0694	10975231		Ascomycota	Pycnora		Fungi	Pycnora sorophora	KNWR-2016.02-Slikok-Herb	SK23
http://creativecommons.org/publicdomain/zero/1.0/	KNWR:Herb:12323	Ramboldia cinnabarina	Lecanorales	Lecanoraceae	Lecanoromycetes		(same lot as) KNWR:Herb http://arctos.database.museum/guid/KNWR:Herb:10486		20	United States	Alaska	Soldotna, forest 880m southeast of Nordic Lake, Slikok watershed project site SK23		8/3/2016	2016-08-03	2016-08-03	whole organism	60.44095	-151.0694	10975231		Ascomycota	Ramboldia		Fungi	Ramboldia cinnabarina	KNWR-2016.02-Slikok-Herb	SK23
http://creativecommons.org/publicdomain/zero/1.0/	KNWR:Herb:12334	Chrysothrix candelaris	Arthoniales	Chrysotrichaceae	Ascomycetes		(same lot as) KNWR:Herb http://arctos.database.museum/guid/KNWR:Herb:10488		20	United States	Alaska	Soldotna, forest 2.3km southeast of Headquarters Lake, Slikok watershed project site SK25		7/21/2016	2016-07-21	2016-07-21	whole organism	60.44016	-151.03297	10975233		Ascomycota	Chrysothrix		Fungi	Chrysothrix candelaris	KNWR-2016.02-Slikok-Herb	SK25
http://creativecommons.org/publicdomain/zero/1.0/	KNWR:Herb:12337	Hypogymnia physodes	Lecanorales	Parmeliaceae	Lecanoromycetes		(same lot as) KNWR:Herb http://arctos.database.museum/guid/KNWR:Herb:10488		20	United States	Alaska	Soldotna, forest 2.3km southeast of Headquarters Lake, Slikok watershed project site SK25		7/21/2016	2016-07-21	2016-07-21	whole organism	60.44016	-151.03297	10975233		Ascomycota	Hypogymnia		Fungi	Hypogymnia physodes	KNWR-2016.02-Slikok-Herb	SK25
http://creativecommons.org/publicdomain/zero/1.0/	KNWR:Herb:12353	Toensbergia leucococca		Sporastatiaceae	Lecanoromycetes		(same lot as) KNWR:Herb http://arctos.database.museum/guid/KNWR:Herb:10488		20	United States	Alaska	Soldotna, forest 2.3km southeast of Headquarters Lake, Slikok watershed project site SK25		7/21/2016	2016-07-21	2016-07-21	whole organism	60.44016	-151.03297	10975233		Ascomycota	Toensbergia		Fungi	Toensbergia leucococca	KNWR-2016.02-Slikok-Herb	SK25
http://creativecommons.org/publicdomain/zero/1.0/	KNWRObs:Bird:405	Regulus calendula	Passeriformes	Regulidae	Aves			Todd Eskelin	38	United States	Alaska	Soldotna, forest 1.5km south of Headquarters Lake, Slikok watershed project site MG39	Variable Circular Plot survey with methods adapted from the Alaska Landbird Monitoring System (ALMS) protocol.	6/15/2016	2016-06-15T15:23:00Z	2016-06-15T15:24:00Z	media	60.44076	-151.06029	11367455	wild caught	Chordata	Regulus	Max error distance was set to distance + 10 m to account for the observer being positioned off of plot center.	Animalia	Regulus calendula	KNWR-2016.01-Slikok-ObsBird	MG39
http://creativecommons.org/publicdomain/zero/1.0/	KNWRObs:Bird:410	Loxia leucoptera	Passeriformes	Fringillidae	Aves			Todd Eskelin	83	United States	Alaska	Soldotna, forest 2km southeast of Headquarters Lake, Slikok watershed project site MG41	Variable Circular Plot survey with methods adapted from the Alaska Landbird Monitoring System (ALMS) protocol.	6/17/2016	2016-06-17T13:46:00Z	2016-06-17T13:47:00Z	media	60.44036	-151.04208	11367460	wild caught	Chordata	Loxia	Max error distance was set to distance + 10 m to account for the observer being positioned off of plot center.	Animalia	Loxia leucoptera	KNWR-2016.01-Slikok-ObsBird	MG41
http://creativecommons.org/publicdomain/zero/1.0/	KNWRObs:Bird:415	Loxia leucoptera	Passeriformes	Fringillidae	Aves			Todd Eskelin	120	United States	Alaska	Soldotna, forest 2km southeast of Headquarters Lake, Slikok watershed project site MG41	Variable Circular Plot survey with methods adapted from the Alaska Landbird Monitoring System (ALMS) protocol.	6/17/2016	2016-06-17T13:46:00Z	2016-06-17T13:47:00Z	media	60.44036	-151.04208	11367465	wild caught	Chordata	Loxia	Max error distance was set to distance + 10 m to account for the observer being positioned off of plot center.	Animalia	Loxia leucoptera	KNWR-2016.01-Slikok-ObsBird	MG41
http://creativecommons.org/publicdomain/zero/1.0/	KNWRObs:Bird:454	Catharus ustulatus	Passeriformes	Turdidae	Aves			Todd Eskelin	110	United States	Alaska	Soldotna, stream 1.7km south-southeast of Headquarters Lake, Slikok watershed project site SK24	Variable Circular Plot survey with methods adapted from the Alaska Landbird Monitoring System (ALMS) protocol.	6/15/2016	2016-06-15T16:09:00Z	2016-06-15T16:10:00Z	media	60.44056	-151.05118	11367501	wild caught	Chordata	Catharus	Max error distance was set to distance + 10 m to account for the observer being positioned off of plot center.	Animalia	Catharus ustulatus	KNWR-2016.01-Slikok-ObsBird	SK24
http://creativecommons.org/publicdomain/zero/1.0/	KNWRObs:Bird:464	Corvus corax	Passeriformes	Corvidae	Aves			Todd Eskelin	85	United States	Alaska	Soldotna, forest 2.3km southeast of Headquarters Lake, Slikok watershed project site SK25	Variable Circular Plot survey with methods adapted from the Alaska Landbird Monitoring System (ALMS) protocol.	6/17/2016	2016-06-17T14:35:00Z	2016-06-17T14:36:00Z	media	60.44016	-151.03297	11367511	wild caught	Chordata	Corvus	Max error distance was set to distance + 10 m to account for the observer being positioned off of plot center.	Animalia	Corvus corax	KNWR-2016.01-Slikok-ObsBird	SK25
http://creativecommons.org/publicdomain/zero/1.0/	KNWRObs:Bird:476	Junco hyemalis hyemalis	Passeriformes	Passerellidae	Aves			Todd Eskelin	100	United States	Alaska	Soldotna, wetland 490m south of Headquarters Lake, Slikok watershed project site SK16	Variable Circular Plot survey with methods adapted from the Alaska Landbird Monitoring System (ALMS) protocol.	6/16/2016	2016-06-16T13:22:00Z	2016-06-16T13:23:00Z	media	60.44989	-151.06859	11367523	wild caught	Chordata	Junco	Max error distance was set to distance + 10 m to account for the observer being positioned off of plot center.	Animalia	Junco hyemalis	KNWR-2016.01-Slikok-ObsBird	SK16
http://creativecommons.org/publicdomain/zero/1.0/	KNWRObs:Bird:478	Setophaga coronata	Passeriformes	Parulidae	Aves			Todd Eskelin	140	United States	Alaska	Soldotna, wetland 490m south of Headquarters Lake, Slikok watershed project site SK16	Variable Circular Plot survey with methods adapted from the Alaska Landbird Monitoring System (ALMS) protocol.	6/16/2016	2016-06-16T13:22:00Z	2016-06-16T13:23:00Z	media	60.44989	-151.06859	11367525	wild caught	Chordata	Setophaga	Max error distance was set to distance + 10 m to account for the observer being positioned off of plot center.	Animalia	Setophaga coronata	KNWR-2016.01-Slikok-ObsBird	SK16
http://creativecommons.org/publicdomain/zero/1.0/	KNWRObs:Bird:480	Regulus calendula	Passeriformes	Regulidae	Aves			Todd Eskelin	140	United States	Alaska	Soldotna, wetland 490m south of Headquarters Lake, Slikok watershed project site SK16	Variable Circular Plot survey with methods adapted from the Alaska Landbird Monitoring System (ALMS) protocol.	6/16/2016	2016-06-16T13:22:00Z	2016-06-16T13:23:00Z	media	60.44989	-151.06859	11367527	wild caught	Chordata	Regulus	Max error distance was set to distance + 10 m to account for the observer being positioned off of plot center.	Animalia	Regulus calendula	KNWR-2016.01-Slikok-ObsBird	SK16
http://creativecommons.org/publicdomain/zero/1.0/	KNWRObs:Bird:482	Picoides dorsalis	Piciformes	Picidae	Aves			Dawn Magness	26	United States	Alaska	Soldotna, forest 940m southeast of Headquarters Lake, Slikok watershed project site SK17	Variable Circular Plot survey with methods adapted from the Alaska Landbird Monitoring System (ALMS) protocol.	6/15/2016	2016-06-15T14:34:00Z	2016-06-15T14:35:00Z	media	60.44949	-151.05037	11367529	wild caught	Chordata	Picoides	Max error distance was set to distance + 10 m to account for the observer being positioned off of plot center.	Animalia	Picoides dorsalis	KNWR-2016.01-Slikok-ObsBird	SK17
http://creativecommons.org/publicdomain/zero/1.0/	KNWRObs:Bird:439	Catharus ustulatus	Passeriformes	Turdidae	Aves			Dawn Magness	60	United States	Alaska	Soldotna, Ski Hill Road, forest 840m northeast of Headquarters Lake, Slikok watershed project site SK04	Variable Circular Plot survey with methods adapted from the Alaska Landbird Monitoring System (ALMS) protocol.	6/14/2016	2016-06-14T14:09:00Z	2016-06-14T14:10:00Z	media	60.46735	-151.04875	11367487	wild caught	Chordata	Catharus	Max error distance was set to distance + 10 m to account for the observer being positioned off of plot center.	Animalia	Catharus ustulatus	KNWR-2016.01-Slikok-ObsBird	SK04
http://creativecommons.org/publicdomain/zero/1.0/	KNWRObs:Bird:441	Dryobates pubescens	Piciformes	Picidae	Aves			Dawn Magness	50	United States	Alaska	Soldotna, Ski Hill Road, forest 840m northeast of Headquarters Lake, Slikok watershed project site SK04	Variable Circular Plot survey with methods adapted from the Alaska Landbird Monitoring System (ALMS) protocol.	6/14/2016	2016-06-14T14:09:00Z	2016-06-14T14:10:00Z	media	60.46735	-151.04875	11367488	wild caught	Chordata	Dryobates	Max error distance was set to distance + 10 m to account for the observer being positioned off of plot center.	Animalia	Dryobates pubescens	KNWR-2016.01-Slikok-ObsBird	SK04
http://creativecommons.org/publicdomain/zero/1.0/	KNWRObs:Bird:497	Loxia leucoptera	Passeriformes	Fringillidae	Aves			Todd Eskelin	71	United States	Alaska	Soldotna, forest 610m southweast of Nordic Lake, Slikok watershed project site SK22	Variable Circular Plot survey with methods adapted from the Alaska Landbird Monitoring System (ALMS) protocol.	6/16/2016	2016-06-16T13:05:00Z	2016-06-16T13:06:00Z	media	60.44135	-151.08761	11367540	wild caught	Chordata	Loxia	Max error distance was set to distance + 10 m to account for the observer being positioned off of plot center.	Animalia	Loxia leucoptera	KNWR-2016.01-Slikok-ObsBird	SK22
http://creativecommons.org/publicdomain/zero/1.0/	KNWRObs:Bird:499	Regulus calendula	Passeriformes	Regulidae	Aves			Todd Eskelin	52	United States	Alaska	Soldotna, forest 610m southweast of Nordic Lake, Slikok watershed project site SK22	Variable Circular Plot survey with methods adapted from the Alaska Landbird Monitoring System (ALMS) protocol.	6/16/2016	2016-06-16T13:05:00Z	2016-06-16T13:06:00Z	media	60.44135	-151.08761	11367542	wild caught	Chordata	Regulus	Max error distance was set to distance + 10 m to account for the observer being positioned off of plot center.	Animalia	Regulus calendula	KNWR-2016.01-Slikok-ObsBird	SK22
http://creativecommons.org/publicdomain/zero/1.0/	KNWRObs:Bird:504	Loxia leucoptera	Passeriformes	Fringillidae	Aves			Todd Eskelin	72	United States	Alaska	Soldotna, forest 610m southweast of Nordic Lake, Slikok watershed project site SK22	Variable Circular Plot survey with methods adapted from the Alaska Landbird Monitoring System (ALMS) protocol.	6/16/2016	2016-06-16T13:05:00Z	2016-06-16T13:06:00Z	media	60.44135	-151.08761	11367547	wild caught	Chordata	Loxia	Max error distance was set to distance + 10 m to account for the observer being positioned off of plot center.	Animalia	Loxia leucoptera	KNWR-2016.01-Slikok-ObsBird	SK22
http://creativecommons.org/publicdomain/zero/1.0/	KNWRObs:Bird:511	Loxia leucoptera	Passeriformes	Fringillidae	Aves			Todd Eskelin	120	United States	Alaska	Soldotna, forest 880m southeast of Nordic Lake, Slikok watershed project site SK23	Variable Circular Plot survey with methods adapted from the Alaska Landbird Monitoring System (ALMS) protocol.	6/15/2016	2016-06-15T14:38:00Z	2016-06-15T14:39:00Z	media	60.44095	-151.0694	11367554	wild caught	Chordata	Loxia	Max error distance was set to distance + 10 m to account for the observer being positioned off of plot center.	Animalia	Loxia leucoptera	KNWR-2016.01-Slikok-ObsBird	SK23
http://creativecommons.org/publicdomain/zero/1.0/	KNWRObs:Bird:33	Poecile atricapillus	Passeriformes	Paridae	Aves			Dawn Magness	25	United States	Alaska	Soldotna, Ski Hill Road, Centennial Trail north of Headquarters Lake, Slikok watershed project site MG02	Variable Circular Plot survey with methods adapted from the Alaska Landbird Monitoring System (ALMS) protocol.	6/14/2016	2016-06-14T13:21:00Z	2016-06-14T13:22:00Z	media	60.46755	-151.05787	11366626	wild caught	Chordata	Poecile	Max error distance was set to distance + 10 m to account for the observer being positioned off of plot center.	Animalia	Poecile atricapillus	KNWR-2016.01-Slikok-ObsBird	MG02
http://creativecommons.org/publicdomain/zero/1.0/	KNWRObs:Bird:39	Perisoreus canadensis	Passeriformes	Corvidae	Aves			Todd Eskelin	67	United States	Alaska	Soldotna, 100m west of Sterling Highway and 1.3km from intersection with Funny River Road, Slikok watershed project site MG04	Variable Circular Plot survey with methods adapted from the Alaska Landbird Monitoring System (ALMS) protocol.	6/14/2016	2016-06-14T13:15:00Z	2016-06-14T13:16:00Z	media	60.46387	-151.09473	11367113	wild caught	Chordata	Perisoreus	Max error distance was set to distance + 10 m to account for the observer being positioned off of plot center.	Animalia	Perisoreus canadensis	KNWR-2016.01-Slikok-ObsBird	MG04
http://creativecommons.org/publicdomain/zero/1.0/	KNWRObs:Bird:53	Catharus ustulatus	Passeriformes	Turdidae	Aves			Todd Eskelin	96	United States	Alaska	Soldotna, Ski Hill Road, Slikok watershed project site MG05	Variable Circular Plot survey with methods adapted from the Alaska Landbird Monitoring System (ALMS) protocol.	6/14/2016	2016-06-14T14:09:00Z	2016-06-14T14:10:00Z	media	60.46368	-151.08561	11367126	wild caught	Chordata	Catharus	Max error distance was set to distance + 10 m to account for the observer being positioned off of plot center.	Animalia	Catharus ustulatus	KNWR-2016.01-Slikok-ObsBird	MG05
http://creativecommons.org/publicdomain/zero/1.0/	KNWRObs:Bird:69	Junco hyemalis hyemalis	Passeriformes	Passerellidae	Aves			Dawn Magness	31	United States	Alaska	Soldotna, Ski Hill Road, ski trails between new visitor center and old septic leach field, Slikok watershed project site MG06	Variable Circular Plot survey with methods adapted from the Alaska Landbird Monitoring System (ALMS) protocol.	6/17/2016	2016-06-17T16:37:00Z	2016-06-17T16:38:00Z	media	60.46348	-151.0765	11367138	wild caught	Chordata	Junco	Max error distance was set to distance + 10 m to account for the observer being positioned off of plot center.	Animalia	Junco hyemalis	KNWR-2016.01-Slikok-ObsBird	MG06
http://creativecommons.org/publicdomain/zero/1.0/	KNWRObs:Bird:59	Sitta canadensis	Passeriformes	Sittidae	Aves			Todd Eskelin	84	United States	Alaska	Soldotna, Ski Hill Road, Slikok watershed project site MG05	Variable Circular Plot survey with methods adapted from the Alaska Landbird Monitoring System (ALMS) protocol.	6/14/2016	2016-06-14T14:09:00Z	2016-06-14T14:10:00Z	media	60.46368	-151.08561	11367132	wild caught	Chordata	Sitta	Max error distance was set to distance + 10 m to account for the observer being positioned off of plot center.	Animalia	Sitta canadensis	KNWR-2016.01-Slikok-ObsBird	MG05
http://creativecommons.org/publicdomain/zero/1.0/	KNWRObs:Bird:62	Regulus calendula	Passeriformes	Regulidae	Aves			Todd Eskelin	75	United States	Alaska	Soldotna, Ski Hill Road, Slikok watershed project site MG05	Variable Circular Plot survey with methods adapted from the Alaska Landbird Monitoring System (ALMS) protocol.	6/14/2016	2016-06-14T14:09:00Z	2016-06-14T14:10:00Z	media	60.46368	-151.08561	11367135	wild caught	Chordata	Regulus	Max error distance was set to distance + 10 m to account for the observer being positioned off of plot center.	Animalia	Regulus calendula	KNWR-2016.01-Slikok-ObsBird	MG05
http://creativecommons.org/publicdomain/zero/1.0/	KNWRObs:Bird:82	Melospiza lincolnii	Passeriformes	Passerellidae	Aves			Dawn Magness	15	United States	Alaska	Soldotna, muskeg 0.6km northeast of Headquarters Lake, Slikok watershed project site MG09	Variable Circular Plot survey with methods adapted from the Alaska Landbird Monitoring System (ALMS) protocol.	6/14/2016	2016-06-14T14:50:00Z	2016-06-14T14:51:00Z	media	60.46289	-151.04916	11367153	wild caught	Chordata	Melospiza	Max error distance was set to distance + 10 m to account for the observer being positioned off of plot center.	Animalia	Melospiza lincolnii	KNWR-2016.01-Slikok-ObsBird	MG09
http://creativecommons.org/publicdomain/zero/1.0/	KNWRObs:Herb:81	Carex rotundata	Poales	Cyperaceae	Liliopsida			Matt Bowser	20	United States	Alaska	Soldotna, muskeg 120m northeast of Headquarters Lake, Slikok watershed project site MG08		7/22/2016	2016-07-22	2016-07-22	media	60.46309	-151.05827	10975199		Tracheophyta	Carex		Plantae	Carex rotundata	KNWR-2016.01-Slikok-ObsHerb	MG08
http://creativecommons.org/publicdomain/zero/1.0/	KNWRObs:Herb:15	Calamagrostis canadensis	Poales	Poaceae	Liliopsida			Matt Bowser	20	United States	Alaska	Soldotna, Ski Hill Road, Slikok watershed project site SK08		7/22/2016	2016-07-22	2016-07-22	media	60.45921	-151.08601	10975226		Tracheophyta	Calamagrostis		Plantae	Calamagrostis canadensis	KNWR-2016.01-Slikok-ObsHerb	SK08
http://creativecommons.org/publicdomain/zero/1.0/	KNWRObs:Herb:18	Dryopteris expansa	Polypodiales	Dryopteridaceae	Filicopsida			Matt Bowser	20	United States	Alaska	Soldotna, Ski Hill Road, Slikok watershed project site SK08		7/22/2016	2016-07-22	2016-07-22	media	60.45921	-151.08601	10975226		Tracheophyta	Dryopteris		Plantae	Dryopteris expansa	KNWR-2016.01-Slikok-ObsHerb	SK08
http://creativecommons.org/publicdomain/zero/1.0/	KNWRObs:Herb:28	Empetrum nigrum	Ericales	Empetraceae	Magnoliopsida			Matt Bowser	20	United States	Alaska	Soldotna, woods on north shore of Headquarters Lake 200m east of Keen Eye Trail floating dock, Slikok watershed project site MG07		8/1/2016	2016-08-01	2016-08-01	media	60.46328	-151.06739	10975198		Tracheophyta	Empetrum		Plantae	Empetrum nigrum	KNWR-2016.01-Slikok-ObsHerb	MG07
http://creativecommons.org/publicdomain/zero/1.0/	KNWRObs:Herb:35	Picea mariana	Pinales, Coniferales	Pinaceae	Coniferopsida, Pinopsida			Matt Bowser	20	United States	Alaska	Soldotna, woods on north shore of Headquarters Lake 200m east of Keen Eye Trail floating dock, Slikok watershed project site MG07		8/1/2016	2016-08-01	2016-08-01	media	60.46328	-151.06739	10975198		Tracheophyta	Picea		Plantae	Picea mariana	KNWR-2016.01-Slikok-ObsHerb	MG07
http://creativecommons.org/publicdomain/zero/1.0/	KNWRObs:Herb:50	Rosa acicularis	Rosales	Rosaceae	Magnoliopsida			Matt Bowser	20	United States	Alaska	Soldotna, forest 1km south of Headquarters Lake, Slikok watershed project site MG32		7/29/2016	2016-07-29	2016-07-29	media	60.44522	-151.05989	10975217		Tracheophyta	Rosa		Plantae	Rosa acicularis	KNWR-2016.01-Slikok-ObsHerb	MG32
http://creativecommons.org/publicdomain/zero/1.0/	KNWRObs:Bird:90	Catharus ustulatus	Passeriformes	Turdidae	Aves			Todd Eskelin	55	United States	Alaska	Soldotna, 40m east of Sterling Highway 480m northeast of intersection with south end of Ski Hill Road, Slikok watershed project site MG10	Variable Circular Plot survey with methods adapted from the Alaska Landbird Monitoring System (ALMS) protocol.	6/14/2016	2016-06-14T12:24:00Z	2016-06-14T12:25:00Z	media	60.45941	-151.09513	11367160	wild caught	Chordata	Catharus	Max error distance was set to distance + 10 m to account for the observer being positioned off of plot center.	Animalia	Catharus ustulatus	KNWR-2016.01-Slikok-ObsBird	MG10
http://creativecommons.org/publicdomain/zero/1.0/	KNWRObs:Bird:104	Regulus calendula	Passeriformes	Regulidae	Aves			Todd Eskelin	98	United States	Alaska	Soldotna, Ski Hill Road, off of Howling Hill Trail, Slikok watershed project site MG17	Variable Circular Plot survey with methods adapted from the Alaska Landbird Monitoring System (ALMS) protocol.	6/14/2016	2016-06-14T15:33:00Z	2016-06-14T15:34:00Z	media	60.45475	-151.08641	11367175	wild caught	Chordata	Regulus	Max error distance was set to distance + 10 m to account for the observer being positioned off of plot center.	Animalia	Regulus calendula	KNWR-2016.01-Slikok-ObsBird	MG17
http://creativecommons.org/publicdomain/zero/1.0/	KNWRObs:Bird:109	Certhia americana	Passeriformes	Certhiidae	Aves			Todd Eskelin	37	United States	Alaska	Soldotna, Ski Hill Road, off of Howling Hill Trail, Slikok watershed project site MG17	Variable Circular Plot survey with methods adapted from the Alaska Landbird Monitoring System (ALMS) protocol.	6/14/2016	2016-06-14T15:33:00Z	2016-06-14T15:34:00Z	media	60.45475	-151.08641	11367180	wild caught	Chordata	Certhia	Max error distance was set to distance + 10 m to account for the observer being positioned off of plot center.	Animalia	Certhia americana	KNWR-2016.01-Slikok-ObsBird	MG17
http://creativecommons.org/publicdomain/zero/1.0/	KNWRObs:Bird:129	Tachycineta bicolor	Passeriformes	Hirundinidae	Aves			Todd Eskelin	85	United States	Alaska	Soldotna, in wetland 510m southwest of Headquarters Lake, Slikok watershed project site MG18	Variable Circular Plot survey with methods adapted from the Alaska Landbird Monitoring System (ALMS) protocol.	6/16/2016	2016-06-16T15:18:00Z	2016-06-16T15:19:00Z	media	60.45455	-151.0773	11367200	wild caught	Chordata	Tachycineta	Max error distance was set to distance + 10 m to account for the observer being positioned off of plot center.	Animalia	Tachycineta bicolor	KNWR-2016.01-Slikok-ObsBird	MG18
http://creativecommons.org/publicdomain/zero/1.0/	KNWRObs:Bird:145	Junco hyemalis hyemalis	Passeriformes	Passerellidae	Aves			Dawn Magness	130	United States	Alaska	Soldotna, in wetland 400m south-southwest of floatplane dock on Headquarters Lake, Slikok watershed project site MG12	Variable Circular Plot survey with methods adapted from the Alaska Landbird Monitoring System (ALMS) protocol.	6/17/2016	2016-06-17T16:01:00Z	2016-06-17T16:02:00Z	media	60.45902	-151.0769	11367216	wild caught	Chordata	Junco	Max error distance was set to distance + 10 m to account for the observer being positioned off of plot center.	Animalia	Junco hyemalis	KNWR-2016.01-Slikok-ObsBird	MG12
http://creativecommons.org/publicdomain/zero/1.0/	KNWRObs:Bird:102	Larus argentatus x Larus hyperboreus	Charadriiformes	Laridae	Aves			Todd Eskelin	150	United States	Alaska	Soldotna, Ski Hill Road, off of Howling Hill Trail, Slikok watershed project site MG17	Variable Circular Plot survey with methods adapted from the Alaska Landbird Monitoring System (ALMS) protocol.	6/14/2016	2016-06-14T15:33:00Z	2016-06-14T15:34:00Z	media	60.45475	-151.08641	11367173	wild caught	Chordata	Larus	Max error distance was set to distance + 10 m to account for the observer being positioned off of plot center.	Animalia	Larus hyperboreus, Larus argentatus	KNWR-2016.01-Slikok-ObsBird	MG17
http://creativecommons.org/publicdomain/zero/1.0/	KNWRObs:Bird:170	Loxia leucoptera	Passeriformes	Fringillidae	Aves			Dawn Magness	55	United States	Alaska	Soldotna, 210m east-southeast of intersection of Sterling Highway and south end of Ski Hill Road, Slikok watershed project site MG16	Variable Circular Plot survey with methods adapted from the Alaska Landbird Monitoring System (ALMS) protocol.	6/17/2016	2016-06-17T15:01:00Z	2016-06-17T15:02:00Z	media	60.45494	-151.09552	11367237	wild caught	Chordata	Loxia	Max error distance was set to distance + 10 m to account for the observer being positioned off of plot center.	Animalia	Loxia leucoptera	KNWR-2016.01-Slikok-ObsBird	MG16
http://creativecommons.org/publicdomain/zero/1.0/	KNWRObs:Bird:179	Tringa melanoleuca	Charadriiformes	Scolopacidae	Aves			Todd Eskelin	190	United States	Alaska	Soldotna, shore of southeastern bay of Headquarters Lake, Slikok watershed project site MG19	Variable Circular Plot survey with methods adapted from the Alaska Landbird Monitoring System (ALMS) protocol.	6/16/2016	2016-06-16T12:24:00Z	2016-06-16T12:25:00Z	media	60.45435	-151.06819	11367248	wild caught	Chordata	Tringa	Max error distance was set to distance + 10 m to account for the observer being positioned off of plot center.	Animalia	Tringa melanoleuca	KNWR-2016.01-Slikok-ObsBird	MG19
http://creativecommons.org/publicdomain/zero/1.0/	KNWRObs:Bird:214	Pica hudsonia	Passeriformes	Corvidae	Aves			Dawn Magness	100	United States	Alaska	Soldotna, forest 180m southwest of Nordic Lake, Slikok watershed project site MG29	Variable Circular Plot survey with methods adapted from the Alaska Landbird Monitoring System (ALMS) protocol.	6/17/2016	2016-06-17T13:22:00Z	2016-06-17T13:23:00Z	media	60.44581	-151.08721	11367282	wild caught	Chordata	Pica	Max error distance was set to distance + 10 m to account for the observer being positioned off of plot center.	Animalia	Pica hudsonia	KNWR-2016.01-Slikok-ObsBird	MG29
http://creativecommons.org/publicdomain/zero/1.0/	KNWRObs:Bird:220	Empidonax alnorum	Passeriformes	Tyrannidae	Aves			Dawn Magness	58	United States	Alaska	Soldotna, forest 720km southeast of Headquarters Lake, Slikok watershed project site MG21	Variable Circular Plot survey with methods adapted from the Alaska Landbird Monitoring System (ALMS) protocol.	6/15/2016	2016-06-15T13:35:00Z	2016-06-15T13:36:00Z	media	60.45396	-151.04997	11367287	wild caught	Chordata	Empidonax	Max error distance was set to distance + 10 m to account for the observer being positioned off of plot center.	Animalia	Empidonax alnorum	KNWR-2016.01-Slikok-ObsBird	MG21
http://creativecommons.org/publicdomain/zero/1.0/	KNWRObs:Bird:233	Setophaga coronata	Passeriformes	Parulidae	Aves			Todd Eskelin	62	United States	Alaska	Soldotna, muskeg 250m east of Arc Lake, Slikok watershed project site MG22	Variable Circular Plot survey with methods adapted from the Alaska Landbird Monitoring System (ALMS) protocol.	6/14/2016	2016-06-14T16:21:00Z	2016-06-14T16:22:00Z	media	60.45048	-151.09592	11367301	wild caught	Chordata	Setophaga	Max error distance was set to distance + 10 m to account for the observer being positioned off of plot center.	Animalia	Setophaga coronata	KNWR-2016.01-Slikok-ObsBird	MG22
http://creativecommons.org/publicdomain/zero/1.0/	KNWRObs:Bird:235	Sitta canadensis	Passeriformes	Sittidae	Aves			Todd Eskelin	61	United States	Alaska	Soldotna, muskeg 250m east of Arc Lake, Slikok watershed project site MG22	Variable Circular Plot survey with methods adapted from the Alaska Landbird Monitoring System (ALMS) protocol.	6/14/2016	2016-06-14T16:21:00Z	2016-06-14T16:22:00Z	media	60.45048	-151.09592	11367303	wild caught	Chordata	Sitta	Max error distance was set to distance + 10 m to account for the observer being positioned off of plot center.	Animalia	Sitta canadensis	KNWR-2016.01-Slikok-ObsBird	MG22
http://creativecommons.org/publicdomain/zero/1.0/	KNWRObs:Bird:267	Regulus calendula	Passeriformes	Regulidae	Aves			Dawn Magness	45	United States	Alaska	Soldotna, forest 380m southeast of Arc Lake, Slikok watershed project site MG28	Variable Circular Plot survey with methods adapted from the Alaska Landbird Monitoring System (ALMS) protocol.	6/17/2016	2016-06-17T14:06:00Z	2016-06-17T14:07:00Z	media	60.44601	-151.09632	11367328	wild caught	Chordata	Regulus	Max error distance was set to distance + 10 m to account for the observer being positioned off of plot center.	Animalia	Regulus calendula	KNWR-2016.01-Slikok-ObsBird	MG28
http://creativecommons.org/publicdomain/zero/1.0/	KNWRObs:Bird:269	Setophaga coronata	Passeriformes	Parulidae	Aves			Dawn Magness	14	United States	Alaska	Soldotna, forest 380m southeast of Arc Lake, Slikok watershed project site MG28	Variable Circular Plot survey with methods adapted from the Alaska Landbird Monitoring System (ALMS) protocol.	6/17/2016	2016-06-17T14:06:00Z	2016-06-17T14:07:00Z	media	60.44601	-151.09632	11367330	wild caught	Chordata	Setophaga	Max error distance was set to distance + 10 m to account for the observer being positioned off of plot center.	Animalia	Setophaga coronata	KNWR-2016.01-Slikok-ObsBird	MG28
http://creativecommons.org/publicdomain/zero/1.0/	KNWRObs:Bird:294	Regulus calendula	Passeriformes	Regulidae	Aves			Dawn Magness	25	United States	Alaska	Soldotna, forest 980m south of Headquarters Lake, Slikok watershed project site MG31	Variable Circular Plot survey with methods adapted from the Alaska Landbird Monitoring System (ALMS) protocol.	6/16/2016	2016-06-16T13:17:00Z	2016-06-16T13:18:00Z	media	60.44542	-151.069	11367352	wild caught	Chordata	Regulus	Max error distance was set to distance + 10 m to account for the observer being positioned off of plot center.	Animalia	Regulus calendula	KNWR-2016.01-Slikok-ObsBird	MG31
http://creativecommons.org/publicdomain/zero/1.0/	KNWRObs:Bird:310	Poecile hudsonicus	Passeriformes	Paridae	Aves			Todd Eskelin	48	United States	Alaska	Soldotna, muskeg 600m south of Nordic Lake, Slikok watershed project site MG37	Variable Circular Plot survey with methods adapted from the Alaska Landbird Monitoring System (ALMS) protocol.	6/15/2016	2016-06-15T13:54:00Z	2016-06-15T13:55:00Z	media	60.44115	-151.07851	11367368	wild caught	Chordata	Poecile	Max error distance was set to distance + 10 m to account for the observer being positioned off of plot center.	Animalia	Poecile hudsonicus	KNWR-2016.01-Slikok-ObsBird	MG37
http://creativecommons.org/publicdomain/zero/1.0/	KNWRObs:Bird:313	Zonotrichia leucophrys	Passeriformes	Passerellidae	Aves			Todd Eskelin	74	United States	Alaska	Soldotna, muskeg 600m south of Nordic Lake, Slikok watershed project site MG37	Variable Circular Plot survey with methods adapted from the Alaska Landbird Monitoring System (ALMS) protocol.	6/15/2016	2016-06-15T13:54:00Z	2016-06-15T13:55:00Z	media	60.44115	-151.07851	11367370	wild caught	Chordata	Zonotrichia	Max error distance was set to distance + 10 m to account for the observer being positioned off of plot center.	Animalia	Zonotrichia leucophrys	KNWR-2016.01-Slikok-ObsBird	MG37
http://creativecommons.org/publicdomain/zero/1.0/	KNWRObs:Bird:314	Regulus calendula	Passeriformes	Regulidae	Aves			Todd Eskelin	49	United States	Alaska	Soldotna, muskeg 600m south of Nordic Lake, Slikok watershed project site MG37	Variable Circular Plot survey with methods adapted from the Alaska Landbird Monitoring System (ALMS) protocol.	6/15/2016	2016-06-15T13:54:00Z	2016-06-15T13:55:00Z	media	60.44115	-151.07851	11367371	wild caught	Chordata	Regulus	Max error distance was set to distance + 10 m to account for the observer being positioned off of plot center.	Animalia	Regulus calendula	KNWR-2016.01-Slikok-ObsBird	MG37
http://creativecommons.org/publicdomain/zero/1.0/	KNWRObs:Bird:317	Junco hyemalis hyemalis	Passeriformes	Passerellidae	Aves			Todd Eskelin	44	United States	Alaska	Soldotna, muskeg 600m south of Nordic Lake, Slikok watershed project site MG37	Variable Circular Plot survey with methods adapted from the Alaska Landbird Monitoring System (ALMS) protocol.	6/15/2016	2016-06-15T13:54:00Z	2016-06-15T13:55:00Z	media	60.44115	-151.07851	11367374	wild caught	Chordata	Junco	Max error distance was set to distance + 10 m to account for the observer being positioned off of plot center.	Animalia	Junco hyemalis	KNWR-2016.01-Slikok-ObsBird	MG37
http://creativecommons.org/publicdomain/zero/1.0/	KNWRObs:Bird:338	Empidonax alnorum	Passeriformes	Tyrannidae	Aves			Dawn Magness	28	United States	Alaska	Soldotna, forest 1km south of Headquarters Lake, Slikok watershed project site MG32	Variable Circular Plot survey with methods adapted from the Alaska Landbird Monitoring System (ALMS) protocol.	6/16/2016	2016-06-16T14:07:00Z	2016-06-16T14:08:00Z	media	60.44522	-151.05989	11367393	wild caught	Chordata	Empidonax	Max error distance was set to distance + 10 m to account for the observer being positioned off of plot center.	Animalia	Empidonax alnorum	KNWR-2016.01-Slikok-ObsBird	MG32
http://creativecommons.org/publicdomain/zero/1.0/	KNWRObs:Bird:343	Poecile atricapillus	Passeriformes	Paridae	Aves			Dawn Magness	20	United States	Alaska	Soldotna, forest 1km south of Headquarters Lake, Slikok watershed project site MG32	Variable Circular Plot survey with methods adapted from the Alaska Landbird Monitoring System (ALMS) protocol.	6/16/2016	2016-06-16T14:07:00Z	2016-06-16T14:08:00Z	media	60.44522	-151.05989	11367395	wild caught	Chordata	Poecile	Max error distance was set to distance + 10 m to account for the observer being positioned off of plot center.	Animalia	Poecile atricapillus	KNWR-2016.01-Slikok-ObsBird	MG32
http://creativecommons.org/publicdomain/zero/1.0/	KNWRObs:Bird:384	Loxia leucoptera	Passeriformes	Fringillidae	Aves			Todd Eskelin	67	United States	Alaska	Soldotna, Ski Hill Road, Slikok watershed project site SK08	Variable Circular Plot survey with methods adapted from the Alaska Landbird Monitoring System (ALMS) protocol.	6/14/2016	2016-06-14T14:51:00Z	2016-06-14T14:52:00Z	media	60.45921	-151.08601	11367435	wild caught	Chordata	Loxia	Max error distance was set to distance + 10 m to account for the observer being positioned off of plot center.	Animalia	Loxia leucoptera	KNWR-2016.01-Slikok-ObsBird	SK08
http://creativecommons.org/publicdomain/zero/1.0/	KNWRObs:Herb:54	Viburnum edule	Dipsacales	Caprifoliaceae	Magnoliopsida			Matt Bowser	20	United States	Alaska	Soldotna, forest 1km south of Headquarters Lake, Slikok watershed project site MG32		7/29/2016	2016-07-29	2016-07-29	media	60.44522	-151.05989	10975217		Tracheophyta	Viburnum		Plantae	Viburnum edule	KNWR-2016.01-Slikok-ObsHerb	MG32
http://creativecommons.org/publicdomain/zero/1.0/	KNWRObs:Herb:58	Chamerion angustifolium	Myrtales	Onagraceae	Magnoliopsida			Matt Bowser	20	United States	Alaska	Soldotna, forest 1.3km southeast of Headquarters Lake, Slikok watershed project site MG33		7/21/2016	2016-07-21	2016-07-21	media	60.44502	-151.05078	10975218		Tracheophyta	Chamerion		Plantae	Chamerion angustifolium	KNWR-2016.01-Slikok-ObsHerb	MG33
http://creativecommons.org/publicdomain/zero/1.0/	KNWRObs:Herb:67	Peltigera	Lecanorales	Peltigeraceae	Lecanoromycetes			Matt Bowser	20	United States	Alaska	Soldotna, Ski Hill Road, Slikok watershed project site SK08		7/22/2016	2016-07-22	2016-07-22	media	60.45921	-151.08601	10975226		Ascomycota	Peltigera		Fungi		KNWR-2016.01-Slikok-ObsHerb	SK08
http://creativecommons.org/publicdomain/zero/1.0/	KNWRObs:Herb:72	Ptilium crista-castrensis	Hypnales	Ptiliidae	Bryopsida			Matt Bowser	20	United States	Alaska	Soldotna, Ski Hill Road, Slikok watershed project site SK08		7/22/2016	2016-07-22	2016-07-22	media	60.45921	-151.08601	10975226		Bryophyta	Ptilium		Plantae	Ptilium crista-castrensis	KNWR-2016.01-Slikok-ObsHerb	SK08
http://creativecommons.org/publicdomain/zero/1.0/	KNWRObs:Herb:75	Sphagnum	Sphagnales	Sphagnaceae	Sphagnopsida			Matt Bowser	20	United States	Alaska	Soldotna, woods on north shore of Headquarters Lake 200m east of Keen Eye Trail floating dock, Slikok watershed project site MG07		8/1/2016	2016-08-01	2016-08-01	media	60.46328	-151.06739	10975198		Bryophyta	Sphagnum		Plantae		KNWR-2016.01-Slikok-ObsHerb	MG07
http://creativecommons.org/publicdomain/zero/1.0/	KNWRObs:Herb:76	Vaccinium oxycoccos	Ericales	Ericaceae	Magnoliopsida			Matt Bowser	20	United States	Alaska	Soldotna, woods on north shore of Headquarters Lake 200m east of Keen Eye Trail floating dock, Slikok watershed project site MG07		8/1/2016	2016-08-01	2016-08-01	media	60.46328	-151.06739	10975198		Tracheophyta	Vaccinium		Plantae	Vaccinium oxycoccos	KNWR-2016.01-Slikok-ObsHerb	MG07
http://creativecommons.org/publicdomain/zero/1.0/	KNWRObs:Herb:95	Ptilium crista-castrensis	Hypnales	Ptiliidae	Bryopsida			Matt Bowser	20	United States	Alaska	Soldotna, forest 720km southeast of Headquarters Lake, Slikok watershed project site MG21		7/20/2016	2016-07-20	2016-07-20	media	60.45396	-151.04997	10975209		Bryophyta	Ptilium		Plantae	Ptilium crista-castrensis	KNWR-2016.01-Slikok-ObsHerb	MG21
http://creativecommons.org/publicdomain/zero/1.0/	KNWRObs:Herb:96	Listera cordata	Asparagales	Orchidaceae	Liliopsida			Matt Bowser	20	United States	Alaska	Soldotna, forest 720km southeast of Headquarters Lake, Slikok watershed project site MG21		7/20/2016	2016-07-20	2016-07-20	media	60.45396	-151.04997	10975209		Tracheophyta	Listera		Plantae	Listera cordata	KNWR-2016.01-Slikok-ObsHerb	MG21
http://creativecommons.org/publicdomain/zero/1.0/	KNWRObs:Herb:98	Rubus pedatus	Rosales	Rosaceae	Magnoliopsida			Matt Bowser	20	United States	Alaska	Soldotna, forest 720km southeast of Headquarters Lake, Slikok watershed project site MG21		7/20/2016	2016-07-20	2016-07-20	media	60.45396	-151.04997	10975209		Tracheophyta	Rubus		Plantae	Rubus pedatus	KNWR-2016.01-Slikok-ObsHerb	MG21
http://creativecommons.org/publicdomain/zero/1.0/	KNWRObs:Herb:117	Agrostis scabra	Poales	Poaceae	Liliopsida			Matt Bowser	20	United States	Alaska	Soldotna, Ski Hill Road, Nordic View Trail by Nordic Lake, Slikok watershed project site SK15		8/9/2016	2016-08-09	2016-08-09	media	60.45028	-151.08681	10975227		Tracheophyta	Agrostis		Plantae	Agrostis scabra	KNWR-2016.01-Slikok-ObsHerb	SK15
http://creativecommons.org/publicdomain/zero/1.0/	KNWRObs:Herb:124	Empetrum nigrum	Ericales	Empetraceae	Magnoliopsida			Matt Bowser	20	United States	Alaska	Soldotna, Ski Hill Road, Nordic View Trail by Nordic Lake, Slikok watershed project site SK15		8/9/2016	2016-08-09	2016-08-09	media	60.45028	-151.08681	10975227		Tracheophyta	Empetrum		Plantae	Empetrum nigrum	KNWR-2016.01-Slikok-ObsHerb	SK15
http://creativecommons.org/publicdomain/zero/1.0/	KNWRObs:Herb:129	Rubus chamaemorus	Rosales	Rosaceae	Magnoliopsida			Matt Bowser	20	United States	Alaska	Soldotna, muskeg 120m northeast of Headquarters Lake, Slikok watershed project site MG08		7/22/2016	2016-07-22	2016-07-22	media	60.46309	-151.05827	10975199		Tracheophyta	Rubus		Plantae	Rubus chamaemorus	KNWR-2016.01-Slikok-ObsHerb	MG08
http://creativecommons.org/publicdomain/zero/1.0/	KNWRObs:Herb:134	Vaccinium vitis-idaea	Ericales	Ericaceae	Magnoliopsida			Matt Bowser	20	United States	Alaska	Soldotna, muskeg 120m northeast of Headquarters Lake, Slikok watershed project site MG08		7/22/2016	2016-07-22	2016-07-22	media	60.46309	-151.05827	10975199		Tracheophyta	Vaccinium		Plantae	Vaccinium vitis-idaea	KNWR-2016.01-Slikok-ObsHerb	MG08
http://creativecommons.org/publicdomain/zero/1.0/	KNWRObs:Herb:135	Andromeda polifolia	Ericales	Ericaceae	Magnoliopsida			Matt Bowser	20	United States	Alaska	Soldotna, muskeg 0.6km northeast of Headquarters Lake, Slikok watershed project site MG09		7/19/2016	2016-07-19	2016-07-19	media	60.46289	-151.04916	10975200		Tracheophyta	Andromeda		Plantae	Andromeda polifolia	KNWR-2016.01-Slikok-ObsHerb	MG09
http://creativecommons.org/publicdomain/zero/1.0/	KNWRObs:Herb:145	Streptopus amplexifolius	Liliales	Liliaceae	Liliopsida			Matt Bowser	20	United States	Alaska	Soldotna, forest 720km southeast of Headquarters Lake, Slikok watershed project site MG21		7/20/2016	2016-07-20	2016-07-20	media	60.45396	-151.04997	10975209		Tracheophyta	Streptopus		Plantae	Streptopus amplexifolius	KNWR-2016.01-Slikok-ObsHerb	MG21
http://creativecommons.org/publicdomain/zero/1.0/	KNWRObs:Herb:149	Pleurozium schreberi	Hypnales	Hylocomiaceae	Bryopsida			Matt Bowser	20	United States	Alaska	Soldotna, forest 1.3km southeast of Headquarters Lake, Slikok watershed project site MG33		7/21/2016	2016-07-21	2016-07-21	media	60.44502	-151.05078	10975218		Bryophyta	Pleurozium		Plantae	Pleurozium schreberi	KNWR-2016.01-Slikok-ObsHerb	MG33
http://creativecommons.org/publicdomain/zero/1.0/	KNWRObs:Herb:158	Vaccinium vitis-idaea	Ericales	Ericaceae	Magnoliopsida			Matt Bowser	20	United States	Alaska	Soldotna, forest 1.3km southeast of Headquarters Lake, Slikok watershed project site MG33		7/21/2016	2016-07-21	2016-07-21	media	60.44502	-151.05078	10975218		Tracheophyta	Vaccinium		Plantae	Vaccinium vitis-idaea	KNWR-2016.01-Slikok-ObsHerb	MG33
http://creativecommons.org/publicdomain/zero/1.0/	KNWRObs:Herb:160	Aconitum delphiniifolium	Ranunculales	Ranunculaceae	Magnoliopsida			Matt Bowser	20	United States	Alaska	Soldotna, forest 1.6km southeast of Headquarters Lake, Slikok watershed project site MG34		7/21/2016	2016-07-21	2016-07-21	media	60.44483	-151.04167	10975219		Tracheophyta	Aconitum		Plantae	Aconitum delphiniifolium	KNWR-2016.01-Slikok-ObsHerb	MG34
http://creativecommons.org/publicdomain/zero/1.0/	KNWRObs:Herb:161	Hylocomium splendens	Hypnales	Hylocomiaceae	Bryopsida			Matt Bowser	20	United States	Alaska	Soldotna, Ski Hill Road, Nordic View Trail by Nordic Lake, Slikok watershed project site SK15		8/9/2016	2016-08-09	2016-08-09	media	60.45028	-151.08681	10975227		Bryophyta	Hylocomium		Plantae	Hylocomium splendens	KNWR-2016.01-Slikok-ObsHerb	SK15
http://creativecommons.org/publicdomain/zero/1.0/	KNWRObs:Herb:171	Pleurozium schreberi	Hypnales	Hylocomiaceae	Bryopsida			Matt Bowser	20	United States	Alaska	Soldotna, Ski Hill Road, Nordic View Trail by Nordic Lake, Slikok watershed project site SK15		8/9/2016	2016-08-09	2016-08-09	media	60.45028	-151.08681	10975227		Bryophyta	Pleurozium		Plantae	Pleurozium schreberi	KNWR-2016.01-Slikok-ObsHerb	SK15
http://creativecommons.org/publicdomain/zero/1.0/	KNWRObs:Herb:174	Carex canescens	Poales	Cyperaceae	Liliopsida			Matt Bowser	20	United States	Alaska	Soldotna, muskeg 0.6km northeast of Headquarters Lake, Slikok watershed project site MG09		7/19/2016	2016-07-19	2016-07-19	media	60.46289	-151.04916	10975200		Tracheophyta	Carex		Plantae	Carex canescens	KNWR-2016.01-Slikok-ObsHerb	MG09
http://creativecommons.org/publicdomain/zero/1.0/	KNWRObs:Herb:195	Chamerion angustifolium	Myrtales	Onagraceae	Magnoliopsida			Matt Bowser	20	United States	Alaska	Soldotna, forest 120m east of Nordic Lake, Slikok watershed project site MG24		8/3/2016	2016-08-03	2016-08-03	media	60.45008	-151.0777	10975211		Tracheophyta	Chamerion		Plantae	Chamerion angustifolium	KNWR-2016.01-Slikok-ObsHerb	MG24
http://creativecommons.org/publicdomain/zero/1.0/	KNWRObs:Herb:199	Geocaulon lividum	Santalales	Santalaceae	Magnoliopsida			Matt Bowser	20	United States	Alaska	Soldotna, forest 120m east of Nordic Lake, Slikok watershed project site MG24		8/3/2016	2016-08-03	2016-08-03	media	60.45008	-151.0777	10975211		Tracheophyta	Geocaulon		Plantae	Geocaulon lividum	KNWR-2016.01-Slikok-ObsHerb	MG24
http://creativecommons.org/publicdomain/zero/1.0/	KNWRObs:Herb:203	Equisetum arvense	Equisetales	Equisetaceae	Equisetopsida			Matt Bowser	20	United States	Alaska	Soldotna, forest 1.6km southeast of Headquarters Lake, Slikok watershed project site MG34		7/21/2016	2016-07-21	2016-07-21	media	60.44483	-151.04167	10975219		Tracheophyta	Equisetum		Plantae	Equisetum arvense	KNWR-2016.01-Slikok-ObsHerb	MG34
http://creativecommons.org/publicdomain/zero/1.0/	KNWRObs:Herb:214	Viola epipsila	Malpighiales	Violaceae	Magnoliopsida			Matt Bowser	20	United States	Alaska	Soldotna, wetland 490m south of Headquarters Lake, Slikok watershed project site SK16		8/3/2016	2016-08-03	2016-08-03	media	60.44989	-151.06859	10975228		Tracheophyta	Viola		Plantae	Viola epipsila	KNWR-2016.01-Slikok-ObsHerb	SK16
http://creativecommons.org/publicdomain/zero/1.0/	KNWRObs:Herb:217	Calamagrostis canadensis	Poales	Poaceae	Liliopsida			Matt Bowser	20	United States	Alaska	Soldotna, forest 940m southeast of Headquarters Lake, Slikok watershed project site SK17		7/20/2016	2016-07-20	2016-07-20	media	60.44949	-151.05037	10975229		Tracheophyta	Calamagrostis		Plantae	Calamagrostis canadensis	KNWR-2016.01-Slikok-ObsHerb	SK17
http://creativecommons.org/publicdomain/zero/1.0/	KNWRObs:Herb:220	Equisetum sylvaticum	Equisetales	Equisetaceae	Equisetopsida			Matt Bowser	20	United States	Alaska	Soldotna, forest 940m southeast of Headquarters Lake, Slikok watershed project site SK17		7/20/2016	2016-07-20	2016-07-20	media	60.44949	-151.05037	10975229		Tracheophyta	Equisetum		Plantae	Equisetum sylvaticum	KNWR-2016.01-Slikok-ObsHerb	SK17
http://creativecommons.org/publicdomain/zero/1.0/	KNWRObs:Herb:229	Calamagrostis canadensis	Poales	Poaceae	Liliopsida			Matt Bowser	20	United States	Alaska	Soldotna, 40m east of Sterling Highway 480m northeast of intersection with south end of Ski Hill Road, Slikok watershed project site MG10		8/10/2016	2016-08-10	2016-08-10	media	60.45941	-151.09513	10975201		Tracheophyta	Calamagrostis		Plantae	Calamagrostis canadensis	KNWR-2016.01-Slikok-ObsHerb	MG10
http://creativecommons.org/publicdomain/zero/1.0/	KNWRObs:Herb:232	Equisetum arvense	Equisetales	Equisetaceae	Equisetopsida			Matt Bowser	20	United States	Alaska	Soldotna, 40m east of Sterling Highway 480m northeast of intersection with south end of Ski Hill Road, Slikok watershed project site MG10		8/10/2016	2016-08-10	2016-08-10	media	60.45941	-151.09513	10975201		Tracheophyta	Equisetum		Plantae	Equisetum arvense	KNWR-2016.01-Slikok-ObsHerb	MG10
http://creativecommons.org/publicdomain/zero/1.0/	KNWRObs:Herb:239	Linnaea borealis	Dipsacales	Caprifoliaceae	Magnoliopsida			Matt Bowser	20	United States	Alaska	Soldotna, forest 120m east of Nordic Lake, Slikok watershed project site MG24		8/3/2016	2016-08-03	2016-08-03	media	60.45008	-151.0777	10975211		Tracheophyta	Linnaea		Plantae	Linnaea borealis	KNWR-2016.01-Slikok-ObsHerb	MG24
http://creativecommons.org/publicdomain/zero/1.0/	KNWRObs:Herb:237	Linnaea borealis	Dipsacales	Caprifoliaceae	Magnoliopsida			Matt Bowser	20	United States	Alaska	Soldotna, 40m east of Sterling Highway 480m northeast of intersection with south end of Ski Hill Road, Slikok watershed project site MG10		8/10/2016	2016-08-10	2016-08-10	media	60.45941	-151.09513	10975201		Tracheophyta	Linnaea		Plantae	Linnaea borealis	KNWR-2016.01-Slikok-ObsHerb	MG10
http://creativecommons.org/publicdomain/zero/1.0/	KNWRObs:Herb:245	Rosa acicularis	Rosales	Rosaceae	Magnoliopsida			Matt Bowser	20	United States	Alaska	Soldotna, forest 120m east of Nordic Lake, Slikok watershed project site MG24		8/3/2016	2016-08-03	2016-08-03	media	60.45008	-151.0777	10975211		Tracheophyta	Rosa		Plantae	Rosa acicularis	KNWR-2016.01-Slikok-ObsHerb	MG24
http://creativecommons.org/publicdomain/zero/1.0/	KNWRObs:Herb:251	Pyrola asarifolia	Ericales	Ericaceae	Magnoliopsida			Matt Bowser	20	United States	Alaska	Soldotna, forest 1.6km southeast of Headquarters Lake, Slikok watershed project site MG34		7/21/2016	2016-07-21	2016-07-21	media	60.44483	-151.04167	10975219		Tracheophyta	Pyrola		Plantae	Pyrola asarifolia	KNWR-2016.01-Slikok-ObsHerb	MG34
http://creativecommons.org/publicdomain/zero/1.0/	KNWRObs:Herb:261	Calamagrostis canadensis	Poales	Poaceae	Liliopsida			Matt Bowser	20	United States	Alaska	Soldotna, forest between Raven Ridge Trail and Central Peninsula landfill, Slikok watershed project site MG35		7/26/2016	2016-07-26	2016-07-26	media	60.44154	-151.09672	10975220		Tracheophyta	Calamagrostis		Plantae	Calamagrostis canadensis	KNWR-2016.01-Slikok-ObsHerb	MG35
http://creativecommons.org/publicdomain/zero/1.0/	KNWRObs:Herb:266	Equisetum pratense	Equisetales	Equisetaceae	Equisetopsida			Matt Bowser	20	United States	Alaska	Soldotna, forest 880m southeast of Nordic Lake, Slikok watershed project site SK23		8/3/2016	2016-08-03	2016-08-03	media	60.44095	-151.0694	10975231		Tracheophyta	Equisetum		Plantae	Equisetum pratense	KNWR-2016.01-Slikok-ObsHerb	SK23
http://creativecommons.org/publicdomain/zero/1.0/	KNWRObs:Herb:267	Geocaulon lividum	Santalales	Santalaceae	Magnoliopsida			Matt Bowser	20	United States	Alaska	Soldotna, forest 880m southeast of Nordic Lake, Slikok watershed project site SK23		8/3/2016	2016-08-03	2016-08-03	media	60.44095	-151.0694	10975231		Tracheophyta	Geocaulon		Plantae	Geocaulon lividum	KNWR-2016.01-Slikok-ObsHerb	SK23
http://creativecommons.org/publicdomain/zero/1.0/	KNWRObs:Herb:358	Trientalis europaea	Ericales	Primulaceae	Magnoliopsida			Matt Bowser	20	United States	Alaska	Soldotna, forest between Raven Ridge Trail and Central Peninsula landfill, Slikok watershed project site MG35		7/26/2016	2016-07-26	2016-07-26	media	60.44154	-151.09672	10975220		Tracheophyta	Trientalis		Plantae	Trientalis europaea	KNWR-2016.01-Slikok-ObsHerb	MG35
http://creativecommons.org/publicdomain/zero/1.0/	KNWRObs:Herb:366	Empetrum nigrum	Ericales	Empetraceae	Magnoliopsida			Matt Bowser	20	United States	Alaska	Soldotna, forest 610m southweast of Nordic Lake, Slikok watershed project site SK22		8/9/2016	2016-08-09	2016-08-09	media	60.44135	-151.08761	10975230		Tracheophyta	Empetrum		Plantae	Empetrum nigrum	KNWR-2016.01-Slikok-ObsHerb	SK22
http://creativecommons.org/publicdomain/zero/1.0/	KNWRObs:Herb:282	Lobaria pulmonaria			Lecanoromycetes			Matt Bowser	20	United States	Alaska	Soldotna, 40m east of Sterling Highway 480m northeast of intersection with south end of Ski Hill Road, Slikok watershed project site MG10		8/10/2016	2016-08-10	2016-08-10	media	60.45941	-151.09513	10975201		Ascomycota	Lobaria		Fungi	Lobaria pulmonaria	KNWR-2016.01-Slikok-ObsHerb	MG10
http://creativecommons.org/publicdomain/zero/1.0/	KNWRObs:Herb:284	Rubus pedatus	Rosales	Rosaceae	Magnoliopsida			Matt Bowser	20	United States	Alaska	Soldotna, 40m east of Sterling Highway 480m northeast of intersection with south end of Ski Hill Road, Slikok watershed project site MG10		8/10/2016	2016-08-10	2016-08-10	media	60.45941	-151.09513	10975201		Tracheophyta	Rubus		Plantae	Rubus pedatus	KNWR-2016.01-Slikok-ObsHerb	MG10
http://creativecommons.org/publicdomain/zero/1.0/	KNWRObs:Herb:288	Chamerion angustifolium	Myrtales	Onagraceae	Magnoliopsida			Matt Bowser	20	United States	Alaska	Soldotna, forest 600m south-southeast of Headquarters Lake, Slikok watershed project site MG26		7/20/2016	2016-07-20	2016-07-20	media	60.44969	-151.05948	10975212		Tracheophyta	Chamerion		Plantae	Chamerion angustifolium	KNWR-2016.01-Slikok-ObsHerb	MG26
http://creativecommons.org/publicdomain/zero/1.0/	KNWRObs:Herb:296	Betula neoalaskana	Fagales	Betulaceae	Magnoliopsida			Matt Bowser	20	United States	Alaska	Soldotna, forest 600m south-southeast of Headquarters Lake, Slikok watershed project site MG26		7/20/2016	2016-07-20	2016-07-20	media	60.44969	-151.05948	10975212		Tracheophyta	Betula		Plantae	Betula neoalaskana	KNWR-2016.01-Slikok-ObsHerb	MG26
http://creativecommons.org/publicdomain/zero/1.0/	KNWRObs:Herb:314	Andromeda polifolia	Ericales	Ericaceae	Magnoliopsida			Matt Bowser	20	United States	Alaska	Soldotna, wetland 490m south of Headquarters Lake, Slikok watershed project site SK16		8/3/2016	2016-08-03	2016-08-03	media	60.44989	-151.06859	10975228		Tracheophyta	Andromeda		Plantae	Andromeda polifolia	KNWR-2016.01-Slikok-ObsHerb	SK16
http://creativecommons.org/publicdomain/zero/1.0/	KNWRObs:Herb:322	Empetrum nigrum	Ericales	Empetraceae	Magnoliopsida			Matt Bowser	20	United States	Alaska	Soldotna, wetland 490m south of Headquarters Lake, Slikok watershed project site SK16		8/3/2016	2016-08-03	2016-08-03	media	60.44989	-151.06859	10975228		Tracheophyta	Empetrum		Plantae	Empetrum nigrum	KNWR-2016.01-Slikok-ObsHerb	SK16
http://creativecommons.org/publicdomain/zero/1.0/	KNWRObs:Herb:330	Eriophorum angustifolium	Poales	Cyperaceae	Liliopsida			Matt Bowser	20	United States	Alaska	Soldotna, in wetland 400m south-southwest of floatplane dock on Headquarters Lake, Slikok watershed project site MG12		8/1/2016	2016-08-01	2016-08-01	media	60.45902	-151.0769	10975202		Tracheophyta	Eriophorum		Plantae	Eriophorum angustifolium	KNWR-2016.01-Slikok-ObsHerb	MG12
http://creativecommons.org/publicdomain/zero/1.0/	KNWRObs:Herb:378	Trichophorum caespitosum	Poales	Cyperaceae	Liliopsida			Matt Bowser	20	United States	Alaska	Soldotna, in wetland 400m south-southwest of floatplane dock on Headquarters Lake, Slikok watershed project site MG12		8/1/2016	2016-08-01	2016-08-01	media	60.45902	-151.0769	10975202		Tracheophyta	Trichophorum		Plantae	Trichophorum caespitosum	KNWR-2016.01-Slikok-ObsHerb	MG12
http://creativecommons.org/publicdomain/zero/1.0/	KNWRObs:Herb:461	Cladonia	Lecanorales	Cladoniaceae	Lecanoromycetes			Matt Bowser	20	United States	Alaska	Soldotna, forest 1.5km south of Headquarters Lake, Slikok watershed project site MG39		7/29/2016	2016-07-29	2016-07-29	media	60.44076	-151.06029	10975222		Ascomycota	Cladonia		Fungi		KNWR-2016.01-Slikok-ObsHerb	MG39
http://creativecommons.org/publicdomain/zero/1.0/	KNWRObs:Herb:470	Myrica gale	Fagales	Myricaceae	Magnoliopsida			Matt Bowser	20	United States	Alaska	Soldotna, wetland 490m south of Headquarters Lake, Slikok watershed project site SK16		8/3/2016	2016-08-03	2016-08-03	media	60.44989	-151.06859	10975228		Tracheophyta	Myrica		Plantae	Myrica gale	KNWR-2016.01-Slikok-ObsHerb	SK16
http://creativecommons.org/licenses/by/3.0/	UAMObs:Ento:238728	Dikraneura sp. BOLD:AAV0227	Hemiptera	Cicadellidae	Insecta		(same lot as) KNWR:Ento http://arctos.database.museum/guid/KNWR:Ento:10875	Matt Bowser, Dawn Magness	12	United States	Alaska	Soldotna, forest 1.6km southeast of Headquarters Lake, Slikok watershed project site MG34, east half of plot	50 m2 sweep net sample	6/16/2016	2016-06-16	2016-06-16	media	60.44483	-151.04167	10970668	wild caught	Arthropoda	Dikraneura		Animalia	Dikraneura sp. BOLD:AAV0227	UAM-2019.02-Slikok_Creek_bioinventory-Ento	MG34
http://creativecommons.org/licenses/by/3.0/	UAMObs:Ento:238821	Coenosia morrisoni	Diptera	Muscidae	Insecta		(same lot as) KNWR:Ento http://arctos.database.museum/guid/KNWR:Ento:10877	Matt Bowser, Todd Eskelin	12	United States	Alaska	Soldotna, forest between Raven Ridge Trail and Central Peninsula landfill, Slikok watershed project site MG35, east half of plot	50 m2 sweep net sample	6/15/2016	2016-06-15	2016-06-15	media	60.44154	-151.09672	10970670	wild caught	Arthropoda	Coenosia		Animalia	Coenosia morrisoni	UAM-2019.02-Slikok_Creek_bioinventory-Ento	MG35
http://creativecommons.org/licenses/by/3.0/	UAMObs:Ento:238732	Agromyzidae sp. SlikokOtu742	Diptera	Agromyzidae	Insecta		(same lot as) KNWR:Ento http://arctos.database.museum/guid/KNWR:Ento:10879	Matt Bowser, Todd Eskelin	12	United States	Alaska	Soldotna, muskeg 600m south of Nordic Lake, Slikok watershed project site MG37, east half of plot	50 m2 sweep net sample	6/15/2016	2016-06-15	2016-06-15	media	60.44115	-151.07851	10970672	wild caught	Arthropoda			Animalia		UAM-2019.02-Slikok_Creek_bioinventory-Ento	MG37
http://creativecommons.org/licenses/by/3.0/	UAMObs:Ento:238733	Agromyzidae sp. SlikokOtu764	Diptera	Agromyzidae	Insecta		(same lot as) KNWR:Ento http://arctos.database.museum/guid/KNWR:Ento:10879	Matt Bowser, Todd Eskelin	12	United States	Alaska	Soldotna, muskeg 600m south of Nordic Lake, Slikok watershed project site MG37, east half of plot	50 m2 sweep net sample	6/15/2016	2016-06-15	2016-06-15	media	60.44115	-151.07851	10970672	wild caught	Arthropoda			Animalia		UAM-2019.02-Slikok_Creek_bioinventory-Ento	MG37
http://creativecommons.org/licenses/by/3.0/	UAMObs:Ento:238738	Cinara nimbata	Hemiptera	Lachnidae	Insecta		(same lot as) KNWR:Ento http://arctos.database.museum/guid/KNWR:Ento:10879	Matt Bowser, Todd Eskelin	12	United States	Alaska	Soldotna, muskeg 600m south of Nordic Lake, Slikok watershed project site MG37, east half of plot	50 m2 sweep net sample	6/15/2016	2016-06-15	2016-06-15	media	60.44115	-151.07851	10970672	wild caught	Arthropoda	Cinara		Animalia	Cinara nimbata	UAM-2019.02-Slikok_Creek_bioinventory-Ento	MG37
http://creativecommons.org/licenses/by/3.0/	UAMObs:Ento:238781	Leptosciarella sp. SlikokOtu1674	Diptera	Sciaridae	Insecta		(same lot as) KNWR:Ento http://arctos.database.museum/guid/KNWR:Ento:10875	Matt Bowser, Dawn Magness	12	United States	Alaska	Soldotna, forest 1.6km southeast of Headquarters Lake, Slikok watershed project site MG34, east half of plot	50 m2 sweep net sample	6/16/2016	2016-06-16	2016-06-16	media	60.44483	-151.04167	10970668	wild caught	Arthropoda	Leptosciarella		Animalia		UAM-2019.02-Slikok_Creek_bioinventory-Ento	MG34
http://creativecommons.org/licenses/by/3.0/	UAMObs:Ento:238786	Mycomya nitida	Diptera	Mycetophilidae	Insecta		(same lot as) KNWR:Ento http://arctos.database.museum/guid/KNWR:Ento:10875	Matt Bowser, Dawn Magness	12	United States	Alaska	Soldotna, forest 1.6km southeast of Headquarters Lake, Slikok watershed project site MG34, east half of plot	50 m2 sweep net sample	6/16/2016	2016-06-16	2016-06-16	media	60.44483	-151.04167	10970668	wild caught	Arthropoda	Mycomya		Animalia	Mycomya nitida	UAM-2019.02-Slikok_Creek_bioinventory-Ento	MG34
http://creativecommons.org/licenses/by/3.0/	UAMObs:Ento:238755	Plunomia sp. BOLD:AAG6897	Diptera	Chamaemyiidae	Insecta		(same lot as) KNWR:Ento http://arctos.database.museum/guid/KNWR:Ento:10879	Matt Bowser, Todd Eskelin	12	United States	Alaska	Soldotna, muskeg 600m south of Nordic Lake, Slikok watershed project site MG37, east half of plot	50 m2 sweep net sample	6/15/2016	2016-06-15	2016-06-15	media	60.44115	-151.07851	10970672	wild caught	Arthropoda	Plunomia		Animalia	Plunomia sp. BOLD:AAG6897	UAM-2019.02-Slikok_Creek_bioinventory-Ento	MG37
http://creativecommons.org/licenses/by/3.0/	UAMObs:Ento:238696	Cacopsylla myrtilli	Hemiptera	Psyllidae	Insecta		(same lot as) KNWR:Ento http://arctos.database.museum/guid/KNWR:Ento:10873	Matt Bowser, Dawn Magness	12	United States	Alaska	Soldotna, forest 1.3km southeast of Headquarters Lake, Slikok watershed project site MG33, east half of plot	50 m2 sweep net sample	6/16/2016	2016-06-16	2016-06-16	media	60.44502	-151.05078	10970666	wild caught	Arthropoda	Cacopsylla		Animalia	Cacopsylla myrtilli	UAM-2019.02-Slikok_Creek_bioinventory-Ento	MG33
http://creativecommons.org/licenses/by/3.0/	UAMObs:Ento:238707	Estrandia grandaeva	Araneae	Linyphiidae	Arachnida		(same lot as) KNWR:Ento http://arctos.database.museum/guid/KNWR:Ento:10873	Matt Bowser, Dawn Magness	12	United States	Alaska	Soldotna, forest 1.3km southeast of Headquarters Lake, Slikok watershed project site MG33, east half of plot	50 m2 sweep net sample	6/16/2016	2016-06-16	2016-06-16	media	60.44502	-151.05078	10970666	wild caught	Arthropoda	Estrandia		Animalia	Estrandia grandaeva	UAM-2019.02-Slikok_Creek_bioinventory-Ento	MG33
http://creativecommons.org/licenses/by/3.0/	UAMObs:Ento:238768	Gelis sp. BOLD:AAA6283	Hymenoptera	Ichneumonidae	Insecta		(same lot as) KNWR:Ento http://arctos.database.museum/guid/KNWR:Ento:10881	Matt Bowser, Todd Eskelin	12	United States	Alaska	Soldotna, forest 1.5km south of Headquarters Lake, Slikok watershed project site MG39, east half of plot	50 m2 sweep net sample	6/15/2016	2016-06-15	2016-06-15	media	60.44076	-151.06029	10970674	wild caught	Arthropoda	Gelis		Animalia	Gelis sp. BOLD:AAA6283	UAM-2019.02-Slikok_Creek_bioinventory-Ento	MG39
http://creativecommons.org/licenses/by/3.0/	UAMObs:Ento:238773	Misumena vatia	Araneae	Thomisidae	Arachnida		(same lot as) KNWR:Ento http://arctos.database.museum/guid/KNWR:Ento:10881	Matt Bowser, Todd Eskelin	12	United States	Alaska	Soldotna, forest 1.5km south of Headquarters Lake, Slikok watershed project site MG39, east half of plot	50 m2 sweep net sample	6/15/2016	2016-06-15	2016-06-15	media	60.44076	-151.06029	10970674	wild caught	Arthropoda	Misumena		Animalia	Misumena vatia	UAM-2019.02-Slikok_Creek_bioinventory-Ento	MG39
http://creativecommons.org/licenses/by/3.0/	UAMObs:Ento:238717	Orthomiscus unicinctus	Hymenoptera	Ichneumonidae	Insecta		(same lot as) KNWR:Ento http://arctos.database.museum/guid/KNWR:Ento:10873	Matt Bowser, Dawn Magness	12	United States	Alaska	Soldotna, forest 1.3km southeast of Headquarters Lake, Slikok watershed project site MG33, east half of plot	50 m2 sweep net sample	6/16/2016	2016-06-16	2016-06-16	media	60.44502	-151.05078	10970666	wild caught	Arthropoda	Orthomiscus		Animalia	Orthomiscus unicinctus	UAM-2019.02-Slikok_Creek_bioinventory-Ento	MG33
http://creativecommons.org/licenses/by/3.0/	UAMObs:Ento:238719	Psyllidae sp. BOLD:AAG8690	Hemiptera	Psyllidae	Insecta		(same lot as) KNWR:Ento http://arctos.database.museum/guid/KNWR:Ento:10873	Matt Bowser, Dawn Magness	12	United States	Alaska	Soldotna, forest 1.3km southeast of Headquarters Lake, Slikok watershed project site MG33, east half of plot	50 m2 sweep net sample	6/16/2016	2016-06-16	2016-06-16	media	60.44502	-151.05078	10970666	wild caught	Arthropoda			Animalia	Psyllidae sp. BOLD:AAG8690	UAM-2019.02-Slikok_Creek_bioinventory-Ento	MG33
http://creativecommons.org/licenses/by/3.0/	UAMObs:Ento:238722	Suillia convergens	Diptera	Heleomyzidae	Insecta		(same lot as) KNWR:Ento http://arctos.database.museum/guid/KNWR:Ento:10873	Matt Bowser, Dawn Magness	12	United States	Alaska	Soldotna, forest 1.3km southeast of Headquarters Lake, Slikok watershed project site MG33, east half of plot	50 m2 sweep net sample	6/16/2016	2016-06-16	2016-06-16	media	60.44502	-151.05078	10970666	wild caught	Arthropoda	Suillia		Animalia	Suillia convergens	UAM-2019.02-Slikok_Creek_bioinventory-Ento	MG33
http://creativecommons.org/licenses/by/3.0/	UAMObs:Ento:238723	Vertigo cristata	Pulmonata	Vertiginidae	Gastropoda		(same lot as) KNWR:Ento http://arctos.database.museum/guid/KNWR:Ento:10873	Matt Bowser, Dawn Magness	12	United States	Alaska	Soldotna, forest 1.3km southeast of Headquarters Lake, Slikok watershed project site MG33, east half of plot	50 m2 sweep net sample	6/16/2016	2016-06-16	2016-06-16	media	60.44502	-151.05078	10970666	wild caught	Mollusca	Vertigo		Animalia	Vertigo cristata	UAM-2019.02-Slikok_Creek_bioinventory-Ento	MG33
http://creativecommons.org/licenses/by/3.0/	UAMObs:Ento:238593	Ochlerotatus excrucians	Diptera	Culicidae	Insecta		(same lot as) KNWR:Ento http://arctos.database.museum/guid/KNWR:Ento:10869	Matt Bowser, Dawn Magness	12	United States	Alaska	Soldotna, forest 980m south of Headquarters Lake, Slikok watershed project site MG31, east half of plot	50 m2 sweep net sample	6/16/2016	2016-06-16	2016-06-16	media	60.44542	-151.069	10970662	wild caught	Arthropoda	Ochlerotatus		Animalia	Ochlerotatus excrucians	UAM-2019.02-Slikok_Creek_bioinventory-Ento	MG31
http://creativecommons.org/licenses/by/3.0/	UAMObs:Ento:238619	Orthocentrinae sp. BOLD:AAU9320	Hymenoptera	Ichneumonidae	Insecta		(same lot as) KNWR:Ento http://arctos.database.museum/guid/KNWR:Ento:10871	Matt Bowser, Dawn Magness	12	United States	Alaska	Soldotna, forest 1km south of Headquarters Lake, Slikok watershed project site MG32, east half of plot	50 m2 sweep net sample	6/16/2016	2016-06-16	2016-06-16	media	60.44522	-151.05989	10970664	wild caught	Arthropoda			Animalia	Orthocentrinae sp. BOLD:AAU9320	UAM-2019.02-Slikok_Creek_bioinventory-Ento	MG32
http://creativecommons.org/licenses/by/3.0/	UAMObs:Ento:238620	Phyllonorycter junoniella	Lepidoptera	Gracillariidae	Insecta		(same lot as) KNWR:Ento http://arctos.database.museum/guid/KNWR:Ento:10871	Matt Bowser, Dawn Magness	12	United States	Alaska	Soldotna, forest 1km south of Headquarters Lake, Slikok watershed project site MG32, east half of plot	50 m2 sweep net sample	6/16/2016	2016-06-16	2016-06-16	media	60.44522	-151.05989	10970664	wild caught	Arthropoda	Phyllonorycter		Animalia	Phyllonorycter junoniella	UAM-2019.02-Slikok_Creek_bioinventory-Ento	MG32
http://creativecommons.org/licenses/by/3.0/	UAMObs:Ento:238629	Hybotidae sp. BOLD:ACX4896	Diptera	Hybotidae	Insecta		(same lot as) KNWR:Ento http://arctos.database.museum/guid/KNWR:Ento:10866	Matt Bowser, Dawn Magness	12	United States	Alaska	Soldotna, Ski Hill Road, Centennial Trail north of Headquarters Lake, Slikok watershed project site MG02, east half of plot	50 m2 sweep net sample	6/14/2016	2016-06-14	2016-06-14	media	60.46755	-151.05787	10970655	wild caught	Arthropoda			Animalia	Hybotidae sp. BOLD:ACX4896	UAM-2019.02-Slikok_Creek_bioinventory-Ento	MG02
http://creativecommons.org/licenses/by/3.0/	UAMObs:Ento:238630	Megaphthalmoides unilineatus	Diptera	Scathophagidae	Insecta		(same lot as) KNWR:Ento http://arctos.database.museum/guid/KNWR:Ento:10866	Matt Bowser, Dawn Magness	12	United States	Alaska	Soldotna, Ski Hill Road, Centennial Trail north of Headquarters Lake, Slikok watershed project site MG02, east half of plot	50 m2 sweep net sample	6/14/2016	2016-06-14	2016-06-14	media	60.46755	-151.05787	10970655	wild caught	Arthropoda	Megaphthalmoides		Animalia	Megaphthalmoides unilineatus	UAM-2019.02-Slikok_Creek_bioinventory-Ento	MG02
http://creativecommons.org/licenses/by/3.0/	UAMObs:Ento:238640	Canalidion montanum	Araneae	Theridiidae	Arachnida		(same lot as) KNWR:Ento http://arctos.database.museum/guid/KNWR:Ento:10867	Matt Bowser, Dawn Magness	12	United States	Alaska	Soldotna, forest 180m south-southeast of Nordic Lake, Slikok watershed project site MG30, east half of plot	50 m2 sweep net sample	6/16/2016	2016-06-16	2016-06-16	media	60.44562	-151.0781	10970660	wild caught	Arthropoda	Canalidion		Animalia	Canalidion montanum	UAM-2019.02-Slikok_Creek_bioinventory-Ento	MG30
http://creativecommons.org/licenses/by/3.0/	UAMObs:Ento:238644	Suillia convergens	Diptera	Heleomyzidae	Insecta		(same lot as) KNWR:Ento http://arctos.database.museum/guid/KNWR:Ento:10866	Matt Bowser, Dawn Magness	12	United States	Alaska	Soldotna, Ski Hill Road, Centennial Trail north of Headquarters Lake, Slikok watershed project site MG02, east half of plot	50 m2 sweep net sample	6/14/2016	2016-06-14	2016-06-14	media	60.46755	-151.05787	10970655	wild caught	Arthropoda	Suillia		Animalia	Suillia convergens	UAM-2019.02-Slikok_Creek_bioinventory-Ento	MG02
http://creativecommons.org/licenses/by/3.0/	UAMObs:Ento:238646	Coleophora glitzella	Lepidoptera	Coleophoridae	Insecta		(same lot as) KNWR:Ento http://arctos.database.museum/guid/KNWR:Ento:10867	Matt Bowser, Dawn Magness	12	United States	Alaska	Soldotna, forest 180m south-southeast of Nordic Lake, Slikok watershed project site MG30, east half of plot	50 m2 sweep net sample	6/16/2016	2016-06-16	2016-06-16	media	60.44562	-151.0781	10970660	wild caught	Arthropoda	Coleophora		Animalia	Coleophora glitzella	UAM-2019.02-Slikok_Creek_bioinventory-Ento	MG30
http://creativecommons.org/licenses/by/3.0/	UAMObs:Ento:238903	Muscidae sp. SlikokOtu843	Diptera	Muscidae	Insecta		(same lot as) KNWR:Ento http://arctos.database.museum/guid/KNWR:Ento:10881	Matt Bowser, Todd Eskelin	12	United States	Alaska	Soldotna, forest 1.5km south of Headquarters Lake, Slikok watershed project site MG39, east half of plot	50 m2 sweep net sample	6/15/2016	2016-06-15	2016-06-15	media	60.44076	-151.06029	10970674	wild caught	Arthropoda			Animalia		UAM-2019.02-Slikok_Creek_bioinventory-Ento	MG39
http://creativecommons.org/licenses/by/3.0/	UAMObs:Ento:238654	Mughiphantes sp. 1GAB	Araneae	Linyphiidae	Arachnida		(same lot as) KNWR:Ento http://arctos.database.museum/guid/KNWR:Ento:10867	Matt Bowser, Dawn Magness	12	United States	Alaska	Soldotna, forest 180m south-southeast of Nordic Lake, Slikok watershed project site MG30, east half of plot	50 m2 sweep net sample	6/16/2016	2016-06-16	2016-06-16	media	60.44562	-151.0781	10970660	wild caught	Arthropoda	Mughiphantes		Animalia		UAM-2019.02-Slikok_Creek_bioinventory-Ento	MG30
http://creativecommons.org/licenses/by/3.0/	UAMObs:Ento:238864	Pinalitus rostratus	Hemiptera	Miridae	Insecta		(same lot as) KNWR:Ento http://arctos.database.museum/guid/KNWR:Ento:10891	Matt Bowser, Todd Eskelin	12	United States	Alaska	Soldotna, forest 610m southweast of Nordic Lake, Slikok watershed project site SK22, east half of plot	50 m2 sweep net sample	6/15/2016	2016-06-15	2016-06-15	media	60.44135	-151.08761	10970684	wild caught	Arthropoda	Pinalitus		Animalia	Pinalitus rostratus	UAM-2019.02-Slikok_Creek_bioinventory-Ento	SK22
http://creativecommons.org/licenses/by/3.0/	UAMObs:Ento:238655	Ohlertidion ohlerti	Araneae	Theridiidae	Arachnida		(same lot as) KNWR:Ento http://arctos.database.museum/guid/KNWR:Ento:10867	Matt Bowser, Dawn Magness	12	United States	Alaska	Soldotna, forest 180m south-southeast of Nordic Lake, Slikok watershed project site MG30, east half of plot	50 m2 sweep net sample	6/16/2016	2016-06-16	2016-06-16	media	60.44562	-151.0781	10970660	wild caught	Arthropoda	Ohlertidion		Animalia	Ohlertidion ohlerti	UAM-2019.02-Slikok_Creek_bioinventory-Ento	MG30
http://creativecommons.org/licenses/by/3.0/	UAMObs:Ento:238662	Vertigo sp. BOLD:AAM4033	Pulmonata	Vertiginidae	Gastropoda		(same lot as) KNWR:Ento http://arctos.database.museum/guid/KNWR:Ento:10867	Matt Bowser, Dawn Magness	12	United States	Alaska	Soldotna, forest 180m south-southeast of Nordic Lake, Slikok watershed project site MG30, east half of plot	50 m2 sweep net sample	6/16/2016	2016-06-16	2016-06-16	media	60.44562	-151.0781	10970660	wild caught	Mollusca	Vertigo		Animalia	Vertigo sp. BOLD:AAM4033	UAM-2019.02-Slikok_Creek_bioinventory-Ento	MG30
http://creativecommons.org/licenses/by/3.0/	UAMObs:Ento:239860	Cinara fornacula	Hemiptera	Lachnidae	Insecta		(same lot as) KNWR:Ento http://arctos.database.museum/guid/KNWR:Ento:10972	Mariah McInnis, Matt Bowser	12	United States	Alaska	Soldotna, forest 610m southweast of Nordic Lake, Slikok watershed project site SK22, east half of plot	50 m2 sweep net sample	8/9/2016	2016-08-09	2016-08-09	media	60.44135	-151.08761	10977486	wild caught	Arthropoda	Cinara		Animalia	Cinara fornacula	UAM-2019.02-Slikok_Creek_bioinventory-Ento	SK22
http://creativecommons.org/licenses/by/3.0/	UAMObs:Ento:239897	Vespula alascensis	Hymenoptera	Vespidae	Insecta		(same lot as) KNWR:Ento http://arctos.database.museum/guid/KNWR:Ento:10948	Matt Bowser	12	United States	Alaska	Soldotna, Ski Hill Road, Centennial Trail north of Headquarters Lake, Slikok watershed project site MG02, east half of plot	50 m2 sweep net sample	7/19/2016	2016-07-19	2016-07-19	media	60.46755	-151.05787	10977462	wild caught	Arthropoda	Vespula		Animalia	Vespula alascensis	UAM-2019.02-Slikok_Creek_bioinventory-Ento	MG02
http://creativecommons.org/licenses/by/3.0/	UAMObs:Ento:239899	Bradysia hilaris	Diptera	Sciaridae	Insecta		(same lot as) KNWR:Ento http://arctos.database.museum/guid/KNWR:Ento:10950	Joel Stone, Mariah McInnis, Matt Bowser	12	United States	Alaska	Soldotna, forest 1.6km southeast of Headquarters Lake, Slikok watershed project site MG34, east half of plot	50 m2 sweep net sample	7/21/2016	2016-07-21	2016-07-21	media	60.44483	-151.04167	10977464	wild caught	Arthropoda	Bradysia		Animalia	Bradysia hilaris	UAM-2019.02-Slikok_Creek_bioinventory-Ento	MG34
http://creativecommons.org/licenses/by/3.0/	UAMObs:Ento:239904	Ephedrus lacertosus	Hymenoptera	Braconidae	Insecta		(same lot as) KNWR:Ento http://arctos.database.museum/guid/KNWR:Ento:10950	Joel Stone, Mariah McInnis, Matt Bowser	12	United States	Alaska	Soldotna, forest 1.6km southeast of Headquarters Lake, Slikok watershed project site MG34, east half of plot	50 m2 sweep net sample	7/21/2016	2016-07-21	2016-07-21	media	60.44483	-151.04167	10977464	wild caught	Arthropoda	Ephedrus		Animalia	Ephedrus lacertosus	UAM-2019.02-Slikok_Creek_bioinventory-Ento	MG34
http://creativecommons.org/licenses/by/3.0/	UAMObs:Ento:238944	Dictyna uncinata	Araneae	Dictynidae	Arachnida		(same lot as) KNWR:Ento http://arctos.database.museum/guid/KNWR:Ento:10885	Joel Stone, Dawn Magness	12	United States	Alaska	Soldotna, Ski Hill Road, Nordic View Trail by Nordic Lake, Slikok watershed project site SK15, east half of plot	50 m2 sweep net sample	6/17/2016	2016-06-17	2016-06-17	media	60.45028	-151.08681	10970678	wild caught	Arthropoda	Dictyna		Animalia	Dictyna uncinata	UAM-2019.02-Slikok_Creek_bioinventory-Ento	SK15
http://creativecommons.org/licenses/by/3.0/	UAMObs:Ento:238951	Hybotidae sp. BOLD:ACX4896	Diptera	Hybotidae	Insecta		(same lot as) KNWR:Ento http://arctos.database.museum/guid/KNWR:Ento:10885	Joel Stone, Dawn Magness	12	United States	Alaska	Soldotna, Ski Hill Road, Nordic View Trail by Nordic Lake, Slikok watershed project site SK15, east half of plot	50 m2 sweep net sample	6/17/2016	2016-06-17	2016-06-17	media	60.45028	-151.08681	10970678	wild caught	Arthropoda			Animalia	Hybotidae sp. BOLD:ACX4896	UAM-2019.02-Slikok_Creek_bioinventory-Ento	SK15
http://creativecommons.org/licenses/by/3.0/	UAMObs:Ento:238954	Nothodelphax sp. BOLD:ACU5128	Hemiptera	Delphacidae	Insecta		(same lot as) KNWR:Ento http://arctos.database.museum/guid/KNWR:Ento:10885	Joel Stone, Dawn Magness	12	United States	Alaska	Soldotna, Ski Hill Road, Nordic View Trail by Nordic Lake, Slikok watershed project site SK15, east half of plot	50 m2 sweep net sample	6/17/2016	2016-06-17	2016-06-17	media	60.45028	-151.08681	10970678	wild caught	Arthropoda	Nothodelphax		Animalia	Nothodelphax sp. BOLD:ACU5128	UAM-2019.02-Slikok_Creek_bioinventory-Ento	SK15
http://creativecommons.org/licenses/by/3.0/	UAMObs:Ento:238964	Dictyna arundinacea	Araneae	Dictynidae	Arachnida		(same lot as) KNWR:Ento http://arctos.database.museum/guid/KNWR:Ento:10887	Rebekah Brassfield, Todd Eskelin	12	United States	Alaska	Soldotna, wetland 490m south of Headquarters Lake, Slikok watershed project site SK16, east half of plot	50 m2 sweep net sample	6/16/2016	2016-06-16	2016-06-16	media	60.44989	-151.06859	10970680	wild caught	Arthropoda	Dictyna		Animalia	Dictyna arundinacea	UAM-2019.02-Slikok_Creek_bioinventory-Ento	SK16
http://creativecommons.org/licenses/by/3.0/	UAMObs:Ento:238965	Estrandia grandaeva	Araneae	Linyphiidae	Arachnida		(same lot as) KNWR:Ento http://arctos.database.museum/guid/KNWR:Ento:10887	Rebekah Brassfield, Todd Eskelin	12	United States	Alaska	Soldotna, wetland 490m south of Headquarters Lake, Slikok watershed project site SK16, east half of plot	50 m2 sweep net sample	6/16/2016	2016-06-16	2016-06-16	media	60.44989	-151.06859	10970680	wild caught	Arthropoda	Estrandia		Animalia	Estrandia grandaeva	UAM-2019.02-Slikok_Creek_bioinventory-Ento	SK16
http://creativecommons.org/licenses/by/3.0/	UAMObs:Ento:239927	Platypalpus sp. BOLD:AAV3699	Diptera	Hybotidae	Insecta		(same lot as) KNWR:Ento http://arctos.database.museum/guid/KNWR:Ento:10950	Joel Stone, Mariah McInnis, Matt Bowser	12	United States	Alaska	Soldotna, forest 1.6km southeast of Headquarters Lake, Slikok watershed project site MG34, east half of plot	50 m2 sweep net sample	7/21/2016	2016-07-21	2016-07-21	media	60.44483	-151.04167	10977464	wild caught	Arthropoda	Platypalpus		Animalia	Platypalpus sp. BOLD:AAV3699	UAM-2019.02-Slikok_Creek_bioinventory-Ento	MG34
http://creativecommons.org/licenses/by/3.0/	UAMObs:Ento:239929	Euthyneura sp. BOLD:AAF9859	Diptera	Hybotidae	Insecta		(same lot as) KNWR:Ento http://arctos.database.museum/guid/KNWR:Ento:10950	Joel Stone, Mariah McInnis, Matt Bowser	12	United States	Alaska	Soldotna, forest 1.6km southeast of Headquarters Lake, Slikok watershed project site MG34, east half of plot	50 m2 sweep net sample	7/21/2016	2016-07-21	2016-07-21	media	60.44483	-151.04167	10977464	wild caught	Arthropoda	Euthyneura		Animalia	Euthyneura sp. BOLD:AAF9859	UAM-2019.02-Slikok_Creek_bioinventory-Ento	MG34
http://creativecommons.org/licenses/by/3.0/	UAMObs:Ento:240048	Ochlerotatus communis	Diptera	Culicidae	Insecta		(same lot as) KNWR:Ento http://arctos.database.museum/guid/KNWR:Ento:10942	Joel Stone, Dawn Magness	12	United States	Alaska	Soldotna, forest 180m southwest of Nordic Lake, Slikok watershed project site MG29, east half of plot	50 m2 sweep net sample	6/17/2016	2016-06-17	2016-06-17	media	60.44581	-151.08721	10970735	wild caught	Arthropoda	Ochlerotatus		Animalia	Ochlerotatus communis	UAM-2019.02-Slikok_Creek_bioinventory-Ento	MG29
http://creativecommons.org/licenses/by/3.0/	UAMObs:Ento:240051	Bolitophila sp. BOLD:AAV0668	Diptera	Bolitophilidae	Insecta		(same lot as) KNWR:Ento http://arctos.database.museum/guid/KNWR:Ento:10942	Joel Stone, Dawn Magness	12	United States	Alaska	Soldotna, forest 180m southwest of Nordic Lake, Slikok watershed project site MG29, east half of plot	50 m2 sweep net sample	6/17/2016	2016-06-17	2016-06-17	media	60.44581	-151.08721	10970735	wild caught	Arthropoda	Bolitophila		Animalia	Bolitophila sp. BOLD:AAV0668	UAM-2019.02-Slikok_Creek_bioinventory-Ento	MG29
http://creativecommons.org/licenses/by/3.0/	UAMObs:Ento:240052	Cecidomyiidae sp. BOLD:AAQ0659	Diptera	Cecidomyiidae	Insecta		(same lot as) KNWR:Ento http://arctos.database.museum/guid/KNWR:Ento:10942	Joel Stone, Dawn Magness	12	United States	Alaska	Soldotna, forest 180m southwest of Nordic Lake, Slikok watershed project site MG29, east half of plot	50 m2 sweep net sample	6/17/2016	2016-06-17	2016-06-17	media	60.44581	-151.08721	10970735	wild caught	Arthropoda			Animalia	Cecidomyiidae sp. BOLD:AAQ0659	UAM-2019.02-Slikok_Creek_bioinventory-Ento	MG29
http://creativecommons.org/licenses/by/3.0/	UAMObs:Ento:240062	Platypalpus sp. BOLD:AAV3699	Diptera	Hybotidae	Insecta		(same lot as) KNWR:Ento http://arctos.database.museum/guid/KNWR:Ento:10952	Mariah McInnis, Matt Bowser	12	United States	Alaska	Soldotna, forest between Raven Ridge Trail and Central Peninsula landfill, Slikok watershed project site MG35, east half of plot	50 m2 sweep net sample	7/26/2016	2016-07-26	2016-07-26	media	60.44154	-151.09672	10977466	wild caught	Arthropoda	Platypalpus		Animalia	Platypalpus sp. BOLD:AAV3699	UAM-2019.02-Slikok_Creek_bioinventory-Ento	MG35
http://creativecommons.org/licenses/by/3.0/	UAMObs:Ento:239970	Calliphora terraenovae	Diptera	Calliphoridae	Insecta		(same lot as) KNWR:Ento http://arctos.database.museum/guid/KNWR:Ento:10962	Matt Bowser	12	United States	Alaska	Soldotna, Ski Hill Road, forest 840m northeast of Headquarters Lake, Slikok watershed project site SK04, east half of plot	50 m2 sweep net sample	7/19/2016	2016-07-19	2016-07-19	media	60.46735	-151.04875	10977476	wild caught	Arthropoda	Calliphora		Animalia	Calliphora terraenovae	UAM-2019.02-Slikok_Creek_bioinventory-Ento	SK04
http://creativecommons.org/licenses/by/3.0/	UAMObs:Ento:239030	Chamaemyia paludosa	Diptera	Chamaemyiidae	Insecta		(same lot as) KNWR:Ento http://arctos.database.museum/guid/KNWR:Ento:10895	Matt Bowser, Todd Eskelin	12	United States	Alaska	Soldotna, stream 1.7km south-southeast of Headquarters Lake, Slikok watershed project site SK24, east half of plot	50 m2 sweep net sample	6/15/2016	2016-06-15	2016-06-15	media	60.44056	-151.05118	10970688	wild caught	Arthropoda	Chamaemyia		Animalia	Chamaemyia paludosa	UAM-2019.02-Slikok_Creek_bioinventory-Ento	SK24
http://creativecommons.org/licenses/by/3.0/	UAMObs:Ento:239032	Clubiona riparia	Araneae	Clubionidae	Arachnida		(same lot as) KNWR:Ento http://arctos.database.museum/guid/KNWR:Ento:10895	Matt Bowser, Todd Eskelin	12	United States	Alaska	Soldotna, stream 1.7km south-southeast of Headquarters Lake, Slikok watershed project site SK24, east half of plot	50 m2 sweep net sample	6/15/2016	2016-06-15	2016-06-15	media	60.44056	-151.05118	10970688	wild caught	Arthropoda	Clubiona		Animalia	Clubiona riparia	UAM-2019.02-Slikok_Creek_bioinventory-Ento	SK24
http://creativecommons.org/licenses/by/3.0/	UAMObs:Ento:239034	Delia echinata	Diptera	Anthomyiidae	Insecta		(same lot as) KNWR:Ento http://arctos.database.museum/guid/KNWR:Ento:10895	Matt Bowser, Todd Eskelin	12	United States	Alaska	Soldotna, stream 1.7km south-southeast of Headquarters Lake, Slikok watershed project site SK24, east half of plot	50 m2 sweep net sample	6/15/2016	2016-06-15	2016-06-15	media	60.44056	-151.05118	10970688	wild caught	Arthropoda	Delia		Animalia	Delia echinata	UAM-2019.02-Slikok_Creek_bioinventory-Ento	SK24
http://creativecommons.org/publicdomain/zero/1.0/	KNWRObs:Herb:478	Vaccinium oxycoccos	Ericales	Ericaceae	Magnoliopsida			Matt Bowser	20	United States	Alaska	Soldotna, wetland 490m south of Headquarters Lake, Slikok watershed project site SK16		8/3/2016	2016-08-03	2016-08-03	media	60.44989	-151.06859	10975228		Tracheophyta	Vaccinium		Plantae	Vaccinium oxycoccos	KNWR-2016.01-Slikok-ObsHerb	SK16
http://creativecommons.org/publicdomain/zero/1.0/	KNWRObs:Herb:483	Chamerion angustifolium	Myrtales	Onagraceae	Magnoliopsida			Matt Bowser	20	United States	Alaska	Soldotna, 210m east-southeast of intersection of Sterling Highway and south end of Ski Hill Road, Slikok watershed project site MG16		8/9/2016	2016-08-09	2016-08-09	media	60.45494	-151.09552	10975204		Tracheophyta	Chamerion		Plantae	Chamerion angustifolium	KNWR-2016.01-Slikok-ObsHerb	MG16
http://creativecommons.org/publicdomain/zero/1.0/	KNWRObs:Herb:493	Cornus canadensis	Cornales	Cornaceae	Magnoliopsida			Matt Bowser	20	United States	Alaska	Soldotna, forest 180m southwest of Nordic Lake, Slikok watershed project site MG29		8/9/2016	2016-08-09	2016-08-09	media	60.44581	-151.08721	10975214		Tracheophyta	Cornus		Plantae	Cornus canadensis	KNWR-2016.01-Slikok-ObsHerb	MG29
http://creativecommons.org/publicdomain/zero/1.0/	KNWRObs:Herb:498	Hylocomium splendens	Hypnales	Hylocomiaceae	Bryopsida			Matt Bowser	20	United States	Alaska	Soldotna, forest 180m southwest of Nordic Lake, Slikok watershed project site MG29		8/9/2016	2016-08-09	2016-08-09	media	60.44581	-151.08721	10975214		Bryophyta	Hylocomium		Plantae	Hylocomium splendens	KNWR-2016.01-Slikok-ObsHerb	MG29
http://creativecommons.org/publicdomain/zero/1.0/	KNWRObs:Herb:389	Vaccinium vitis-idaea	Ericales	Ericaceae	Magnoliopsida			Matt Bowser	20	United States	Alaska	Soldotna, forest 600m south-southeast of Headquarters Lake, Slikok watershed project site MG26		7/20/2016	2016-07-20	2016-07-20	media	60.44969	-151.05948	10975212		Tracheophyta	Vaccinium		Plantae	Vaccinium vitis-idaea	KNWR-2016.01-Slikok-ObsHerb	MG26
http://creativecommons.org/publicdomain/zero/1.0/	KNWRObs:Herb:413	Pleurozium schreberi	Hypnales	Hylocomiaceae	Bryopsida			Matt Bowser	20	United States	Alaska	Soldotna, muskeg 600m south of Nordic Lake, Slikok watershed project site MG37		8/3/2016	2016-08-03	2016-08-03	media	60.44115	-151.07851	10975221		Bryophyta	Pleurozium		Plantae	Pleurozium schreberi	KNWR-2016.01-Slikok-ObsHerb	MG37
http://creativecommons.org/publicdomain/zero/1.0/	KNWRObs:Herb:383	Carex tenuiflora	Poales	Cyperaceae	Liliopsida			Matt Bowser	20	United States	Alaska	Soldotna, muskeg 40m east of Headquarters Lake, Slikok watershed project site MG14		7/18/2016	2016-07-18	2016-07-18	media	60.45862	-151.05868	10975203		Tracheophyta	Carex		Plantae	Carex tenuiflora	KNWR-2016.01-Slikok-ObsHerb	MG14
http://creativecommons.org/publicdomain/zero/1.0/	KNWRObs:Herb:424	Rubus pedatus	Rosales	Rosaceae	Magnoliopsida			Matt Bowser	20	United States	Alaska	Soldotna, forest 880m southeast of Nordic Lake, Slikok watershed project site SK23		8/3/2016	2016-08-03	2016-08-03	media	60.44095	-151.0694	10975231		Tracheophyta	Rubus		Plantae	Rubus pedatus	KNWR-2016.01-Slikok-ObsHerb	SK23
http://creativecommons.org/publicdomain/zero/1.0/	KNWRObs:Herb:427	Streptopus amplexifolius	Liliales	Liliaceae	Liliopsida			Matt Bowser	20	United States	Alaska	Soldotna, forest 880m southeast of Nordic Lake, Slikok watershed project site SK23		8/3/2016	2016-08-03	2016-08-03	media	60.44095	-151.0694	10975231		Tracheophyta	Streptopus		Plantae	Streptopus amplexifolius	KNWR-2016.01-Slikok-ObsHerb	SK23
http://creativecommons.org/publicdomain/zero/1.0/	KNWRObs:Herb:429	Picea mariana	Pinales, Coniferales	Pinaceae	Coniferopsida, Pinopsida			Matt Bowser	20	United States	Alaska	Soldotna, muskeg 40m east of Headquarters Lake, Slikok watershed project site MG14		7/18/2016	2016-07-18	2016-07-18	media	60.45862	-151.05868	10975203		Tracheophyta	Picea		Plantae	Picea mariana	KNWR-2016.01-Slikok-ObsHerb	MG14
http://creativecommons.org/publicdomain/zero/1.0/	KNWRObs:Herb:431	Rubus chamaemorus	Rosales	Rosaceae	Magnoliopsida			Matt Bowser	20	United States	Alaska	Soldotna, muskeg 40m east of Headquarters Lake, Slikok watershed project site MG14		7/18/2016	2016-07-18	2016-07-18	media	60.45862	-151.05868	10975203		Tracheophyta	Rubus		Plantae	Rubus chamaemorus	KNWR-2016.01-Slikok-ObsHerb	MG14
http://creativecommons.org/publicdomain/zero/1.0/	KNWRObs:Herb:432	Salix barclayi	Malpighiales	Salicaceae	Magnoliopsida			Matt Bowser	20	United States	Alaska	Soldotna, muskeg 40m east of Headquarters Lake, Slikok watershed project site MG14		7/18/2016	2016-07-18	2016-07-18	media	60.45862	-151.05868	10975203		Tracheophyta	Salix		Plantae	Salix barclayi	KNWR-2016.01-Slikok-ObsHerb	MG14
http://creativecommons.org/publicdomain/zero/1.0/	KNWRObs:Herb:511	Sphagnum	Sphagnales	Sphagnaceae	Sphagnopsida			Matt Bowser	20	United States	Alaska	Soldotna, forest 1.5km south of Headquarters Lake, Slikok watershed project site MG39		7/29/2016	2016-07-29	2016-07-29	media	60.44076	-151.06029	10975222		Bryophyta	Sphagnum		Plantae		KNWR-2016.01-Slikok-ObsHerb	MG39
http://creativecommons.org/publicdomain/zero/1.0/	KNWRObs:Herb:512	Ledum palustre	Ericales	Ericaceae	Magnoliopsida			Matt Bowser	20	United States	Alaska	Soldotna, forest 1.5km south of Headquarters Lake, Slikok watershed project site MG39		7/29/2016	2016-07-29	2016-07-29	media	60.44076	-151.06029	10975222		Tracheophyta	Ledum		Plantae	Ledum palustre	KNWR-2016.01-Slikok-ObsHerb	MG39
http://creativecommons.org/publicdomain/zero/1.0/	KNWRObs:Herb:803	Equisetum fluviatile	Equisetales	Equisetaceae	Equisetopsida			Matt Bowser	20	United States	Alaska	Soldotna, stream 1.7km south-southeast of Headquarters Lake, Slikok watershed project site SK24		7/29/2016	2016-07-29	2016-07-29	media	60.44056	-151.05118	10975232		Tracheophyta	Equisetum		Plantae	Equisetum fluviatile	KNWR-2016.01-Slikok-ObsHerb	SK24
http://creativecommons.org/publicdomain/zero/1.0/	KNWRObs:Herb:808	Salix commutata	Malpighiales	Salicaceae	Magnoliopsida			Matt Bowser	20	United States	Alaska	Soldotna, stream 1.7km south-southeast of Headquarters Lake, Slikok watershed project site SK24		7/29/2016	2016-07-29	2016-07-29	media	60.44056	-151.05118	10975232		Tracheophyta	Salix		Plantae	Salix commutata	KNWR-2016.01-Slikok-ObsHerb	SK24
http://creativecommons.org/publicdomain/zero/1.0/	KNWRObs:Herb:814	Cornus canadensis	Cornales	Cornaceae	Magnoliopsida			Matt Bowser	20	United States	Alaska	Soldotna, forest 2.3km southeast of Headquarters Lake, Slikok watershed project site SK25		7/21/2016	2016-07-21	2016-07-21	media	60.44016	-151.03297	10975233		Tracheophyta	Cornus		Plantae	Cornus canadensis	KNWR-2016.01-Slikok-ObsHerb	SK25
http://creativecommons.org/publicdomain/zero/1.0/	KNWRObs:Herb:817	Gymnocarpium dryopteris	Polypodiales	Dryopteridaceae	Filicopsida			Matt Bowser	20	United States	Alaska	Soldotna, forest 2.3km southeast of Headquarters Lake, Slikok watershed project site SK25		7/21/2016	2016-07-21	2016-07-21	media	60.44016	-151.03297	10975233		Tracheophyta	Gymnocarpium		Plantae	Gymnocarpium dryopteris	KNWR-2016.01-Slikok-ObsHerb	SK25
http://creativecommons.org/publicdomain/zero/1.0/	KNWRObs:Herb:820	Listera cordata	Asparagales	Orchidaceae	Liliopsida			Matt Bowser	20	United States	Alaska	Soldotna, forest 2.3km southeast of Headquarters Lake, Slikok watershed project site SK25		7/21/2016	2016-07-21	2016-07-21	media	60.44016	-151.03297	10975233		Tracheophyta	Listera		Plantae	Listera cordata	KNWR-2016.01-Slikok-ObsHerb	SK25
http://creativecommons.org/publicdomain/zero/1.0/	KNWRObs:Herb:823	Picea glauca	Pinales, Coniferales	Pinaceae	Coniferopsida, Pinopsida			Matt Bowser	20	United States	Alaska	Soldotna, forest 2.3km southeast of Headquarters Lake, Slikok watershed project site SK25		7/21/2016	2016-07-21	2016-07-21	media	60.44016	-151.03297	10975233		Tracheophyta	Picea		Plantae	Picea glauca	KNWR-2016.01-Slikok-ObsHerb	SK25
http://creativecommons.org/publicdomain/zero/1.0/	KNWRObs:Herb:656	Linnaea borealis	Dipsacales	Caprifoliaceae	Magnoliopsida			Matt Bowser	20	United States	Alaska	Soldotna, forest 980m south of Headquarters Lake, Slikok watershed project site MG31		7/29/2016	2016-07-29	2016-07-29	media	60.44542	-151.069	10975216		Tracheophyta	Linnaea		Plantae	Linnaea borealis	KNWR-2016.01-Slikok-ObsHerb	MG31
http://creativecommons.org/publicdomain/zero/1.0/	KNWRObs:Herb:664	Lobaria pulmonaria			Lecanoromycetes			Matt Bowser	20	United States	Alaska	Soldotna, Ski Hill Road, off of Centennial Trail 480m northeast of Kenai National Wildlife Refuge headquarters building, Slikok watershed project site SK03		7/19/2016	2016-07-19	2016-07-19	media	60.46775	-151.06698	10975224		Ascomycota	Lobaria		Fungi	Lobaria pulmonaria	KNWR-2016.01-Slikok-ObsHerb	SK03
http://creativecommons.org/publicdomain/zero/1.0/	KNWRObs:Herb:659	Goodyera repens	Asparagales	Orchidaceae	Liliopsida			Matt Bowser	20	United States	Alaska	Soldotna, Ski Hill Road, off of Centennial Trail 480m northeast of Kenai National Wildlife Refuge headquarters building, Slikok watershed project site SK03		7/19/2016	2016-07-19	2016-07-19	media	60.46775	-151.06698	10975224		Tracheophyta	Goodyera		Plantae	Goodyera repens	KNWR-2016.01-Slikok-ObsHerb	SK03
http://creativecommons.org/publicdomain/zero/1.0/	KNWRObs:Herb:670	Populus hastata	Malpighiales	Salicaceae	Magnoliopsida			Matt Bowser	20	United States	Alaska	Soldotna, Ski Hill Road, off of Centennial Trail 480m northeast of Kenai National Wildlife Refuge headquarters building, Slikok watershed project site SK03		7/19/2016	2016-07-19	2016-07-19	media	60.46775	-151.06698	10975224		Tracheophyta	Populus		Plantae	Populus hastata	KNWR-2016.01-Slikok-ObsHerb	SK03
http://creativecommons.org/publicdomain/zero/1.0/	KNWRObs:Herb:683	Ptilium crista-castrensis	Hypnales	Ptiliidae	Bryopsida			Matt Bowser	20	United States	Alaska	Soldotna, Ski Hill Road, Slikok watershed project site MG05		7/22/2016	2016-07-22	2016-07-22	media	60.46368	-151.08561	10975196		Bryophyta	Ptilium		Plantae	Ptilium crista-castrensis	KNWR-2016.01-Slikok-ObsHerb	MG05
http://creativecommons.org/publicdomain/zero/1.0/	KNWRObs:Herb:686	Geocaulon lividum	Santalales	Santalaceae	Magnoliopsida			Matt Bowser	20	United States	Alaska	Soldotna, in wetland 510m southwest of Headquarters Lake, Slikok watershed project site MG18		8/1/2016	2016-08-01	2016-08-01	media	60.45455	-151.0773	10975206		Tracheophyta	Geocaulon		Plantae	Geocaulon lividum	KNWR-2016.01-Slikok-ObsHerb	MG18
http://creativecommons.org/publicdomain/zero/1.0/	KNWRObs:Herb:692	Sphagnum	Sphagnales	Sphagnaceae	Sphagnopsida			Matt Bowser	20	United States	Alaska	Soldotna, in wetland 510m southwest of Headquarters Lake, Slikok watershed project site MG18		8/1/2016	2016-08-01	2016-08-01	media	60.45455	-151.0773	10975206		Bryophyta	Sphagnum		Plantae		KNWR-2016.01-Slikok-ObsHerb	MG18
http://creativecommons.org/publicdomain/zero/1.0/	KNWRObs:Herb:700	Picea mariana	Pinales, Coniferales	Pinaceae	Coniferopsida, Pinopsida			Matt Bowser	20	United States	Alaska	Soldotna, forest 980m south of Headquarters Lake, Slikok watershed project site MG31		7/29/2016	2016-07-29	2016-07-29	media	60.44542	-151.069	10975216		Tracheophyta	Picea		Plantae	Picea mariana	KNWR-2016.01-Slikok-ObsHerb	MG31
http://creativecommons.org/publicdomain/zero/1.0/	KNWRObs:Herb:720	Gymnocarpium dryopteris	Polypodiales	Dryopteridaceae	Filicopsida			Matt Bowser	20	United States	Alaska	Soldotna, Ski Hill Road, forest 840m northeast of Headquarters Lake, Slikok watershed project site SK04		7/19/2016	2016-07-19	2016-07-19	media	60.46735	-151.04875	10975225		Tracheophyta	Gymnocarpium		Plantae	Gymnocarpium dryopteris	KNWR-2016.01-Slikok-ObsHerb	SK04
http://creativecommons.org/publicdomain/zero/1.0/	KNWRObs:Herb:721	Ribes triste	Saxifragales	Grossulariaceae	Magnoliopsida			Matt Bowser	20	United States	Alaska	Soldotna, Ski Hill Road, Slikok watershed project site MG05		7/22/2016	2016-07-22	2016-07-22	media	60.46368	-151.08561	10975196		Tracheophyta	Ribes		Plantae	Ribes triste	KNWR-2016.01-Slikok-ObsHerb	MG05
http://creativecommons.org/publicdomain/zero/1.0/	KNWRObs:Herb:727	Vaccinium vitis-idaea	Ericales	Ericaceae	Magnoliopsida			Matt Bowser	20	United States	Alaska	Soldotna, Ski Hill Road, Slikok watershed project site MG05		7/22/2016	2016-07-22	2016-07-22	media	60.46368	-151.08561	10975196		Tracheophyta	Vaccinium		Plantae	Vaccinium vitis-idaea	KNWR-2016.01-Slikok-ObsHerb	MG05
http://creativecommons.org/publicdomain/zero/1.0/	KNWRObs:Herb:736	Ledum palustre	Ericales	Ericaceae	Magnoliopsida			Matt Bowser	20	United States	Alaska	Soldotna, shore of southeastern bay of Headquarters Lake, Slikok watershed project site MG19		8/3/2016	2016-08-03	2016-08-03	media	60.45435	-151.06819	10975207		Tracheophyta	Ledum		Plantae	Ledum palustre	KNWR-2016.01-Slikok-ObsHerb	MG19
http://creativecommons.org/publicdomain/zero/1.0/	KNWRObs:Herb:738	Picea mariana	Pinales, Coniferales	Pinaceae	Coniferopsida, Pinopsida			Matt Bowser	20	United States	Alaska	Soldotna, shore of southeastern bay of Headquarters Lake, Slikok watershed project site MG19		8/3/2016	2016-08-03	2016-08-03	media	60.45435	-151.06819	10975207		Tracheophyta	Picea		Plantae	Picea mariana	KNWR-2016.01-Slikok-ObsHerb	MG19
http://creativecommons.org/publicdomain/zero/1.0/	KNWRObs:Herb:746	Andromeda polifolia	Ericales	Ericaceae	Magnoliopsida			Matt Bowser	20	United States	Alaska	Soldotna, muskeg 230m southeast of Headquarters Lake, Slikok watershed project site MG20		7/20/2016	2016-07-20	2016-07-20	media	60.45415	-151.05908	10975208		Tracheophyta	Andromeda		Plantae	Andromeda polifolia	KNWR-2016.01-Slikok-ObsHerb	MG20
http://creativecommons.org/publicdomain/zero/1.0/	KNWRObs:Herb:750	Calamagrostis canadensis	Poales	Poaceae	Liliopsida			Matt Bowser	20	United States	Alaska	Soldotna, forest 1km south of Headquarters Lake, Slikok watershed project site MG32		7/29/2016	2016-07-29	2016-07-29	media	60.44522	-151.05989	10975217		Tracheophyta	Calamagrostis		Plantae	Calamagrostis canadensis	KNWR-2016.01-Slikok-ObsHerb	MG32
http://creativecommons.org/publicdomain/zero/1.0/	KNWRObs:Herb:756	Vaccinium uliginosum	Ericales	Ericaceae	Magnoliopsida			Matt Bowser	20	United States	Alaska	Soldotna, forest 980m south of Headquarters Lake, Slikok watershed project site MG31		7/29/2016	2016-07-29	2016-07-29	media	60.44542	-151.069	10975216		Tracheophyta	Vaccinium		Plantae	Vaccinium uliginosum	KNWR-2016.01-Slikok-ObsHerb	MG31
http://creativecommons.org/publicdomain/zero/1.0/	KNWRObs:Herb:762	Lycopodium annotinum	Lycopodiales	Lycopodiaceae	Lycopodiopsida			Matt Bowser	20	United States	Alaska	Soldotna, Ski Hill Road, forest 840m northeast of Headquarters Lake, Slikok watershed project site SK04		7/19/2016	2016-07-19	2016-07-19	media	60.46735	-151.04875	10975225		Tracheophyta	Lycopodium		Plantae	Lycopodium annotinum	KNWR-2016.01-Slikok-ObsHerb	SK04
http://creativecommons.org/publicdomain/zero/1.0/	KNWRObs:Herb:764	Peltigera	Lecanorales	Peltigeraceae	Lecanoromycetes			Matt Bowser	20	United States	Alaska	Soldotna, Ski Hill Road, forest 840m northeast of Headquarters Lake, Slikok watershed project site SK04		7/19/2016	2016-07-19	2016-07-19	media	60.46735	-151.04875	10975225		Ascomycota	Peltigera		Fungi		KNWR-2016.01-Slikok-ObsHerb	SK04
http://creativecommons.org/publicdomain/zero/1.0/	KNWRObs:Herb:774	Equisetum sylvaticum	Equisetales	Equisetaceae	Equisetopsida			Matt Bowser	20	United States	Alaska	Soldotna, Ski Hill Road, ski trails between new visitor center and old septic leach field, Slikok watershed project site MG06		07/18/16	2016-07-18	2016-07-18	media	60.46348	-151.0765	11339318		Tracheophyta	Equisetum		Plantae	Equisetum sylvaticum	KNWR-2016.01-Slikok-ObsHerb	MG06
http://creativecommons.org/publicdomain/zero/1.0/	KNWRObs:Herb:520	Pleurozium schreberi	Hypnales	Hylocomiaceae	Bryopsida			Matt Bowser	20	United States	Alaska	Soldotna, Ski Hill Road, Centennial Trail north of Headquarters Lake, Slikok watershed project site MG02		7/19/2016	2016-07-19	2016-07-19	media	60.46755	-151.05787	10975194		Bryophyta	Pleurozium		Plantae	Pleurozium schreberi	KNWR-2016.01-Slikok-ObsHerb	MG02
http://creativecommons.org/publicdomain/zero/1.0/	KNWRObs:Herb:522	Pyrola asarifolia	Ericales	Ericaceae	Magnoliopsida			Matt Bowser	20	United States	Alaska	Soldotna, Ski Hill Road, Centennial Trail north of Headquarters Lake, Slikok watershed project site MG02		7/19/2016	2016-07-19	2016-07-19	media	60.46755	-151.05787	10975194		Tracheophyta	Pyrola		Plantae	Pyrola asarifolia	KNWR-2016.01-Slikok-ObsHerb	MG02
http://creativecommons.org/publicdomain/zero/1.0/	KNWRObs:Herb:523	Rosa acicularis	Rosales	Rosaceae	Magnoliopsida			Matt Bowser	20	United States	Alaska	Soldotna, Ski Hill Road, Centennial Trail north of Headquarters Lake, Slikok watershed project site MG02		7/19/2016	2016-07-19	2016-07-19	media	60.46755	-151.05787	10975194		Tracheophyta	Rosa		Plantae	Rosa acicularis	KNWR-2016.01-Slikok-ObsHerb	MG02
http://creativecommons.org/publicdomain/zero/1.0/	KNWRObs:Herb:534	Pyrola asarifolia	Ericales	Ericaceae	Magnoliopsida			Matt Bowser	20	United States	Alaska	Soldotna, 210m east-southeast of intersection of Sterling Highway and south end of Ski Hill Road, Slikok watershed project site MG16		8/9/2016	2016-08-09	2016-08-09	media	60.45494	-151.09552	10975204		Tracheophyta	Pyrola		Plantae	Pyrola asarifolia	KNWR-2016.01-Slikok-ObsHerb	MG16
http://creativecommons.org/publicdomain/zero/1.0/	KNWRObs:Herb:651	Goodyera repens	Asparagales	Orchidaceae	Liliopsida			Matt Bowser	20	United States	Alaska	Soldotna, forest 980m south of Headquarters Lake, Slikok watershed project site MG31		7/29/2016	2016-07-29	2016-07-29	media	60.44542	-151.069	10975216		Tracheophyta	Goodyera		Plantae	Goodyera repens	KNWR-2016.01-Slikok-ObsHerb	MG31
http://creativecommons.org/publicdomain/zero/1.0/	KNWRObs:Herb:554	Betula glandulosa	Fagales	Betulaceae	Magnoliopsida			Matt Bowser	20	United States	Alaska	Soldotna, forest 180m south-southeast of Nordic Lake, Slikok watershed project site MG30		8/3/2016	2016-08-03	2016-08-03	media	60.44562	-151.0781	10975215		Tracheophyta	Betula		Plantae	Betula glandulosa	KNWR-2016.01-Slikok-ObsHerb	MG30
http://creativecommons.org/publicdomain/zero/1.0/	KNWRObs:Herb:590	Hylocomium splendens	Hypnales	Hylocomiaceae	Bryopsida			Matt Bowser	20	United States	Alaska	Soldotna, Ski Hill Road, off of Howling Hill Trail, Slikok watershed project site MG17		8/9/2016	2016-08-09	2016-08-09	media	60.45475	-151.08641	10975205		Bryophyta	Hylocomium		Plantae	Hylocomium splendens	KNWR-2016.01-Slikok-ObsHerb	MG17
http://creativecommons.org/publicdomain/zero/1.0/	KNWRObs:Herb:600	Pleurozium schreberi	Hypnales	Hylocomiaceae	Bryopsida			Matt Bowser	20	United States	Alaska	Soldotna, forest 180m south-southeast of Nordic Lake, Slikok watershed project site MG30		8/3/2016	2016-08-03	2016-08-03	media	60.44562	-151.0781	10975215		Bryophyta	Pleurozium		Plantae	Pleurozium schreberi	KNWR-2016.01-Slikok-ObsHerb	MG30
http://creativecommons.org/publicdomain/zero/1.0/	KNWRObs:Herb:605	Picea glauca	Pinales, Coniferales	Pinaceae	Coniferopsida, Pinopsida			Matt Bowser	20	United States	Alaska	Soldotna, forest 2km southeast of Headquarters Lake, Slikok watershed project site MG41		7/21/2016	2016-07-21	2016-07-21	media	60.44036	-151.04208	10975223		Tracheophyta	Picea		Plantae	Picea glauca	KNWR-2016.01-Slikok-ObsHerb	MG41
http://creativecommons.org/publicdomain/zero/1.0/	KNWRObs:Herb:611	Trientalis europaea	Ericales	Primulaceae	Magnoliopsida			Matt Bowser	20	United States	Alaska	Soldotna, forest 2km southeast of Headquarters Lake, Slikok watershed project site MG41		7/21/2016	2016-07-21	2016-07-21	media	60.44036	-151.04208	10975223		Tracheophyta	Trientalis		Plantae	Trientalis europaea	KNWR-2016.01-Slikok-ObsHerb	MG41
http://creativecommons.org/publicdomain/zero/1.0/	KNWRObs:Herb:629	Cornus canadensis	Cornales	Cornaceae	Magnoliopsida			Matt Bowser	20	United States	Alaska	Soldotna, Ski Hill Road, Slikok watershed project site MG05		7/22/2016	2016-07-22	2016-07-22	media	60.46368	-151.08561	10975196		Tracheophyta	Cornus		Plantae	Cornus canadensis	KNWR-2016.01-Slikok-ObsHerb	MG05
http://creativecommons.org/publicdomain/zero/1.0/	KNWRObs:Herb:643	Betula glandulosa	Fagales	Betulaceae	Magnoliopsida			Matt Bowser	20	United States	Alaska	Soldotna, in wetland 510m southwest of Headquarters Lake, Slikok watershed project site MG18		8/1/2016	2016-08-01	2016-08-01	media	60.45455	-151.0773	10975206		Tracheophyta	Betula		Plantae	Betula glandulosa	KNWR-2016.01-Slikok-ObsHerb	MG18
http://creativecommons.org/publicdomain/zero/1.0/	KNWRObs:Herb:645	Cornus canadensis	Cornales	Cornaceae	Magnoliopsida			Matt Bowser	20	United States	Alaska	Soldotna, forest 980m south of Headquarters Lake, Slikok watershed project site MG31		7/29/2016	2016-07-29	2016-07-29	media	60.44542	-151.069	10975216		Tracheophyta	Cornus		Plantae	Cornus canadensis	KNWR-2016.01-Slikok-ObsHerb	MG31
http://creativecommons.org/publicdomain/zero/1.0/	KNWRObs:Herb:647	Equisetum pratense	Equisetales	Equisetaceae	Equisetopsida			Matt Bowser	20	United States	Alaska	Soldotna, forest 980m south of Headquarters Lake, Slikok watershed project site MG31		7/29/2016	2016-07-29	2016-07-29	media	60.44542	-151.069	10975216		Tracheophyta	Equisetum		Plantae	Equisetum pratense	KNWR-2016.01-Slikok-ObsHerb	MG31
http://creativecommons.org/licenses/by/3.0/	UAMObs:Ento:239995	Corynoptera sp. BOLD:ADC2113	Diptera	Sciaridae	Insecta		(same lot as) KNWR:Ento http://arctos.database.museum/guid/KNWR:Ento:10952	Mariah McInnis, Matt Bowser	12	United States	Alaska	Soldotna, forest between Raven Ridge Trail and Central Peninsula landfill, Slikok watershed project site MG35, east half of plot	50 m2 sweep net sample	7/26/2016	2016-07-26	2016-07-26	media	60.44154	-151.09672	10977466	wild caught	Arthropoda	Corynoptera		Animalia	Corynoptera sp. BOLD:ADC2113	UAM-2019.02-Slikok_Creek_bioinventory-Ento	MG35
http://creativecommons.org/licenses/by/3.0/	UAMObs:Ento:239997	Coenosia conforma	Diptera	Muscidae	Insecta		(same lot as) KNWR:Ento http://arctos.database.museum/guid/KNWR:Ento:10962	Matt Bowser	12	United States	Alaska	Soldotna, Ski Hill Road, forest 840m northeast of Headquarters Lake, Slikok watershed project site SK04, east half of plot	50 m2 sweep net sample	7/19/2016	2016-07-19	2016-07-19	media	60.46735	-151.04875	10977476	wild caught	Arthropoda	Coenosia		Animalia	Coenosia conforma	UAM-2019.02-Slikok_Creek_bioinventory-Ento	SK04
http://creativecommons.org/licenses/by/3.0/	UAMObs:Ento:240002	Megaselia sp. BOLD:AAL9073	Diptera	Phoridae	Insecta		(same lot as) KNWR:Ento http://arctos.database.museum/guid/KNWR:Ento:10962	Matt Bowser	12	United States	Alaska	Soldotna, Ski Hill Road, forest 840m northeast of Headquarters Lake, Slikok watershed project site SK04, east half of plot	50 m2 sweep net sample	7/19/2016	2016-07-19	2016-07-19	media	60.46735	-151.04875	10977476	wild caught	Arthropoda	Megaselia		Animalia	Megaselia sp. BOLD:AAL9073	UAM-2019.02-Slikok_Creek_bioinventory-Ento	SK04
http://creativecommons.org/licenses/by/3.0/	UAMObs:Ento:239048	Macrosiphum euphorbiae	Hemiptera	Aphididae	Insecta		(same lot as) KNWR:Ento http://arctos.database.museum/guid/KNWR:Ento:10895	Matt Bowser, Todd Eskelin	12	United States	Alaska	Soldotna, stream 1.7km south-southeast of Headquarters Lake, Slikok watershed project site SK24, east half of plot	50 m2 sweep net sample	6/15/2016	2016-06-15	2016-06-15	media	60.44056	-151.05118	10970688	wild caught	Arthropoda	Macrosiphum		Animalia	Macrosiphum euphorbiae	UAM-2019.02-Slikok_Creek_bioinventory-Ento	SK24
http://creativecommons.org/licenses/by/3.0/	UAMObs:Ento:239054	Platypalpus xanthopodus	Diptera	Hybotidae	Insecta		(same lot as) KNWR:Ento http://arctos.database.museum/guid/KNWR:Ento:10895	Matt Bowser, Todd Eskelin	12	United States	Alaska	Soldotna, stream 1.7km south-southeast of Headquarters Lake, Slikok watershed project site SK24, east half of plot	50 m2 sweep net sample	6/15/2016	2016-06-15	2016-06-15	media	60.44056	-151.05118	10970688	wild caught	Arthropoda	Platypalpus		Animalia	Platypalpus xanthopodus	UAM-2019.02-Slikok_Creek_bioinventory-Ento	SK24
http://creativecommons.org/licenses/by/3.0/	UAMObs:Ento:239581	Sciaridae sp. BOLD:ACB9102	Diptera	Sciaridae	Insecta		(same lot as) KNWR:Ento http://arctos.database.museum/guid/KNWR:Ento:10952	Mariah McInnis, Matt Bowser	12	United States	Alaska	Soldotna, forest between Raven Ridge Trail and Central Peninsula landfill, Slikok watershed project site MG35, east half of plot	50 m2 sweep net sample	7/26/2016	2016-07-26	2016-07-26	media	60.44154	-151.09672	10977466	wild caught	Arthropoda			Animalia	Sciaridae sp. BOLD:ACB9102	UAM-2019.02-Slikok_Creek_bioinventory-Ento	MG35
http://creativecommons.org/licenses/by/3.0/	UAMObs:Ento:239612	Ochlerotatus communis	Diptera	Culicidae	Insecta		(same lot as) KNWR:Ento http://arctos.database.museum/guid/KNWR:Ento:10944	Matt Bowser, Todd Eskelin	12	United States	Alaska	Soldotna, forest 2.3km southeast of Headquarters Lake, Slikok watershed project site SK25, east half of plot	50 m2 sweep net sample	6/17/2016	2016-06-17	2016-06-17	media	60.44016	-151.03297	10970737	wild caught	Arthropoda	Ochlerotatus		Animalia	Ochlerotatus communis	UAM-2019.02-Slikok_Creek_bioinventory-Ento	SK25
http://creativecommons.org/licenses/by/3.0/	UAMObs:Ento:239619	Pipunculus campestris	Diptera	Pipunculidae	Insecta		(same lot as) KNWR:Ento http://arctos.database.museum/guid/KNWR:Ento:10954	Mariah McInnis, Matt Bowser	12	United States	Alaska	Soldotna, muskeg 600m south of Nordic Lake, Slikok watershed project site MG37, east half of plot	50 m2 sweep net sample	8/3/2016	2016-08-03	2016-08-03	media	60.44115	-151.07851	10977468	wild caught	Arthropoda	Pipunculus		Animalia	Pipunculus campestris	UAM-2019.02-Slikok_Creek_bioinventory-Ento	MG37
http://creativecommons.org/licenses/by/3.0/	UAMObs:Ento:239624	Chalarus decorus	Diptera	Pipunculidae	Insecta		(same lot as) KNWR:Ento http://arctos.database.museum/guid/KNWR:Ento:10964	Joel Stone, Matt Bowser	12	United States	Alaska	Soldotna, Ski Hill Road, Slikok watershed project site SK08, east half of plot	50 m2 sweep net sample	7/22/2016	2016-07-22	2016-07-22	media	60.45921	-151.08601	10977478	wild caught	Arthropoda	Chalarus		Animalia	Chalarus decorus	UAM-2019.02-Slikok_Creek_bioinventory-Ento	SK08
http://creativecommons.org/licenses/by/3.0/	UAMObs:Ento:239627	Corynoptera sp. BOLD:ADC2113	Diptera	Sciaridae	Insecta		(same lot as) KNWR:Ento http://arctos.database.museum/guid/KNWR:Ento:10964	Joel Stone, Matt Bowser	12	United States	Alaska	Soldotna, Ski Hill Road, Slikok watershed project site SK08, east half of plot	50 m2 sweep net sample	7/22/2016	2016-07-22	2016-07-22	media	60.45921	-151.08601	10977478	wild caught	Arthropoda	Corynoptera		Animalia	Corynoptera sp. BOLD:ADC2113	UAM-2019.02-Slikok_Creek_bioinventory-Ento	SK08
http://creativecommons.org/licenses/by/3.0/	UAMObs:Ento:239629	Dolichovespula arenaria	Hymenoptera	Vespidae	Insecta		(same lot as) KNWR:Ento http://arctos.database.museum/guid/KNWR:Ento:10964	Joel Stone, Matt Bowser	12	United States	Alaska	Soldotna, Ski Hill Road, Slikok watershed project site SK08, east half of plot	50 m2 sweep net sample	7/22/2016	2016-07-22	2016-07-22	media	60.45921	-151.08601	10977478	wild caught	Arthropoda	Dolichovespula		Animalia	Dolichovespula arenaria	UAM-2019.02-Slikok_Creek_bioinventory-Ento	SK08
http://creativecommons.org/licenses/by/3.0/	UAMObs:Ento:239631	Exechia sp. BOLD:ACO2323	Diptera	Mycetophilidae	Insecta		(same lot as) KNWR:Ento http://arctos.database.museum/guid/KNWR:Ento:10964	Joel Stone, Matt Bowser	12	United States	Alaska	Soldotna, Ski Hill Road, Slikok watershed project site SK08, east half of plot	50 m2 sweep net sample	7/22/2016	2016-07-22	2016-07-22	media	60.45921	-151.08601	10977478	wild caught	Arthropoda	Exechia		Animalia	Exechia sp. BOLD:ACO2323	UAM-2019.02-Slikok_Creek_bioinventory-Ento	SK08
http://creativecommons.org/licenses/by/3.0/	UAMObs:Ento:239644	Cinara pruinosa	Hemiptera	Lachnidae	Insecta		(same lot as) KNWR:Ento http://arctos.database.museum/guid/KNWR:Ento:10944	Matt Bowser, Todd Eskelin	12	United States	Alaska	Soldotna, forest 2.3km southeast of Headquarters Lake, Slikok watershed project site SK25, east half of plot	50 m2 sweep net sample	6/17/2016	2016-06-17	2016-06-17	media	60.44016	-151.03297	10970737	wild caught	Arthropoda	Cinara		Animalia	Cinara pruinosa	UAM-2019.02-Slikok_Creek_bioinventory-Ento	SK25
http://creativecommons.org/licenses/by/3.0/	UAMObs:Ento:239650	Cinara fornacula	Hemiptera	Lachnidae	Insecta		(same lot as) KNWR:Ento http://arctos.database.museum/guid/KNWR:Ento:10956	Mariah McInnis, Matt Bowser	12	United States	Alaska	Soldotna, forest 1.5km south of Headquarters Lake, Slikok watershed project site MG39, east half of plot	50 m2 sweep net sample	7/29/2016	2016-07-29	2016-07-29	media	60.44076	-151.06029	10977470	wild caught	Arthropoda	Cinara		Animalia	Cinara fornacula	UAM-2019.02-Slikok_Creek_bioinventory-Ento	MG39
http://creativecommons.org/licenses/by/3.0/	UAMObs:Ento:239656	Pauesia sp. SlikokOtu597	Hymenoptera	Braconidae	Insecta		(same lot as) KNWR:Ento http://arctos.database.museum/guid/KNWR:Ento:10956	Mariah McInnis, Matt Bowser	12	United States	Alaska	Soldotna, forest 1.5km south of Headquarters Lake, Slikok watershed project site MG39, east half of plot	50 m2 sweep net sample	7/29/2016	2016-07-29	2016-07-29	media	60.44076	-151.06029	10977470	wild caught	Arthropoda	Pauesia		Animalia		UAM-2019.02-Slikok_Creek_bioinventory-Ento	MG39
http://creativecommons.org/licenses/by/3.0/	UAMObs:Ento:239694	Mycetophilidae sp. SlikokOtu1126	Diptera	Mycetophilidae	Insecta		(same lot as) KNWR:Ento http://arctos.database.museum/guid/KNWR:Ento:10964	Joel Stone, Matt Bowser	12	United States	Alaska	Soldotna, Ski Hill Road, Slikok watershed project site SK08, east half of plot	50 m2 sweep net sample	7/22/2016	2016-07-22	2016-07-22	media	60.45921	-151.08601	10977478	wild caught	Arthropoda			Animalia		UAM-2019.02-Slikok_Creek_bioinventory-Ento	SK08
http://creativecommons.org/licenses/by/3.0/	UAMObs:Ento:239704	Phytosciara flavipes	Diptera	Sciaridae	Insecta		(same lot as) KNWR:Ento http://arctos.database.museum/guid/KNWR:Ento:10972	Mariah McInnis, Matt Bowser	12	United States	Alaska	Soldotna, forest 610m southweast of Nordic Lake, Slikok watershed project site SK22, east half of plot	50 m2 sweep net sample	8/9/2016	2016-08-09	2016-08-09	media	60.44135	-151.08761	10977486	wild caught	Arthropoda	Phytosciara		Animalia	Phytosciara flavipes	UAM-2019.02-Slikok_Creek_bioinventory-Ento	SK22
http://creativecommons.org/licenses/by/3.0/	UAMObs:Ento:239706	Plectiscus impurator	Hymenoptera	Ichneumonidae	Insecta		(same lot as) KNWR:Ento http://arctos.database.museum/guid/KNWR:Ento:10972	Mariah McInnis, Matt Bowser	12	United States	Alaska	Soldotna, forest 610m southweast of Nordic Lake, Slikok watershed project site SK22, east half of plot	50 m2 sweep net sample	8/9/2016	2016-08-09	2016-08-09	media	60.44135	-151.08761	10977486	wild caught	Arthropoda	Plectiscus		Animalia	Plectiscus impurator	UAM-2019.02-Slikok_Creek_bioinventory-Ento	SK22
http://creativecommons.org/licenses/by/3.0/	UAMObs:Ento:239707	Scatopsciara atomaria	Diptera	Sciaridae	Insecta		(same lot as) KNWR:Ento http://arctos.database.museum/guid/KNWR:Ento:10972	Mariah McInnis, Matt Bowser	12	United States	Alaska	Soldotna, forest 610m southweast of Nordic Lake, Slikok watershed project site SK22, east half of plot	50 m2 sweep net sample	8/9/2016	2016-08-09	2016-08-09	media	60.44135	-151.08761	10977486	wild caught	Arthropoda	Scatopsciara		Animalia	Scatopsciara atomaria	UAM-2019.02-Slikok_Creek_bioinventory-Ento	SK22
http://creativecommons.org/licenses/by/3.0/	UAMObs:Ento:239713	Simulium arcticum complex	Diptera	Simuliidae	Insecta		(same lot as) KNWR:Ento http://arctos.database.museum/guid/KNWR:Ento:10944	Matt Bowser, Todd Eskelin	12	United States	Alaska	Soldotna, forest 2.3km southeast of Headquarters Lake, Slikok watershed project site SK25, east half of plot	50 m2 sweep net sample	6/17/2016	2016-06-17	2016-06-17	media	60.44016	-151.03297	10970737	wild caught	Arthropoda	Simulium		Animalia		UAM-2019.02-Slikok_Creek_bioinventory-Ento	SK25
http://creativecommons.org/licenses/by/3.0/	UAMObs:Ento:239722	Mycomya sp. BOLD:AAG4937	Diptera	Mycetophilidae	Insecta		(same lot as) KNWR:Ento http://arctos.database.museum/guid/KNWR:Ento:10958	Mariah McInnis, Joel Stone, Matt Bowser	12	United States	Alaska	Soldotna, forest 2km southeast of Headquarters Lake, Slikok watershed project site MG41, east half of plot	50 m2 sweep net sample	7/21/2016	2016-07-21	2016-07-21	media	60.44036	-151.04208	10977472	wild caught	Arthropoda	Mycomya		Animalia	Mycomya sp. BOLD:AAG4937	UAM-2019.02-Slikok_Creek_bioinventory-Ento	MG41
http://creativecommons.org/licenses/by/3.0/	UAMObs:Ento:239728	Mycomya maculata	Diptera	Mycetophilidae	Insecta		(same lot as) KNWR:Ento http://arctos.database.museum/guid/KNWR:Ento:10964	Joel Stone, Matt Bowser	12	United States	Alaska	Soldotna, Ski Hill Road, Slikok watershed project site SK08, east half of plot	50 m2 sweep net sample	7/22/2016	2016-07-22	2016-07-22	media	60.45921	-151.08601	10977478	wild caught	Arthropoda	Mycomya		Animalia	Mycomya maculata	UAM-2019.02-Slikok_Creek_bioinventory-Ento	SK08
http://creativecommons.org/licenses/by/3.0/	UAMObs:Ento:239730	Platypalpus sp. BOLD:AAV3699	Diptera	Hybotidae	Insecta		(same lot as) KNWR:Ento http://arctos.database.museum/guid/KNWR:Ento:10964	Joel Stone, Matt Bowser	12	United States	Alaska	Soldotna, Ski Hill Road, Slikok watershed project site SK08, east half of plot	50 m2 sweep net sample	7/22/2016	2016-07-22	2016-07-22	media	60.45921	-151.08601	10977478	wild caught	Arthropoda	Platypalpus		Animalia	Platypalpus sp. BOLD:AAV3699	UAM-2019.02-Slikok_Creek_bioinventory-Ento	SK08
http://creativecommons.org/licenses/by/3.0/	UAMObs:Ento:239735	Trichonta sp. BOLD:AAL9147	Diptera	Mycetophilidae	Insecta		(same lot as) KNWR:Ento http://arctos.database.museum/guid/KNWR:Ento:10964	Joel Stone, Matt Bowser	12	United States	Alaska	Soldotna, Ski Hill Road, Slikok watershed project site SK08, east half of plot	50 m2 sweep net sample	7/22/2016	2016-07-22	2016-07-22	media	60.45921	-151.08601	10977478	wild caught	Arthropoda	Trichonta		Animalia	Trichonta sp. BOLD:AAL9147	UAM-2019.02-Slikok_Creek_bioinventory-Ento	SK08
http://creativecommons.org/licenses/by/3.0/	UAMObs:Ento:239780	Conchapelopia sp. BOLD:AAP8992	Diptera	Chironomidae	Insecta		(same lot as) KNWR:Ento http://arctos.database.museum/guid/KNWR:Ento:10948	Matt Bowser	12	United States	Alaska	Soldotna, Ski Hill Road, Centennial Trail north of Headquarters Lake, Slikok watershed project site MG02, east half of plot	50 m2 sweep net sample	7/19/2016	2016-07-19	2016-07-19	media	60.46755	-151.05787	10977462	wild caught	Arthropoda	Conchapelopia		Animalia	Conchapelopia sp. BOLD:AAP8992	UAM-2019.02-Slikok_Creek_bioinventory-Ento	MG02
http://creativecommons.org/licenses/by/3.0/	UAMObs:Ento:239806	Diptera sp. SlikokOtu2195	Diptera		Insecta		(same lot as) KNWR:Ento http://arctos.database.museum/guid/KNWR:Ento:10948	Matt Bowser	12	United States	Alaska	Soldotna, Ski Hill Road, Centennial Trail north of Headquarters Lake, Slikok watershed project site MG02, east half of plot	50 m2 sweep net sample	7/19/2016	2016-07-19	2016-07-19	media	60.46755	-151.05787	10977462	wild caught	Arthropoda			Animalia		UAM-2019.02-Slikok_Creek_bioinventory-Ento	MG02
http://creativecommons.org/licenses/by/3.0/	UAMObs:Ento:239819	Corynoptera sp. BOLD:ADC2113	Diptera	Sciaridae	Insecta		(same lot as) KNWR:Ento http://arctos.database.museum/guid/KNWR:Ento:10960	Matt Bowser	12	United States	Alaska	Soldotna, Ski Hill Road, off of Centennial Trail 480m northeast of Kenai National Wildlife Refuge headquarters building, Slikok watershed project site SK03, east half of plot	50 m2 sweep net sample	7/19/2016	2016-07-19	2016-07-19	media	60.46775	-151.06698	10977474	wild caught	Arthropoda	Corynoptera		Animalia	Corynoptera sp. BOLD:ADC2113	UAM-2019.02-Slikok_Creek_bioinventory-Ento	SK03
http://creativecommons.org/licenses/by/3.0/	UAMObs:Ento:239833	Macrocera stigma	Diptera	Keroplatidae	Insecta		(same lot as) KNWR:Ento http://arctos.database.museum/guid/KNWR:Ento:10948	Matt Bowser	12	United States	Alaska	Soldotna, Ski Hill Road, Centennial Trail north of Headquarters Lake, Slikok watershed project site MG02, east half of plot	50 m2 sweep net sample	7/19/2016	2016-07-19	2016-07-19	media	60.46755	-151.05787	10977462	wild caught	Arthropoda	Macrocera		Animalia	Macrocera stigma	UAM-2019.02-Slikok_Creek_bioinventory-Ento	MG02
http://creativecommons.org/licenses/by/3.0/	UAMObs:Ento:239839	Mycetophila perpallida	Diptera	Mycetophilidae	Insecta		(same lot as) KNWR:Ento http://arctos.database.museum/guid/KNWR:Ento:10948	Matt Bowser	12	United States	Alaska	Soldotna, Ski Hill Road, Centennial Trail north of Headquarters Lake, Slikok watershed project site MG02, east half of plot	50 m2 sweep net sample	7/19/2016	2016-07-19	2016-07-19	media	60.46755	-151.05787	10977462	wild caught	Arthropoda	Mycetophila		Animalia	Mycetophila perpallida	UAM-2019.02-Slikok_Creek_bioinventory-Ento	MG02
http://creativecommons.org/licenses/by/3.0/	UAMObs:Ento:239535	Aedes sp. SlikokOtu1817	Diptera	Culicidae	Insecta		(same lot as) KNWR:Ento http://arctos.database.museum/guid/KNWR:Ento:10928	Rebekah Brassfield, Todd Eskelin	12	United States	Alaska	Soldotna, shore of southeastern bay of Headquarters Lake, Slikok watershed project site MG19, east half of plot	50 m2 sweep net sample	6/16/2016	2016-06-16	2016-06-16	media	60.45435	-151.06819	10970721	wild caught	Arthropoda	Aedes		Animalia		UAM-2019.02-Slikok_Creek_bioinventory-Ento	MG19
http://creativecommons.org/licenses/by/3.0/	UAMObs:Ento:239539	Clinohelea sp. BOLD:AAG6451	Diptera	Ceratopogonidae	Insecta		(same lot as) KNWR:Ento http://arctos.database.museum/guid/KNWR:Ento:10928	Rebekah Brassfield, Todd Eskelin	12	United States	Alaska	Soldotna, shore of southeastern bay of Headquarters Lake, Slikok watershed project site MG19, east half of plot	50 m2 sweep net sample	6/16/2016	2016-06-16	2016-06-16	media	60.45435	-151.06819	10970721	wild caught	Arthropoda	Clinohelea		Animalia	Clinohelea sp. BOLD:AAG6451	UAM-2019.02-Slikok_Creek_bioinventory-Ento	MG19
http://creativecommons.org/licenses/by/3.0/	UAMObs:Ento:239543	Muscidae sp. cf. DRYAS21764-15	Diptera	Muscidae	Insecta		(same lot as) KNWR:Ento http://arctos.database.museum/guid/KNWR:Ento:10928	Rebekah Brassfield, Todd Eskelin	12	United States	Alaska	Soldotna, shore of southeastern bay of Headquarters Lake, Slikok watershed project site MG19, east half of plot	50 m2 sweep net sample	6/16/2016	2016-06-16	2016-06-16	media	60.45435	-151.06819	10970721	wild caught	Arthropoda			Animalia		UAM-2019.02-Slikok_Creek_bioinventory-Ento	MG19
http://creativecommons.org/licenses/by/3.0/	UAMObs:Ento:239545	Muscidae sp. SlikokOtu843	Diptera	Muscidae	Insecta		(same lot as) KNWR:Ento http://arctos.database.museum/guid/KNWR:Ento:10928	Rebekah Brassfield, Todd Eskelin	12	United States	Alaska	Soldotna, shore of southeastern bay of Headquarters Lake, Slikok watershed project site MG19, east half of plot	50 m2 sweep net sample	6/16/2016	2016-06-16	2016-06-16	media	60.45435	-151.06819	10970721	wild caught	Arthropoda			Animalia		UAM-2019.02-Slikok_Creek_bioinventory-Ento	MG19
http://creativecommons.org/licenses/by/3.0/	UAMObs:Ento:239547	Orthocladiinae sp. BOLD:AAN5397	Diptera	Chironomidae	Insecta		(same lot as) KNWR:Ento http://arctos.database.museum/guid/KNWR:Ento:10928	Rebekah Brassfield, Todd Eskelin	12	United States	Alaska	Soldotna, shore of southeastern bay of Headquarters Lake, Slikok watershed project site MG19, east half of plot	50 m2 sweep net sample	6/16/2016	2016-06-16	2016-06-16	media	60.45435	-151.06819	10970721	wild caught	Arthropoda			Animalia	Orthocladiinae sp. BOLD:AAN5397	UAM-2019.02-Slikok_Creek_bioinventory-Ento	MG19
http://creativecommons.org/licenses/by/3.0/	UAMObs:Ento:239562	Limnophyes minimus	Diptera	Chironomidae	Insecta		(same lot as) KNWR:Ento http://arctos.database.museum/guid/KNWR:Ento:10936	Rebekah Brassfield, Todd Eskelin	12	United States	Alaska	Soldotna, forest 120m east of Nordic Lake, Slikok watershed project site MG24, east half of plot	50 m2 sweep net sample	6/16/2016	2016-06-16	2016-06-16	media	60.45008	-151.0777	10970729	wild caught	Arthropoda	Limnophyes		Animalia	Limnophyes minimus	UAM-2019.02-Slikok_Creek_bioinventory-Ento	MG24
http://creativecommons.org/licenses/by/3.0/	UAMObs:Ento:238909	Sarcoptiformes sp. SlikokOtu1224	Sarcoptiformes		Arachnida		(same lot as) KNWR:Ento http://arctos.database.museum/guid/KNWR:Ento:10881	Matt Bowser, Todd Eskelin	12	United States	Alaska	Soldotna, forest 1.5km south of Headquarters Lake, Slikok watershed project site MG39, east half of plot	50 m2 sweep net sample	6/15/2016	2016-06-15	2016-06-15	media	60.44076	-151.06029	10970674	wild caught	Arthropoda			Animalia		UAM-2019.02-Slikok_Creek_bioinventory-Ento	MG39
http://creativecommons.org/licenses/by/3.0/	UAMObs:Ento:238919	Cyclosa conica	Araneae	Araneidae	Arachnida		(same lot as) KNWR:Ento http://arctos.database.museum/guid/KNWR:Ento:10883	Matt Bowser, Todd Eskelin	12	United States	Alaska	Soldotna, forest 2km southeast of Headquarters Lake, Slikok watershed project site MG41, east half of plot	50 m2 sweep net sample	6/17/2016	2016-06-17	2016-06-17	media	60.44036	-151.04208	10970676	wild caught	Arthropoda	Cyclosa		Animalia	Cyclosa conica	UAM-2019.02-Slikok_Creek_bioinventory-Ento	MG41
http://creativecommons.org/licenses/by/3.0/	UAMObs:Ento:238921	Hybotidae sp. BOLD:ACX4896	Diptera	Hybotidae	Insecta		(same lot as) KNWR:Ento http://arctos.database.museum/guid/KNWR:Ento:10883	Matt Bowser, Todd Eskelin	12	United States	Alaska	Soldotna, forest 2km southeast of Headquarters Lake, Slikok watershed project site MG41, east half of plot	50 m2 sweep net sample	6/17/2016	2016-06-17	2016-06-17	media	60.44036	-151.04208	10970676	wild caught	Arthropoda			Animalia	Hybotidae sp. BOLD:ACX4896	UAM-2019.02-Slikok_Creek_bioinventory-Ento	MG41
http://creativecommons.org/licenses/by/3.0/	UAMObs:Ento:238926	Pherbellia albocostata	Diptera	Sciomyzidae	Insecta		(same lot as) KNWR:Ento http://arctos.database.museum/guid/KNWR:Ento:10883	Matt Bowser, Todd Eskelin	12	United States	Alaska	Soldotna, forest 2km southeast of Headquarters Lake, Slikok watershed project site MG41, east half of plot	50 m2 sweep net sample	6/17/2016	2016-06-17	2016-06-17	media	60.44036	-151.04208	10970676	wild caught	Arthropoda	Pherbellia		Animalia	Pherbellia albocostata	UAM-2019.02-Slikok_Creek_bioinventory-Ento	MG41
http://creativecommons.org/licenses/by/3.0/	UAMObs:Ento:238927	Pikonema alaskense	Hymenoptera	Tenthredinidae	Insecta		(same lot as) KNWR:Ento http://arctos.database.museum/guid/KNWR:Ento:10883	Matt Bowser, Todd Eskelin	12	United States	Alaska	Soldotna, forest 2km southeast of Headquarters Lake, Slikok watershed project site MG41, east half of plot	50 m2 sweep net sample	6/17/2016	2016-06-17	2016-06-17	media	60.44036	-151.04208	10970676	wild caught	Arthropoda	Pikonema		Animalia	Pikonema alaskense	UAM-2019.02-Slikok_Creek_bioinventory-Ento	MG41
http://creativecommons.org/licenses/by/3.0/	UAMObs:Ento:239082	Cylindrotoma distinctissima	Diptera	Tipulidae	Insecta		(same lot as) KNWR:Ento http://arctos.database.museum/guid/KNWR:Ento:10901	Rebekah Brassfield, Todd Eskelin	12	United States	Alaska	Soldotna, Ski Hill Road, Slikok watershed project site SK08, east half of plot	50 m2 sweep net sample	6/14/2016	2016-06-14	2016-06-14	media	60.45921	-151.08601	10970694	wild caught	Arthropoda	Cylindrotoma		Animalia	Cylindrotoma distinctissima	UAM-2019.02-Slikok_Creek_bioinventory-Ento	SK08
http://creativecommons.org/licenses/by/3.0/	UAMObs:Ento:239083	Exechia contaminata	Diptera	Mycetophilidae	Insecta		(same lot as) KNWR:Ento http://arctos.database.museum/guid/KNWR:Ento:10901	Rebekah Brassfield, Todd Eskelin	12	United States	Alaska	Soldotna, Ski Hill Road, Slikok watershed project site SK08, east half of plot	50 m2 sweep net sample	6/14/2016	2016-06-14	2016-06-14	media	60.45921	-151.08601	10970694	wild caught	Arthropoda	Exechia		Animalia	Exechia contaminata	UAM-2019.02-Slikok_Creek_bioinventory-Ento	SK08
http://creativecommons.org/licenses/by/3.0/	UAMObs:Ento:239085	Lygocoris pabulinus	Hemiptera	Miridae	Insecta		(same lot as) KNWR:Ento http://arctos.database.museum/guid/KNWR:Ento:10901	Rebekah Brassfield, Todd Eskelin	12	United States	Alaska	Soldotna, Ski Hill Road, Slikok watershed project site SK08, east half of plot	50 m2 sweep net sample	6/14/2016	2016-06-14	2016-06-14	media	60.45921	-151.08601	10970694	wild caught	Arthropoda	Lygocoris		Animalia	Lygocoris pabulinus	UAM-2019.02-Slikok_Creek_bioinventory-Ento	SK08
http://creativecommons.org/licenses/by/3.0/	UAMObs:Ento:239130	Ochlerotatus communis	Diptera	Culicidae	Insecta		(same lot as) KNWR:Ento http://arctos.database.museum/guid/KNWR:Ento:10904	Rebekah Brassfield, Todd Eskelin	12	United States	Alaska	Soldotna, 100m west of Sterling Highway and 1.3km from intersection with Funny River Road, Slikok watershed project site MG04, east half of plot	50 m2 sweep net sample	6/14/2016	2016-06-14	2016-06-14	media	60.46387	-151.09473	10970697	wild caught	Arthropoda	Ochlerotatus		Animalia	Ochlerotatus communis	UAM-2019.02-Slikok_Creek_bioinventory-Ento	MG04
http://creativecommons.org/licenses/by/3.0/	UAMObs:Ento:239157	Ochlerotatus communis	Diptera	Culicidae	Insecta		(same lot as) KNWR:Ento http://arctos.database.museum/guid/KNWR:Ento:10899	Matt Bowser, Dawn Magness	12	United States	Alaska	Soldotna, Ski Hill Road, forest 840m northeast of Headquarters Lake, Slikok watershed project site SK04, east half of plot	50 m2 sweep net sample	6/14/2016	2016-06-14	2016-06-14	media	60.46735	-151.04875	10970692	wild caught	Arthropoda	Ochlerotatus		Animalia	Ochlerotatus communis	UAM-2019.02-Slikok_Creek_bioinventory-Ento	SK04
http://creativecommons.org/licenses/by/3.0/	UAMObs:Ento:239204	Araneus trifolium	Araneae	Araneidae	Arachnida		(same lot as) KNWR:Ento http://arctos.database.museum/guid/KNWR:Ento:10910	Matt Bowser, Dawn Magness	12	United States	Alaska	Soldotna, woods on north shore of Headquarters Lake 200m east of Keen Eye Trail floating dock, Slikok watershed project site MG07, east half of plot	50 m2 sweep net sample	6/14/2016	2016-06-14	2016-06-14	media	60.46328	-151.06739	10970703	wild caught	Arthropoda	Araneus		Animalia	Araneus trifolium	UAM-2019.02-Slikok_Creek_bioinventory-Ento	MG07
http://creativecommons.org/licenses/by/3.0/	UAMObs:Ento:239210	Dilophus femoratus	Diptera	Bibionidae	Insecta		(same lot as) KNWR:Ento http://arctos.database.museum/guid/KNWR:Ento:10910	Matt Bowser, Dawn Magness	12	United States	Alaska	Soldotna, woods on north shore of Headquarters Lake 200m east of Keen Eye Trail floating dock, Slikok watershed project site MG07, east half of plot	50 m2 sweep net sample	6/14/2016	2016-06-14	2016-06-14	media	60.46328	-151.06739	10970703	wild caught	Arthropoda	Dilophus		Animalia	Dilophus femoratus	UAM-2019.02-Slikok_Creek_bioinventory-Ento	MG07
http://creativecommons.org/licenses/by/3.0/	UAMObs:Ento:239223	Ceraticelus fissiceps	Araneae	Linyphiidae	Arachnida		(same lot as) KNWR:Ento http://arctos.database.museum/guid/KNWR:Ento:10912	Matt Bowser, Dawn Magness	12	United States	Alaska	Soldotna, muskeg 120m northeast of Headquarters Lake, Slikok watershed project site MG08, east half of plot	50 m2 sweep net sample	6/14/2016	2016-06-14	2016-06-14	media	60.46309	-151.05827	10970705	wild caught	Arthropoda	Ceraticelus		Animalia	Ceraticelus fissiceps	UAM-2019.02-Slikok_Creek_bioinventory-Ento	MG08
http://creativecommons.org/licenses/by/3.0/	UAMObs:Ento:239224	Conchapelopia americana	Diptera	Chironomidae	Insecta		(same lot as) KNWR:Ento http://arctos.database.museum/guid/KNWR:Ento:10912	Matt Bowser, Dawn Magness	12	United States	Alaska	Soldotna, muskeg 120m northeast of Headquarters Lake, Slikok watershed project site MG08, east half of plot	50 m2 sweep net sample	6/14/2016	2016-06-14	2016-06-14	media	60.46309	-151.05827	10970705	wild caught	Arthropoda	Conchapelopia		Animalia	Conchapelopia americana	UAM-2019.02-Slikok_Creek_bioinventory-Ento	MG08
http://creativecommons.org/licenses/by/3.0/	UAMObs:Ento:239230	Macrosteles cristata	Hemiptera	Cicadellidae	Insecta		(same lot as) KNWR:Ento http://arctos.database.museum/guid/KNWR:Ento:10912	Matt Bowser, Dawn Magness	12	United States	Alaska	Soldotna, muskeg 120m northeast of Headquarters Lake, Slikok watershed project site MG08, east half of plot	50 m2 sweep net sample	6/14/2016	2016-06-14	2016-06-14	media	60.46309	-151.05827	10970705	wild caught	Arthropoda	Macrosteles		Animalia	Macrosteles cristata	UAM-2019.02-Slikok_Creek_bioinventory-Ento	MG08
http://creativecommons.org/licenses/by/3.0/	UAMObs:Ento:239237	Tetragnatha extensa	Araneae	Tetragnathidae	Arachnida		(same lot as) KNWR:Ento http://arctos.database.museum/guid/KNWR:Ento:10912	Matt Bowser, Dawn Magness	12	United States	Alaska	Soldotna, muskeg 120m northeast of Headquarters Lake, Slikok watershed project site MG08, east half of plot	50 m2 sweep net sample	6/14/2016	2016-06-14	2016-06-14	media	60.46309	-151.05827	10970705	wild caught	Arthropoda	Tetragnatha		Animalia	Tetragnatha extensa	UAM-2019.02-Slikok_Creek_bioinventory-Ento	MG08
http://creativecommons.org/licenses/by/3.0/	UAMObs:Ento:239241	Pityohyphantes limitaneus	Araneae	Linyphiidae	Arachnida		(same lot as) KNWR:Ento http://arctos.database.museum/guid/KNWR:Ento:10912	Matt Bowser, Dawn Magness	12	United States	Alaska	Soldotna, muskeg 120m northeast of Headquarters Lake, Slikok watershed project site MG08, east half of plot	50 m2 sweep net sample	6/14/2016	2016-06-14	2016-06-14	media	60.46309	-151.05827	10970705	wild caught	Arthropoda	Pityohyphantes		Animalia	Pityohyphantes limitaneus	UAM-2019.02-Slikok_Creek_bioinventory-Ento	MG08
http://creativecommons.org/licenses/by/3.0/	UAMObs:Ento:239261	Craspedolepta schwarzi	Hemiptera	Psyllidae	Insecta		(same lot as) KNWR:Ento http://arctos.database.museum/guid/KNWR:Ento:10904	Rebekah Brassfield, Todd Eskelin	12	United States	Alaska	Soldotna, 100m west of Sterling Highway and 1.3km from intersection with Funny River Road, Slikok watershed project site MG04, east half of plot	50 m2 sweep net sample	6/14/2016	2016-06-14	2016-06-14	media	60.46387	-151.09473	10970697	wild caught	Arthropoda	Craspedolepta		Animalia	Craspedolepta schwarzi	UAM-2019.02-Slikok_Creek_bioinventory-Ento	MG04
http://creativecommons.org/licenses/by/3.0/	UAMObs:Ento:239266	Thamnotettix confinis	Hemiptera	Cicadellidae	Insecta		(same lot as) KNWR:Ento http://arctos.database.museum/guid/KNWR:Ento:10904	Rebekah Brassfield, Todd Eskelin	12	United States	Alaska	Soldotna, 100m west of Sterling Highway and 1.3km from intersection with Funny River Road, Slikok watershed project site MG04, east half of plot	50 m2 sweep net sample	6/14/2016	2016-06-14	2016-06-14	media	60.46387	-151.09473	10970697	wild caught	Arthropoda	Thamnotettix		Animalia	Thamnotettix confinis	UAM-2019.02-Slikok_Creek_bioinventory-Ento	MG04
http://creativecommons.org/licenses/by/3.0/	UAMObs:Ento:239298	Fannia sp. SlikokOtu735	Diptera	Fanniidae	Insecta		(same lot as) KNWR:Ento http://arctos.database.museum/guid/KNWR:Ento:10908	Joel Stone, Dawn Magness	12	United States	Alaska	Soldotna, Ski Hill Road, ski trails between new visitor center and old septic leach field, Slikok watershed project site MG06, east half of plot	50 m2 sweep net sample	6/17/2016	2016-06-17	2016-06-17	media	60.46348	-151.0765	10970701	wild caught	Arthropoda	Fannia		Animalia		UAM-2019.02-Slikok_Creek_bioinventory-Ento	MG06
http://creativecommons.org/licenses/by/3.0/	UAMObs:Ento:239307	Rhamphomyia barypoda	Diptera	Empididae	Insecta		(same lot as) KNWR:Ento http://arctos.database.museum/guid/KNWR:Ento:10908	Joel Stone, Dawn Magness	12	United States	Alaska	Soldotna, Ski Hill Road, ski trails between new visitor center and old septic leach field, Slikok watershed project site MG06, east half of plot	50 m2 sweep net sample	6/17/2016	2016-06-17	2016-06-17	media	60.46348	-151.0765	10970701	wild caught	Arthropoda	Rhamphomyia		Animalia	Rhamphomyia barypoda	UAM-2019.02-Slikok_Creek_bioinventory-Ento	MG06
http://creativecommons.org/licenses/by/3.0/	UAMObs:Ento:239328	Pityohyphantes alticeps	Araneae	Linyphiidae	Arachnida		(same lot as) KNWR:Ento http://arctos.database.museum/guid/KNWR:Ento:10920	Rebekah Brassfield, Dawn Magness	12	United States	Alaska	Soldotna, muskeg 40m east of Headquarters Lake, Slikok watershed project site MG14, east half of plot	50 m2 sweep net sample	6/15/2016	2016-06-15	2016-06-15	media	60.45862	-151.05868	10970713	wild caught	Arthropoda	Pityohyphantes		Animalia	Pityohyphantes alticeps	UAM-2019.02-Slikok_Creek_bioinventory-Ento	MG14
http://creativecommons.org/licenses/by/3.0/	UAMObs:Ento:239355	Xestia speciosa	Lepidoptera	Noctuidae	Insecta		(same lot as) KNWR:Ento http://arctos.database.museum/guid/KNWR:Ento:10922	Joel Stone, Dawn Magness	12	United States	Alaska	Soldotna, 210m east-southeast of intersection of Sterling Highway and south end of Ski Hill Road, Slikok watershed project site MG16, east half of plot	50 m2 sweep net sample	6/17/2016	2016-06-17	2016-06-17	media	60.45494	-151.09552	10970715	wild caught	Arthropoda	Xestia		Animalia	Xestia speciosa	UAM-2019.02-Slikok_Creek_bioinventory-Ento	MG16
http://creativecommons.org/licenses/by/3.0/	UAMObs:Ento:239381	Cicadula sp. BOLD:ACI5705	Hemiptera	Cicadellidae	Insecta		(same lot as) KNWR:Ento http://arctos.database.museum/guid/KNWR:Ento:10914	Matt Bowser, Dawn Magness	12	United States	Alaska	Soldotna, muskeg 0.6km northeast of Headquarters Lake, Slikok watershed project site MG09, east half of plot	50 m2 sweep net sample	6/14/2016	2016-06-14	2016-06-14	media	60.46289	-151.04916	10970707	wild caught	Arthropoda	Cicadula		Animalia	Cicadula sp. BOLD:ACI5705	UAM-2019.02-Slikok_Creek_bioinventory-Ento	MG09
http://creativecommons.org/licenses/by/3.0/	UAMObs:Ento:239384	Limnephilus sp. BOLD:ADI0058	Trichoptera	Limnephilidae	Insecta		(same lot as) KNWR:Ento http://arctos.database.museum/guid/KNWR:Ento:10914	Matt Bowser, Dawn Magness	12	United States	Alaska	Soldotna, muskeg 0.6km northeast of Headquarters Lake, Slikok watershed project site MG09, east half of plot	50 m2 sweep net sample	6/14/2016	2016-06-14	2016-06-14	media	60.46289	-151.04916	10970707	wild caught	Arthropoda	Limnephilus		Animalia	Limnephilus sp. BOLD:ADI0058	UAM-2019.02-Slikok_Creek_bioinventory-Ento	MG09
http://creativecommons.org/licenses/by/3.0/	UAMObs:Ento:239387	Lithophane thaxteri	Lepidoptera	Noctuidae	Insecta		(same lot as) KNWR:Ento http://arctos.database.museum/guid/KNWR:Ento:10914	Matt Bowser, Dawn Magness	12	United States	Alaska	Soldotna, muskeg 0.6km northeast of Headquarters Lake, Slikok watershed project site MG09, east half of plot	50 m2 sweep net sample	6/14/2016	2016-06-14	2016-06-14	media	60.46289	-151.04916	10970707	wild caught	Arthropoda	Lithophane		Animalia	Lithophane thaxteri	UAM-2019.02-Slikok_Creek_bioinventory-Ento	MG09
http://creativecommons.org/licenses/by/3.0/	UAMObs:Ento:239390	Natarsia punctata	Diptera	Chironomidae	Insecta		(same lot as) KNWR:Ento http://arctos.database.museum/guid/KNWR:Ento:10914	Matt Bowser, Dawn Magness	12	United States	Alaska	Soldotna, muskeg 0.6km northeast of Headquarters Lake, Slikok watershed project site MG09, east half of plot	50 m2 sweep net sample	6/14/2016	2016-06-14	2016-06-14	media	60.46289	-151.04916	10970707	wild caught	Arthropoda	Natarsia		Animalia	Natarsia punctata	UAM-2019.02-Slikok_Creek_bioinventory-Ento	MG09
http://creativecommons.org/licenses/by/3.0/	UAMObs:Ento:239400	Ohlertidion ohlerti	Araneae	Theridiidae	Arachnida		(same lot as) KNWR:Ento http://arctos.database.museum/guid/KNWR:Ento:10914	Matt Bowser, Dawn Magness	12	United States	Alaska	Soldotna, muskeg 0.6km northeast of Headquarters Lake, Slikok watershed project site MG09, east half of plot	50 m2 sweep net sample	6/14/2016	2016-06-14	2016-06-14	media	60.46289	-151.04916	10970707	wild caught	Arthropoda	Ohlertidion		Animalia	Ohlertidion ohlerti	UAM-2019.02-Slikok_Creek_bioinventory-Ento	MG09
http://creativecommons.org/licenses/by/3.0/	UAMObs:Ento:239413	Ceraticelus fissiceps	Araneae	Linyphiidae	Arachnida		(same lot as) KNWR:Ento http://arctos.database.museum/guid/KNWR:Ento:10916	Rebekah Brassfield, Todd Eskelin	12	United States	Alaska	Soldotna, 40m east of Sterling Highway 480m northeast of intersection with south end of Ski Hill Road, Slikok watershed project site MG10, east half of plot	50 m2 sweep net sample	6/14/2016	2016-06-14	2016-06-14	media	60.45941	-151.09513	10970709	wild caught	Arthropoda	Ceraticelus		Animalia	Ceraticelus fissiceps	UAM-2019.02-Slikok_Creek_bioinventory-Ento	MG10
http://creativecommons.org/licenses/by/3.0/	UAMObs:Ento:239417	Dichelotarsus fissilis	Coleoptera	Cantharidae	Insecta		(same lot as) KNWR:Ento http://arctos.database.museum/guid/KNWR:Ento:10916	Rebekah Brassfield, Todd Eskelin	12	United States	Alaska	Soldotna, 40m east of Sterling Highway 480m northeast of intersection with south end of Ski Hill Road, Slikok watershed project site MG10, east half of plot	50 m2 sweep net sample	6/14/2016	2016-06-14	2016-06-14	media	60.45941	-151.09513	10970709	wild caught	Arthropoda	Dichelotarsus		Animalia	Dichelotarsus fissilis	UAM-2019.02-Slikok_Creek_bioinventory-Ento	MG10
http://creativecommons.org/licenses/by/3.0/	UAMObs:Ento:239419	Dikraneura sp. BOLD:AAV0227	Hemiptera	Cicadellidae	Insecta		(same lot as) KNWR:Ento http://arctos.database.museum/guid/KNWR:Ento:10916	Rebekah Brassfield, Todd Eskelin	12	United States	Alaska	Soldotna, 40m east of Sterling Highway 480m northeast of intersection with south end of Ski Hill Road, Slikok watershed project site MG10, east half of plot	50 m2 sweep net sample	6/14/2016	2016-06-14	2016-06-14	media	60.45941	-151.09513	10970709	wild caught	Arthropoda	Dikraneura		Animalia	Dikraneura sp. BOLD:AAV0227	UAM-2019.02-Slikok_Creek_bioinventory-Ento	MG10
http://creativecommons.org/licenses/by/3.0/	UAMObs:Ento:239427	Leptalia macilenta	Coleoptera	Cerambycidae	Insecta		(same lot as) KNWR:Ento http://arctos.database.museum/guid/KNWR:Ento:10916	Rebekah Brassfield, Todd Eskelin	12	United States	Alaska	Soldotna, 40m east of Sterling Highway 480m northeast of intersection with south end of Ski Hill Road, Slikok watershed project site MG10, east half of plot	50 m2 sweep net sample	6/14/2016	2016-06-14	2016-06-14	media	60.45941	-151.09513	10970709	wild caught	Arthropoda	Leptalia		Animalia	Leptalia macilenta	UAM-2019.02-Slikok_Creek_bioinventory-Ento	MG10
http://creativecommons.org/licenses/by/3.0/	UAMObs:Ento:239432	Psilidae sp. BOLD:AAF9705	Diptera	Psilidae	Insecta		(same lot as) KNWR:Ento http://arctos.database.museum/guid/KNWR:Ento:10916	Rebekah Brassfield, Todd Eskelin	12	United States	Alaska	Soldotna, 40m east of Sterling Highway 480m northeast of intersection with south end of Ski Hill Road, Slikok watershed project site MG10, east half of plot	50 m2 sweep net sample	6/14/2016	2016-06-14	2016-06-14	media	60.45941	-151.09513	10970709	wild caught	Arthropoda			Animalia	Psilidae sp. BOLD:AAF9705	UAM-2019.02-Slikok_Creek_bioinventory-Ento	MG10
http://creativecommons.org/licenses/by/3.0/	UAMObs:Ento:239439	Tanytarsus sp. BOLD:ABW2740	Diptera	Chironomidae	Insecta		(same lot as) KNWR:Ento http://arctos.database.museum/guid/KNWR:Ento:10916	Rebekah Brassfield, Todd Eskelin	12	United States	Alaska	Soldotna, 40m east of Sterling Highway 480m northeast of intersection with south end of Ski Hill Road, Slikok watershed project site MG10, east half of plot	50 m2 sweep net sample	6/14/2016	2016-06-14	2016-06-14	media	60.45941	-151.09513	10970709	wild caught	Arthropoda	Tanytarsus		Animalia	Tanytarsus sp. BOLD:ABW2740	UAM-2019.02-Slikok_Creek_bioinventory-Ento	MG10
http://creativecommons.org/licenses/by/3.0/	UAMObs:Ento:239444	Fannia spathiophora	Diptera	Fanniidae	Insecta		(same lot as) KNWR:Ento http://arctos.database.museum/guid/KNWR:Ento:10930	Rebekah Brassfield, Dawn Magness	12	United States	Alaska	Soldotna, muskeg 230m southeast of Headquarters Lake, Slikok watershed project site MG20, east half of plot	50 m2 sweep net sample	6/15/2016	2016-06-15	2016-06-15	media	60.45415	-151.05908	10970723	wild caught	Arthropoda	Fannia		Animalia	Fannia spathiophora	UAM-2019.02-Slikok_Creek_bioinventory-Ento	MG20
http://creativecommons.org/licenses/by/3.0/	UAMObs:Ento:239454	Ochlerotatus communis	Diptera	Culicidae	Insecta		(same lot as) KNWR:Ento http://arctos.database.museum/guid/KNWR:Ento:10932	Rebekah Brassfield, Dawn Magness	12	United States	Alaska	Soldotna, forest 720km southeast of Headquarters Lake, Slikok watershed project site MG21, east half of plot	50 m2 sweep net sample	6/15/2016	2016-06-15	2016-06-15	media	60.45396	-151.04997	10970725	wild caught	Arthropoda	Ochlerotatus		Animalia	Ochlerotatus communis	UAM-2019.02-Slikok_Creek_bioinventory-Ento	MG21
http://creativecommons.org/licenses/by/3.0/	UAMObs:Ento:239461	Illinoia menziesiae	Hemiptera	Aphididae	Insecta		(same lot as) KNWR:Ento http://arctos.database.museum/guid/KNWR:Ento:10932	Rebekah Brassfield, Dawn Magness	12	United States	Alaska	Soldotna, forest 720km southeast of Headquarters Lake, Slikok watershed project site MG21, east half of plot	50 m2 sweep net sample	6/15/2016	2016-06-15	2016-06-15	media	60.45396	-151.04997	10970725	wild caught	Arthropoda	Illinoia		Animalia	Illinoia menziesiae	UAM-2019.02-Slikok_Creek_bioinventory-Ento	MG21
http://creativecommons.org/licenses/by/3.0/	UAMObs:Ento:239467	Sminthuridae sp. SlikokOtu1231	Symphypleona	Sminthuridae	Collembola		(same lot as) KNWR:Ento http://arctos.database.museum/guid/KNWR:Ento:10932	Rebekah Brassfield, Dawn Magness	12	United States	Alaska	Soldotna, forest 720km southeast of Headquarters Lake, Slikok watershed project site MG21, east half of plot	50 m2 sweep net sample	6/15/2016	2016-06-15	2016-06-15	media	60.45396	-151.04997	10970725	wild caught	Arthropoda			Animalia		UAM-2019.02-Slikok_Creek_bioinventory-Ento	MG21
http://creativecommons.org/licenses/by/3.0/	UAMObs:Ento:239482	Aedes abserratus	Diptera	Culicidae	Insecta		(same lot as) KNWR:Ento http://arctos.database.museum/guid/KNWR:Ento:10936	Rebekah Brassfield, Todd Eskelin	12	United States	Alaska	Soldotna, forest 120m east of Nordic Lake, Slikok watershed project site MG24, east half of plot	50 m2 sweep net sample	6/16/2016	2016-06-16	2016-06-16	media	60.45008	-151.0777	10970729	wild caught	Arthropoda	Aedes		Animalia	Aedes abserratus	UAM-2019.02-Slikok_Creek_bioinventory-Ento	MG24
http://creativecommons.org/licenses/by/3.0/	UAMObs:Ento:239485	Ochlerotatus punctor	Diptera	Culicidae	Insecta		(same lot as) KNWR:Ento http://arctos.database.museum/guid/KNWR:Ento:10936	Rebekah Brassfield, Todd Eskelin	12	United States	Alaska	Soldotna, forest 120m east of Nordic Lake, Slikok watershed project site MG24, east half of plot	50 m2 sweep net sample	6/16/2016	2016-06-16	2016-06-16	media	60.45008	-151.0777	10970729	wild caught	Arthropoda	Ochlerotatus		Animalia	Ochlerotatus punctor	UAM-2019.02-Slikok_Creek_bioinventory-Ento	MG24
http://creativecommons.org/licenses/by/3.0/	UAMObs:Ento:239511	Diptera sp. SlikokOtu1738	Diptera		Insecta		(same lot as) KNWR:Ento http://arctos.database.museum/guid/KNWR:Ento:10924	Rebekah Brassfield, Todd Eskelin	12	United States	Alaska	Soldotna, Ski Hill Road, off of Howling Hill Trail, Slikok watershed project site MG17, east half of plot	50 m2 sweep net sample	6/14/2016	2016-06-14	2016-06-14	media	60.45475	-151.08641	10970717	wild caught	Arthropoda			Animalia		UAM-2019.02-Slikok_Creek_bioinventory-Ento	MG17
http://creativecommons.org/licenses/by/3.0/	UAMObs:Ento:239512	Diptera sp. SlikokOtu1909	Diptera		Insecta		(same lot as) KNWR:Ento http://arctos.database.museum/guid/KNWR:Ento:10924	Rebekah Brassfield, Todd Eskelin	12	United States	Alaska	Soldotna, Ski Hill Road, off of Howling Hill Trail, Slikok watershed project site MG17, east half of plot	50 m2 sweep net sample	6/14/2016	2016-06-14	2016-06-14	media	60.45475	-151.08641	10970717	wild caught	Arthropoda			Animalia		UAM-2019.02-Slikok_Creek_bioinventory-Ento	MG17
http://creativecommons.org/licenses/by/3.0/	UAMObs:Ento:239517	Muscidae sp. SlikokOtu2163	Diptera	Muscidae	Insecta		(same lot as) KNWR:Ento http://arctos.database.museum/guid/KNWR:Ento:10924	Rebekah Brassfield, Todd Eskelin	12	United States	Alaska	Soldotna, Ski Hill Road, off of Howling Hill Trail, Slikok watershed project site MG17, east half of plot	50 m2 sweep net sample	6/14/2016	2016-06-14	2016-06-14	media	60.45475	-151.08641	10970717	wild caught	Arthropoda			Animalia		UAM-2019.02-Slikok_Creek_bioinventory-Ento	MG17
http://creativecommons.org/licenses/by/3.0/	UAMObs:Ento:239521	Fannia aethiops	Diptera	Fanniidae	Insecta		(same lot as) KNWR:Ento http://arctos.database.museum/guid/KNWR:Ento:10924	Rebekah Brassfield, Todd Eskelin	12	United States	Alaska	Soldotna, Ski Hill Road, off of Howling Hill Trail, Slikok watershed project site MG17, east half of plot	50 m2 sweep net sample	6/14/2016	2016-06-14	2016-06-14	media	60.45475	-151.08641	10970717	wild caught	Arthropoda	Fannia		Animalia	Fannia aethiops	UAM-2019.02-Slikok_Creek_bioinventory-Ento	MG17
http://creativecommons.org/licenses/by/3.0/	UAMObs:Ento:239524	Aedes abserratus	Diptera	Culicidae	Insecta		(same lot as) KNWR:Ento http://arctos.database.museum/guid/KNWR:Ento:10926	Rebekah Brassfield, Todd Eskelin	12	United States	Alaska	Soldotna, in wetland 510m southwest of Headquarters Lake, Slikok watershed project site MG18, east half of plot	50 m2 sweep net sample	6/16/2016	2016-06-16	2016-06-16	media	60.45455	-151.0773	10970719	wild caught	Arthropoda	Aedes		Animalia	Aedes abserratus	UAM-2019.02-Slikok_Creek_bioinventory-Ento	MG18
http://creativecommons.org/licenses/by/3.0/	UAMObs:Ento:239527	Ochlerotatus excrucians	Diptera	Culicidae	Insecta		(same lot as) KNWR:Ento http://arctos.database.museum/guid/KNWR:Ento:10926	Rebekah Brassfield, Todd Eskelin	12	United States	Alaska	Soldotna, in wetland 510m southwest of Headquarters Lake, Slikok watershed project site MG18, east half of plot	50 m2 sweep net sample	6/16/2016	2016-06-16	2016-06-16	media	60.45455	-151.0773	10970719	wild caught	Arthropoda	Ochlerotatus		Animalia	Ochlerotatus excrucians	UAM-2019.02-Slikok_Creek_bioinventory-Ento	MG18
http://creativecommons.org/licenses/by/3.0/	UAMObs:Ento:240592	Smittia sp. 16ES	Diptera	Chironomidae	Insecta		(same lot as) KNWR:Ento http://arctos.database.museum/guid/KNWR:Ento:11007	Matt Bowser, Tracy Melvin, Annie Dziergowski	12	United States	Alaska	Soldotna, muskeg 230m southeast of Headquarters Lake, Slikok watershed project site MG20, east half of plot	50 m2 sweep net sample	7/20/2016	2016-07-20	2016-07-20	media	60.45415	-151.05908	10977521	wild caught	Arthropoda	Smittia		Animalia		UAM-2019.02-Slikok_Creek_bioinventory-Ento	MG20
http://creativecommons.org/licenses/by/3.0/	UAMObs:Ento:240630	Hemerobius simulans	Neuroptera	Hemerobiidae	Insecta		(same lot as) KNWR:Ento http://arctos.database.museum/guid/KNWR:Ento:11001	Mariah McInnis, Matt Bowser	12	United States	Alaska	Soldotna, Ski Hill Road, off of Howling Hill Trail, Slikok watershed project site MG17, east half of plot	50 m2 sweep net sample	8/9/2016	2016-08-09	2016-08-09	media	60.45475	-151.08641	10977515	wild caught	Arthropoda	Hemerobius		Animalia	Hemerobius simulans	UAM-2019.02-Slikok_Creek_bioinventory-Ento	MG17
http://creativecommons.org/licenses/by/3.0/	UAMObs:Ento:240084	Protapanteles sp. BOLD:ACI4084	Hymenoptera	Braconidae	Insecta		(same lot as) KNWR:Ento http://arctos.database.museum/guid/KNWR:Ento:10978	Joel Stone, Mariah McInnis, Matt Bowser	12	United States	Alaska	Soldotna, forest 2.3km southeast of Headquarters Lake, Slikok watershed project site SK25, east half of plot	50 m2 sweep net sample	7/21/2016	2016-07-21	2016-07-21	media	60.44016	-151.03297	10977492	wild caught	Arthropoda	Protapanteles		Animalia	Protapanteles sp. BOLD:ACI4084	UAM-2019.02-Slikok_Creek_bioinventory-Ento	SK25
http://creativecommons.org/licenses/by/3.0/	UAMObs:Ento:240664	Diptera sp. SlikokOtu1286	Diptera		Insecta		(same lot as) KNWR:Ento http://arctos.database.museum/guid/KNWR:Ento:11005	Mariah McInnis, Matt Bowser	12	United States	Alaska	Soldotna, shore of southeastern bay of Headquarters Lake, Slikok watershed project site MG19, east half of plot	50 m2 sweep net sample	8/3/2016	2016-08-03	2016-08-03	media	60.45435	-151.06819	10977519	wild caught	Arthropoda			Animalia		UAM-2019.02-Slikok_Creek_bioinventory-Ento	MG19
http://creativecommons.org/licenses/by/3.0/	UAMObs:Ento:240666	Diptera sp. SlikokOtu1341	Diptera		Insecta		(same lot as) KNWR:Ento http://arctos.database.museum/guid/KNWR:Ento:11005	Mariah McInnis, Matt Bowser	12	United States	Alaska	Soldotna, shore of southeastern bay of Headquarters Lake, Slikok watershed project site MG19, east half of plot	50 m2 sweep net sample	8/3/2016	2016-08-03	2016-08-03	media	60.45435	-151.06819	10977519	wild caught	Arthropoda			Animalia		UAM-2019.02-Slikok_Creek_bioinventory-Ento	MG19
http://creativecommons.org/licenses/by/3.0/	UAMObs:Ento:240683	Mycomya sp. SlikokOtu1998	Diptera	Mycetophilidae	Insecta		(same lot as) KNWR:Ento http://arctos.database.museum/guid/KNWR:Ento:11005	Mariah McInnis, Matt Bowser	12	United States	Alaska	Soldotna, shore of southeastern bay of Headquarters Lake, Slikok watershed project site MG19, east half of plot	50 m2 sweep net sample	8/3/2016	2016-08-03	2016-08-03	media	60.45435	-151.06819	10977519	wild caught	Arthropoda	Mycomya		Animalia		UAM-2019.02-Slikok_Creek_bioinventory-Ento	MG19
http://creativecommons.org/licenses/by/3.0/	UAMObs:Ento:240695	Ablabesmyia sp. BOLD:ACG3931	Diptera	Chironomidae	Insecta		(same lot as) KNWR:Ento http://arctos.database.museum/guid/KNWR:Ento:11007	Matt Bowser, Tracy Melvin, Annie Dziergowski	12	United States	Alaska	Soldotna, muskeg 230m southeast of Headquarters Lake, Slikok watershed project site MG20, east half of plot	50 m2 sweep net sample	7/20/2016	2016-07-20	2016-07-20	media	60.45415	-151.05908	10977521	wild caught	Arthropoda	Ablabesmyia		Animalia	Ablabesmyia sp. BOLD:ACG3931	UAM-2019.02-Slikok_Creek_bioinventory-Ento	MG20
http://creativecommons.org/licenses/by/3.0/	UAMObs:Ento:240109	Cicadellidae sp. SlikokOtu2269	Hemiptera	Cicadellidae	Insecta		(same lot as) KNWR:Ento http://arctos.database.museum/guid/KNWR:Ento:10981	Matt Bowser	12	United States	Alaska	Soldotna, 100m west of Sterling Highway and 1.3km from intersection with Funny River Road, Slikok watershed project site MG04, east half of plot	50 m2 sweep net sample	8/10/2016	2016-08-10	2016-08-10	media	60.46387	-151.09473	10977495	wild caught	Arthropoda			Animalia		UAM-2019.02-Slikok_Creek_bioinventory-Ento	MG04
http://creativecommons.org/licenses/by/3.0/	UAMObs:Ento:240111	Cyclosa conica	Araneae	Araneidae	Arachnida		(same lot as) KNWR:Ento http://arctos.database.museum/guid/KNWR:Ento:10981	Matt Bowser	12	United States	Alaska	Soldotna, 100m west of Sterling Highway and 1.3km from intersection with Funny River Road, Slikok watershed project site MG04, east half of plot	50 m2 sweep net sample	8/10/2016	2016-08-10	2016-08-10	media	60.46387	-151.09473	10977495	wild caught	Arthropoda	Cyclosa		Animalia	Cyclosa conica	UAM-2019.02-Slikok_Creek_bioinventory-Ento	MG04
http://creativecommons.org/licenses/by/3.0/	UAMObs:Ento:240120	Chironomidae sp. BOLD:AAM6264	Diptera	Chironomidae	Insecta		(same lot as) KNWR:Ento http://arctos.database.museum/guid/KNWR:Ento:10974	Mariah McInnis, Matt Bowser	12	United States	Alaska	Soldotna, forest 880m southeast of Nordic Lake, Slikok watershed project site SK23, east half of plot	50 m2 sweep net sample	8/3/2016	2016-08-03	2016-08-03	media	60.44095	-151.0694	10977488	wild caught	Arthropoda			Animalia	Chironomidae sp. BOLD:AAM6264	UAM-2019.02-Slikok_Creek_bioinventory-Ento	SK23
http://creativecommons.org/licenses/by/3.0/	UAMObs:Ento:240122	Corynoptera blanda	Diptera	Sciaridae	Insecta		(same lot as) KNWR:Ento http://arctos.database.museum/guid/KNWR:Ento:10974	Mariah McInnis, Matt Bowser	12	United States	Alaska	Soldotna, forest 880m southeast of Nordic Lake, Slikok watershed project site SK23, east half of plot	50 m2 sweep net sample	8/3/2016	2016-08-03	2016-08-03	media	60.44095	-151.0694	10977488	wild caught	Arthropoda	Corynoptera		Animalia	Corynoptera blanda	UAM-2019.02-Slikok_Creek_bioinventory-Ento	SK23
http://creativecommons.org/licenses/by/3.0/	UAMObs:Ento:240129	Keroplatidae sp. SlikokOtu1031	Diptera	Keroplatidae	Insecta		(same lot as) KNWR:Ento http://arctos.database.museum/guid/KNWR:Ento:10974	Mariah McInnis, Matt Bowser	12	United States	Alaska	Soldotna, forest 880m southeast of Nordic Lake, Slikok watershed project site SK23, east half of plot	50 m2 sweep net sample	8/3/2016	2016-08-03	2016-08-03	media	60.44095	-151.0694	10977488	wild caught	Arthropoda			Animalia		UAM-2019.02-Slikok_Creek_bioinventory-Ento	SK23
http://creativecommons.org/licenses/by/3.0/	UAMObs:Ento:240133	Megaselia sp. BOLD:AAG3235	Diptera	Phoridae	Insecta		(same lot as) KNWR:Ento http://arctos.database.museum/guid/KNWR:Ento:10974	Mariah McInnis, Matt Bowser	12	United States	Alaska	Soldotna, forest 880m southeast of Nordic Lake, Slikok watershed project site SK23, east half of plot	50 m2 sweep net sample	8/3/2016	2016-08-03	2016-08-03	media	60.44095	-151.0694	10977488	wild caught	Arthropoda	Megaselia		Animalia	Megaselia sp. BOLD:AAG3235	UAM-2019.02-Slikok_Creek_bioinventory-Ento	SK23
http://creativecommons.org/licenses/by/3.0/	UAMObs:Ento:240136	Mesembrina latreillii	Diptera	Muscidae	Insecta		(same lot as) KNWR:Ento http://arctos.database.museum/guid/KNWR:Ento:10974	Mariah McInnis, Matt Bowser	12	United States	Alaska	Soldotna, forest 880m southeast of Nordic Lake, Slikok watershed project site SK23, east half of plot	50 m2 sweep net sample	8/3/2016	2016-08-03	2016-08-03	media	60.44095	-151.0694	10977488	wild caught	Arthropoda	Mesembrina		Animalia	Mesembrina latreillii	UAM-2019.02-Slikok_Creek_bioinventory-Ento	SK23
http://creativecommons.org/licenses/by/3.0/	UAMObs:Ento:240139	Keroplatidae sp. SlikokOtu2237	Diptera	Keroplatidae	Insecta		(same lot as) KNWR:Ento http://arctos.database.museum/guid/KNWR:Ento:10974	Mariah McInnis, Matt Bowser	12	United States	Alaska	Soldotna, forest 880m southeast of Nordic Lake, Slikok watershed project site SK23, east half of plot	50 m2 sweep net sample	8/3/2016	2016-08-03	2016-08-03	media	60.44095	-151.0694	10977488	wild caught	Arthropoda			Animalia		UAM-2019.02-Slikok_Creek_bioinventory-Ento	SK23
http://creativecommons.org/licenses/by/3.0/	UAMObs:Ento:240700	Cicadellidae sp. nr. Ophiola decumana	Hemiptera	Cicadellidae	Insecta		(same lot as) KNWR:Ento http://arctos.database.museum/guid/KNWR:Ento:11007	Matt Bowser, Tracy Melvin, Annie Dziergowski	12	United States	Alaska	Soldotna, muskeg 230m southeast of Headquarters Lake, Slikok watershed project site MG20, east half of plot	50 m2 sweep net sample	7/20/2016	2016-07-20	2016-07-20	media	60.45415	-151.05908	10977521	wild caught	Arthropoda			Animalia		UAM-2019.02-Slikok_Creek_bioinventory-Ento	MG20
http://creativecommons.org/licenses/by/3.0/	UAMObs:Ento:240146	Nabis americoferus	Hemiptera	Nabidae	Insecta		(same lot as) KNWR:Ento http://arctos.database.museum/guid/KNWR:Ento:10974	Mariah McInnis, Matt Bowser	12	United States	Alaska	Soldotna, forest 880m southeast of Nordic Lake, Slikok watershed project site SK23, east half of plot	50 m2 sweep net sample	8/3/2016	2016-08-03	2016-08-03	media	60.44095	-151.0694	10977488	wild caught	Arthropoda	Nabis		Animalia	Nabis americoferus	UAM-2019.02-Slikok_Creek_bioinventory-Ento	SK23
http://creativecommons.org/licenses/by/3.0/	UAMObs:Ento:240156	Phaonia apicalis	Diptera	Muscidae	Insecta		(same lot as) KNWR:Ento http://arctos.database.museum/guid/KNWR:Ento:10974	Mariah McInnis, Matt Bowser	12	United States	Alaska	Soldotna, forest 880m southeast of Nordic Lake, Slikok watershed project site SK23, east half of plot	50 m2 sweep net sample	8/3/2016	2016-08-03	2016-08-03	media	60.44095	-151.0694	10977488	wild caught	Arthropoda	Phaonia		Animalia	Phaonia apicalis	UAM-2019.02-Slikok_Creek_bioinventory-Ento	SK23
http://creativecommons.org/licenses/by/3.0/	UAMObs:Ento:240169	Anacharis eucharoides	Hymenoptera	Figitidae	Insecta		(same lot as) KNWR:Ento http://arctos.database.museum/guid/KNWR:Ento:10976	Mariah McInnis, Matt Bowser	12	United States	Alaska	Soldotna, stream 1.7km south-southeast of Headquarters Lake, Slikok watershed project site SK24, east half of plot	50 m2 sweep net sample	7/29/2016	2016-07-29	2016-07-29	media	60.44056	-151.05118	10977490	wild caught	Arthropoda	Anacharis		Animalia	Anacharis eucharoides	UAM-2019.02-Slikok_Creek_bioinventory-Ento	SK24
http://creativecommons.org/licenses/by/3.0/	UAMObs:Ento:240174	Coenosia conforma	Diptera	Muscidae	Insecta		(same lot as) KNWR:Ento http://arctos.database.museum/guid/KNWR:Ento:10976	Mariah McInnis, Matt Bowser	12	United States	Alaska	Soldotna, stream 1.7km south-southeast of Headquarters Lake, Slikok watershed project site SK24, east half of plot	50 m2 sweep net sample	7/29/2016	2016-07-29	2016-07-29	media	60.44056	-151.05118	10977490	wild caught	Arthropoda	Coenosia		Animalia	Coenosia conforma	UAM-2019.02-Slikok_Creek_bioinventory-Ento	SK24
http://creativecommons.org/licenses/by/3.0/	UAMObs:Ento:240178	Hydrotaea sp. SlikokOtu1967	Diptera	Muscidae	Insecta		(same lot as) KNWR:Ento http://arctos.database.museum/guid/KNWR:Ento:10976	Mariah McInnis, Matt Bowser	12	United States	Alaska	Soldotna, stream 1.7km south-southeast of Headquarters Lake, Slikok watershed project site SK24, east half of plot	50 m2 sweep net sample	7/29/2016	2016-07-29	2016-07-29	media	60.44056	-151.05118	10977490	wild caught	Arthropoda	Hydrotaea		Animalia		UAM-2019.02-Slikok_Creek_bioinventory-Ento	SK24
http://creativecommons.org/licenses/by/3.0/	UAMObs:Ento:240179	Hydrotaea pilitibia	Diptera	Muscidae	Insecta		(same lot as) KNWR:Ento http://arctos.database.museum/guid/KNWR:Ento:10976	Mariah McInnis, Matt Bowser	12	United States	Alaska	Soldotna, stream 1.7km south-southeast of Headquarters Lake, Slikok watershed project site SK24, east half of plot	50 m2 sweep net sample	7/29/2016	2016-07-29	2016-07-29	media	60.44056	-151.05118	10977490	wild caught	Arthropoda	Hydrotaea		Animalia	Hydrotaea pilitibia	UAM-2019.02-Slikok_Creek_bioinventory-Ento	SK24
http://creativecommons.org/licenses/by/3.0/	UAMObs:Ento:240745	Mesembrina latreillii	Diptera	Muscidae	Insecta		(same lot as) KNWR:Ento http://arctos.database.museum/guid/KNWR:Ento:11009	Matt Bowser, Tracy Melvin, Annie Dziergowski	12	United States	Alaska	Soldotna, forest 720km southeast of Headquarters Lake, Slikok watershed project site MG21, east half of plot	50 m2 sweep net sample	7/20/2016	2016-07-20	2016-07-20	media	60.45396	-151.04997	10977523	wild caught	Arthropoda	Mesembrina		Animalia	Mesembrina latreillii	UAM-2019.02-Slikok_Creek_bioinventory-Ento	MG21
http://creativecommons.org/licenses/by/3.0/	UAMObs:Ento:240751	Ichneumoninae sp. BOLD:ACM0987	Hymenoptera	Ichneumonidae	Insecta		(same lot as) KNWR:Ento http://arctos.database.museum/guid/KNWR:Ento:11011	Mariah McInnis, Matt Bowser	12	United States	Alaska	Soldotna, muskeg 250m east of Arc Lake, Slikok watershed project site MG22, east half of plot	50 m2 sweep net sample	8/9/2016	2016-08-09	2016-08-09	media	60.45048	-151.09592	10977525	wild caught	Arthropoda			Animalia	Ichneumoninae sp. BOLD:ACM0987	UAM-2019.02-Slikok_Creek_bioinventory-Ento	MG22
http://creativecommons.org/licenses/by/3.0/	UAMObs:Ento:240753	Limotettix arctostaphyli	Hemiptera	Cicadellidae	Insecta		(same lot as) KNWR:Ento http://arctos.database.museum/guid/KNWR:Ento:11011	Mariah McInnis, Matt Bowser	12	United States	Alaska	Soldotna, muskeg 250m east of Arc Lake, Slikok watershed project site MG22, east half of plot	50 m2 sweep net sample	8/9/2016	2016-08-09	2016-08-09	media	60.45048	-151.09592	10977525	wild caught	Arthropoda	Limotettix		Animalia	Limotettix arctostaphyli	UAM-2019.02-Slikok_Creek_bioinventory-Ento	MG22
http://creativecommons.org/licenses/by/3.0/	UAMObs:Ento:240771	Megaselia sp. BOLD:ACC9898	Diptera	Phoridae	Insecta		(same lot as) KNWR:Ento http://arctos.database.museum/guid/KNWR:Ento:11013	Mariah McInnis, Matt Bowser	12	United States	Alaska	Soldotna, forest 120m east of Nordic Lake, Slikok watershed project site MG24, east half of plot	50 m2 sweep net sample	8/3/2016	2016-08-03	2016-08-03	media	60.45008	-151.0777	10977527	wild caught	Arthropoda	Megaselia		Animalia	Megaselia sp. BOLD:ACC9898	UAM-2019.02-Slikok_Creek_bioinventory-Ento	MG24
http://creativecommons.org/licenses/by/3.0/	UAMObs:Ento:240210	Scatopsciara neglecta	Diptera	Sciaridae	Insecta		(same lot as) KNWR:Ento http://arctos.database.museum/guid/KNWR:Ento:10985	Mariah McInnis, Matt Bowser	12	United States	Alaska	Soldotna, Ski Hill Road, ski trails between new visitor center and old septic leach field, Slikok watershed project site MG06, east half of plot	50 m2 sweep net sample	7/18/2016	2016-07-18	2016-07-18	media	60.46348	-151.0765	10977499	wild caught	Arthropoda	Scatopsciara		Animalia	Scatopsciara neglecta	UAM-2019.02-Slikok_Creek_bioinventory-Ento	MG06
http://creativecommons.org/licenses/by/3.0/	UAMObs:Ento:240214	Tydeus sp. BOLD:ABV1816	Trombidiformes	Tydeidae	Arachnida		(same lot as) KNWR:Ento http://arctos.database.museum/guid/KNWR:Ento:10985	Mariah McInnis, Matt Bowser	12	United States	Alaska	Soldotna, Ski Hill Road, ski trails between new visitor center and old septic leach field, Slikok watershed project site MG06, east half of plot	50 m2 sweep net sample	7/18/2016	2016-07-18	2016-07-18	media	60.46348	-151.0765	10977499	wild caught	Arthropoda	Tydeus		Animalia	Tydeus sp. BOLD:ABV1816	UAM-2019.02-Slikok_Creek_bioinventory-Ento	MG06
http://creativecommons.org/licenses/by/3.0/	UAMObs:Ento:240218	Brevicornu sp. BOLD:AAM8961	Diptera	Mycetophilidae	Insecta		(same lot as) KNWR:Ento http://arctos.database.museum/guid/KNWR:Ento:10986	Matt Bowser	12	United States	Alaska	Soldotna, muskeg 120m northeast of Headquarters Lake, Slikok watershed project site MG08, east half of plot	50 m2 sweep net sample	7/22/2016	2016-07-22	2016-07-22	media	60.46309	-151.05827	10977500	wild caught	Arthropoda	Brevicornu		Animalia	Brevicornu sp. BOLD:AAM8961	UAM-2019.02-Slikok_Creek_bioinventory-Ento	MG08
http://creativecommons.org/licenses/by/3.0/	UAMObs:Ento:240780	Simulium arcticum complex	Diptera	Simuliidae	Insecta		(same lot as) KNWR:Ento http://arctos.database.museum/guid/KNWR:Ento:11013	Mariah McInnis, Matt Bowser	12	United States	Alaska	Soldotna, forest 120m east of Nordic Lake, Slikok watershed project site MG24, east half of plot	50 m2 sweep net sample	8/3/2016	2016-08-03	2016-08-03	media	60.45008	-151.0777	10977527	wild caught	Arthropoda	Simulium		Animalia		UAM-2019.02-Slikok_Creek_bioinventory-Ento	MG24
http://creativecommons.org/licenses/by/3.0/	UAMObs:Ento:240784	Theridion saanichum	Araneae	Theridiidae	Arachnida		(same lot as) KNWR:Ento http://arctos.database.museum/guid/KNWR:Ento:11013	Mariah McInnis, Matt Bowser	12	United States	Alaska	Soldotna, forest 120m east of Nordic Lake, Slikok watershed project site MG24, east half of plot	50 m2 sweep net sample	8/3/2016	2016-08-03	2016-08-03	media	60.45008	-151.0777	10977527	wild caught	Arthropoda	Theridion		Animalia	Theridion saanichum	UAM-2019.02-Slikok_Creek_bioinventory-Ento	MG24
http://creativecommons.org/licenses/by/3.0/	UAMObs:Ento:240792	Estrandia grandaeva	Araneae	Linyphiidae	Arachnida		(same lot as) KNWR:Ento http://arctos.database.museum/guid/KNWR:Ento:11015	Matt Bowser, Tracy Melvin, Annie Dziergowski	12	United States	Alaska	Soldotna, forest 600m south-southeast of Headquarters Lake, Slikok watershed project site MG26, east half of plot	50 m2 sweep net sample	7/20/2016	2016-07-20	2016-07-20	media	60.44969	-151.05948	10977529	wild caught	Arthropoda	Estrandia		Animalia	Estrandia grandaeva	UAM-2019.02-Slikok_Creek_bioinventory-Ento	MG26
http://creativecommons.org/licenses/by/3.0/	UAMObs:Ento:240243	Euconulus fulvus	Stylommatophora	Helicarionidae	Gastropoda		(same lot as) KNWR:Ento http://arctos.database.museum/guid/KNWR:Ento:10981	Matt Bowser	12	United States	Alaska	Soldotna, 100m west of Sterling Highway and 1.3km from intersection with Funny River Road, Slikok watershed project site MG04, east half of plot	50 m2 sweep net sample	8/10/2016	2016-08-10	2016-08-10	media	60.46387	-151.09473	10977495	wild caught	Mollusca	Euconulus		Animalia	Euconulus fulvus	UAM-2019.02-Slikok_Creek_bioinventory-Ento	MG04
http://creativecommons.org/licenses/by/3.0/	UAMObs:Ento:240246	Hemerobius simulans	Neuroptera	Hemerobiidae	Insecta		(same lot as) KNWR:Ento http://arctos.database.museum/guid/KNWR:Ento:10981	Matt Bowser	12	United States	Alaska	Soldotna, 100m west of Sterling Highway and 1.3km from intersection with Funny River Road, Slikok watershed project site MG04, east half of plot	50 m2 sweep net sample	8/10/2016	2016-08-10	2016-08-10	media	60.46387	-151.09473	10977495	wild caught	Arthropoda	Hemerobius		Animalia	Hemerobius simulans	UAM-2019.02-Slikok_Creek_bioinventory-Ento	MG04
http://creativecommons.org/licenses/by/3.0/	UAMObs:Ento:240829	Proclitus paganus	Hymenoptera	Ichneumonidae	Insecta		(same lot as) KNWR:Ento http://arctos.database.museum/guid/KNWR:Ento:11017	Mariah McInnis, Matt Bowser	12	United States	Alaska	Soldotna, forest 380m southeast of Arc Lake, Slikok watershed project site MG28, east half of plot	50 m2 sweep net sample	8/9/2016	2016-08-09	2016-08-09	media	60.44601	-151.09632	10977531	wild caught	Arthropoda	Proclitus		Animalia	Proclitus paganus	UAM-2019.02-Slikok_Creek_bioinventory-Ento	MG28
http://creativecommons.org/licenses/by/3.0/	UAMObs:Ento:240830	Scatopsciara atomaria	Diptera	Sciaridae	Insecta		(same lot as) KNWR:Ento http://arctos.database.museum/guid/KNWR:Ento:11017	Mariah McInnis, Matt Bowser	12	United States	Alaska	Soldotna, forest 380m southeast of Arc Lake, Slikok watershed project site MG28, east half of plot	50 m2 sweep net sample	8/9/2016	2016-08-09	2016-08-09	media	60.44601	-151.09632	10977531	wild caught	Arthropoda	Scatopsciara		Animalia	Scatopsciara atomaria	UAM-2019.02-Slikok_Creek_bioinventory-Ento	MG28
http://creativecommons.org/licenses/by/3.0/	UAMObs:Ento:240843	Orthocladiinae sp. BOLD:ACC1222	Diptera	Chironomidae	Insecta		(same lot as) KNWR:Ento http://arctos.database.museum/guid/KNWR:Ento:11023	Mariah McInnis, Matt Bowser	12	United States	Alaska	Soldotna, forest 980m south of Headquarters Lake, Slikok watershed project site MG31, east half of plot	50 m2 sweep net sample	7/29/2016	2016-07-29	2016-07-29	media	60.44542	-151.069	10977537	wild caught	Arthropoda			Animalia	Orthocladiinae sp. BOLD:ACC1222	UAM-2019.02-Slikok_Creek_bioinventory-Ento	MG31
http://creativecommons.org/licenses/by/3.0/	UAMObs:Ento:240844	Philodromus sp. BOLD:AAA9991	Araneae	Philodromidae	Arachnida		(same lot as) KNWR:Ento http://arctos.database.museum/guid/KNWR:Ento:11023	Mariah McInnis, Matt Bowser	12	United States	Alaska	Soldotna, forest 980m south of Headquarters Lake, Slikok watershed project site MG31, east half of plot	50 m2 sweep net sample	7/29/2016	2016-07-29	2016-07-29	media	60.44542	-151.069	10977537	wild caught	Arthropoda	Philodromus		Animalia	Philodromus sp. BOLD:AAA9991	UAM-2019.02-Slikok_Creek_bioinventory-Ento	MG31
http://creativecommons.org/licenses/by/3.0/	UAMObs:Ento:240860	Diapriidae sp. SlikokOtu2020	Hymenoptera	Diapriidae	Insecta		(same lot as) KNWR:Ento http://arctos.database.museum/guid/KNWR:Ento:11025	Mariah McInnis, Matt Bowser	12	United States	Alaska	Soldotna, forest 1km south of Headquarters Lake, Slikok watershed project site MG32, east half of plot	50 m2 sweep net sample	7/29/2016	2016-07-29	2016-07-29	media	60.44522	-151.05989	10977539	wild caught	Arthropoda			Animalia		UAM-2019.02-Slikok_Creek_bioinventory-Ento	MG32
http://creativecommons.org/licenses/by/3.0/	UAMObs:Ento:240297	Corynoptera sp. BOLD:ADK6917	Diptera	Sciaridae	Insecta		(same lot as) KNWR:Ento http://arctos.database.museum/guid/KNWR:Ento:10983	Joel Stone, Matt Bowser	12	United States	Alaska	Soldotna, Ski Hill Road, Slikok watershed project site MG05, east half of plot	50 m2 sweep net sample	7/22/2016	2016-07-22	2016-07-22	media	60.46368	-151.08561	10977497	wild caught	Arthropoda	Corynoptera		Animalia	Corynoptera sp. BOLD:ADK6917	UAM-2019.02-Slikok_Creek_bioinventory-Ento	MG05
http://creativecommons.org/licenses/by/3.0/	UAMObs:Ento:240318	Heleomyzidae sp. BOLD:AAG0465	Diptera	Heleomyzidae	Insecta		(same lot as) KNWR:Ento http://arctos.database.museum/guid/KNWR:Ento:10985	Mariah McInnis, Matt Bowser	12	United States	Alaska	Soldotna, Ski Hill Road, ski trails between new visitor center and old septic leach field, Slikok watershed project site MG06, east half of plot	50 m2 sweep net sample	7/18/2016	2016-07-18	2016-07-18	media	60.46348	-151.0765	10977499	wild caught	Arthropoda			Animalia	Heleomyzidae sp. BOLD:AAG0465	UAM-2019.02-Slikok_Creek_bioinventory-Ento	MG06
http://creativecommons.org/licenses/by/3.0/	UAMObs:Ento:240322	Macrocera stigma	Diptera	Keroplatidae	Insecta		(same lot as) KNWR:Ento http://arctos.database.museum/guid/KNWR:Ento:10985	Mariah McInnis, Matt Bowser	12	United States	Alaska	Soldotna, Ski Hill Road, ski trails between new visitor center and old septic leach field, Slikok watershed project site MG06, east half of plot	50 m2 sweep net sample	7/18/2016	2016-07-18	2016-07-18	media	60.46348	-151.0765	10977499	wild caught	Arthropoda	Macrocera		Animalia	Macrocera stigma	UAM-2019.02-Slikok_Creek_bioinventory-Ento	MG06
http://creativecommons.org/licenses/by/3.0/	UAMObs:Ento:240885	Columella sp. BOLD:ABV1789	Pulmonata	Truncatellinidae	Gastropoda		(same lot as) KNWR:Ento http://arctos.database.museum/guid/KNWR:Ento:11027	Mariah McInnis, Joel Stone, Matt Bowser	12	United States	Alaska	Soldotna, forest 1.3km southeast of Headquarters Lake, Slikok watershed project site MG33, east half of plot	50 m2 sweep net sample	7/21/2016	2016-07-21	2016-07-21	media	60.44502	-151.05078	10977541	wild caught	Mollusca	Columella		Animalia	Columella sp. BOLD:ABV1789	UAM-2019.02-Slikok_Creek_bioinventory-Ento	MG33
http://creativecommons.org/licenses/by/3.0/	UAMObs:Ento:240897	Vespula alascensis	Hymenoptera	Vespidae	Insecta		(same lot as) KNWR:Ento http://arctos.database.museum/guid/KNWR:Ento:11027	Mariah McInnis, Joel Stone, Matt Bowser	12	United States	Alaska	Soldotna, forest 1.3km southeast of Headquarters Lake, Slikok watershed project site MG33, east half of plot	50 m2 sweep net sample	7/21/2016	2016-07-21	2016-07-21	media	60.44502	-151.05078	10977541	wild caught	Arthropoda	Vespula		Animalia	Vespula alascensis	UAM-2019.02-Slikok_Creek_bioinventory-Ento	MG33
http://creativecommons.org/licenses/by/3.0/	UAMObs:Ento:240900	Allodia sp. BOLD:ACC5209	Diptera	Mycetophilidae	Insecta		(same lot as) KNWR:Ento http://arctos.database.museum/guid/KNWR:Ento:11019	Mariah McInnis, Matt Bowser	12	United States	Alaska	Soldotna, forest 180m southwest of Nordic Lake, Slikok watershed project site MG29, east half of plot	50 m2 sweep net sample	8/9/2016	2016-08-09	2016-08-09	media	60.44581	-151.08721	10977533	wild caught	Arthropoda	Allodia		Animalia	Allodia sp. BOLD:ACC5209	UAM-2019.02-Slikok_Creek_bioinventory-Ento	MG29
http://creativecommons.org/licenses/by/3.0/	UAMObs:Ento:240906	Exechia parva	Diptera	Mycetophilidae	Insecta		(same lot as) KNWR:Ento http://arctos.database.museum/guid/KNWR:Ento:11019	Mariah McInnis, Matt Bowser	12	United States	Alaska	Soldotna, forest 180m southwest of Nordic Lake, Slikok watershed project site MG29, east half of plot	50 m2 sweep net sample	8/9/2016	2016-08-09	2016-08-09	media	60.44581	-151.08721	10977533	wild caught	Arthropoda	Exechia		Animalia	Exechia parva	UAM-2019.02-Slikok_Creek_bioinventory-Ento	MG29
http://creativecommons.org/licenses/by/3.0/	UAMObs:Ento:240908	Megaselia sp. BOLD:AAG3234	Diptera	Phoridae	Insecta		(same lot as) KNWR:Ento http://arctos.database.museum/guid/KNWR:Ento:11019	Mariah McInnis, Matt Bowser	12	United States	Alaska	Soldotna, forest 180m southwest of Nordic Lake, Slikok watershed project site MG29, east half of plot	50 m2 sweep net sample	8/9/2016	2016-08-09	2016-08-09	media	60.44581	-151.08721	10977533	wild caught	Arthropoda	Megaselia		Animalia	Megaselia sp. BOLD:AAG3234	UAM-2019.02-Slikok_Creek_bioinventory-Ento	MG29
http://creativecommons.org/licenses/by/3.0/	UAMObs:Ento:240912	Mycetophila alea	Diptera	Mycetophilidae	Insecta		(same lot as) KNWR:Ento http://arctos.database.museum/guid/KNWR:Ento:11019	Mariah McInnis, Matt Bowser	12	United States	Alaska	Soldotna, forest 180m southwest of Nordic Lake, Slikok watershed project site MG29, east half of plot	50 m2 sweep net sample	8/9/2016	2016-08-09	2016-08-09	media	60.44581	-151.08721	10977533	wild caught	Arthropoda	Mycetophila		Animalia	Mycetophila alea	UAM-2019.02-Slikok_Creek_bioinventory-Ento	MG29
http://creativecommons.org/licenses/by/3.0/	UAMObs:Ento:240934	Cicadellidae sp. nr. Ophiola decumana	Hemiptera	Cicadellidae	Insecta		(same lot as) KNWR:Ento http://arctos.database.museum/guid/KNWR:Ento:11021	Mariah McInnis, Matt Bowser	12	United States	Alaska	Soldotna, forest 180m south-southeast of Nordic Lake, Slikok watershed project site MG30, east half of plot	50 m2 sweep net sample	8/3/2016	2016-08-03	2016-08-03	media	60.44562	-151.0781	10977535	wild caught	Arthropoda			Animalia		UAM-2019.02-Slikok_Creek_bioinventory-Ento	MG30
http://creativecommons.org/licenses/by/3.0/	UAMObs:Ento:240935	Cicadellidae sp. SlikokOtu2339	Hemiptera	Cicadellidae	Insecta		(same lot as) KNWR:Ento http://arctos.database.museum/guid/KNWR:Ento:11021	Mariah McInnis, Matt Bowser	12	United States	Alaska	Soldotna, forest 180m south-southeast of Nordic Lake, Slikok watershed project site MG30, east half of plot	50 m2 sweep net sample	8/3/2016	2016-08-03	2016-08-03	media	60.44562	-151.0781	10977535	wild caught	Arthropoda			Animalia		UAM-2019.02-Slikok_Creek_bioinventory-Ento	MG30
http://creativecommons.org/licenses/by/3.0/	UAMObs:Ento:240936	Drosophila subquinaria	Diptera	Drosophilidae	Insecta		(same lot as) KNWR:Ento http://arctos.database.museum/guid/KNWR:Ento:11021	Mariah McInnis, Matt Bowser	12	United States	Alaska	Soldotna, forest 180m south-southeast of Nordic Lake, Slikok watershed project site MG30, east half of plot	50 m2 sweep net sample	8/3/2016	2016-08-03	2016-08-03	media	60.44562	-151.0781	10977535	wild caught	Arthropoda	Drosophila		Animalia	Drosophila subquinaria	UAM-2019.02-Slikok_Creek_bioinventory-Ento	MG30
http://creativecommons.org/licenses/by/3.0/	UAMObs:Ento:240943	Oncophanes sp. BOLD:AAH2152	Hymenoptera	Braconidae	Insecta		(same lot as) KNWR:Ento http://arctos.database.museum/guid/KNWR:Ento:11021	Mariah McInnis, Matt Bowser	12	United States	Alaska	Soldotna, forest 180m south-southeast of Nordic Lake, Slikok watershed project site MG30, east half of plot	50 m2 sweep net sample	8/3/2016	2016-08-03	2016-08-03	media	60.44562	-151.0781	10977535	wild caught	Arthropoda	Oncophanes		Animalia	Oncophanes sp. BOLD:AAH2152	UAM-2019.02-Slikok_Creek_bioinventory-Ento	MG30
http://creativecommons.org/licenses/by/3.0/	UAMObs:Ento:240439	Emblyna manitoba	Araneae	Dictynidae	Arachnida		(same lot as) KNWR:Ento http://arctos.database.museum/guid/KNWR:Ento:10988	Matt Bowser	12	United States	Alaska	Soldotna, muskeg 0.6km northeast of Headquarters Lake, Slikok watershed project site MG09, east half of plot	50 m2 sweep net sample	7/19/2016	2016-07-19	2016-07-19	media	60.46289	-151.04916	10977502	wild caught	Arthropoda	Emblyna		Animalia	Emblyna manitoba	UAM-2019.02-Slikok_Creek_bioinventory-Ento	MG09
http://creativecommons.org/licenses/by/3.0/	UAMObs:Ento:240441	Forcipata loca	Hemiptera	Cicadellidae	Insecta		(same lot as) KNWR:Ento http://arctos.database.museum/guid/KNWR:Ento:10988	Matt Bowser	12	United States	Alaska	Soldotna, muskeg 0.6km northeast of Headquarters Lake, Slikok watershed project site MG09, east half of plot	50 m2 sweep net sample	7/19/2016	2016-07-19	2016-07-19	media	60.46289	-151.04916	10977502	wild caught	Arthropoda	Forcipata		Animalia	Forcipata loca	UAM-2019.02-Slikok_Creek_bioinventory-Ento	MG09
http://creativecommons.org/licenses/by/3.0/	UAMObs:Ento:240451	Philodromus sp. BOLD:AAA9991	Araneae	Philodromidae	Arachnida		(same lot as) KNWR:Ento http://arctos.database.museum/guid/KNWR:Ento:10988	Matt Bowser	12	United States	Alaska	Soldotna, muskeg 0.6km northeast of Headquarters Lake, Slikok watershed project site MG09, east half of plot	50 m2 sweep net sample	7/19/2016	2016-07-19	2016-07-19	media	60.46289	-151.04916	10977502	wild caught	Arthropoda	Philodromus		Animalia	Philodromus sp. BOLD:AAA9991	UAM-2019.02-Slikok_Creek_bioinventory-Ento	MG09
http://creativecommons.org/licenses/by/3.0/	UAMObs:Ento:240453	Rhopobota naevana	Lepidoptera	Tortricidae	Insecta		(same lot as) KNWR:Ento http://arctos.database.museum/guid/KNWR:Ento:10988	Matt Bowser	12	United States	Alaska	Soldotna, muskeg 0.6km northeast of Headquarters Lake, Slikok watershed project site MG09, east half of plot	50 m2 sweep net sample	7/19/2016	2016-07-19	2016-07-19	media	60.46289	-151.04916	10977502	wild caught	Arthropoda	Rhopobota		Animalia	Rhopobota naevana	UAM-2019.02-Slikok_Creek_bioinventory-Ento	MG09
http://creativecommons.org/licenses/by/3.0/	UAMObs:Ento:240454	Rhysodromus mysticus	Araneae	Philodromidae	Arachnida		(same lot as) KNWR:Ento http://arctos.database.museum/guid/KNWR:Ento:10988	Matt Bowser	12	United States	Alaska	Soldotna, muskeg 0.6km northeast of Headquarters Lake, Slikok watershed project site MG09, east half of plot	50 m2 sweep net sample	7/19/2016	2016-07-19	2016-07-19	media	60.46289	-151.04916	10977502	wild caught	Arthropoda	Rhysodromus		Animalia	Rhysodromus mysticus	UAM-2019.02-Slikok_Creek_bioinventory-Ento	MG09
http://creativecommons.org/licenses/by/3.0/	UAMObs:Ento:240458	Tomosvaryella kuthyi	Diptera	Pipunculidae	Insecta		(same lot as) KNWR:Ento http://arctos.database.museum/guid/KNWR:Ento:10988	Matt Bowser	12	United States	Alaska	Soldotna, muskeg 0.6km northeast of Headquarters Lake, Slikok watershed project site MG09, east half of plot	50 m2 sweep net sample	7/19/2016	2016-07-19	2016-07-19	media	60.46289	-151.04916	10977502	wild caught	Arthropoda	Tomosvaryella		Animalia	Tomosvaryella kuthyi	UAM-2019.02-Slikok_Creek_bioinventory-Ento	MG09
http://creativecommons.org/licenses/by/3.0/	UAMObs:Ento:240501	Dinotrema sp. jft01	Hymenoptera	Braconidae	Insecta		(same lot as) KNWR:Ento http://arctos.database.museum/guid/KNWR:Ento:10990	Mariah McInnis, Matt Bowser	12	United States	Alaska	Soldotna, woods on north shore of Headquarters Lake 200m east of Keen Eye Trail floating dock, Slikok watershed project site MG07, east half of plot	50 m2 sweep net sample	8/1/2016	2016-08-01	2016-08-01	media	60.46328	-151.06739	10977504	wild caught	Arthropoda	Dinotrema		Animalia		UAM-2019.02-Slikok_Creek_bioinventory-Ento	MG07
http://creativecommons.org/licenses/by/3.0/	UAMObs:Ento:240512	Pityohyphantes alticeps	Araneae	Linyphiidae	Arachnida		(same lot as) KNWR:Ento http://arctos.database.museum/guid/KNWR:Ento:10990	Mariah McInnis, Matt Bowser	12	United States	Alaska	Soldotna, woods on north shore of Headquarters Lake 200m east of Keen Eye Trail floating dock, Slikok watershed project site MG07, east half of plot	50 m2 sweep net sample	8/1/2016	2016-08-01	2016-08-01	media	60.46328	-151.06739	10977504	wild caught	Arthropoda	Pityohyphantes		Animalia	Pityohyphantes alticeps	UAM-2019.02-Slikok_Creek_bioinventory-Ento	MG07
http://creativecommons.org/licenses/by/3.0/	UAMObs:Ento:240513	Plectiscidea sp. BOLD:ACJ0639	Hymenoptera	Ichneumonidae	Insecta		(same lot as) KNWR:Ento http://arctos.database.museum/guid/KNWR:Ento:10990	Mariah McInnis, Matt Bowser	12	United States	Alaska	Soldotna, woods on north shore of Headquarters Lake 200m east of Keen Eye Trail floating dock, Slikok watershed project site MG07, east half of plot	50 m2 sweep net sample	8/1/2016	2016-08-01	2016-08-01	media	60.46328	-151.06739	10977504	wild caught	Arthropoda	Plectiscidea		Animalia	Plectiscidea sp. BOLD:ACJ0639	UAM-2019.02-Slikok_Creek_bioinventory-Ento	MG07
http://creativecommons.org/licenses/by/3.0/	UAMObs:Ento:240523	Cryptinae sp. BOLD:AAN8142	Hymenoptera	Ichneumonidae	Insecta		(same lot as) KNWR:Ento http://arctos.database.museum/guid/KNWR:Ento:10993	Matt Bowser	12	United States	Alaska	Soldotna, 40m east of Sterling Highway 480m northeast of intersection with south end of Ski Hill Road, Slikok watershed project site MG10, east half of plot	50 m2 sweep net sample	8/10/2016	2016-08-10	2016-08-10	media	60.45941	-151.09513	10977507	wild caught	Arthropoda			Animalia	Cryptinae sp. BOLD:AAN8142	UAM-2019.02-Slikok_Creek_bioinventory-Ento	MG10
http://creativecommons.org/licenses/by/3.0/	UAMObs:Ento:240524	Deroceras laeve	Stylommatophora	Limacidae	Gastropoda		(same lot as) KNWR:Ento http://arctos.database.museum/guid/KNWR:Ento:10993	Matt Bowser	12	United States	Alaska	Soldotna, 40m east of Sterling Highway 480m northeast of intersection with south end of Ski Hill Road, Slikok watershed project site MG10, east half of plot	50 m2 sweep net sample	8/10/2016	2016-08-10	2016-08-10	media	60.45941	-151.09513	10977507	wild caught	Mollusca	Deroceras		Animalia	Deroceras laeve	UAM-2019.02-Slikok_Creek_bioinventory-Ento	MG10
http://creativecommons.org/licenses/by/3.0/	UAMObs:Ento:240530	Ichneumonidae sp. SlikokOtu1186	Hymenoptera	Ichneumonidae	Insecta		(same lot as) KNWR:Ento http://arctos.database.museum/guid/KNWR:Ento:10993	Matt Bowser	12	United States	Alaska	Soldotna, 40m east of Sterling Highway 480m northeast of intersection with south end of Ski Hill Road, Slikok watershed project site MG10, east half of plot	50 m2 sweep net sample	8/10/2016	2016-08-10	2016-08-10	media	60.45941	-151.09513	10977507	wild caught	Arthropoda			Animalia		UAM-2019.02-Slikok_Creek_bioinventory-Ento	MG10
http://creativecommons.org/licenses/by/3.0/	UAMObs:Ento:240535	Phronia sp. SlikokOtu1783	Diptera	Mycetophilidae	Insecta		(same lot as) KNWR:Ento http://arctos.database.museum/guid/KNWR:Ento:10993	Matt Bowser	12	United States	Alaska	Soldotna, 40m east of Sterling Highway 480m northeast of intersection with south end of Ski Hill Road, Slikok watershed project site MG10, east half of plot	50 m2 sweep net sample	8/10/2016	2016-08-10	2016-08-10	media	60.45941	-151.09513	10977507	wild caught	Arthropoda	Phronia		Animalia		UAM-2019.02-Slikok_Creek_bioinventory-Ento	MG10
http://creativecommons.org/licenses/by/3.0/	UAMObs:Ento:240542	Trichadenotecnum majus	Psocodea	Psocidae	Insecta		(same lot as) KNWR:Ento http://arctos.database.museum/guid/KNWR:Ento:10993	Matt Bowser	12	United States	Alaska	Soldotna, 40m east of Sterling Highway 480m northeast of intersection with south end of Ski Hill Road, Slikok watershed project site MG10, east half of plot	50 m2 sweep net sample	8/10/2016	2016-08-10	2016-08-10	media	60.45941	-151.09513	10977507	wild caught	Arthropoda	Trichadenotecnum		Animalia	Trichadenotecnum majus	UAM-2019.02-Slikok_Creek_bioinventory-Ento	MG10
http://creativecommons.org/licenses/by/3.0/	UAMObs:Ento:240543	Trichonta sp. BOLD:ACX5388	Diptera	Mycetophilidae	Insecta		(same lot as) KNWR:Ento http://arctos.database.museum/guid/KNWR:Ento:10993	Matt Bowser	12	United States	Alaska	Soldotna, 40m east of Sterling Highway 480m northeast of intersection with south end of Ski Hill Road, Slikok watershed project site MG10, east half of plot	50 m2 sweep net sample	8/10/2016	2016-08-10	2016-08-10	media	60.45941	-151.09513	10977507	wild caught	Arthropoda	Trichonta		Animalia	Trichonta sp. BOLD:ACX5388	UAM-2019.02-Slikok_Creek_bioinventory-Ento	MG10
http://creativecommons.org/licenses/by/3.0/	UAMObs:Ento:240553	Ichneumoninae sp. BOLD:ACM0987	Hymenoptera	Ichneumonidae	Insecta		(same lot as) KNWR:Ento http://arctos.database.museum/guid/KNWR:Ento:10995	Mariah McInnis, Matt Bowser	12	United States	Alaska	Soldotna, in wetland 400m south-southwest of floatplane dock on Headquarters Lake, Slikok watershed project site MG12, east half of plot	50 m2 sweep net sample	8/1/2016	2016-08-01	2016-08-01	media	60.45902	-151.0769	10977509	wild caught	Arthropoda			Animalia	Ichneumoninae sp. BOLD:ACM0987	UAM-2019.02-Slikok_Creek_bioinventory-Ento	MG12
http://creativecommons.org/licenses/by/3.0/	UAMObs:Ento:240562	Vespula alascensis	Hymenoptera	Vespidae	Insecta		(same lot as) KNWR:Ento http://arctos.database.museum/guid/KNWR:Ento:10995	Mariah McInnis, Matt Bowser	12	United States	Alaska	Soldotna, in wetland 400m south-southwest of floatplane dock on Headquarters Lake, Slikok watershed project site MG12, east half of plot	50 m2 sweep net sample	8/1/2016	2016-08-01	2016-08-01	media	60.45902	-151.0769	10977509	wild caught	Arthropoda	Vespula		Animalia	Vespula alascensis	UAM-2019.02-Slikok_Creek_bioinventory-Ento	MG12
http://creativecommons.org/licenses/by/3.0/	UAMObs:Ento:240563	Chironominae sp. BOLD:ACC9013	Diptera	Chironomidae	Insecta		(same lot as) KNWR:Ento http://arctos.database.museum/guid/KNWR:Ento:10997	Mariah McInnis, Matt Bowser	12	United States	Alaska	Soldotna, muskeg 40m east of Headquarters Lake, Slikok watershed project site MG14, east half of plot	50 m2 sweep net sample	7/18/2016	2016-07-18	2016-07-18	media	60.45862	-151.05868	10977511	wild caught	Arthropoda			Animalia	Chironominae sp. BOLD:ACC9013	UAM-2019.02-Slikok_Creek_bioinventory-Ento	MG14
http://creativecommons.org/licenses/by/3.0/	UAMObs:Ento:240565	Cixius meridionalis	Hemiptera	Cixiidae	Insecta		(same lot as) KNWR:Ento http://arctos.database.museum/guid/KNWR:Ento:10997	Mariah McInnis, Matt Bowser	12	United States	Alaska	Soldotna, muskeg 40m east of Headquarters Lake, Slikok watershed project site MG14, east half of plot	50 m2 sweep net sample	7/18/2016	2016-07-18	2016-07-18	media	60.45862	-151.05868	10977511	wild caught	Arthropoda	Cixius		Animalia	Cixius meridionalis	UAM-2019.02-Slikok_Creek_bioinventory-Ento	MG14
http://creativecommons.org/licenses/by/3.0/	UAMObs:Ento:240572	Oecetis inconspicua	Trichoptera	Leptoceridae	Insecta		(same lot as) KNWR:Ento http://arctos.database.museum/guid/KNWR:Ento:10997	Mariah McInnis, Matt Bowser	12	United States	Alaska	Soldotna, muskeg 40m east of Headquarters Lake, Slikok watershed project site MG14, east half of plot	50 m2 sweep net sample	7/18/2016	2016-07-18	2016-07-18	media	60.45862	-151.05868	10977511	wild caught	Arthropoda	Oecetis		Animalia	Oecetis inconspicua	UAM-2019.02-Slikok_Creek_bioinventory-Ento	MG14
http://creativecommons.org/licenses/by/3.0/	UAMObs:Ento:240575	Protapanteles sp. BOLD:ACI4084	Hymenoptera	Braconidae	Insecta		(same lot as) KNWR:Ento http://arctos.database.museum/guid/KNWR:Ento:10997	Mariah McInnis, Matt Bowser	12	United States	Alaska	Soldotna, muskeg 40m east of Headquarters Lake, Slikok watershed project site MG14, east half of plot	50 m2 sweep net sample	7/18/2016	2016-07-18	2016-07-18	media	60.45862	-151.05868	10977511	wild caught	Arthropoda	Protapanteles		Animalia	Protapanteles sp. BOLD:ACI4084	UAM-2019.02-Slikok_Creek_bioinventory-Ento	MG14
http://creativecommons.org/licenses/by/3.0/	UAMObs:Ento:240577	Tetragnatha laboriosa	Araneae	Tetragnathidae	Arachnida		(same lot as) KNWR:Ento http://arctos.database.museum/guid/KNWR:Ento:10997	Mariah McInnis, Matt Bowser	12	United States	Alaska	Soldotna, muskeg 40m east of Headquarters Lake, Slikok watershed project site MG14, east half of plot	50 m2 sweep net sample	7/18/2016	2016-07-18	2016-07-18	media	60.45862	-151.05868	10977511	wild caught	Arthropoda	Tetragnatha		Animalia	Tetragnatha laboriosa	UAM-2019.02-Slikok_Creek_bioinventory-Ento	MG14
http://creativecommons.org/publicdomain/zero/1.0/	KNWR:Ento:11078	Bimastos rubidus	Opisthopora	Lumbricidae	Oligochaeta	BoLD barcode ID=MOBIL2189-16		Matt Bowser	5	United States	Alaska	Soldotna, 210m east-southeast of intersection of Sterling Highway and south end of Ski Hill Road, vicinity of Slikok watershed project site MG16		8/9/2016	2016-08-09	2016-08-09	whole organism	60.45506	-151.09554	11024672	wild caught	Annelida	Bimastos		Animalia	Bimastos rubidus	KNWR-2016.02-Slikok-Ento	MG16
http://creativecommons.org/publicdomain/zero/1.0/	KNWR:Ento:10948	Arthropoda				NCBI Biosample=SAMN08273440	(same lot as) UAMObs:Ento http://arctos.database.museum/guid/UAMObs:Ento:239777; (same lot as) UAMObs:Ento http://arctos.database.museum/guid/UAMObs:Ento:239778; (same lot as) UAMObs:Ento http://arctos.database.museum/guid/UAMObs:Ento:239779; (same lot as) UAMObs:Ento http://arctos.database.museum/guid/UAMObs:Ento:239780; (same lot as) UAMObs:Ento http://arctos.database.museum/guid/UAMObs:Ento:23…	Matt Bowser	12	United States	Alaska	Soldotna, Ski Hill Road, Centennial Trail north of Headquarters Lake, Slikok watershed project site MG02, east half of plot		7/19/2016	2016-07-19	2016-07-19	whole organism	60.46755	-151.05787	10977462	wild caught	Arthropoda			Animalia		KNWR-2016.02-Slikok-Ento	MG02
http://creativecommons.org/publicdomain/zero/1.0/	KNWR:Ento:10956	Arthropoda				NCBI Biosample=SAMN08273546	(same lot as) UAMObs:Ento http://arctos.database.museum/guid/UAMObs:Ento:239650; (same lot as) UAMObs:Ento http://arctos.database.museum/guid/UAMObs:Ento:239651; (same lot as) UAMObs:Ento http://arctos.database.museum/guid/UAMObs:Ento:239652; (same lot as) UAMObs:Ento http://arctos.database.museum/guid/UAMObs:Ento:239653; (same lot as) UAMObs:Ento http://arctos.database.museum/guid/UAMObs:Ento:23…	Mariah McInnis, Matt Bowser	12	United States	Alaska	Soldotna, forest 1.5km south of Headquarters Lake, Slikok watershed project site MG39, east half of plot		7/29/2016	2016-07-29	2016-07-29	whole organism	60.44076	-151.06029	10977470	wild caught	Arthropoda			Animalia		KNWR-2016.02-Slikok-Ento	MG39
http://creativecommons.org/publicdomain/zero/1.0/	KNWR:Ento:10957	Arthropoda				NCBI Biosample=SAMN08273509		Mariah McInnis, Matt Bowser	12	United States	Alaska	Soldotna, forest 1.5km south of Headquarters Lake, Slikok watershed project site MG39, west half of plot		7/29/2016	2016-07-29	2016-07-29	whole organism	60.44076	-151.06029	10977471	wild caught	Arthropoda			Animalia		KNWR-2016.02-Slikok-Ento	MG39
http://creativecommons.org/publicdomain/zero/1.0/	KNWR:Ento:10968	Arthropoda				NCBI Biosample=SAMN08273486	(same lot as) UAMObs:Ento http://arctos.database.museum/guid/UAMObs:Ento:239941; (same lot as) UAMObs:Ento http://arctos.database.museum/guid/UAMObs:Ento:239942; (same lot as) UAMObs:Ento http://arctos.database.museum/guid/UAMObs:Ento:239943; (same lot as) UAMObs:Ento http://arctos.database.museum/guid/UAMObs:Ento:239944; (same lot as) UAMObs:Ento http://arctos.database.museum/guid/UAMObs:Ento:23…	Mariah McInnis, Matt Bowser	12	United States	Alaska	Soldotna, wetland 490m south of Headquarters Lake, Slikok watershed project site SK16, east half of plot		8/3/2016	2016-08-03	2016-08-03	whole organism	60.44989	-151.06859	10977482	wild caught	Arthropoda			Animalia		KNWR-2016.02-Slikok-Ento	SK16
http://creativecommons.org/publicdomain/zero/1.0/	KNWR:Ento:10983	Arthropoda				NCBI Biosample=SAMN08273427	(same lot as) UAMObs:Ento http://arctos.database.museum/guid/UAMObs:Ento:240290; (same lot as) UAMObs:Ento http://arctos.database.museum/guid/UAMObs:Ento:240291; (same lot as) UAMObs:Ento http://arctos.database.museum/guid/UAMObs:Ento:240292; (same lot as) UAMObs:Ento http://arctos.database.museum/guid/UAMObs:Ento:240293; (same lot as) UAMObs:Ento http://arctos.database.museum/guid/UAMObs:Ento:24…	Joel Stone, Matt Bowser	12	United States	Alaska	Soldotna, Ski Hill Road, Slikok watershed project site MG05, east half of plot		7/22/2016	2016-07-22	2016-07-22	whole organism	60.46368	-151.08561	10977497	wild caught	Arthropoda			Animalia		KNWR-2016.02-Slikok-Ento	MG05
http://creativecommons.org/publicdomain/zero/1.0/	KNWR:Ento:10986	Arthropoda				NCBI Biosample=SAMN08273513	(same lot as) UAMObs:Ento http://arctos.database.museum/guid/UAMObs:Ento:240215; (same lot as) UAMObs:Ento http://arctos.database.museum/guid/UAMObs:Ento:240216; (same lot as) UAMObs:Ento http://arctos.database.museum/guid/UAMObs:Ento:240217; (same lot as) UAMObs:Ento http://arctos.database.museum/guid/UAMObs:Ento:240218; (same lot as) UAMObs:Ento http://arctos.database.museum/guid/UAMObs:Ento:24…	Matt Bowser	12	United States	Alaska	Soldotna, muskeg 120m northeast of Headquarters Lake, Slikok watershed project site MG08, east half of plot		7/22/2016	2016-07-22	2016-07-22	whole organism	60.46309	-151.05827	10977500	wild caught	Arthropoda			Animalia		KNWR-2016.02-Slikok-Ento	MG08
http://creativecommons.org/publicdomain/zero/1.0/	KNWR:Ento:10924	Arthropoda				NCBI Biosample=SAMN08273413	(same lot as) UAMObs:Ento http://arctos.database.museum/guid/UAMObs:Ento:239498; (same lot as) UAMObs:Ento http://arctos.database.museum/guid/UAMObs:Ento:239499; (same lot as) UAMObs:Ento http://arctos.database.museum/guid/UAMObs:Ento:239506; (same lot as) UAMObs:Ento http://arctos.database.museum/guid/UAMObs:Ento:239507; (same lot as) UAMObs:Ento http://arctos.database.museum/guid/UAMObs:Ento:23…	Rebekah Brassfield, Todd Eskelin	12	United States	Alaska	Soldotna, Ski Hill Road, off of Howling Hill Trail, Slikok watershed project site MG17, east half of plot		6/14/2016	2016-06-14	2016-06-14	whole organism	60.45475	-151.08641	10970717	wild caught	Arthropoda			Animalia		KNWR-2016.02-Slikok-Ento	MG17
http://creativecommons.org/publicdomain/zero/1.0/	KNWR:Ento:10925	Arthropoda				NCBI Biosample=SAMN08273535		Rebekah Brassfield, Todd Eskelin	12	United States	Alaska	Soldotna, Ski Hill Road, off of Howling Hill Trail, Slikok watershed project site MG17, west half of plot		6/14/2016	2016-06-14	2016-06-14	whole organism	60.45475	-151.08641	10970718	wild caught	Arthropoda			Animalia		KNWR-2016.02-Slikok-Ento	MG17
http://creativecommons.org/publicdomain/zero/1.0/	KNWR:Ento:10926	Arthropoda				NCBI Biosample=SAMN08273472	(same lot as) UAMObs:Ento http://arctos.database.museum/guid/UAMObs:Ento:239524; (same lot as) UAMObs:Ento http://arctos.database.museum/guid/UAMObs:Ento:239525; (same lot as) UAMObs:Ento http://arctos.database.museum/guid/UAMObs:Ento:239526; (same lot as) UAMObs:Ento http://arctos.database.museum/guid/UAMObs:Ento:239527; (same lot as) UAMObs:Ento http://arctos.database.museum/guid/UAMObs:Ento:23…	Rebekah Brassfield, Todd Eskelin	12	United States	Alaska	Soldotna, in wetland 510m southwest of Headquarters Lake, Slikok watershed project site MG18, east half of plot		6/16/2016	2016-06-16	2016-06-16	whole organism	60.45455	-151.0773	10970719	wild caught	Arthropoda			Animalia		KNWR-2016.02-Slikok-Ento	MG18
http://creativecommons.org/publicdomain/zero/1.0/	KNWR:Ento:10929	Arthropoda				NCBI Biosample=SAMN08273555		Rebekah Brassfield, Todd Eskelin	12	United States	Alaska	Soldotna, shore of southeastern bay of Headquarters Lake, Slikok watershed project site MG19, west half of plot		6/16/2016	2016-06-16	2016-06-16	whole organism	60.45435	-151.06819	10970722	wild caught	Arthropoda			Animalia		KNWR-2016.02-Slikok-Ento	MG19
http://creativecommons.org/publicdomain/zero/1.0/	KNWR:Ento:10932	Arthropoda				NCBI Biosample=SAMN08273557	(same lot as) UAMObs:Ento http://arctos.database.museum/guid/UAMObs:Ento:239453; (same lot as) UAMObs:Ento http://arctos.database.museum/guid/UAMObs:Ento:239454; (same lot as) UAMObs:Ento http://arctos.database.museum/guid/UAMObs:Ento:239456; (same lot as) UAMObs:Ento http://arctos.database.museum/guid/UAMObs:Ento:239457; (same lot as) UAMObs:Ento http://arctos.database.museum/guid/UAMObs:Ento:23…	Rebekah Brassfield, Dawn Magness	12	United States	Alaska	Soldotna, forest 720km southeast of Headquarters Lake, Slikok watershed project site MG21, east half of plot		6/15/2016	2016-06-15	2016-06-15	whole organism	60.45396	-151.04997	10970725	wild caught	Arthropoda			Animalia		KNWR-2016.02-Slikok-Ento	MG21
http://creativecommons.org/publicdomain/zero/1.0/	KNWR:Ento:10881	Arthropoda				NCBI Biosample=SAMN08273496	(same lot as) UAMObs:Ento http://arctos.database.museum/guid/UAMObs:Ento:238753; (same lot as) UAMObs:Ento http://arctos.database.museum/guid/UAMObs:Ento:238754; (same lot as) UAMObs:Ento http://arctos.database.museum/guid/UAMObs:Ento:238756; (same lot as) UAMObs:Ento http://arctos.database.museum/guid/UAMObs:Ento:238757; (same lot as) UAMObs:Ento http://arctos.database.museum/guid/UAMObs:Ento:23…	Matt Bowser, Todd Eskelin	12	United States	Alaska	Soldotna, forest 1.5km south of Headquarters Lake, Slikok watershed project site MG39, east half of plot		6/15/2016	2016-06-15	2016-06-15	whole organism	60.44076	-151.06029	10970674	wild caught	Arthropoda			Animalia		KNWR-2016.02-Slikok-Ento	MG39
http://creativecommons.org/publicdomain/zero/1.0/	KNWR:Ento:11059	Enchytraeidae sp. BOLD:ADF0980	Enchytraeida	Enchytraeidae	Clitellata	BoLD barcode ID=MOBIL2168-16		Mariah McInnis, Matt Bowser	5	United States	Alaska	Soldotna, forest 880m southeast of Nordic Lake, vicinity of Slikok watershed project site SK23		8/3/2016	2016-08-03	2016-08-03	whole organism	60.44094	-151.06929	11024687	wild caught	Annelida			Animalia	Enchytraeidae sp. BOLD:ADF0980	KNWR-2016.02-Slikok-Ento	SK23
http://creativecommons.org/publicdomain/zero/1.0/	KNWR:Ento:11034	Dendrobaena octaedra	Opisthopora	Lumbricidae	Oligochaeta			Matt Bowser	10	United States	Alaska	Soldotna, 40m east of Sterling Highway 480m northeast of intersection with south end of Ski Hill Road, vicinity of Slikok watershed project site MG10		8/10/2016	2016-08-10	2016-08-10	whole organism	60.45937	-151.09496	11024671	wild caught	Annelida	Dendrobaena		Animalia	Dendrobaena octaedra	KNWR-2016.02-Slikok-Ento	MG10
http://creativecommons.org/publicdomain/zero/1.0/	KNWR:Ento:11043	Enchytraeidae sp. BOLD:ADE9617	Enchytraeida	Enchytraeidae	Clitellata	BoLD barcode ID=MOBIL2172-16		Mariah McInnis, Matt Bowser	3	United States	Alaska	Soldotna, muskeg 600m south of Nordic Lake, vicinity of Slikok watershed project site MG37		8/3/2016	2016-08-03	2016-08-03	whole organism	60.44108	-151.07819	11024680	wild caught	Annelida			Animalia	Enchytraeidae sp. BOLD:ADE9617	KNWR-2016.02-Slikok-Ento	MG37
http://creativecommons.org/publicdomain/zero/1.0/	KNWR:Ento:11061	Bimastos rubidus	Opisthopora	Lumbricidae	Oligochaeta	BoLD barcode ID=MOBIL2169-16		Matt Bowser	7	United States	Alaska	Soldotna, Ski Hill Road, forest 840m northeast of Headquarters Lake, vicinity of Slikok watershed project site SK04		7/19/2016	2016-07-19	2016-07-19	whole organism	60.46732	-151.0486	11024683	wild caught	Annelida	Bimastos		Animalia	Bimastos rubidus	KNWR-2016.02-Slikok-Ento	SK04
http://creativecommons.org/publicdomain/zero/1.0/	KNWR:Ento:11070	Bimastos rubidus	Opisthopora	Lumbricidae	Oligochaeta	BoLD barcode ID=MOBIL2185-16		Tracy Melvin, Annie Dziergowski, Matt Bowser	5	United States	Alaska	Soldotna, forest 600m south-southeast of Headquarters Lake, vicinity of Slikok watershed project site MG26		7/20/2016	2016-07-20	2016-07-20	whole organism	60.44972	-151.05968	11024674	wild caught	Annelida	Bimastos		Animalia	Bimastos rubidus	KNWR-2016.02-Slikok-Ento	MG26
http://creativecommons.org/publicdomain/zero/1.0/	KNWR:Herb:11578	Cephaloziella divaricata	Jungermanniales	Cephaloziellaceae	Hepatopsida		(same lot as) KNWR:Herb http://arctos.database.museum/guid/KNWR:Herb:10450		20	United States	Alaska	Soldotna, 100m west of Sterling Highway and 1.3km from intersection with Funny River Road, Slikok watershed project site MG04		8/10/2016	2016-08-10	2016-08-10	whole organism	60.46387	-151.09473	10975195		Marchantiophyta	Cephaloziella		Plantae	Cephaloziella divaricata	KNWR-2016.02-Slikok-Herb	MG04
http://creativecommons.org/publicdomain/zero/1.0/	KNWR:Herb:11584	Lecidea pullata	Lecanorales	Lecideaceae	Ascomycetes		(same lot as) KNWR:Herb http://arctos.database.museum/guid/KNWR:Herb:10450		20	United States	Alaska	Soldotna, 100m west of Sterling Highway and 1.3km from intersection with Funny River Road, Slikok watershed project site MG04		8/10/2016	2016-08-10	2016-08-10	whole organism	60.46387	-151.09473	10975195		Ascomycota	Lecidea		Fungi	Lecidea pullata	KNWR-2016.02-Slikok-Herb	MG04
http://creativecommons.org/publicdomain/zero/1.0/	KNWR:Herb:11567	Dicranum fuscescens	Dicranales	Dicranaceae	Bryopsida		(same lot as) KNWR:Herb http://arctos.database.museum/guid/KNWR:Herb:10449		20	United States	Alaska	Soldotna, Ski Hill Road, Centennial Trail north of Headquarters Lake, Slikok watershed project site MG02		7/19/2016	2016-07-19	2016-07-19	whole organism	60.46755	-151.05787	10975194		Bryophyta	Dicranum		Plantae	Dicranum fuscescens	KNWR-2016.02-Slikok-Herb	MG02
http://creativecommons.org/publicdomain/zero/1.0/	KNWR:Herb:10450	Fungi or Plantae					(same lot as) KNWR:Herb http://arctos.database.museum/guid/KNWR:Herb:11576; (same lot as) KNWR:Herb http://arctos.database.museum/guid/KNWR:Herb:11577; (same lot as) KNWR:Herb http://arctos.database.museum/guid/KNWR:Herb:11578; (same lot as) KNWR:Herb http://arctos.database.museum/guid/KNWR:Herb:11579; (same lot as) KNWR:Herb http://arctos.database.museum/guid/KNWR:Herb:11580; (same lot as) KNWR:…	Matt Bowser	20	United States	Alaska	Soldotna, 100m west of Sterling Highway and 1.3km from intersection with Funny River Road, Slikok watershed project site MG04		8/10/2016	2016-08-10	2016-08-10	whole organism	60.46387	-151.09473	10975195	wild caught				Plantae, Fungi		KNWR-2016.02-Slikok-Herb	MG04
http://creativecommons.org/publicdomain/zero/1.0/	KNWR:Herb:10454	Fungi or Plantae					(same lot as) KNWR:Herb http://arctos.database.museum/guid/KNWR:Herb:11683; (same lot as) KNWR:Herb http://arctos.database.museum/guid/KNWR:Herb:11684; (same lot as) KNWR:Herb http://arctos.database.museum/guid/KNWR:Herb:11685; (same lot as) KNWR:Herb http://arctos.database.museum/guid/KNWR:Herb:11688; (same lot as) KNWR:Herb http://arctos.database.museum/guid/KNWR:Herb:11689; (same lot as) KNWR:…	Matt Bowser	20	United States	Alaska	Soldotna, muskeg 120m northeast of Headquarters Lake, Slikok watershed project site MG08		7/22/2016	2016-07-22	2016-07-22	whole organism	60.46309	-151.05827	10975199	wild caught				Plantae, Fungi		KNWR-2016.02-Slikok-Herb	MG08
http://creativecommons.org/publicdomain/zero/1.0/	KNWR:Herb:10462	Fungi or Plantae					(same lot as) KNWR:Herb http://arctos.database.museum/guid/KNWR:Herb:11907; (same lot as) KNWR:Herb http://arctos.database.museum/guid/KNWR:Herb:11908; (same lot as) KNWR:Herb http://arctos.database.museum/guid/KNWR:Herb:11909; (same lot as) KNWR:Herb http://arctos.database.museum/guid/KNWR:Herb:11910; (same lot as) KNWR:Herb http://arctos.database.museum/guid/KNWR:Herb:11911; (same lot as) KNWR:…	Matt Bowser, Mariah McInnis	20	United States	Alaska	Soldotna, shore of southeastern bay of Headquarters Lake, Slikok watershed project site MG19		8/3/2016	2016-08-03	2016-08-03	whole organism	60.45435	-151.06819	10975207	wild caught				Plantae, Fungi		KNWR-2016.02-Slikok-Herb	MG19
http://creativecommons.org/publicdomain/zero/1.0/	KNWR:Herb:10470	Fungi or Plantae					(same lot as) KNWR:Herb http://arctos.database.museum/guid/KNWR:Herb:12092; (same lot as) KNWR:Herb http://arctos.database.museum/guid/KNWR:Herb:12093; (same lot as) KNWR:Herb http://arctos.database.museum/guid/KNWR:Herb:12094; (same lot as) KNWR:Herb http://arctos.database.museum/guid/KNWR:Herb:12095; (same lot as) KNWR:Herb http://arctos.database.museum/guid/KNWR:Herb:12096; (same lot as) KNWR:…	Matt Bowser, Mariah McInnis	20	United States	Alaska	Soldotna, forest 180m south-southeast of Nordic Lake, Slikok watershed project site MG30		8/3/2016	2016-08-03	2016-08-03	whole organism	60.44562	-151.0781	10975215	wild caught				Plantae, Fungi		KNWR-2016.02-Slikok-Herb	MG30
http://creativecommons.org/publicdomain/zero/1.0/	KNWR:Herb:10471	Fungi or Plantae					(same lot as) KNWR:Herb http://arctos.database.museum/guid/KNWR:Herb:11965; (same lot as) KNWR:Herb http://arctos.database.museum/guid/KNWR:Herb:11966; (same lot as) KNWR:Herb http://arctos.database.museum/guid/KNWR:Herb:11967; (same lot as) KNWR:Herb http://arctos.database.museum/guid/KNWR:Herb:11968; (same lot as) KNWR:Herb http://arctos.database.museum/guid/KNWR:Herb:11969; (same lot as) KNWR:…	Matt Bowser, Mariah McInnis	20	United States	Alaska	Soldotna, forest 980m south of Headquarters Lake, Slikok watershed project site MG31		7/29/2016	2016-07-29	2016-07-29	whole organism	60.44542	-151.069	10975216	wild caught				Plantae, Fungi		KNWR-2016.02-Slikok-Herb	MG31
http://creativecommons.org/publicdomain/zero/1.0/	KNWR:Herb:11588	Ochrolechia androgyna		Pertusariaceae	Lecanoromycetes		(same lot as) KNWR:Herb http://arctos.database.museum/guid/KNWR:Herb:10450		20	United States	Alaska	Soldotna, 100m west of Sterling Highway and 1.3km from intersection with Funny River Road, Slikok watershed project site MG04		8/10/2016	2016-08-10	2016-08-10	whole organism	60.46387	-151.09473	10975195		Ascomycota	Ochrolechia		Fungi	Ochrolechia androgyna	KNWR-2016.02-Slikok-Herb	MG04
http://creativecommons.org/publicdomain/zero/1.0/	KNWR:Herb:11600	Cephaloziella divaricata	Jungermanniales	Cephaloziellaceae	Hepatopsida		(same lot as) KNWR:Herb http://arctos.database.museum/guid/KNWR:Herb:10451		20	United States	Alaska	Soldotna, Ski Hill Road, Slikok watershed project site MG05		7/22/2016	2016-07-22	2016-07-22	whole organism	60.46368	-151.08561	10975196		Marchantiophyta	Cephaloziella		Plantae	Cephaloziella divaricata	KNWR-2016.02-Slikok-Herb	MG05
http://creativecommons.org/publicdomain/zero/1.0/	KNWR:Herb:11803	Dicranum scoparium	Dicranales	Dicranaceae	Bryopsida		(same lot as) KNWR:Herb http://arctos.database.museum/guid/KNWR:Herb:10466		20	United States	Alaska	Soldotna, forest 120m east of Nordic Lake, Slikok watershed project site MG24		8/3/2016	2016-08-03	2016-08-03	whole organism	60.45008	-151.0777	10975211		Bryophyta	Dicranum		Plantae	Dicranum scoparium	KNWR-2016.02-Slikok-Herb	MG24
http://creativecommons.org/publicdomain/zero/1.0/	KNWR:Herb:11807	Japewia tornoensis	Lecanorales	Bacidiaceae	Lecanoromycetes		(same lot as) KNWR:Herb http://arctos.database.museum/guid/KNWR:Herb:10466		20	United States	Alaska	Soldotna, forest 120m east of Nordic Lake, Slikok watershed project site MG24		8/3/2016	2016-08-03	2016-08-03	whole organism	60.45008	-151.0777	10975211		Ascomycota	Japewia		Fungi	Japewia tornoensis	KNWR-2016.02-Slikok-Herb	MG24
http://creativecommons.org/publicdomain/zero/1.0/	KNWR:Herb:11822	Ramboldia cinnabarina	Lecanorales	Lecanoraceae	Lecanoromycetes		(same lot as) KNWR:Herb http://arctos.database.museum/guid/KNWR:Herb:10457		20	United States	Alaska	Soldotna, in wetland 400m south-southwest of floatplane dock on Headquarters Lake, Slikok watershed project site MG12		8/1/2016	2016-08-01	2016-08-01	whole organism	60.45902	-151.0769	10975202		Ascomycota	Ramboldia		Fungi	Ramboldia cinnabarina	KNWR-2016.02-Slikok-Herb	MG12
http://creativecommons.org/publicdomain/zero/1.0/	KNWR:Herb:11830	Aulacomnium palustre	Bryales	Aulacomniaceae	Bryopsida		(same lot as) KNWR:Herb http://arctos.database.museum/guid/KNWR:Herb:10458		20	United States	Alaska	Soldotna, muskeg 40m east of Headquarters Lake, Slikok watershed project site MG14		7/18/2016	2016-07-18	2016-07-18	whole organism	60.45862	-151.05868	10975203		Bryophyta	Aulacomnium		Plantae	Aulacomnium palustre	KNWR-2016.02-Slikok-Herb	MG14
http://creativecommons.org/publicdomain/zero/1.0/	KNWR:Herb:11831	Bryoria fuscescens	Lecanorales	Parmeliaceae	Lecanoromycetes		(same lot as) KNWR:Herb http://arctos.database.museum/guid/KNWR:Herb:10458		20	United States	Alaska	Soldotna, muskeg 40m east of Headquarters Lake, Slikok watershed project site MG14		7/18/2016	2016-07-18	2016-07-18	whole organism	60.45862	-151.05868	10975203		Ascomycota	Bryoria		Fungi	Bryoria fuscescens	KNWR-2016.02-Slikok-Herb	MG14
http://creativecommons.org/publicdomain/zero/1.0/	KNWR:Herb:11838	Campylium stellatum	Hypnales	Amblystegiaceae	Bryopsida		(same lot as) KNWR:Herb http://arctos.database.museum/guid/KNWR:Herb:10458		20	United States	Alaska	Soldotna, muskeg 40m east of Headquarters Lake, Slikok watershed project site MG14		7/18/2016	2016-07-18	2016-07-18	whole organism	60.45862	-151.05868	10975203		Bryophyta	Campylium		Plantae	Campylium stellatum	KNWR-2016.02-Slikok-Herb	MG14
http://creativecommons.org/publicdomain/zero/1.0/	KNWR:Herb:11849	Pohlia nutans	Bryales	Bryaceae	Bryopsida		(same lot as) KNWR:Herb http://arctos.database.museum/guid/KNWR:Herb:10458		20	United States	Alaska	Soldotna, muskeg 40m east of Headquarters Lake, Slikok watershed project site MG14		7/18/2016	2016-07-18	2016-07-18	whole organism	60.45862	-151.05868	10975203		Bryophyta	Pohlia		Plantae	Pohlia nutans	KNWR-2016.02-Slikok-Herb	MG14
http://creativecommons.org/publicdomain/zero/1.0/	KNWR:Herb:11870	Lecanora symmicta	Lecanorales	Lecanoraceae	Lecanoromycetes		(same lot as) KNWR:Herb http://arctos.database.museum/guid/KNWR:Herb:10459		20	United States	Alaska	Soldotna, 210m east-southeast of intersection of Sterling Highway and south end of Ski Hill Road, Slikok watershed project site MG16		8/9/2016	2016-08-09	2016-08-09	whole organism	60.45494	-151.09552	10975204		Ascomycota	Lecanora		Fungi	Lecanora symmicta	KNWR-2016.02-Slikok-Herb	MG16
http://creativecommons.org/publicdomain/zero/1.0/	KNWR:Herb:11876	Peltigera membranacea		Peltigeraceae	Lecanoromycetes		(same lot as) KNWR:Herb http://arctos.database.museum/guid/KNWR:Herb:10459		20	United States	Alaska	Soldotna, 210m east-southeast of intersection of Sterling Highway and south end of Ski Hill Road, Slikok watershed project site MG16		8/9/2016	2016-08-09	2016-08-09	whole organism	60.45494	-151.09552	10975204		Ascomycota	Peltigera		Fungi	Peltigera membranacea	KNWR-2016.02-Slikok-Herb	MG16
http://creativecommons.org/publicdomain/zero/1.0/	KNWR:Herb:11887	Tuckermannopsis chlorophylla	Lecanorales	Parmeliaceae	Lecanoromycetes		(same lot as) KNWR:Herb http://arctos.database.museum/guid/KNWR:Herb:10459		20	United States	Alaska	Soldotna, 210m east-southeast of intersection of Sterling Highway and south end of Ski Hill Road, Slikok watershed project site MG16		8/9/2016	2016-08-09	2016-08-09	whole organism	60.45494	-151.09552	10975204		Ascomycota	Tuckermannopsis		Fungi	Tuckermannopsis chlorophylla	KNWR-2016.02-Slikok-Herb	MG16
http://creativecommons.org/publicdomain/zero/1.0/	KNWR:Herb:11894	Lobaria scrobiculata	Peltigerales	Lobariaceae	Ascomycetes		(same lot as) KNWR:Herb http://arctos.database.museum/guid/KNWR:Herb:10460		20	United States	Alaska	Soldotna, Ski Hill Road, off of Howling Hill Trail, Slikok watershed project site MG17		8/9/2016	2016-08-09	2016-08-09	whole organism	60.45475	-151.08641	10975205		Ascomycota	Lobaria		Fungi	Lobaria scrobiculata	KNWR-2016.02-Slikok-Herb	MG17
http://creativecommons.org/publicdomain/zero/1.0/	KNWR:Herb:11897	Peltigera leucophlebia		Peltigeraceae	Lecanoromycetes		(same lot as) KNWR:Herb http://arctos.database.museum/guid/KNWR:Herb:10460		20	United States	Alaska	Soldotna, Ski Hill Road, off of Howling Hill Trail, Slikok watershed project site MG17		8/9/2016	2016-08-09	2016-08-09	whole organism	60.45475	-151.08641	10975205		Ascomycota	Peltigera		Fungi	Peltigera leucophlebia	KNWR-2016.02-Slikok-Herb	MG17
http://creativecommons.org/publicdomain/zero/1.0/	KNWR:Herb:11906	Tuckermannopsis chlorophylla	Lecanorales	Parmeliaceae	Lecanoromycetes		(same lot as) KNWR:Herb http://arctos.database.museum/guid/KNWR:Herb:10461		20	United States	Alaska	Soldotna, in wetland 510m southwest of Headquarters Lake, Slikok watershed project site MG18		8/1/2016	2016-08-01	2016-08-01	whole organism	60.45455	-151.0773	10975206		Ascomycota	Tuckermannopsis		Fungi	Tuckermannopsis chlorophylla	KNWR-2016.02-Slikok-Herb	MG18
http://creativecommons.org/publicdomain/zero/1.0/	KNWR:Herb:11766	Cetraria laevigata	Lecanorales	Parmeliaceae	Lecanoromycetes		(same lot as) KNWR:Herb http://arctos.database.museum/guid/KNWR:Herb:10465		20	United States	Alaska	Soldotna, muskeg 250m east of Arc Lake, Slikok watershed project site MG22		8/9/2016	2016-08-09	2016-08-09	whole organism	60.45048	-151.09592	10975210		Ascomycota	Cetraria		Fungi	Cetraria laevigata	KNWR-2016.02-Slikok-Herb	MG22
http://creativecommons.org/publicdomain/zero/1.0/	KNWR:Herb:11767	Cetraria sepincola	Lecanorales	Parmeliaceae	Ascomycetes		(same lot as) KNWR:Herb http://arctos.database.museum/guid/KNWR:Herb:10465		20	United States	Alaska	Soldotna, muskeg 250m east of Arc Lake, Slikok watershed project site MG22		8/9/2016	2016-08-09	2016-08-09	whole organism	60.45048	-151.09592	10975210		Ascomycota	Cetraria		Fungi	Cetraria sepincola	KNWR-2016.02-Slikok-Herb	MG22
http://creativecommons.org/publicdomain/zero/1.0/	KNWR:Herb:11768	Cladina rangiferina	Lecanorales	Cladoniaceae	Ascomycetes		(same lot as) KNWR:Herb http://arctos.database.museum/guid/KNWR:Herb:10465		20	United States	Alaska	Soldotna, muskeg 250m east of Arc Lake, Slikok watershed project site MG22		8/9/2016	2016-08-09	2016-08-09	whole organism	60.45048	-151.09592	10975210		Ascomycota	Cladina		Fungi	Cladina rangiferina	KNWR-2016.02-Slikok-Herb	MG22
http://creativecommons.org/publicdomain/zero/1.0/	KNWR:Herb:11775	Cladonia fimbriata	Lecanorales	Cladoniaceae	Lecanoromycetes		(same lot as) KNWR:Herb http://arctos.database.museum/guid/KNWR:Herb:10465		20	United States	Alaska	Soldotna, muskeg 250m east of Arc Lake, Slikok watershed project site MG22		8/9/2016	2016-08-09	2016-08-09	whole organism	60.45048	-151.09592	10975210		Ascomycota	Cladonia		Fungi	Cladonia fimbriata	KNWR-2016.02-Slikok-Herb	MG22
http://creativecommons.org/publicdomain/zero/1.0/	KNWR:Herb:11778	Hypogymnia physodes	Lecanorales	Parmeliaceae	Lecanoromycetes		(same lot as) KNWR:Herb http://arctos.database.museum/guid/KNWR:Herb:10465		20	United States	Alaska	Soldotna, muskeg 250m east of Arc Lake, Slikok watershed project site MG22		8/9/2016	2016-08-09	2016-08-09	whole organism	60.45048	-151.09592	10975210		Ascomycota	Hypogymnia		Fungi	Hypogymnia physodes	KNWR-2016.02-Slikok-Herb	MG22
http://creativecommons.org/publicdomain/zero/1.0/	KNWR:Herb:11780	Lecanora symmicta	Lecanorales	Lecanoraceae	Lecanoromycetes		(same lot as) KNWR:Herb http://arctos.database.museum/guid/KNWR:Herb:10465		20	United States	Alaska	Soldotna, muskeg 250m east of Arc Lake, Slikok watershed project site MG22		8/9/2016	2016-08-09	2016-08-09	whole organism	60.45048	-151.09592	10975210		Ascomycota	Lecanora		Fungi	Lecanora symmicta	KNWR-2016.02-Slikok-Herb	MG22
http://creativecommons.org/publicdomain/zero/1.0/	KNWR:Herb:11781	Mylia taylorii	Jungermanniales	Jungermanniaceae	Hepatopsida		(same lot as) KNWR:Herb http://arctos.database.museum/guid/KNWR:Herb:10465		20	United States	Alaska	Soldotna, muskeg 250m east of Arc Lake, Slikok watershed project site MG22		8/9/2016	2016-08-09	2016-08-09	whole organism	60.45048	-151.09592	10975210		Marchantiophyta	Mylia		Plantae	Mylia taylorii	KNWR-2016.02-Slikok-Herb	MG22
http://creativecommons.org/publicdomain/zero/1.0/	KNWR:Herb:11785	Peltigera scabrosa		Peltigeraceae	Lecanoromycetes		(same lot as) KNWR:Herb http://arctos.database.museum/guid/KNWR:Herb:10465		20	United States	Alaska	Soldotna, muskeg 250m east of Arc Lake, Slikok watershed project site MG22		8/9/2016	2016-08-09	2016-08-09	whole organism	60.45048	-151.09592	10975210		Ascomycota	Peltigera		Fungi	Peltigera scabrosa	KNWR-2016.02-Slikok-Herb	MG22
http://creativecommons.org/publicdomain/zero/1.0/	KNWR:Herb:11787	Pohlia nutans	Bryales	Bryaceae	Bryopsida		(same lot as) KNWR:Herb http://arctos.database.museum/guid/KNWR:Herb:10465		20	United States	Alaska	Soldotna, muskeg 250m east of Arc Lake, Slikok watershed project site MG22		8/9/2016	2016-08-09	2016-08-09	whole organism	60.45048	-151.09592	10975210		Bryophyta	Pohlia		Plantae	Pohlia nutans	KNWR-2016.02-Slikok-Herb	MG22
http://creativecommons.org/publicdomain/zero/1.0/	KNWR:Herb:11792	Biatora efflorescens	Lecanorales	Bacidiaceae	Ascomycetes		(same lot as) KNWR:Herb http://arctos.database.museum/guid/KNWR:Herb:10466		20	United States	Alaska	Soldotna, forest 120m east of Nordic Lake, Slikok watershed project site MG24		8/3/2016	2016-08-03	2016-08-03	whole organism	60.45008	-151.0777	10975211		Ascomycota	Biatora		Fungi	Biatora efflorescens	KNWR-2016.02-Slikok-Herb	MG24
http://creativecommons.org/publicdomain/zero/1.0/	KNWR:Herb:11800	Tritomaria exsectiformis	Jungermanniales	Jungermanniaceae	Hepatopsida		(same lot as) KNWR:Herb http://arctos.database.museum/guid/KNWR:Herb:10465		20	United States	Alaska	Soldotna, muskeg 250m east of Arc Lake, Slikok watershed project site MG22		8/9/2016	2016-08-09	2016-08-09	whole organism	60.45048	-151.09592	10975210		Marchantiophyta	Tritomaria		Plantae	Tritomaria exsectiformis	KNWR-2016.02-Slikok-Herb	MG22
http://creativecommons.org/publicdomain/zero/1.0/	KNWR:Herb:11801	Cladonia grayi	Lecanorales	Cladoniaceae	Lecanoromycetes		(same lot as) KNWR:Herb http://arctos.database.museum/guid/KNWR:Herb:10466		20	United States	Alaska	Soldotna, forest 120m east of Nordic Lake, Slikok watershed project site MG24		8/3/2016	2016-08-03	2016-08-03	whole organism	60.45008	-151.0777	10975211		Ascomycota	Cladonia		Fungi	Cladonia grayi	KNWR-2016.02-Slikok-Herb	MG24
http://creativecommons.org/publicdomain/zero/1.0/	KNWR:Herb:11802	Dicranum polysetum	Dicranales	Dicranaceae	Bryopsida		(same lot as) KNWR:Herb http://arctos.database.museum/guid/KNWR:Herb:10466		20	United States	Alaska	Soldotna, forest 120m east of Nordic Lake, Slikok watershed project site MG24		8/3/2016	2016-08-03	2016-08-03	whole organism	60.45008	-151.0777	10975211		Bryophyta	Dicranum		Plantae	Dicranum polysetum	KNWR-2016.02-Slikok-Herb	MG24
http://creativecommons.org/publicdomain/zero/1.0/	KNWR:Herb:11912	Cladina rangiferina	Lecanorales	Cladoniaceae	Ascomycetes		(same lot as) KNWR:Herb http://arctos.database.museum/guid/KNWR:Herb:10462		20	United States	Alaska	Soldotna, shore of southeastern bay of Headquarters Lake, Slikok watershed project site MG19		8/3/2016	2016-08-03	2016-08-03	whole organism	60.45435	-151.06819	10975207		Ascomycota	Cladina		Fungi	Cladina rangiferina	KNWR-2016.02-Slikok-Herb	MG19
http://creativecommons.org/publicdomain/zero/1.0/	KNWR:Herb:11940	Dicranum polysetum	Dicranales	Dicranaceae	Bryopsida		(same lot as) KNWR:Herb http://arctos.database.museum/guid/KNWR:Herb:10464		20	United States	Alaska	Soldotna, forest 720km southeast of Headquarters Lake, Slikok watershed project site MG21		7/20/2016	2016-07-20	2016-07-20	whole organism	60.45396	-151.04997	10975209		Bryophyta	Dicranum		Plantae	Dicranum polysetum	KNWR-2016.02-Slikok-Herb	MG21
http://creativecommons.org/publicdomain/zero/1.0/	KNWR:Herb:11943	Japewia tornoensis	Lecanorales	Bacidiaceae	Lecanoromycetes		(same lot as) KNWR:Herb http://arctos.database.museum/guid/KNWR:Herb:10464		20	United States	Alaska	Soldotna, forest 720km southeast of Headquarters Lake, Slikok watershed project site MG21		7/20/2016	2016-07-20	2016-07-20	whole organism	60.45396	-151.04997	10975209		Ascomycota	Japewia		Fungi	Japewia tornoensis	KNWR-2016.02-Slikok-Herb	MG21
http://creativecommons.org/publicdomain/zero/1.0/	KNWR:Herb:11671	Ptilidium pulcherrimum	Jungermanniales	Ptilidiaceae	Hepatopsida		(same lot as) KNWR:Herb http://arctos.database.museum/guid/KNWR:Herb:10456		20	United States	Alaska	Soldotna, 40m east of Sterling Highway 480m northeast of intersection with south end of Ski Hill Road, Slikok watershed project site MG10		8/10/2016	2016-08-10	2016-08-10	whole organism	60.45941	-151.09513	10975201		Marchantiophyta	Ptilidium		Plantae	Ptilidium pulcherrimum	KNWR-2016.02-Slikok-Herb	MG10
http://creativecommons.org/publicdomain/zero/1.0/	KNWR:Herb:11677	Rinodina degeliana	Lecanorales	Physciaceae	Ascomycetes		(same lot as) KNWR:Herb http://arctos.database.museum/guid/KNWR:Herb:10456		20	United States	Alaska	Soldotna, 40m east of Sterling Highway 480m northeast of intersection with south end of Ski Hill Road, Slikok watershed project site MG10		8/10/2016	2016-08-10	2016-08-10	whole organism	60.45941	-151.09513	10975201		Ascomycota	Rinodina		Fungi	Rinodina degeliana	KNWR-2016.02-Slikok-Herb	MG10
http://creativecommons.org/publicdomain/zero/1.0/	KNWR:Herb:11682	Tuckermannopsis chlorophylla	Lecanorales	Parmeliaceae	Lecanoromycetes		(same lot as) KNWR:Herb http://arctos.database.museum/guid/KNWR:Herb:10453		20	United States	Alaska	Soldotna, woods on north shore of Headquarters Lake 200m east of Keen Eye Trail floating dock, Slikok watershed project site MG07		8/1/2016	2016-08-01	2016-08-01	whole organism	60.46328	-151.06739	10975198		Ascomycota	Tuckermannopsis		Fungi	Tuckermannopsis chlorophylla	KNWR-2016.02-Slikok-Herb	MG07
http://creativecommons.org/publicdomain/zero/1.0/	KNWR:Herb:11684	Biatora pallens	Lecanorales	Bacidiaceae	Ascomycetes		(same lot as) KNWR:Herb http://arctos.database.museum/guid/KNWR:Herb:10454		20	United States	Alaska	Soldotna, muskeg 120m northeast of Headquarters Lake, Slikok watershed project site MG08		7/22/2016	2016-07-22	2016-07-22	whole organism	60.46309	-151.05827	10975199		Ascomycota	Biatora		Fungi	Biatora pallens	KNWR-2016.02-Slikok-Herb	MG08
http://creativecommons.org/publicdomain/zero/1.0/	KNWR:Herb:11689	Calypogeia sphagnicola	Jungermanniales	Calypogeiaceae	Jungermanniopsida		(same lot as) KNWR:Herb http://arctos.database.museum/guid/KNWR:Herb:10454		20	United States	Alaska	Soldotna, muskeg 120m northeast of Headquarters Lake, Slikok watershed project site MG08		7/22/2016	2016-07-22	2016-07-22	whole organism	60.46309	-151.05827	10975199		Marchantiophyta	Calypogeia		Plantae	Calypogeia sphagnicola	KNWR-2016.02-Slikok-Herb	MG08
http://creativecommons.org/publicdomain/zero/1.0/	KNWR:Herb:11704	Hylocomium splendens	Hypnales	Hylocomiaceae	Bryopsida		(same lot as) KNWR:Herb http://arctos.database.museum/guid/KNWR:Herb:10454		20	United States	Alaska	Soldotna, muskeg 120m northeast of Headquarters Lake, Slikok watershed project site MG08		7/22/2016	2016-07-22	2016-07-22	whole organism	60.46309	-151.05827	10975199		Bryophyta	Hylocomium		Plantae	Hylocomium splendens	KNWR-2016.02-Slikok-Herb	MG08
http://creativecommons.org/publicdomain/zero/1.0/	KNWR:Herb:11710	Lecidea betulicola	Lecanorales	Lecideaceae			(same lot as) KNWR:Herb http://arctos.database.museum/guid/KNWR:Herb:10454		20	United States	Alaska	Soldotna, muskeg 120m northeast of Headquarters Lake, Slikok watershed project site MG08		7/22/2016	2016-07-22	2016-07-22	whole organism	60.46309	-151.05827	10975199		Ascomycota	Lecidea		Fungi	Lecidea betulicola	KNWR-2016.02-Slikok-Herb	MG08
http://creativecommons.org/publicdomain/zero/1.0/	KNWR:Herb:11711	Lecidea pullata	Lecanorales	Lecideaceae	Ascomycetes		(same lot as) KNWR:Herb http://arctos.database.museum/guid/KNWR:Herb:10454		20	United States	Alaska	Soldotna, muskeg 120m northeast of Headquarters Lake, Slikok watershed project site MG08		7/22/2016	2016-07-22	2016-07-22	whole organism	60.46309	-151.05827	10975199		Ascomycota	Lecidea		Fungi	Lecidea pullata	KNWR-2016.02-Slikok-Herb	MG08
http://creativecommons.org/publicdomain/zero/1.0/	KNWR:Herb:11717	Peltigera scabrosa		Peltigeraceae	Lecanoromycetes		(same lot as) KNWR:Herb http://arctos.database.museum/guid/KNWR:Herb:10454		20	United States	Alaska	Soldotna, muskeg 120m northeast of Headquarters Lake, Slikok watershed project site MG08		7/22/2016	2016-07-22	2016-07-22	whole organism	60.46309	-151.05827	10975199		Ascomycota	Peltigera		Fungi	Peltigera scabrosa	KNWR-2016.02-Slikok-Herb	MG08
http://creativecommons.org/publicdomain/zero/1.0/	KNWR:Herb:11718	Physcia dubia	Lecanorales	Physciaceae	Lecanoromycetes		(same lot as) KNWR:Herb http://arctos.database.museum/guid/KNWR:Herb:10454		20	United States	Alaska	Soldotna, muskeg 120m northeast of Headquarters Lake, Slikok watershed project site MG08		7/22/2016	2016-07-22	2016-07-22	whole organism	60.46309	-151.05827	10975199		Ascomycota	Physcia		Fungi	Physcia dubia	KNWR-2016.02-Slikok-Herb	MG08
http://creativecommons.org/publicdomain/zero/1.0/	KNWR:Herb:11723	Rimularia caeca	Lecanorales	Rimulariaceae	Ascomycetes		(same lot as) KNWR:Herb http://arctos.database.museum/guid/KNWR:Herb:10454		20	United States	Alaska	Soldotna, muskeg 120m northeast of Headquarters Lake, Slikok watershed project site MG08		7/22/2016	2016-07-22	2016-07-22	whole organism	60.46309	-151.05827	10975199		Ascomycota	Rimularia		Fungi	Rimularia caeca	KNWR-2016.02-Slikok-Herb	MG08
http://creativecommons.org/publicdomain/zero/1.0/	KNWR:Herb:11730	Sphagnum papillosum	Sphagnales	Sphagnaceae	Sphagnopsida		(same lot as) KNWR:Herb http://arctos.database.museum/guid/KNWR:Herb:10454		20	United States	Alaska	Soldotna, muskeg 120m northeast of Headquarters Lake, Slikok watershed project site MG08		7/22/2016	2016-07-22	2016-07-22	whole organism	60.46309	-151.05827	10975199		Bryophyta	Sphagnum		Plantae	Sphagnum papillosum	KNWR-2016.02-Slikok-Herb	MG08
http://creativecommons.org/publicdomain/zero/1.0/	KNWR:Herb:11731	Xanthoria candelaria		Teloschistaceae	Lecanoromycetes		(same lot as) KNWR:Herb http://arctos.database.museum/guid/KNWR:Herb:10454		20	United States	Alaska	Soldotna, muskeg 120m northeast of Headquarters Lake, Slikok watershed project site MG08		7/22/2016	2016-07-22	2016-07-22	whole organism	60.46309	-151.05827	10975199		Ascomycota	Xanthoria		Fungi	Xanthoria candelaria	KNWR-2016.02-Slikok-Herb	MG08
http://creativecommons.org/publicdomain/zero/1.0/	KNWR:Herb:11749	Cladonia botrytes	Lecanorales	Cladoniaceae	Lecanoromycetes		(same lot as) KNWR:Herb http://arctos.database.museum/guid/KNWR:Herb:10456		20	United States	Alaska	Soldotna, 40m east of Sterling Highway 480m northeast of intersection with south end of Ski Hill Road, Slikok watershed project site MG10		8/10/2016	2016-08-10	2016-08-10	whole organism	60.45941	-151.09513	10975201		Ascomycota	Cladonia		Fungi	Cladonia botrytes	KNWR-2016.02-Slikok-Herb	MG10
http://creativecommons.org/publicdomain/zero/1.0/	KNWR:Herb:11751	Cladonia coniocraea	Lecanorales	Cladoniaceae	Lecanoromycetes		(same lot as) KNWR:Herb http://arctos.database.museum/guid/KNWR:Herb:10456		20	United States	Alaska	Soldotna, 40m east of Sterling Highway 480m northeast of intersection with south end of Ski Hill Road, Slikok watershed project site MG10		8/10/2016	2016-08-10	2016-08-10	whole organism	60.45941	-151.09513	10975201		Ascomycota	Cladonia		Fungi	Cladonia coniocraea	KNWR-2016.02-Slikok-Herb	MG10
http://creativecommons.org/publicdomain/zero/1.0/	KNWR:Herb:11752	Cladonia cornuta	Lecanorales	Cladoniaceae	Lecanoromycetes		(same lot as) KNWR:Herb http://arctos.database.museum/guid/KNWR:Herb:10456		20	United States	Alaska	Soldotna, 40m east of Sterling Highway 480m northeast of intersection with south end of Ski Hill Road, Slikok watershed project site MG10		8/10/2016	2016-08-10	2016-08-10	whole organism	60.45941	-151.09513	10975201		Ascomycota	Cladonia		Fungi	Cladonia cornuta	KNWR-2016.02-Slikok-Herb	MG10
http://creativecommons.org/publicdomain/zero/1.0/	KNWR:Herb:11969	Ptilidium pulcherrimum	Jungermanniales	Ptilidiaceae	Hepatopsida		(same lot as) KNWR:Herb http://arctos.database.museum/guid/KNWR:Herb:10471		20	United States	Alaska	Soldotna, forest 980m south of Headquarters Lake, Slikok watershed project site MG31		7/29/2016	2016-07-29	2016-07-29	whole organism	60.44542	-151.069	10975216		Marchantiophyta	Ptilidium		Plantae	Ptilidium pulcherrimum	KNWR-2016.02-Slikok-Herb	MG31
http://creativecommons.org/publicdomain/zero/1.0/	KNWR:Herb:11971	Sanionia uncinata	Hypnales	Amblystegiaceae	Bryopsida		(same lot as) KNWR:Herb http://arctos.database.museum/guid/KNWR:Herb:10471		20	United States	Alaska	Soldotna, forest 980m south of Headquarters Lake, Slikok watershed project site MG31		7/29/2016	2016-07-29	2016-07-29	whole organism	60.44542	-151.069	10975216		Bryophyta	Sanionia		Plantae	Sanionia uncinata	KNWR-2016.02-Slikok-Herb	MG31
http://creativecommons.org/publicdomain/zero/1.0/	KNWR:Herb:11988	Pylaisia polyantha	Hypnales	Hypnaceae	Bryopsida		(same lot as) KNWR:Herb http://arctos.database.museum/guid/KNWR:Herb:10472		20	United States	Alaska	Soldotna, forest 1km south of Headquarters Lake, Slikok watershed project site MG32		7/29/2016	2016-07-29	2016-07-29	whole organism	60.44522	-151.05989	10975217		Bryophyta	Pylaisia		Plantae	Pylaisia polyantha	KNWR-2016.02-Slikok-Herb	MG32
http://creativecommons.org/publicdomain/zero/1.0/	KNWR:Herb:11992	Xanthoria candelaria		Teloschistaceae	Lecanoromycetes		(same lot as) KNWR:Herb http://arctos.database.museum/guid/KNWR:Herb:10472		20	United States	Alaska	Soldotna, forest 1km south of Headquarters Lake, Slikok watershed project site MG32		7/29/2016	2016-07-29	2016-07-29	whole organism	60.44522	-151.05989	10975217		Ascomycota	Xanthoria		Fungi	Xanthoria candelaria	KNWR-2016.02-Slikok-Herb	MG32
http://creativecommons.org/publicdomain/zero/1.0/	KNWR:Herb:11999	Dicranum polysetum	Dicranales	Dicranaceae	Bryopsida		(same lot as) KNWR:Herb http://arctos.database.museum/guid/KNWR:Herb:10473		20	United States	Alaska	Soldotna, forest 1.3km southeast of Headquarters Lake, Slikok watershed project site MG33		7/21/2016	2016-07-21	2016-07-21	whole organism	60.44502	-151.05078	10975218		Bryophyta	Dicranum		Plantae	Dicranum polysetum	KNWR-2016.02-Slikok-Herb	MG33
http://creativecommons.org/publicdomain/zero/1.0/	KNWR:Herb:12004	Mycoblastus sanguinarius	Lecanorales	Mycoblastaceae	Lecanoromycetes		(same lot as) KNWR:Herb http://arctos.database.museum/guid/KNWR:Herb:10474		20	United States	Alaska	Soldotna, forest 1.6km southeast of Headquarters Lake, Slikok watershed project site MG34		7/21/2016	2016-07-21	2016-07-21	whole organism	60.44483	-151.04167	10975219		Ascomycota	Mycoblastus		Fungi	Mycoblastus sanguinarius	KNWR-2016.02-Slikok-Herb	MG34
http://creativecommons.org/publicdomain/zero/1.0/	KNWR:Herb:12005	Parmelia sulcata	Lecanorales	Parmeliaceae	Lecanoromycetes		(same lot as) KNWR:Herb http://arctos.database.museum/guid/KNWR:Herb:10474		20	United States	Alaska	Soldotna, forest 1.6km southeast of Headquarters Lake, Slikok watershed project site MG34		7/21/2016	2016-07-21	2016-07-21	whole organism	60.44483	-151.04167	10975219		Ascomycota	Parmelia		Fungi	Parmelia sulcata	KNWR-2016.02-Slikok-Herb	MG34
http://creativecommons.org/publicdomain/zero/1.0/	KNWR:Herb:12013	Sanionia uncinata	Hypnales	Amblystegiaceae	Bryopsida		(same lot as) KNWR:Herb http://arctos.database.museum/guid/KNWR:Herb:10474		20	United States	Alaska	Soldotna, forest 1.6km southeast of Headquarters Lake, Slikok watershed project site MG34		7/21/2016	2016-07-21	2016-07-21	whole organism	60.44483	-151.04167	10975219		Bryophyta	Sanionia		Plantae	Sanionia uncinata	KNWR-2016.02-Slikok-Herb	MG34
http://creativecommons.org/publicdomain/zero/1.0/	KNWR:Herb:12020	Cladonia coniocraea	Lecanorales	Cladoniaceae	Lecanoromycetes		(same lot as) KNWR:Herb http://arctos.database.museum/guid/KNWR:Herb:10475		20	United States	Alaska	Soldotna, forest between Raven Ridge Trail and Central Peninsula landfill, Slikok watershed project site MG35		7/26/2016	2016-07-26	2016-07-26	whole organism	60.44154	-151.09672	10975220		Ascomycota	Cladonia		Fungi	Cladonia coniocraea	KNWR-2016.02-Slikok-Herb	MG35
http://creativecommons.org/publicdomain/zero/1.0/	KNWR:Herb:12038	Hypogymnia physodes	Lecanorales	Parmeliaceae	Lecanoromycetes		(same lot as) KNWR:Herb http://arctos.database.museum/guid/KNWR:Herb:10467		20	United States	Alaska	Soldotna, forest 600m south-southeast of Headquarters Lake, Slikok watershed project site MG26		7/20/2016	2016-07-20	2016-07-20	whole organism	60.44969	-151.05948	10975212		Ascomycota	Hypogymnia		Fungi	Hypogymnia physodes	KNWR-2016.02-Slikok-Herb	MG26
http://creativecommons.org/publicdomain/zero/1.0/	KNWR:Herb:12043	Pleurozium schreberi	Hypnales	Hylocomiaceae	Bryopsida		(same lot as) KNWR:Herb http://arctos.database.museum/guid/KNWR:Herb:10467		20	United States	Alaska	Soldotna, forest 600m south-southeast of Headquarters Lake, Slikok watershed project site MG26		7/20/2016	2016-07-20	2016-07-20	whole organism	60.44969	-151.05948	10975212		Bryophyta	Pleurozium		Plantae	Pleurozium schreberi	KNWR-2016.02-Slikok-Herb	MG26
http://creativecommons.org/publicdomain/zero/1.0/	KNWR:Herb:12045	Ramalina thrausta	Lecanorales	Ramalinaceae	Lecanoromycetes		(same lot as) KNWR:Herb http://arctos.database.museum/guid/KNWR:Herb:10467		20	United States	Alaska	Soldotna, forest 600m south-southeast of Headquarters Lake, Slikok watershed project site MG26		7/20/2016	2016-07-20	2016-07-20	whole organism	60.44969	-151.05948	10975212		Ascomycota	Ramalina		Fungi	Ramalina thrausta	KNWR-2016.02-Slikok-Herb	MG26
http://creativecommons.org/publicdomain/zero/1.0/	KNWR:Herb:12067	Bryoria inactiva	Lecanorales	Parmeliaceae	Lecanoromycetes		(same lot as) KNWR:Herb http://arctos.database.museum/guid/KNWR:Herb:10469		20	United States	Alaska	Soldotna, forest 180m southwest of Nordic Lake, Slikok watershed project site MG29		8/9/2016	2016-08-09	2016-08-09	whole organism	60.44581	-151.08721	10975214		Ascomycota	Bryoria		Fungi	Bryoria inactiva	KNWR-2016.02-Slikok-Herb	MG29
http://creativecommons.org/publicdomain/zero/1.0/	KNWR:Herb:12104	Polytrichum commune	Polytrichales	Polytrichaceae	Bryopsida		(same lot as) KNWR:Herb http://arctos.database.museum/guid/KNWR:Herb:10470		20	United States	Alaska	Soldotna, forest 180m south-southeast of Nordic Lake, Slikok watershed project site MG30		8/3/2016	2016-08-03	2016-08-03	whole organism	60.44562	-151.0781	10975215		Bryophyta	Polytrichum		Plantae	Polytrichum commune	KNWR-2016.02-Slikok-Herb	MG30
http://creativecommons.org/publicdomain/zero/1.0/	KNWR:Herb:12116	Cladonia gracilis subsp. turbinata	Lecanorales	Cladoniaceae	Ascomycetes		(same lot as) KNWR:Herb http://arctos.database.museum/guid/KNWR:Herb:10471		20	United States	Alaska	Soldotna, forest 980m south of Headquarters Lake, Slikok watershed project site MG31		7/29/2016	2016-07-29	2016-07-29	whole organism	60.44542	-151.069	10975216		Ascomycota	Cladonia		Fungi	Cladonia gracilis	KNWR-2016.02-Slikok-Herb	MG31
http://creativecommons.org/publicdomain/zero/1.0/	KNWR:Herb:12122	Peltigera aphthosa		Peltigeraceae	Lecanoromycetes		(same lot as) KNWR:Herb http://arctos.database.museum/guid/KNWR:Herb:10471		20	United States	Alaska	Soldotna, forest 980m south of Headquarters Lake, Slikok watershed project site MG31		7/29/2016	2016-07-29	2016-07-29	whole organism	60.44542	-151.069	10975216		Ascomycota	Peltigera		Fungi	Peltigera aphthosa	KNWR-2016.02-Slikok-Herb	MG31
http://creativecommons.org/publicdomain/zero/1.0/	KNWR:Herb:12135	Cladonia cornuta	Lecanorales	Cladoniaceae	Lecanoromycetes		(same lot as) KNWR:Herb http://arctos.database.museum/guid/KNWR:Herb:10486		20	United States	Alaska	Soldotna, forest 880m southeast of Nordic Lake, Slikok watershed project site SK23		8/3/2016	2016-08-03	2016-08-03	whole organism	60.44095	-151.0694	10975231		Ascomycota	Cladonia		Fungi	Cladonia cornuta	KNWR-2016.02-Slikok-Herb	SK23
http://creativecommons.org/publicdomain/zero/1.0/	KNWR:Herb:12141	Hypogymnia physodes	Lecanorales	Parmeliaceae	Lecanoromycetes		(same lot as) KNWR:Herb http://arctos.database.museum/guid/KNWR:Herb:10486		20	United States	Alaska	Soldotna, forest 880m southeast of Nordic Lake, Slikok watershed project site SK23		8/3/2016	2016-08-03	2016-08-03	whole organism	60.44095	-151.0694	10975231		Ascomycota	Hypogymnia		Fungi	Hypogymnia physodes	KNWR-2016.02-Slikok-Herb	SK23
http://creativecommons.org/publicdomain/zero/1.0/	KNWR:Herb:12147	Lobaria pulmonaria			Lecanoromycetes		(same lot as) KNWR:Herb http://arctos.database.museum/guid/KNWR:Herb:10486		20	United States	Alaska	Soldotna, forest 880m southeast of Nordic Lake, Slikok watershed project site SK23		8/3/2016	2016-08-03	2016-08-03	whole organism	60.44095	-151.0694	10975231		Ascomycota	Lobaria		Fungi	Lobaria pulmonaria	KNWR-2016.02-Slikok-Herb	SK23
http://creativecommons.org/publicdomain/zero/1.0/	KNWR:Herb:12166	Bryoria fuscescens	Lecanorales	Parmeliaceae	Lecanoromycetes		(same lot as) KNWR:Herb http://arctos.database.museum/guid/KNWR:Herb:10476		20	United States	Alaska	Soldotna, muskeg 600m south of Nordic Lake, Slikok watershed project site MG37		8/3/2016	2016-08-03	2016-08-03	whole organism	60.44115	-151.07851	10975221		Ascomycota	Bryoria		Fungi	Bryoria fuscescens	KNWR-2016.02-Slikok-Herb	MG37
http://creativecommons.org/publicdomain/zero/1.0/	KNWR:Herb:12167	Bryoria pseudofuscescens	Lecanorales	Parmeliaceae	Lecanoromycetes		(same lot as) KNWR:Herb http://arctos.database.museum/guid/KNWR:Herb:10476		20	United States	Alaska	Soldotna, muskeg 600m south of Nordic Lake, Slikok watershed project site MG37		8/3/2016	2016-08-03	2016-08-03	whole organism	60.44115	-151.07851	10975221		Ascomycota	Bryoria		Fungi	Bryoria pseudofuscescens	KNWR-2016.02-Slikok-Herb	MG37
http://creativecommons.org/publicdomain/zero/1.0/	KNWR:Herb:12172	Parmelia sulcata	Lecanorales	Parmeliaceae	Lecanoromycetes		(same lot as) KNWR:Herb http://arctos.database.museum/guid/KNWR:Herb:10476		20	United States	Alaska	Soldotna, muskeg 600m south of Nordic Lake, Slikok watershed project site MG37		8/3/2016	2016-08-03	2016-08-03	whole organism	60.44115	-151.07851	10975221		Ascomycota	Parmelia		Fungi	Parmelia sulcata	KNWR-2016.02-Slikok-Herb	MG37
http://creativecommons.org/publicdomain/zero/1.0/	KNWR:Herb:12173	Tomentypnum nitens	Hypnales	Brachytheciaceae	Bryopsida		(same lot as) KNWR:Herb http://arctos.database.museum/guid/KNWR:Herb:10476		20	United States	Alaska	Soldotna, muskeg 600m south of Nordic Lake, Slikok watershed project site MG37		8/3/2016	2016-08-03	2016-08-03	whole organism	60.44115	-151.07851	10975221		Bryophyta	Tomentypnum		Plantae	Tomentypnum nitens	KNWR-2016.02-Slikok-Herb	MG37
http://creativecommons.org/publicdomain/zero/1.0/	KNWR:Herb:12180	Cladina rangiferina	Lecanorales	Cladoniaceae	Ascomycetes		(same lot as) KNWR:Herb http://arctos.database.museum/guid/KNWR:Herb:10477		20	United States	Alaska	Soldotna, forest 1.5km south of Headquarters Lake, Slikok watershed project site MG39		7/29/2016	2016-07-29	2016-07-29	whole organism	60.44076	-151.06029	10975222		Ascomycota	Cladina		Fungi	Cladina rangiferina	KNWR-2016.02-Slikok-Herb	MG39
http://creativecommons.org/publicdomain/zero/1.0/	KNWR:Herb:12181	Sphagnum angustifolium	Sphagnales	Sphagnaceae	Sphagnopsida		(same lot as) KNWR:Herb http://arctos.database.museum/guid/KNWR:Herb:10476		20	United States	Alaska	Soldotna, muskeg 600m south of Nordic Lake, Slikok watershed project site MG37		8/3/2016	2016-08-03	2016-08-03	whole organism	60.44115	-151.07851	10975221		Bryophyta	Sphagnum		Plantae	Sphagnum angustifolium	KNWR-2016.02-Slikok-Herb	MG37
http://creativecommons.org/publicdomain/zero/1.0/	KNWR:Herb:12183	Cladina stygia	Lecanorales	Cladoniaceae	Ascomycetes		(same lot as) KNWR:Herb http://arctos.database.museum/guid/KNWR:Herb:10477		20	United States	Alaska	Soldotna, forest 1.5km south of Headquarters Lake, Slikok watershed project site MG39		7/29/2016	2016-07-29	2016-07-29	whole organism	60.44076	-151.06029	10975222		Ascomycota	Cladina		Fungi	Cladina stygia	KNWR-2016.02-Slikok-Herb	MG39
http://creativecommons.org/publicdomain/zero/1.0/	KNWR:Herb:12185	Cladonia crispata	Lecanorales	Cladoniaceae	Lecanoromycetes		(same lot as) KNWR:Herb http://arctos.database.museum/guid/KNWR:Herb:10477		20	United States	Alaska	Soldotna, forest 1.5km south of Headquarters Lake, Slikok watershed project site MG39		7/29/2016	2016-07-29	2016-07-29	whole organism	60.44076	-151.06029	10975222		Ascomycota	Cladonia		Fungi	Cladonia crispata	KNWR-2016.02-Slikok-Herb	MG39
http://creativecommons.org/publicdomain/zero/1.0/	KNWR:Herb:12198	Sphagnum fuscum	Sphagnales	Sphagnaceae	Sphagnopsida		(same lot as) KNWR:Herb http://arctos.database.museum/guid/KNWR:Herb:10477		20	United States	Alaska	Soldotna, forest 1.5km south of Headquarters Lake, Slikok watershed project site MG39		7/29/2016	2016-07-29	2016-07-29	whole organism	60.44076	-151.06029	10975222		Bryophyta	Sphagnum		Plantae	Sphagnum fuscum	KNWR-2016.02-Slikok-Herb	MG39
http://creativecommons.org/publicdomain/zero/1.0/	KNWR:Herb:11642	Ptilidium pulcherrimum	Jungermanniales	Ptilidiaceae	Hepatopsida		(same lot as) KNWR:Herb http://arctos.database.museum/guid/KNWR:Herb:10452		20	United States	Alaska	Soldotna, Ski Hill Road, ski trails between new visitor center and old septic leach field, Slikok watershed project site MG06		8/10/2016	2016-08-10	2016-08-10	whole organism	60.46348	-151.0765	10975197		Marchantiophyta	Ptilidium		Plantae	Ptilidium pulcherrimum	KNWR-2016.02-Slikok-Herb	MG06
http://creativecommons.org/publicdomain/zero/1.0/	KNWR:Herb:11650	Aulacomnium palustre	Bryales	Aulacomniaceae	Bryopsida		(same lot as) KNWR:Herb http://arctos.database.museum/guid/KNWR:Herb:10453		20	United States	Alaska	Soldotna, woods on north shore of Headquarters Lake 200m east of Keen Eye Trail floating dock, Slikok watershed project site MG07		8/1/2016	2016-08-01	2016-08-01	whole organism	60.46328	-151.06739	10975198		Bryophyta	Aulacomnium		Plantae	Aulacomnium palustre	KNWR-2016.02-Slikok-Herb	MG07
http://creativecommons.org/publicdomain/zero/1.0/	KNWR:Herb:11655	Cladonia elongata	Lecanorales	Cladoniaceae	Ascomycetes		(same lot as) KNWR:Herb http://arctos.database.museum/guid/KNWR:Herb:10453		20	United States	Alaska	Soldotna, woods on north shore of Headquarters Lake 200m east of Keen Eye Trail floating dock, Slikok watershed project site MG07		8/1/2016	2016-08-01	2016-08-01	whole organism	60.46328	-151.06739	10975198		Ascomycota	Cladonia		Fungi	Cladonia elongata	KNWR-2016.02-Slikok-Herb	MG07
http://creativecommons.org/publicdomain/zero/1.0/	KNWR:Herb:11661	Bryoria lanestris	Lecanorales	Parmeliaceae	Lecanoromycetes		(same lot as) KNWR:Herb http://arctos.database.museum/guid/KNWR:Herb:10453		20	United States	Alaska	Soldotna, woods on north shore of Headquarters Lake 200m east of Keen Eye Trail floating dock, Slikok watershed project site MG07		8/1/2016	2016-08-01	2016-08-01	whole organism	60.46328	-151.06739	10975198		Ascomycota	Bryoria		Fungi	Bryoria lanestris	KNWR-2016.02-Slikok-Herb	MG07
http://creativecommons.org/publicdomain/zero/1.0/	KNWR:Herb:12204	Cladonia ochrochlora	Lecanorales	Cladoniaceae	Lecanoromycetes		(same lot as) KNWR:Herb http://arctos.database.museum/guid/KNWR:Herb:10478		20	United States	Alaska	Soldotna, forest 2km southeast of Headquarters Lake, Slikok watershed project site MG41		7/21/2016	2016-07-21	2016-07-21	whole organism	60.44036	-151.04208	10975223		Ascomycota	Cladonia		Fungi	Cladonia ochrochlora	KNWR-2016.02-Slikok-Herb	MG41
http://creativecommons.org/publicdomain/zero/1.0/	KNWR:Herb:12209	Leptogium compactum	Lecanorales	Collemataceae	Ascomycetes		(same lot as) KNWR:Herb http://arctos.database.museum/guid/KNWR:Herb:10478		20	United States	Alaska	Soldotna, forest 2km southeast of Headquarters Lake, Slikok watershed project site MG41		7/21/2016	2016-07-21	2016-07-21	whole organism	60.44036	-151.04208	10975223		Ascomycota	Leptogium		Fungi	Leptogium compactum	KNWR-2016.02-Slikok-Herb	MG41
http://creativecommons.org/publicdomain/zero/1.0/	KNWR:Herb:12210	Lobaria scrobiculata	Peltigerales	Lobariaceae	Ascomycetes		(same lot as) KNWR:Herb http://arctos.database.museum/guid/KNWR:Herb:10478		20	United States	Alaska	Soldotna, forest 2km southeast of Headquarters Lake, Slikok watershed project site MG41		7/21/2016	2016-07-21	2016-07-21	whole organism	60.44036	-151.04208	10975223		Ascomycota	Lobaria		Fungi	Lobaria scrobiculata	KNWR-2016.02-Slikok-Herb	MG41
http://creativecommons.org/publicdomain/zero/1.0/	KNWR:Herb:12213	Peltigera praetextata		Peltigeraceae	Lecanoromycetes		(same lot as) KNWR:Herb http://arctos.database.museum/guid/KNWR:Herb:10478		20	United States	Alaska	Soldotna, forest 2km southeast of Headquarters Lake, Slikok watershed project site MG41		7/21/2016	2016-07-21	2016-07-21	whole organism	60.44036	-151.04208	10975223		Ascomycota	Peltigera		Fungi	Peltigera praetextata	KNWR-2016.02-Slikok-Herb	MG41
http://creativecommons.org/publicdomain/zero/1.0/	KNWR:Herb:12215	Ptilium crista-castrensis	Hypnales	Ptiliidae	Bryopsida		(same lot as) KNWR:Herb http://arctos.database.museum/guid/KNWR:Herb:10478		20	United States	Alaska	Soldotna, forest 2km southeast of Headquarters Lake, Slikok watershed project site MG41		7/21/2016	2016-07-21	2016-07-21	whole organism	60.44036	-151.04208	10975223		Bryophyta	Ptilium		Plantae	Ptilium crista-castrensis	KNWR-2016.02-Slikok-Herb	MG41
http://creativecommons.org/publicdomain/zero/1.0/	KNWR:Herb:12219	Calicium viride	Caliciales	Caliciaceae	Ascomycetes		(same lot as) KNWR:Herb http://arctos.database.museum/guid/KNWR:Herb:10479		20	United States	Alaska	Soldotna, Ski Hill Road, off of Centennial Trail 480m northeast of Kenai National Wildlife Refuge headquarters building, Slikok watershed project site SK03		7/19/2016	2016-07-19	2016-07-19	whole organism	60.46775	-151.06698	10975224		Ascomycota	Calicium		Fungi	Calicium viride	KNWR-2016.02-Slikok-Herb	SK03
http://creativecommons.org/publicdomain/zero/1.0/	KNWR:Herb:12224	Hypnum circinale	Hypnales	Hypnaceae	Bryopsida		(same lot as) KNWR:Herb http://arctos.database.museum/guid/KNWR:Herb:10479		20	United States	Alaska	Soldotna, Ski Hill Road, off of Centennial Trail 480m northeast of Kenai National Wildlife Refuge headquarters building, Slikok watershed project site SK03		7/19/2016	2016-07-19	2016-07-19	whole organism	60.46775	-151.06698	10975224		Bryophyta	Hypnum		Plantae	Hypnum circinale	KNWR-2016.02-Slikok-Herb	SK03
http://creativecommons.org/publicdomain/zero/1.0/	KNWR:Herb:12245	Dicranum fuscescens	Dicranales	Dicranaceae	Bryopsida		(same lot as) KNWR:Herb http://arctos.database.museum/guid/KNWR:Herb:10481		20	United States	Alaska	Soldotna, Ski Hill Road, Slikok watershed project site SK08		7/22/2016	2016-07-22	2016-07-22	whole organism	60.45921	-151.08601	10975226		Bryophyta	Dicranum		Plantae	Dicranum fuscescens	KNWR-2016.02-Slikok-Herb	SK08
http://creativecommons.org/publicdomain/zero/1.0/	KNWR:Herb:12263	Sanionia uncinata	Hypnales	Amblystegiaceae	Bryopsida		(same lot as) KNWR:Herb http://arctos.database.museum/guid/KNWR:Herb:10481		20	United States	Alaska	Soldotna, Ski Hill Road, Slikok watershed project site SK08		7/22/2016	2016-07-22	2016-07-22	whole organism	60.45921	-151.08601	10975226		Bryophyta	Sanionia		Plantae	Sanionia uncinata	KNWR-2016.02-Slikok-Herb	SK08
http://creativecommons.org/publicdomain/zero/1.0/	KNWR:Herb:12294	Parmelia sulcata	Lecanorales	Parmeliaceae	Lecanoromycetes		(same lot as) KNWR:Herb http://arctos.database.museum/guid/KNWR:Herb:10484		20	United States	Alaska	Soldotna, forest 940m southeast of Headquarters Lake, Slikok watershed project site SK17		7/20/2016	2016-07-20	2016-07-20	whole organism	60.44949	-151.05037	10975229		Ascomycota	Parmelia		Fungi	Parmelia sulcata	KNWR-2016.02-Slikok-Herb	SK17
http://creativecommons.org/publicdomain/zero/1.0/	KNWR:Herb:12327	Rhizomnium glabrescens	Bryales	Mniaceae	Bryopsida		(same lot as) KNWR:Herb http://arctos.database.museum/guid/KNWR:Herb:10487		20	United States	Alaska	Soldotna, stream 1.7km south-southeast of Headquarters Lake, Slikok watershed project site SK24		7/29/2016	2016-07-29	2016-07-29	whole organism	60.44056	-151.05118	10975232		Bryophyta	Rhizomnium		Plantae	Rhizomnium glabrescens	KNWR-2016.02-Slikok-Herb	SK24
http://creativecommons.org/publicdomain/zero/1.0/	KNWR:Herb:12329	Bryoria fuscescens	Lecanorales	Parmeliaceae	Lecanoromycetes		(same lot as) KNWR:Herb http://arctos.database.museum/guid/KNWR:Herb:10488		20	United States	Alaska	Soldotna, forest 2.3km southeast of Headquarters Lake, Slikok watershed project site SK25		7/21/2016	2016-07-21	2016-07-21	whole organism	60.44016	-151.03297	10975233		Ascomycota	Bryoria		Fungi	Bryoria fuscescens	KNWR-2016.02-Slikok-Herb	SK25
http://creativecommons.org/publicdomain/zero/1.0/	KNWR:Herb:12330	Bryoria fuscescens	Lecanorales	Parmeliaceae	Lecanoromycetes		(same lot as) KNWR:Herb http://arctos.database.museum/guid/KNWR:Herb:10488		20	United States	Alaska	Soldotna, forest 2.3km southeast of Headquarters Lake, Slikok watershed project site SK25		7/21/2016	2016-07-21	2016-07-21	whole organism	60.44016	-151.03297	10975233		Ascomycota	Bryoria		Fungi	Bryoria fuscescens	KNWR-2016.02-Slikok-Herb	SK25
http://creativecommons.org/publicdomain/zero/1.0/	KNWR:Herb:12339	Lobaria pulmonaria			Lecanoromycetes		(same lot as) KNWR:Herb http://arctos.database.museum/guid/KNWR:Herb:10488		20	United States	Alaska	Soldotna, forest 2.3km southeast of Headquarters Lake, Slikok watershed project site SK25		7/21/2016	2016-07-21	2016-07-21	whole organism	60.44016	-151.03297	10975233		Ascomycota	Lobaria		Fungi	Lobaria pulmonaria	KNWR-2016.02-Slikok-Herb	SK25
http://creativecommons.org/publicdomain/zero/1.0/	KNWR:Herb:12347	Peltigera canina		Peltigeraceae	Lecanoromycetes		(same lot as) KNWR:Herb http://arctos.database.museum/guid/KNWR:Herb:10488		20	United States	Alaska	Soldotna, forest 2.3km southeast of Headquarters Lake, Slikok watershed project site SK25		7/21/2016	2016-07-21	2016-07-21	whole organism	60.44016	-151.03297	10975233		Ascomycota	Peltigera		Fungi	Peltigera canina	KNWR-2016.02-Slikok-Herb	SK25
http://creativecommons.org/publicdomain/zero/1.0/	KNWRObs:Bird:413	Setophaga coronata	Passeriformes	Parulidae	Aves			Todd Eskelin	87	United States	Alaska	Soldotna, forest 2km southeast of Headquarters Lake, Slikok watershed project site MG41	Variable Circular Plot survey with methods adapted from the Alaska Landbird Monitoring System (ALMS) protocol.	6/17/2016	2016-06-17T13:46:00Z	2016-06-17T13:47:00Z	media	60.44036	-151.04208	11367463	wild caught	Chordata	Setophaga	Max error distance was set to distance + 10 m to account for the observer being positioned off of plot center.	Animalia	Setophaga coronata	KNWR-2016.01-Slikok-ObsBird	MG41
http://creativecommons.org/publicdomain/zero/1.0/	KNWRObs:Bird:423	Regulus calendula	Passeriformes	Regulidae	Aves			Todd Eskelin	70	United States	Alaska	Soldotna, Ski Hill Road, off of Centennial Trail 480m northeast of Kenai National Wildlife Refuge headquarters building, Slikok watershed project site SK03	Variable Circular Plot survey with methods adapted from the Alaska Landbird Monitoring System (ALMS) protocol.	6/14/2016	2016-06-14T12:34:00Z	2016-06-14T12:35:00Z	media	60.46775	-151.06698	11367469	wild caught	Chordata	Regulus	Max error distance was set to distance + 10 m to account for the observer being positioned off of plot center.	Animalia	Regulus calendula	KNWR-2016.01-Slikok-ObsBird	SK03
http://creativecommons.org/publicdomain/zero/1.0/	KNWRObs:Bird:430	Contopus sordidulus	Passeriformes	Tyrannidae	Aves			Dawn Magness	18	United States	Alaska	Soldotna, Ski Hill Road, forest 840m northeast of Headquarters Lake, Slikok watershed project site SK04	Variable Circular Plot survey with methods adapted from the Alaska Landbird Monitoring System (ALMS) protocol.	6/14/2016	2016-06-14T14:09:00Z	2016-06-14T14:10:00Z	media	60.46735	-151.04875	11367478	wild caught	Chordata	Contopus	Max error distance was set to distance + 10 m to account for the observer being positioned off of plot center.	Animalia	Contopus sordidulus	KNWR-2016.01-Slikok-ObsBird	SK04
http://creativecommons.org/publicdomain/zero/1.0/	KNWRObs:Bird:471	Junco hyemalis hyemalis	Passeriformes	Passerellidae	Aves			Todd Eskelin	47	United States	Alaska	Soldotna, wetland 490m south of Headquarters Lake, Slikok watershed project site SK16	Variable Circular Plot survey with methods adapted from the Alaska Landbird Monitoring System (ALMS) protocol.	6/16/2016	2016-06-16T13:22:00Z	2016-06-16T13:23:00Z	media	60.44989	-151.06859	11367518	wild caught	Chordata	Junco	Max error distance was set to distance + 10 m to account for the observer being positioned off of plot center.	Animalia	Junco hyemalis	KNWR-2016.01-Slikok-ObsBird	SK16
http://creativecommons.org/publicdomain/zero/1.0/	KNWRObs:Bird:475	Zonotrichia leucophrys	Passeriformes	Passerellidae	Aves			Todd Eskelin	40	United States	Alaska	Soldotna, wetland 490m south of Headquarters Lake, Slikok watershed project site SK16	Variable Circular Plot survey with methods adapted from the Alaska Landbird Monitoring System (ALMS) protocol.	6/16/2016	2016-06-16T13:22:00Z	2016-06-16T13:23:00Z	media	60.44989	-151.06859	11367522	wild caught	Chordata	Zonotrichia	Max error distance was set to distance + 10 m to account for the observer being positioned off of plot center.	Animalia	Zonotrichia leucophrys	KNWR-2016.01-Slikok-ObsBird	SK16
http://creativecommons.org/publicdomain/zero/1.0/	KNWRObs:Bird:443	Certhia americana	Passeriformes	Certhiidae	Aves			Todd Eskelin	24	United States	Alaska	Soldotna, Ski Hill Road, Slikok watershed project site SK08	Variable Circular Plot survey with methods adapted from the Alaska Landbird Monitoring System (ALMS) protocol.	6/14/2016	2016-06-14T14:51:00Z	2016-06-14T14:52:00Z	media	60.45921	-151.08601	11367490	wild caught	Chordata	Certhia	Max error distance was set to distance + 10 m to account for the observer being positioned off of plot center.	Animalia	Certhia americana	KNWR-2016.01-Slikok-ObsBird	SK08
http://creativecommons.org/publicdomain/zero/1.0/	KNWRObs:Bird:487	Catharus ustulatus	Passeriformes	Turdidae	Aves			Dawn Magness	40	United States	Alaska	Soldotna, forest 940m southeast of Headquarters Lake, Slikok watershed project site SK17	Variable Circular Plot survey with methods adapted from the Alaska Landbird Monitoring System (ALMS) protocol.	6/15/2016	2016-06-15T14:34:00Z	2016-06-15T14:35:00Z	media	60.44949	-151.05037	11367534	wild caught	Chordata	Catharus	Max error distance was set to distance + 10 m to account for the observer being positioned off of plot center.	Animalia	Catharus ustulatus	KNWR-2016.01-Slikok-ObsBird	SK17
http://creativecommons.org/publicdomain/zero/1.0/	KNWRObs:Bird:491	Loxia leucoptera	Passeriformes	Fringillidae	Aves			Dawn Magness	40	United States	Alaska	Soldotna, forest 940m southeast of Headquarters Lake, Slikok watershed project site SK17	Variable Circular Plot survey with methods adapted from the Alaska Landbird Monitoring System (ALMS) protocol.	6/15/2016	2016-06-15T14:34:00Z	2016-06-15T14:35:00Z	media	60.44949	-151.05037	11367534	wild caught	Chordata	Loxia	Max error distance was set to distance + 10 m to account for the observer being positioned off of plot center.	Animalia	Loxia leucoptera	KNWR-2016.01-Slikok-ObsBird	SK17
http://creativecommons.org/publicdomain/zero/1.0/	KNWRObs:Bird:493	Setophaga coronata	Passeriformes	Parulidae	Aves			Dawn Magness	30	United States	Alaska	Soldotna, forest 940m southeast of Headquarters Lake, Slikok watershed project site SK17	Variable Circular Plot survey with methods adapted from the Alaska Landbird Monitoring System (ALMS) protocol.	6/15/2016	2016-06-15T14:34:00Z	2016-06-15T14:35:00Z	media	60.44949	-151.05037	11367536	wild caught	Chordata	Setophaga	Max error distance was set to distance + 10 m to account for the observer being positioned off of plot center.	Animalia	Setophaga coronata	KNWR-2016.01-Slikok-ObsBird	SK17
http://creativecommons.org/publicdomain/zero/1.0/	KNWRObs:Bird:500	Loxia leucoptera	Passeriformes	Fringillidae	Aves			Todd Eskelin	85	United States	Alaska	Soldotna, forest 610m southweast of Nordic Lake, Slikok watershed project site SK22	Variable Circular Plot survey with methods adapted from the Alaska Landbird Monitoring System (ALMS) protocol.	6/16/2016	2016-06-16T13:05:00Z	2016-06-16T13:06:00Z	media	60.44135	-151.08761	11367543	wild caught	Chordata	Loxia	Max error distance was set to distance + 10 m to account for the observer being positioned off of plot center.	Animalia	Loxia leucoptera	KNWR-2016.01-Slikok-ObsBird	SK22
http://creativecommons.org/publicdomain/zero/1.0/	KNWRObs:Bird:513	Empidonax alnorum	Passeriformes	Tyrannidae	Aves			Todd Eskelin	77	United States	Alaska	Soldotna, forest 880m southeast of Nordic Lake, Slikok watershed project site SK23	Variable Circular Plot survey with methods adapted from the Alaska Landbird Monitoring System (ALMS) protocol.	6/15/2016	2016-06-15T14:38:00Z	2016-06-15T14:39:00Z	media	60.44095	-151.0694	11367556	wild caught	Chordata	Empidonax	Max error distance was set to distance + 10 m to account for the observer being positioned off of plot center.	Animalia	Empidonax alnorum	KNWR-2016.01-Slikok-ObsBird	SK23
http://creativecommons.org/publicdomain/zero/1.0/	KNWRObs:Bird:24	Zonotrichia leucophrys	Passeriformes	Passerellidae	Aves			Dawn Magness	120	United States	Alaska	Soldotna, muskeg 120m northeast of Headquarters Lake, Slikok watershed project site MG08	Variable Circular Plot survey with methods adapted from the Alaska Landbird Monitoring System (ALMS) protocol.	6/14/2016	2016-06-14T15:32:00Z	2016-06-14T15:33:00Z	media	60.46309	-151.05827	11367103	wild caught	Chordata	Zonotrichia	Max error distance was set to distance + 10 m to account for the observer being positioned off of plot center.	Animalia	Zonotrichia leucophrys	KNWR-2016.01-Slikok-ObsBird	MG08
http://creativecommons.org/publicdomain/zero/1.0/	KNWRObs:Bird:25	Melanitta perspicillata	Anseriformes	Anatidae	Aves			Dawn Magness	40	United States	Alaska	Soldotna, muskeg 120m northeast of Headquarters Lake, Slikok watershed project site MG08	Variable Circular Plot survey with methods adapted from the Alaska Landbird Monitoring System (ALMS) protocol.	6/14/2016	2016-06-14T15:32:00Z	2016-06-14T15:33:00Z	media	60.46309	-151.05827	11367097	wild caught	Chordata	Melanitta	Max error distance was set to distance + 10 m to account for the observer being positioned off of plot center.	Animalia	Melanitta perspicillata	KNWR-2016.01-Slikok-ObsBird	MG08
http://creativecommons.org/publicdomain/zero/1.0/	KNWRObs:Bird:36	Tringa melanoleuca	Charadriiformes	Scolopacidae	Aves			Dawn Magness	160	United States	Alaska	Soldotna, Ski Hill Road, Centennial Trail north of Headquarters Lake, Slikok watershed project site MG02	Variable Circular Plot survey with methods adapted from the Alaska Landbird Monitoring System (ALMS) protocol.	6/14/2016	2016-06-14T13:21:00Z	2016-06-14T13:22:00Z	media	60.46755	-151.05787	11367110	wild caught	Chordata	Tringa	Max error distance was set to distance + 10 m to account for the observer being positioned off of plot center.	Animalia	Tringa melanoleuca	KNWR-2016.01-Slikok-ObsBird	MG02
http://creativecommons.org/publicdomain/zero/1.0/	KNWRObs:Bird:37	Leiothlypis celata	Passeriformes	Parulidae	Aves			Todd Eskelin	72	United States	Alaska	Soldotna, 100m west of Sterling Highway and 1.3km from intersection with Funny River Road, Slikok watershed project site MG04	Variable Circular Plot survey with methods adapted from the Alaska Landbird Monitoring System (ALMS) protocol.	6/14/2016	2016-06-14T13:15:00Z	2016-06-14T13:16:00Z	media	60.46387	-151.09473	11367111	wild caught	Chordata	Leiothlypis	Max error distance was set to distance + 10 m to account for the observer being positioned off of plot center.	Animalia	Leiothlypis celata	KNWR-2016.01-Slikok-ObsBird	MG04
http://creativecommons.org/publicdomain/zero/1.0/	KNWRObs:Bird:2	Catharus ustulatus	Passeriformes	Turdidae	Aves			Dawn Magness	60	United States	Alaska	Soldotna, Ski Hill Road, Centennial Trail north of Headquarters Lake, Slikok watershed project site MG02	Variable Circular Plot survey with methods adapted from the Alaska Landbird Monitoring System (ALMS) protocol.	6/14/2016	2016-06-14T13:21:00Z	2016-06-14T13:22:00Z	media	60.46755	-151.05787	11366622	wild caught	Chordata	Catharus	Max error distance was set to distance + 10 m to account for the observer being positioned off of plot center.	Animalia	Catharus ustulatus	KNWR-2016.01-Slikok-ObsBird	MG02
http://creativecommons.org/publicdomain/zero/1.0/	KNWRObs:Bird:41	Tringa melanoleuca	Charadriiformes	Scolopacidae	Aves			Todd Eskelin	150	United States	Alaska	Soldotna, 100m west of Sterling Highway and 1.3km from intersection with Funny River Road, Slikok watershed project site MG04	Variable Circular Plot survey with methods adapted from the Alaska Landbird Monitoring System (ALMS) protocol.	6/14/2016	2016-06-14T13:15:00Z	2016-06-14T13:16:00Z	media	60.46387	-151.09473	11367115	wild caught	Chordata	Tringa	Max error distance was set to distance + 10 m to account for the observer being positioned off of plot center.	Animalia	Tringa melanoleuca	KNWR-2016.01-Slikok-ObsBird	MG04
http://creativecommons.org/publicdomain/zero/1.0/	KNWRObs:Bird:42	Poecile atricapillus	Passeriformes	Paridae	Aves			Todd Eskelin	49	United States	Alaska	Soldotna, 100m west of Sterling Highway and 1.3km from intersection with Funny River Road, Slikok watershed project site MG04	Variable Circular Plot survey with methods adapted from the Alaska Landbird Monitoring System (ALMS) protocol.	6/14/2016	2016-06-14T13:15:00Z	2016-06-14T13:16:00Z	media	60.46387	-151.09473	11367116	wild caught	Chordata	Poecile	Max error distance was set to distance + 10 m to account for the observer being positioned off of plot center.	Animalia	Poecile atricapillus	KNWR-2016.01-Slikok-ObsBird	MG04
http://creativecommons.org/publicdomain/zero/1.0/	KNWRObs:Bird:67	Larus canus	Charadriiformes	Laridae	Aves			Dawn Magness	25	United States	Alaska	Soldotna, Ski Hill Road, ski trails between new visitor center and old septic leach field, Slikok watershed project site MG06	Variable Circular Plot survey with methods adapted from the Alaska Landbird Monitoring System (ALMS) protocol.	6/17/2016	2016-06-17T16:37:00Z	2016-06-17T16:38:00Z	media	60.46348	-151.0765	11367140	wild caught	Chordata	Larus	Max error distance was set to distance + 10 m to account for the observer being positioned off of plot center.	Animalia	Larus canus	KNWR-2016.01-Slikok-ObsBird	MG06
http://creativecommons.org/publicdomain/zero/1.0/	KNWRObs:Bird:63	Acanthis flammea	Passeriformes	Fringillidae	Aves			Dawn Magness	15	United States	Alaska	Soldotna, Ski Hill Road, ski trails between new visitor center and old septic leach field, Slikok watershed project site MG06	Variable Circular Plot survey with methods adapted from the Alaska Landbird Monitoring System (ALMS) protocol.	6/17/2016	2016-06-17T16:37:00Z	2016-06-17T16:38:00Z	media	60.46348	-151.0765	11367136	wild caught	Chordata	Acanthis	Max error distance was set to distance + 10 m to account for the observer being positioned off of plot center.	Animalia	Acanthis flammea	KNWR-2016.01-Slikok-ObsBird	MG06
http://creativecommons.org/publicdomain/zero/1.0/	KNWRObs:Bird:85	Catharus ustulatus	Passeriformes	Turdidae	Aves			Dawn Magness	63	United States	Alaska	Soldotna, muskeg 0.6km northeast of Headquarters Lake, Slikok watershed project site MG09	Variable Circular Plot survey with methods adapted from the Alaska Landbird Monitoring System (ALMS) protocol.	6/14/2016	2016-06-14T14:50:00Z	2016-06-14T14:51:00Z	media	60.46289	-151.04916	11367156	wild caught	Chordata	Catharus	Max error distance was set to distance + 10 m to account for the observer being positioned off of plot center.	Animalia	Catharus ustulatus	KNWR-2016.01-Slikok-ObsBird	MG09
http://creativecommons.org/publicdomain/zero/1.0/	KNWRObs:Herb:83	Cladonia	Lecanorales	Cladoniaceae	Lecanoromycetes			Matt Bowser	20	United States	Alaska	Soldotna, muskeg 120m northeast of Headquarters Lake, Slikok watershed project site MG08		7/22/2016	2016-07-22	2016-07-22	media	60.46309	-151.05827	10975199		Ascomycota	Cladonia		Fungi		KNWR-2016.01-Slikok-ObsHerb	MG08
http://creativecommons.org/publicdomain/zero/1.0/	KNWRObs:Herb:92	Picea glauca	Pinales, Coniferales	Pinaceae	Coniferopsida, Pinopsida			Matt Bowser	20	United States	Alaska	Soldotna, forest 720km southeast of Headquarters Lake, Slikok watershed project site MG21		7/20/2016	2016-07-20	2016-07-20	media	60.45396	-151.04997	10975209		Tracheophyta	Picea		Plantae	Picea glauca	KNWR-2016.01-Slikok-ObsHerb	MG21
http://creativecommons.org/publicdomain/zero/1.0/	KNWRObs:Herb:12	Aconitum delphiniifolium	Ranunculales	Ranunculaceae	Magnoliopsida			Matt Bowser	20	United States	Alaska	Soldotna, Ski Hill Road, Slikok watershed project site SK08		7/22/2016	2016-07-22	2016-07-22	media	60.45921	-151.08601	10975226		Tracheophyta	Aconitum		Plantae	Aconitum delphiniifolium	KNWR-2016.01-Slikok-ObsHerb	SK08
http://creativecommons.org/publicdomain/zero/1.0/	KNWRObs:Herb:37	Vaccinium oxycoccos	Ericales	Ericaceae	Magnoliopsida			Matt Bowser	20	United States	Alaska	Soldotna, muskeg 230m southeast of Headquarters Lake, Slikok watershed project site MG20		7/20/2016	2016-07-20	2016-07-20	media	60.45415	-151.05908	10975208		Tracheophyta	Vaccinium		Plantae	Vaccinium oxycoccos	KNWR-2016.01-Slikok-ObsHerb	MG20
http://creativecommons.org/publicdomain/zero/1.0/	KNWRObs:Herb:45	Equisetum sylvaticum	Equisetales	Equisetaceae	Equisetopsida			Matt Bowser	20	United States	Alaska	Soldotna, forest 720km southeast of Headquarters Lake, Slikok watershed project site MG21		7/20/2016	2016-07-20	2016-07-20	media	60.45396	-151.04997	10975209		Tracheophyta	Equisetum		Plantae	Equisetum sylvaticum	KNWR-2016.01-Slikok-ObsHerb	MG21
http://creativecommons.org/publicdomain/zero/1.0/	KNWRObs:Herb:7	Goodyera repens	Asparagales	Orchidaceae	Liliopsida			Matt Bowser	20	United States	Alaska	Soldotna, Ski Hill Road, Centennial Trail north of Headquarters Lake, Slikok watershed project site MG02		7/19/2016	2016-07-19	2016-07-19	media	60.46755	-151.05787	10975194		Tracheophyta	Goodyera		Plantae	Goodyera repens	KNWR-2016.01-Slikok-ObsHerb	MG02
http://creativecommons.org/publicdomain/zero/1.0/	KNWRObs:Bird:92	Turdus migratorius	Passeriformes	Turdidae	Aves			Todd Eskelin	96	United States	Alaska	Soldotna, 40m east of Sterling Highway 480m northeast of intersection with south end of Ski Hill Road, Slikok watershed project site MG10	Variable Circular Plot survey with methods adapted from the Alaska Landbird Monitoring System (ALMS) protocol.	6/14/2016	2016-06-14T12:24:00Z	2016-06-14T12:25:00Z	media	60.45941	-151.09513	11367162	wild caught	Chordata	Turdus	Max error distance was set to distance + 10 m to account for the observer being positioned off of plot center.	Animalia	Turdus migratorius	KNWR-2016.01-Slikok-ObsBird	MG10
http://creativecommons.org/publicdomain/zero/1.0/	KNWRObs:Bird:94	Setophaga coronata	Passeriformes	Parulidae	Aves			Todd Eskelin	33	United States	Alaska	Soldotna, 40m east of Sterling Highway 480m northeast of intersection with south end of Ski Hill Road, Slikok watershed project site MG10	Variable Circular Plot survey with methods adapted from the Alaska Landbird Monitoring System (ALMS) protocol.	6/14/2016	2016-06-14T12:24:00Z	2016-06-14T12:25:00Z	media	60.45941	-151.09513	11367164	wild caught	Chordata	Setophaga	Max error distance was set to distance + 10 m to account for the observer being positioned off of plot center.	Animalia	Setophaga coronata	KNWR-2016.01-Slikok-ObsBird	MG10
http://creativecommons.org/publicdomain/zero/1.0/	KNWRObs:Bird:105	Regulus calendula	Passeriformes	Regulidae	Aves			Todd Eskelin	51	United States	Alaska	Soldotna, Ski Hill Road, off of Howling Hill Trail, Slikok watershed project site MG17	Variable Circular Plot survey with methods adapted from the Alaska Landbird Monitoring System (ALMS) protocol.	6/14/2016	2016-06-14T15:33:00Z	2016-06-14T15:34:00Z	media	60.45475	-151.08641	11367176	wild caught	Chordata	Regulus	Max error distance was set to distance + 10 m to account for the observer being positioned off of plot center.	Animalia	Regulus calendula	KNWR-2016.01-Slikok-ObsBird	MG17
http://creativecommons.org/publicdomain/zero/1.0/	KNWRObs:Bird:120	Zonotrichia leucophrys	Passeriformes	Passerellidae	Aves			Todd Eskelin	95	United States	Alaska	Soldotna, shore of southeastern bay of Headquarters Lake, Slikok watershed project site MG19	Variable Circular Plot survey with methods adapted from the Alaska Landbird Monitoring System (ALMS) protocol.	6/16/2016	2016-06-16T12:24:00Z	2016-06-16T12:25:00Z	media	60.45435	-151.06819	11367191	wild caught	Chordata	Zonotrichia	Max error distance was set to distance + 10 m to account for the observer being positioned off of plot center.	Animalia	Zonotrichia leucophrys	KNWR-2016.01-Slikok-ObsBird	MG19
http://creativecommons.org/publicdomain/zero/1.0/	KNWRObs:Bird:130	Passerculus sandwichensis	Passeriformes	Passerellidae	Aves			Todd Eskelin	110	United States	Alaska	Soldotna, in wetland 510m southwest of Headquarters Lake, Slikok watershed project site MG18	Variable Circular Plot survey with methods adapted from the Alaska Landbird Monitoring System (ALMS) protocol.	6/16/2016	2016-06-16T15:18:00Z	2016-06-16T15:19:00Z	media	60.45455	-151.0773	11367201	wild caught	Chordata	Passerculus	Max error distance was set to distance + 10 m to account for the observer being positioned off of plot center.	Animalia	Passerculus sandwichensis	KNWR-2016.01-Slikok-ObsBird	MG18
http://creativecommons.org/publicdomain/zero/1.0/	KNWRObs:Bird:163	Leiothlypis celata	Passeriformes	Parulidae	Aves			Dawn Magness	40	United States	Alaska	Soldotna, 210m east-southeast of intersection of Sterling Highway and south end of Ski Hill Road, Slikok watershed project site MG16	Variable Circular Plot survey with methods adapted from the Alaska Landbird Monitoring System (ALMS) protocol.	6/17/2016	2016-06-17T15:01:00Z	2016-06-17T15:02:00Z	media	60.45494	-151.09552	11367233	wild caught	Chordata	Leiothlypis	Max error distance was set to distance + 10 m to account for the observer being positioned off of plot center.	Animalia	Leiothlypis celata	KNWR-2016.01-Slikok-ObsBird	MG16
http://creativecommons.org/publicdomain/zero/1.0/	KNWRObs:Bird:168	Pica hudsonia	Passeriformes	Corvidae	Aves			Dawn Magness	70	United States	Alaska	Soldotna, 210m east-southeast of intersection of Sterling Highway and south end of Ski Hill Road, Slikok watershed project site MG16	Variable Circular Plot survey with methods adapted from the Alaska Landbird Monitoring System (ALMS) protocol.	6/17/2016	2016-06-17T15:01:00Z	2016-06-17T15:02:00Z	media	60.45494	-151.09552	11367238	wild caught	Chordata	Pica	Max error distance was set to distance + 10 m to account for the observer being positioned off of plot center.	Animalia	Pica hudsonia	KNWR-2016.01-Slikok-ObsBird	MG16
http://creativecommons.org/publicdomain/zero/1.0/	KNWRObs:Bird:181	Zonotrichia leucophrys	Passeriformes	Passerellidae	Aves			Dawn Magness	74	United States	Alaska	Soldotna, muskeg 230m southeast of Headquarters Lake, Slikok watershed project site MG20	Variable Circular Plot survey with methods adapted from the Alaska Landbird Monitoring System (ALMS) protocol.	6/15/2016	2016-06-15T16:28:00Z	2016-06-15T16:29:00Z	media	60.45415	-151.05908	11367250	wild caught	Chordata	Zonotrichia	Max error distance was set to distance + 10 m to account for the observer being positioned off of plot center.	Animalia	Zonotrichia leucophrys	KNWR-2016.01-Slikok-ObsBird	MG20
http://creativecommons.org/publicdomain/zero/1.0/	KNWRObs:Bird:183	Catharus ustulatus	Passeriformes	Turdidae	Aves			Dawn Magness	110	United States	Alaska	Soldotna, muskeg 230m southeast of Headquarters Lake, Slikok watershed project site MG20	Variable Circular Plot survey with methods adapted from the Alaska Landbird Monitoring System (ALMS) protocol.	6/15/2016	2016-06-15T16:28:00Z	2016-06-15T16:29:00Z	media	60.45415	-151.05908	11367252	wild caught	Chordata	Catharus	Max error distance was set to distance + 10 m to account for the observer being positioned off of plot center.	Animalia	Catharus ustulatus	KNWR-2016.01-Slikok-ObsBird	MG20
http://creativecommons.org/publicdomain/zero/1.0/	KNWRObs:Bird:228	Junco hyemalis hyemalis	Passeriformes	Passerellidae	Aves			Todd Eskelin	89	United States	Alaska	Soldotna, muskeg 250m east of Arc Lake, Slikok watershed project site MG22	Variable Circular Plot survey with methods adapted from the Alaska Landbird Monitoring System (ALMS) protocol.	6/14/2016	2016-06-14T16:21:00Z	2016-06-14T16:22:00Z	media	60.45048	-151.09592	11367296	wild caught	Chordata	Junco	Max error distance was set to distance + 10 m to account for the observer being positioned off of plot center.	Animalia	Junco hyemalis	KNWR-2016.01-Slikok-ObsBird	MG22
http://creativecommons.org/publicdomain/zero/1.0/	KNWRObs:Bird:193	Catharus ustulatus	Passeriformes	Turdidae	Aves			Dawn Magness	100	United States	Alaska	Soldotna, forest 720km southeast of Headquarters Lake, Slikok watershed project site MG21	Variable Circular Plot survey with methods adapted from the Alaska Landbird Monitoring System (ALMS) protocol.	6/15/2016	2016-06-15T13:35:00Z	2016-06-15T13:36:00Z	media	60.45396	-151.04997	11367262	wild caught	Chordata	Catharus	Max error distance was set to distance + 10 m to account for the observer being positioned off of plot center.	Animalia	Catharus ustulatus	KNWR-2016.01-Slikok-ObsBird	MG21
http://creativecommons.org/publicdomain/zero/1.0/	KNWRObs:Bird:196	Setophaga coronata	Passeriformes	Parulidae	Aves			Dawn Magness	32	United States	Alaska	Soldotna, forest 720km southeast of Headquarters Lake, Slikok watershed project site MG21	Variable Circular Plot survey with methods adapted from the Alaska Landbird Monitoring System (ALMS) protocol.	6/15/2016	2016-06-15T13:35:00Z	2016-06-15T13:36:00Z	media	60.45396	-151.04997	11367265	wild caught	Chordata	Setophaga	Max error distance was set to distance + 10 m to account for the observer being positioned off of plot center.	Animalia	Setophaga coronata	KNWR-2016.01-Slikok-ObsBird	MG21
http://creativecommons.org/publicdomain/zero/1.0/	KNWRObs:Bird:203	Loxia leucoptera	Passeriformes	Fringillidae	Aves			Dawn Magness	74	United States	Alaska	Soldotna, forest 180m southwest of Nordic Lake, Slikok watershed project site MG29	Variable Circular Plot survey with methods adapted from the Alaska Landbird Monitoring System (ALMS) protocol.	6/17/2016	2016-06-17T13:22:00Z	2016-06-17T13:23:00Z	media	60.44581	-151.08721	11367272	wild caught	Chordata	Loxia	Max error distance was set to distance + 10 m to account for the observer being positioned off of plot center.	Animalia	Loxia leucoptera	KNWR-2016.01-Slikok-ObsBird	MG29
http://creativecommons.org/publicdomain/zero/1.0/	KNWRObs:Bird:221	Leiothlypis celata	Passeriformes	Parulidae	Aves			Dawn Magness	50	United States	Alaska	Soldotna, forest 720km southeast of Headquarters Lake, Slikok watershed project site MG21	Variable Circular Plot survey with methods adapted from the Alaska Landbird Monitoring System (ALMS) protocol.	6/15/2016	2016-06-15T13:35:00Z	2016-06-15T13:36:00Z	media	60.45396	-151.04997	11367288	wild caught	Chordata	Leiothlypis	Max error distance was set to distance + 10 m to account for the observer being positioned off of plot center.	Animalia	Leiothlypis celata	KNWR-2016.01-Slikok-ObsBird	MG21
http://creativecommons.org/publicdomain/zero/1.0/	KNWRObs:Bird:248	Catharus ustulatus	Passeriformes	Turdidae	Aves			Todd Eskelin	170	United States	Alaska	Soldotna, forest 120m east of Nordic Lake, Slikok watershed project site MG24	Variable Circular Plot survey with methods adapted from the Alaska Landbird Monitoring System (ALMS) protocol.	6/16/2016	2016-06-16T14:06:00Z	2016-06-16T14:07:00Z	media	60.45008	-151.0777	11367315	wild caught	Chordata	Catharus	Max error distance was set to distance + 10 m to account for the observer being positioned off of plot center.	Animalia	Catharus ustulatus	KNWR-2016.01-Slikok-ObsBird	MG24
http://creativecommons.org/publicdomain/zero/1.0/	KNWRObs:Bird:251	Catharus ustulatus	Passeriformes	Turdidae	Aves			Dawn Magness	51	United States	Alaska	Soldotna, forest 600m south-southeast of Headquarters Lake, Slikok watershed project site MG26	Variable Circular Plot survey with methods adapted from the Alaska Landbird Monitoring System (ALMS) protocol.	6/15/2016	2016-06-15T15:37:00Z	2016-06-15T15:38:00Z	media	60.44969	-151.05948	11367317	wild caught	Chordata	Catharus	Max error distance was set to distance + 10 m to account for the observer being positioned off of plot center.	Animalia	Catharus ustulatus	KNWR-2016.01-Slikok-ObsBird	MG26
http://creativecommons.org/publicdomain/zero/1.0/	KNWRObs:Bird:252	Catharus ustulatus	Passeriformes	Turdidae	Aves			Dawn Magness	30	United States	Alaska	Soldotna, forest 600m south-southeast of Headquarters Lake, Slikok watershed project site MG26	Variable Circular Plot survey with methods adapted from the Alaska Landbird Monitoring System (ALMS) protocol.	6/15/2016	2016-06-15T15:37:00Z	2016-06-15T15:38:00Z	media	60.44969	-151.05948	11367318	wild caught	Chordata	Catharus	Max error distance was set to distance + 10 m to account for the observer being positioned off of plot center.	Animalia	Catharus ustulatus	KNWR-2016.01-Slikok-ObsBird	MG26
http://creativecommons.org/publicdomain/zero/1.0/	KNWRObs:Bird:260	Setophaga coronata	Passeriformes	Parulidae	Aves			Dawn Magness	28	United States	Alaska	Soldotna, forest 600m south-southeast of Headquarters Lake, Slikok watershed project site MG26	Variable Circular Plot survey with methods adapted from the Alaska Landbird Monitoring System (ALMS) protocol.	6/15/2016	2016-06-15T15:37:00Z	2016-06-15T15:38:00Z	media	60.44969	-151.05948	11367324	wild caught	Chordata	Setophaga	Max error distance was set to distance + 10 m to account for the observer being positioned off of plot center.	Animalia	Setophaga coronata	KNWR-2016.01-Slikok-ObsBird	MG26
http://creativecommons.org/publicdomain/zero/1.0/	KNWRObs:Bird:278	Catharus ustulatus	Passeriformes	Turdidae	Aves			Dawn Magness	140	United States	Alaska	Soldotna, forest 180m south-southeast of Nordic Lake, Slikok watershed project site MG30	Variable Circular Plot survey with methods adapted from the Alaska Landbird Monitoring System (ALMS) protocol.	6/16/2016	2016-06-16T12:29:00Z	2016-06-16T12:30:00Z	media	60.44562	-151.0781	11367337	wild caught	Chordata	Catharus	Max error distance was set to distance + 10 m to account for the observer being positioned off of plot center.	Animalia	Catharus ustulatus	KNWR-2016.01-Slikok-ObsBird	MG30
http://creativecommons.org/publicdomain/zero/1.0/	KNWRObs:Bird:281	Junco hyemalis hyemalis	Passeriformes	Passerellidae	Aves			Dawn Magness	75	United States	Alaska	Soldotna, forest 180m south-southeast of Nordic Lake, Slikok watershed project site MG30	Variable Circular Plot survey with methods adapted from the Alaska Landbird Monitoring System (ALMS) protocol.	6/16/2016	2016-06-16T12:29:00Z	2016-06-16T12:30:00Z	media	60.44562	-151.0781	11367339	wild caught	Chordata	Junco	Max error distance was set to distance + 10 m to account for the observer being positioned off of plot center.	Animalia	Junco hyemalis	KNWR-2016.01-Slikok-ObsBird	MG30
http://creativecommons.org/publicdomain/zero/1.0/	KNWRObs:Bird:286	Catharus ustulatus	Passeriformes	Turdidae	Aves			Dawn Magness	16	United States	Alaska	Soldotna, forest 980m south of Headquarters Lake, Slikok watershed project site MG31	Variable Circular Plot survey with methods adapted from the Alaska Landbird Monitoring System (ALMS) protocol.	6/16/2016	2016-06-16T13:17:00Z	2016-06-16T13:18:00Z	media	60.44542	-151.069	11367344	wild caught	Chordata	Catharus	Max error distance was set to distance + 10 m to account for the observer being positioned off of plot center.	Animalia	Catharus ustulatus	KNWR-2016.01-Slikok-ObsBird	MG31
http://creativecommons.org/publicdomain/zero/1.0/	KNWRObs:Bird:302	Catharus ustulatus	Passeriformes	Turdidae	Aves			Todd Eskelin	72	United States	Alaska	Soldotna, forest between Raven Ridge Trail and Central Peninsula landfill, Slikok watershed project site MG35	Variable Circular Plot survey with methods adapted from the Alaska Landbird Monitoring System (ALMS) protocol.	6/15/2016	2016-06-15T12:19:00Z	2016-06-15T12:20:00Z	media	60.44154	-151.09672	11367360	wild caught	Chordata	Catharus	Max error distance was set to distance + 10 m to account for the observer being positioned off of plot center.	Animalia	Catharus ustulatus	KNWR-2016.01-Slikok-ObsBird	MG35
http://creativecommons.org/publicdomain/zero/1.0/	KNWRObs:Bird:304	Regulus satrapa	Passeriformes	Regulidae	Aves			Todd Eskelin	27	United States	Alaska	Soldotna, forest between Raven Ridge Trail and Central Peninsula landfill, Slikok watershed project site MG35	Variable Circular Plot survey with methods adapted from the Alaska Landbird Monitoring System (ALMS) protocol.	6/15/2016	2016-06-15T12:19:00Z	2016-06-15T12:20:00Z	media	60.44154	-151.09672	11367362	wild caught	Chordata	Regulus	Max error distance was set to distance + 10 m to account for the observer being positioned off of plot center.	Animalia	Regulus satrapa	KNWR-2016.01-Slikok-ObsBird	MG35
http://creativecommons.org/publicdomain/zero/1.0/	KNWRObs:Bird:325	Picoides dorsalis	Piciformes	Picidae	Aves			Todd Eskelin	66	United States	Alaska	Soldotna, forest 1.5km south of Headquarters Lake, Slikok watershed project site MG39	Variable Circular Plot survey with methods adapted from the Alaska Landbird Monitoring System (ALMS) protocol.	6/15/2016	2016-06-15T15:23:00Z	2016-06-15T15:24:00Z	media	60.44076	-151.06029	11367382	wild caught	Chordata	Picoides	Max error distance was set to distance + 10 m to account for the observer being positioned off of plot center.	Animalia	Picoides dorsalis	KNWR-2016.01-Slikok-ObsBird	MG39
http://creativecommons.org/publicdomain/zero/1.0/	KNWRObs:Bird:335	Catharus ustulatus	Passeriformes	Turdidae	Aves			Dawn Magness	40	United States	Alaska	Soldotna, forest 1km south of Headquarters Lake, Slikok watershed project site MG32	Variable Circular Plot survey with methods adapted from the Alaska Landbird Monitoring System (ALMS) protocol.	6/16/2016	2016-06-16T14:07:00Z	2016-06-16T14:08:00Z	media	60.44522	-151.05989	11367392	wild caught	Chordata	Catharus	Max error distance was set to distance + 10 m to account for the observer being positioned off of plot center.	Animalia	Catharus ustulatus	KNWR-2016.01-Slikok-ObsBird	MG32
http://creativecommons.org/publicdomain/zero/1.0/	KNWRObs:Bird:342	Acanthis flammea	Passeriformes	Fringillidae	Aves			Dawn Magness	27	United States	Alaska	Soldotna, forest 1km south of Headquarters Lake, Slikok watershed project site MG32	Variable Circular Plot survey with methods adapted from the Alaska Landbird Monitoring System (ALMS) protocol.	6/16/2016	2016-06-16T14:07:00Z	2016-06-16T14:08:00Z	media	60.44522	-151.05989	11367396	wild caught	Chordata	Acanthis	Max error distance was set to distance + 10 m to account for the observer being positioned off of plot center.	Animalia	Acanthis flammea	KNWR-2016.01-Slikok-ObsBird	MG32
http://creativecommons.org/publicdomain/zero/1.0/	KNWRObs:Bird:345	Passerella iliaca	Passeriformes	Passerellidae	Aves			Dawn Magness	43	United States	Alaska	Soldotna, forest 1.3km southeast of Headquarters Lake, Slikok watershed project site MG33	Variable Circular Plot survey with methods adapted from the Alaska Landbird Monitoring System (ALMS) protocol.	6/16/2016	2016-06-16T15:09:00Z	2016-06-16T15:10:00Z	media	60.44502	-151.05078	11367398	wild caught	Chordata	Passerella	Max error distance was set to distance + 10 m to account for the observer being positioned off of plot center.	Animalia	Passerella iliaca	KNWR-2016.01-Slikok-ObsBird	MG33
http://creativecommons.org/publicdomain/zero/1.0/	KNWRObs:Bird:347	Loxia leucoptera	Passeriformes	Fringillidae	Aves			Dawn Magness	40	United States	Alaska	Soldotna, forest 1.3km southeast of Headquarters Lake, Slikok watershed project site MG33	Variable Circular Plot survey with methods adapted from the Alaska Landbird Monitoring System (ALMS) protocol.	6/16/2016	2016-06-16T15:09:00Z	2016-06-16T15:10:00Z	media	60.44502	-151.05078	11367400	wild caught	Chordata	Loxia	Max error distance was set to distance + 10 m to account for the observer being positioned off of plot center.	Animalia	Loxia leucoptera	KNWR-2016.01-Slikok-ObsBird	MG33
http://creativecommons.org/publicdomain/zero/1.0/	KNWRObs:Bird:350	Junco hyemalis hyemalis	Passeriformes	Passerellidae	Aves			Dawn Magness	32	United States	Alaska	Soldotna, forest 1.3km southeast of Headquarters Lake, Slikok watershed project site MG33	Variable Circular Plot survey with methods adapted from the Alaska Landbird Monitoring System (ALMS) protocol.	6/16/2016	2016-06-16T15:09:00Z	2016-06-16T15:10:00Z	media	60.44502	-151.05078	11367403	wild caught	Chordata	Junco	Max error distance was set to distance + 10 m to account for the observer being positioned off of plot center.	Animalia	Junco hyemalis	KNWR-2016.01-Slikok-ObsBird	MG33
http://creativecommons.org/publicdomain/zero/1.0/	KNWRObs:Bird:390	Junco hyemalis hyemalis	Passeriformes	Passerellidae	Aves			Dawn Magness	35	United States	Alaska	Soldotna, Ski Hill Road, Nordic View Trail by Nordic Lake, Slikok watershed project site SK15	Variable Circular Plot survey with methods adapted from the Alaska Landbird Monitoring System (ALMS) protocol.	6/17/2016	2016-06-17T12:44:00Z	2016-06-17T12:45:00Z	media	60.45028	-151.08681	11367441	wild caught	Chordata	Junco	Max error distance was set to distance + 10 m to account for the observer being positioned off of plot center.	Animalia	Junco hyemalis	KNWR-2016.01-Slikok-ObsBird	SK15
http://creativecommons.org/publicdomain/zero/1.0/	KNWRObs:Bird:395	Catharus ustulatus	Passeriformes	Turdidae	Aves			Dawn Magness	55	United States	Alaska	Soldotna, Ski Hill Road, Nordic View Trail by Nordic Lake, Slikok watershed project site SK15	Variable Circular Plot survey with methods adapted from the Alaska Landbird Monitoring System (ALMS) protocol.	6/17/2016	2016-06-17T12:44:00Z	2016-06-17T12:45:00Z	media	60.45028	-151.08681	11367446	wild caught	Chordata	Catharus	Max error distance was set to distance + 10 m to account for the observer being positioned off of plot center.	Animalia	Catharus ustulatus	KNWR-2016.01-Slikok-ObsBird	SK15
http://creativecommons.org/publicdomain/zero/1.0/	KNWRObs:Bird:360	Catharus ustulatus	Passeriformes	Turdidae	Aves			Dawn Magness	60	United States	Alaska	Soldotna, forest 1.6km southeast of Headquarters Lake, Slikok watershed project site MG34	Variable Circular Plot survey with methods adapted from the Alaska Landbird Monitoring System (ALMS) protocol.	6/16/2016	2016-06-16T16:04:00Z	2016-06-16T16:05:00Z	media	60.44483	-151.04167	11367411	wild caught	Chordata	Catharus	Max error distance was set to distance + 10 m to account for the observer being positioned off of plot center.	Animalia	Catharus ustulatus	KNWR-2016.01-Slikok-ObsBird	MG34
http://creativecommons.org/publicdomain/zero/1.0/	KNWRObs:Herb:62	Lobaria pulmonaria			Lecanoromycetes			Matt Bowser	20	United States	Alaska	Soldotna, Ski Hill Road, Slikok watershed project site SK08		7/22/2016	2016-07-22	2016-07-22	media	60.45921	-151.08601	10975226		Ascomycota	Lobaria		Fungi	Lobaria pulmonaria	KNWR-2016.01-Slikok-ObsHerb	SK08
http://creativecommons.org/publicdomain/zero/1.0/	KNWRObs:Herb:68	Picea glauca	Pinales, Coniferales	Pinaceae	Coniferopsida, Pinopsida			Matt Bowser	20	United States	Alaska	Soldotna, Ski Hill Road, Slikok watershed project site SK08		7/22/2016	2016-07-22	2016-07-22	media	60.45921	-151.08601	10975226		Tracheophyta	Picea		Plantae	Picea glauca	KNWR-2016.01-Slikok-ObsHerb	SK08
http://creativecommons.org/publicdomain/zero/1.0/	KNWRObs:Herb:70	Polytrichum	Polytrichales	Polytrichaceae	Bryopsida			Matt Bowser	20	United States	Alaska	Soldotna, Ski Hill Road, Slikok watershed project site SK08		7/22/2016	2016-07-22	2016-07-22	media	60.45921	-151.08601	10975226		Bryophyta	Polytrichum		Plantae		KNWR-2016.01-Slikok-ObsHerb	SK08
http://creativecommons.org/publicdomain/zero/1.0/	KNWRObs:Herb:77	Vaccinium uliginosum	Ericales	Ericaceae	Magnoliopsida			Matt Bowser	20	United States	Alaska	Soldotna, woods on north shore of Headquarters Lake 200m east of Keen Eye Trail floating dock, Slikok watershed project site MG07		8/1/2016	2016-08-01	2016-08-01	media	60.46328	-151.06739	10975198		Tracheophyta	Vaccinium		Plantae	Vaccinium uliginosum	KNWR-2016.01-Slikok-ObsHerb	MG07
http://creativecommons.org/publicdomain/zero/1.0/	KNWRObs:Herb:101	Galium triflorum	Gentianales	Rubiaceae	Magnoliopsida			Matt Bowser	20	United States	Alaska	Soldotna, forest 1.3km southeast of Headquarters Lake, Slikok watershed project site MG33		7/21/2016	2016-07-21	2016-07-21	media	60.44502	-151.05078	10975218		Tracheophyta	Galium		Plantae	Galium triflorum	KNWR-2016.01-Slikok-ObsHerb	MG33
http://creativecommons.org/publicdomain/zero/1.0/	KNWRObs:Herb:102	Gymnocarpium dryopteris	Polypodiales	Dryopteridaceae	Filicopsida			Matt Bowser	20	United States	Alaska	Soldotna, forest 1.3km southeast of Headquarters Lake, Slikok watershed project site MG33		7/21/2016	2016-07-21	2016-07-21	media	60.44502	-151.05078	10975218		Tracheophyta	Gymnocarpium		Plantae	Gymnocarpium dryopteris	KNWR-2016.01-Slikok-ObsHerb	MG33
http://creativecommons.org/publicdomain/zero/1.0/	KNWRObs:Herb:233	Equisetum pratense	Equisetales	Equisetaceae	Equisetopsida			Matt Bowser	20	United States	Alaska	Soldotna, 40m east of Sterling Highway 480m northeast of intersection with south end of Ski Hill Road, Slikok watershed project site MG10		8/10/2016	2016-08-10	2016-08-10	media	60.45941	-151.09513	10975201		Tracheophyta	Equisetum		Plantae	Equisetum pratense	KNWR-2016.01-Slikok-ObsHerb	MG10
http://creativecommons.org/publicdomain/zero/1.0/	KNWRObs:Herb:105	Listera cordata	Asparagales	Orchidaceae	Liliopsida			Matt Bowser	20	United States	Alaska	Soldotna, forest 1.3km southeast of Headquarters Lake, Slikok watershed project site MG33		7/21/2016	2016-07-21	2016-07-21	media	60.44502	-151.05078	10975218		Tracheophyta	Listera		Plantae	Listera cordata	KNWR-2016.01-Slikok-ObsHerb	MG33
http://creativecommons.org/publicdomain/zero/1.0/	KNWRObs:Herb:106	Lobaria pulmonaria			Lecanoromycetes			Matt Bowser	20	United States	Alaska	Soldotna, forest 1.3km southeast of Headquarters Lake, Slikok watershed project site MG33		7/21/2016	2016-07-21	2016-07-21	media	60.44502	-151.05078	10975218		Ascomycota	Lobaria		Fungi	Lobaria pulmonaria	KNWR-2016.01-Slikok-ObsHerb	MG33
http://creativecommons.org/publicdomain/zero/1.0/	KNWRObs:Herb:109	Oplopanax horridus	Apiales	Araliaceae	Magnoliopsida			Matt Bowser	20	United States	Alaska	Soldotna, forest 1.3km southeast of Headquarters Lake, Slikok watershed project site MG33		7/21/2016	2016-07-21	2016-07-21	media	60.44502	-151.05078	10975218		Tracheophyta	Oplopanax		Plantae	Oplopanax horridus	KNWR-2016.01-Slikok-ObsHerb	MG33
http://creativecommons.org/publicdomain/zero/1.0/	KNWRObs:Herb:140	Carex pauciflora	Poales	Cyperaceae	Liliopsida			Matt Bowser	20	United States	Alaska	Soldotna, muskeg 250m east of Arc Lake, Slikok watershed project site MG22		8/9/2016	2016-08-09	2016-08-09	media	60.45048	-151.09592	10975210		Tracheophyta	Carex		Plantae	Carex pauciflora	KNWR-2016.01-Slikok-ObsHerb	MG22
http://creativecommons.org/publicdomain/zero/1.0/	KNWRObs:Herb:152	Ribes triste	Saxifragales	Grossulariaceae	Magnoliopsida			Matt Bowser	20	United States	Alaska	Soldotna, forest 1.3km southeast of Headquarters Lake, Slikok watershed project site MG33		7/21/2016	2016-07-21	2016-07-21	media	60.44502	-151.05078	10975218		Tracheophyta	Ribes		Plantae	Ribes triste	KNWR-2016.01-Slikok-ObsHerb	MG33
http://creativecommons.org/publicdomain/zero/1.0/	KNWRObs:Herb:154	Rubus idaeus	Rosales	Rosaceae	Magnoliopsida			Matt Bowser	20	United States	Alaska	Soldotna, forest 1.3km southeast of Headquarters Lake, Slikok watershed project site MG33		7/21/2016	2016-07-21	2016-07-21	media	60.44502	-151.05078	10975218		Tracheophyta	Rubus		Plantae	Rubus idaeus	KNWR-2016.01-Slikok-ObsHerb	MG33
http://creativecommons.org/publicdomain/zero/1.0/	KNWRObs:Herb:157	Trientalis europaea	Ericales	Primulaceae	Magnoliopsida			Matt Bowser	20	United States	Alaska	Soldotna, forest 1.3km southeast of Headquarters Lake, Slikok watershed project site MG33		7/21/2016	2016-07-21	2016-07-21	media	60.44502	-151.05078	10975218		Tracheophyta	Trientalis		Plantae	Trientalis europaea	KNWR-2016.01-Slikok-ObsHerb	MG33
http://creativecommons.org/publicdomain/zero/1.0/	KNWRObs:Herb:170	Picea mariana	Pinales, Coniferales	Pinaceae	Coniferopsida, Pinopsida			Matt Bowser	20	United States	Alaska	Soldotna, Ski Hill Road, Nordic View Trail by Nordic Lake, Slikok watershed project site SK15		8/9/2016	2016-08-09	2016-08-09	media	60.45028	-151.08681	10975227		Tracheophyta	Picea		Plantae	Picea mariana	KNWR-2016.01-Slikok-ObsHerb	SK15
http://creativecommons.org/publicdomain/zero/1.0/	KNWRObs:Herb:180	Equisetum arvense	Equisetales	Equisetaceae	Equisetopsida			Matt Bowser	20	United States	Alaska	Soldotna, muskeg 0.6km northeast of Headquarters Lake, Slikok watershed project site MG09		7/19/2016	2016-07-19	2016-07-19	media	60.46289	-151.04916	10975200		Tracheophyta	Equisetum		Plantae	Equisetum arvense	KNWR-2016.01-Slikok-ObsHerb	MG09
http://creativecommons.org/publicdomain/zero/1.0/	KNWRObs:Herb:184	Picea mariana	Pinales, Coniferales	Pinaceae	Coniferopsida, Pinopsida			Matt Bowser	20	United States	Alaska	Soldotna, muskeg 0.6km northeast of Headquarters Lake, Slikok watershed project site MG09		7/19/2016	2016-07-19	2016-07-19	media	60.46289	-151.04916	10975200		Tracheophyta	Picea		Plantae	Picea mariana	KNWR-2016.01-Slikok-ObsHerb	MG09
http://creativecommons.org/publicdomain/zero/1.0/	KNWRObs:Herb:186	Sphagnum	Sphagnales	Sphagnaceae	Sphagnopsida			Matt Bowser	20	United States	Alaska	Soldotna, muskeg 0.6km northeast of Headquarters Lake, Slikok watershed project site MG09		7/19/2016	2016-07-19	2016-07-19	media	60.46289	-151.04916	10975200		Bryophyta	Sphagnum		Plantae		KNWR-2016.01-Slikok-ObsHerb	MG09
http://creativecommons.org/publicdomain/zero/1.0/	KNWRObs:Herb:197	Empetrum nigrum	Ericales	Empetraceae	Magnoliopsida			Matt Bowser	20	United States	Alaska	Soldotna, forest 120m east of Nordic Lake, Slikok watershed project site MG24		8/3/2016	2016-08-03	2016-08-03	media	60.45008	-151.0777	10975211		Tracheophyta	Empetrum		Plantae	Empetrum nigrum	KNWR-2016.01-Slikok-ObsHerb	MG24
http://creativecommons.org/publicdomain/zero/1.0/	KNWRObs:Herb:215	Alnus viridis	Fagales	Betulaceae	Magnoliopsida			Matt Bowser	20	United States	Alaska	Soldotna, forest 940m southeast of Headquarters Lake, Slikok watershed project site SK17		7/20/2016	2016-07-20	2016-07-20	media	60.44949	-151.05037	10975229		Tracheophyta	Alnus		Plantae	Alnus viridis	KNWR-2016.01-Slikok-ObsHerb	SK17
http://creativecommons.org/publicdomain/zero/1.0/	KNWRObs:Herb:222	Oplopanax horridus	Apiales	Araliaceae	Magnoliopsida			Matt Bowser	20	United States	Alaska	Soldotna, forest 940m southeast of Headquarters Lake, Slikok watershed project site SK17		7/20/2016	2016-07-20	2016-07-20	media	60.44949	-151.05037	10975229		Tracheophyta	Oplopanax		Plantae	Oplopanax horridus	KNWR-2016.01-Slikok-ObsHerb	SK17
http://creativecommons.org/publicdomain/zero/1.0/	KNWRObs:Herb:225	Streptopus amplexifolius	Liliales	Liliaceae	Liliopsida			Matt Bowser	20	United States	Alaska	Soldotna, forest 940m southeast of Headquarters Lake, Slikok watershed project site SK17		7/20/2016	2016-07-20	2016-07-20	media	60.44949	-151.05037	10975229		Tracheophyta	Streptopus		Plantae	Streptopus amplexifolius	KNWR-2016.01-Slikok-ObsHerb	SK17
http://creativecommons.org/publicdomain/zero/1.0/	KNWRObs:Herb:247	Salix scouleriana	Malpighiales	Salicaceae	Magnoliopsida			Matt Bowser	20	United States	Alaska	Soldotna, forest 120m east of Nordic Lake, Slikok watershed project site MG24		8/3/2016	2016-08-03	2016-08-03	media	60.45008	-151.0777	10975211		Tracheophyta	Salix		Plantae	Salix scouleriana	KNWR-2016.01-Slikok-ObsHerb	MG24
http://creativecommons.org/publicdomain/zero/1.0/	KNWRObs:Herb:257	Trientalis europaea	Ericales	Primulaceae	Magnoliopsida			Matt Bowser	20	United States	Alaska	Soldotna, forest 1.6km southeast of Headquarters Lake, Slikok watershed project site MG34		7/21/2016	2016-07-21	2016-07-21	media	60.44483	-151.04167	10975219		Tracheophyta	Trientalis		Plantae	Trientalis europaea	KNWR-2016.01-Slikok-ObsHerb	MG34
http://creativecommons.org/publicdomain/zero/1.0/	KNWRObs:Herb:259	Viburnum edule	Dipsacales	Caprifoliaceae	Magnoliopsida			Matt Bowser	20	United States	Alaska	Soldotna, forest 1.6km southeast of Headquarters Lake, Slikok watershed project site MG34		7/21/2016	2016-07-21	2016-07-21	media	60.44483	-151.04167	10975219		Tracheophyta	Viburnum		Plantae	Viburnum edule	KNWR-2016.01-Slikok-ObsHerb	MG34
http://creativecommons.org/publicdomain/zero/1.0/	KNWRObs:Herb:270	Hylocomium splendens	Hypnales	Hylocomiaceae	Bryopsida			Matt Bowser	20	United States	Alaska	Soldotna, forest 880m southeast of Nordic Lake, Slikok watershed project site SK23		8/3/2016	2016-08-03	2016-08-03	media	60.44095	-151.0694	10975231		Bryophyta	Hylocomium		Plantae	Hylocomium splendens	KNWR-2016.01-Slikok-ObsHerb	SK23
http://creativecommons.org/publicdomain/zero/1.0/	KNWRObs:Herb:271	Linnaea borealis	Dipsacales	Caprifoliaceae	Magnoliopsida			Matt Bowser	20	United States	Alaska	Soldotna, forest 880m southeast of Nordic Lake, Slikok watershed project site SK23		8/3/2016	2016-08-03	2016-08-03	media	60.44095	-151.0694	10975231		Tracheophyta	Linnaea		Plantae	Linnaea borealis	KNWR-2016.01-Slikok-ObsHerb	SK23
http://creativecommons.org/publicdomain/zero/1.0/	KNWRObs:Herb:362	Trientalis europaea	Ericales	Primulaceae	Magnoliopsida			Matt Bowser	20	United States	Alaska	Soldotna, forest 940m southeast of Headquarters Lake, Slikok watershed project site SK17		7/20/2016	2016-07-20	2016-07-20	media	60.44949	-151.05037	10975229		Tracheophyta	Trientalis		Plantae	Trientalis europaea	KNWR-2016.01-Slikok-ObsHerb	SK17
http://creativecommons.org/publicdomain/zero/1.0/	KNWRObs:Herb:369	Picea mariana	Pinales, Coniferales	Pinaceae	Coniferopsida, Pinopsida			Matt Bowser	20	United States	Alaska	Soldotna, forest 610m southweast of Nordic Lake, Slikok watershed project site SK22		8/9/2016	2016-08-09	2016-08-09	media	60.44135	-151.08761	10975230		Tracheophyta	Picea		Plantae	Picea mariana	KNWR-2016.01-Slikok-ObsHerb	SK22
http://creativecommons.org/publicdomain/zero/1.0/	KNWRObs:Herb:370	Pleurozium schreberi	Hypnales	Hylocomiaceae	Bryopsida			Matt Bowser	20	United States	Alaska	Soldotna, forest 610m southweast of Nordic Lake, Slikok watershed project site SK22		8/9/2016	2016-08-09	2016-08-09	media	60.44135	-151.08761	10975230		Bryophyta	Pleurozium		Plantae	Pleurozium schreberi	KNWR-2016.01-Slikok-ObsHerb	SK22
http://creativecommons.org/publicdomain/zero/1.0/	KNWRObs:Herb:280	Rosa acicularis	Rosales	Rosaceae	Magnoliopsida			Matt Bowser	20	United States	Alaska	Soldotna, 40m east of Sterling Highway 480m northeast of intersection with south end of Ski Hill Road, Slikok watershed project site MG10		8/10/2016	2016-08-10	2016-08-10	media	60.45941	-151.09513	10975201		Tracheophyta	Rosa		Plantae	Rosa acicularis	KNWR-2016.01-Slikok-ObsHerb	MG10
http://creativecommons.org/publicdomain/zero/1.0/	KNWRObs:Herb:277	Pleurozium schreberi	Hypnales	Hylocomiaceae	Bryopsida			Matt Bowser	20	United States	Alaska	Soldotna, 40m east of Sterling Highway 480m northeast of intersection with south end of Ski Hill Road, Slikok watershed project site MG10		8/10/2016	2016-08-10	2016-08-10	media	60.45941	-151.09513	10975201		Bryophyta	Pleurozium		Plantae	Pleurozium schreberi	KNWR-2016.01-Slikok-ObsHerb	MG10
http://creativecommons.org/publicdomain/zero/1.0/	KNWRObs:Herb:287	Calamagrostis canadensis	Poales	Poaceae	Liliopsida			Matt Bowser	20	United States	Alaska	Soldotna, forest 600m south-southeast of Headquarters Lake, Slikok watershed project site MG26		7/20/2016	2016-07-20	2016-07-20	media	60.44969	-151.05948	10975212		Tracheophyta	Calamagrostis		Plantae	Calamagrostis canadensis	KNWR-2016.01-Slikok-ObsHerb	MG26
http://creativecommons.org/publicdomain/zero/1.0/	KNWRObs:Herb:298	Linnaea borealis	Dipsacales	Caprifoliaceae	Magnoliopsida			Matt Bowser	20	United States	Alaska	Soldotna, forest 600m south-southeast of Headquarters Lake, Slikok watershed project site MG26		7/20/2016	2016-07-20	2016-07-20	media	60.44969	-151.05948	10975212		Tracheophyta	Linnaea		Plantae	Linnaea borealis	KNWR-2016.01-Slikok-ObsHerb	MG26
http://creativecommons.org/publicdomain/zero/1.0/	KNWRObs:Herb:315	Betula glandulosa	Fagales	Betulaceae	Magnoliopsida			Matt Bowser	20	United States	Alaska	Soldotna, wetland 490m south of Headquarters Lake, Slikok watershed project site SK16		8/3/2016	2016-08-03	2016-08-03	media	60.44989	-151.06859	10975228		Tracheophyta	Betula		Plantae	Betula glandulosa	KNWR-2016.01-Slikok-ObsHerb	SK16
http://creativecommons.org/publicdomain/zero/1.0/	KNWRObs:Herb:329	Drosera rotundifolia	Caryophyllales	Droseraceae	Magnoliopsida			Matt Bowser	20	United States	Alaska	Soldotna, in wetland 400m south-southwest of floatplane dock on Headquarters Lake, Slikok watershed project site MG12		8/1/2016	2016-08-01	2016-08-01	media	60.45902	-151.0769	10975202		Tracheophyta	Drosera		Plantae	Drosera rotundifolia	KNWR-2016.01-Slikok-ObsHerb	MG12
http://creativecommons.org/publicdomain/zero/1.0/	KNWRObs:Herb:335	Rubus chamaemorus	Rosales	Rosaceae	Magnoliopsida			Matt Bowser	20	United States	Alaska	Soldotna, in wetland 400m south-southwest of floatplane dock on Headquarters Lake, Slikok watershed project site MG12		8/1/2016	2016-08-01	2016-08-01	media	60.45902	-151.0769	10975202		Tracheophyta	Rubus		Plantae	Rubus chamaemorus	KNWR-2016.01-Slikok-ObsHerb	MG12
http://creativecommons.org/publicdomain/zero/1.0/	KNWRObs:Herb:350	Ribes triste	Saxifragales	Grossulariaceae	Magnoliopsida			Matt Bowser	20	United States	Alaska	Soldotna, forest between Raven Ridge Trail and Central Peninsula landfill, Slikok watershed project site MG35		7/26/2016	2016-07-26	2016-07-26	media	60.44154	-151.09672	10975220		Tracheophyta	Ribes		Plantae	Ribes triste	KNWR-2016.01-Slikok-ObsHerb	MG35
http://creativecommons.org/publicdomain/zero/1.0/	KNWRObs:Herb:352	Rubus pedatus	Rosales	Rosaceae	Magnoliopsida			Matt Bowser	20	United States	Alaska	Soldotna, forest between Raven Ridge Trail and Central Peninsula landfill, Slikok watershed project site MG35		7/26/2016	2016-07-26	2016-07-26	media	60.44154	-151.09672	10975220		Tracheophyta	Rubus		Plantae	Rubus pedatus	KNWR-2016.01-Slikok-ObsHerb	MG35
http://creativecommons.org/publicdomain/zero/1.0/	KNWRObs:Herb:375	Drosera rotundifolia	Caryophyllales	Droseraceae	Magnoliopsida			Matt Bowser	20	United States	Alaska	Soldotna, muskeg 40m east of Headquarters Lake, Slikok watershed project site MG14		7/18/2016	2016-07-18	2016-07-18	media	60.45862	-151.05868	10975203		Tracheophyta	Drosera		Plantae	Drosera rotundifolia	KNWR-2016.01-Slikok-ObsHerb	MG14
http://creativecommons.org/publicdomain/zero/1.0/	KNWRObs:Herb:450	Trientalis europaea	Ericales	Primulaceae	Magnoliopsida			Matt Bowser	20	United States	Alaska	Soldotna, forest 380m southeast of Arc Lake, Slikok watershed project site MG28		8/9/2016	2016-08-09	2016-08-09	media	60.44601	-151.09632	10975213		Tracheophyta	Trientalis		Plantae	Trientalis europaea	KNWR-2016.01-Slikok-ObsHerb	MG28
http://creativecommons.org/publicdomain/zero/1.0/	KNWRObs:Herb:454	Salix fuscescens	Malpighiales	Salicaceae	Magnoliopsida			Matt Bowser	20	United States	Alaska	Soldotna, muskeg 600m south of Nordic Lake, Slikok watershed project site MG37		8/3/2016	2016-08-03	2016-08-03	media	60.44115	-151.07851	10975221		Tracheophyta	Salix		Plantae	Salix fuscescens	KNWR-2016.01-Slikok-ObsHerb	MG37
http://creativecommons.org/publicdomain/zero/1.0/	KNWRObs:Herb:467	Juncus triglumis	Poales	Juncaceae	Liliopsida			Matt Bowser	20	United States	Alaska	Soldotna, wetland 490m south of Headquarters Lake, Slikok watershed project site SK16		8/3/2016	2016-08-03	2016-08-03	media	60.44989	-151.06859	10975228		Tracheophyta	Juncus		Plantae	Juncus triglumis	KNWR-2016.01-Slikok-ObsHerb	SK16
http://creativecommons.org/licenses/by/3.0/	UAMObs:Ento:238829	Mycetophilidae sp. SlikokOtu500	Diptera	Mycetophilidae	Insecta		(same lot as) KNWR:Ento http://arctos.database.museum/guid/KNWR:Ento:10877	Matt Bowser, Todd Eskelin	12	United States	Alaska	Soldotna, forest between Raven Ridge Trail and Central Peninsula landfill, Slikok watershed project site MG35, east half of plot	50 m2 sweep net sample	6/15/2016	2016-06-15	2016-06-15	media	60.44154	-151.09672	10970670	wild caught	Arthropoda			Animalia		UAM-2019.02-Slikok_Creek_bioinventory-Ento	MG35
http://creativecommons.org/licenses/by/3.0/	UAMObs:Ento:238734	Amauronematus fallax	Hymenoptera	Tenthredinidae	Insecta		(same lot as) KNWR:Ento http://arctos.database.museum/guid/KNWR:Ento:10879	Matt Bowser, Todd Eskelin	12	United States	Alaska	Soldotna, muskeg 600m south of Nordic Lake, Slikok watershed project site MG37, east half of plot	50 m2 sweep net sample	6/15/2016	2016-06-15	2016-06-15	media	60.44115	-151.07851	10970672	wild caught	Arthropoda	Amauronematus		Animalia	Amauronematus fallax	UAM-2019.02-Slikok_Creek_bioinventory-Ento	MG37
http://creativecommons.org/licenses/by/3.0/	UAMObs:Ento:238743	Gelis sp. BOLD:AAA6283	Hymenoptera	Ichneumonidae	Insecta		(same lot as) KNWR:Ento http://arctos.database.museum/guid/KNWR:Ento:10879	Matt Bowser, Todd Eskelin	12	United States	Alaska	Soldotna, muskeg 600m south of Nordic Lake, Slikok watershed project site MG37, east half of plot	50 m2 sweep net sample	6/15/2016	2016-06-15	2016-06-15	media	60.44115	-151.07851	10970672	wild caught	Arthropoda	Gelis		Animalia	Gelis sp. BOLD:AAA6283	UAM-2019.02-Slikok_Creek_bioinventory-Ento	MG37
http://creativecommons.org/licenses/by/3.0/	UAMObs:Ento:238783	Micromus borealis	Neuroptera	Hemerobiidae	Insecta		(same lot as) KNWR:Ento http://arctos.database.museum/guid/KNWR:Ento:10875	Matt Bowser, Dawn Magness	12	United States	Alaska	Soldotna, forest 1.6km southeast of Headquarters Lake, Slikok watershed project site MG34, east half of plot	50 m2 sweep net sample	6/16/2016	2016-06-16	2016-06-16	media	60.44483	-151.04167	10970668	wild caught	Arthropoda	Micromus		Animalia	Micromus borealis	UAM-2019.02-Slikok_Creek_bioinventory-Ento	MG34
http://creativecommons.org/licenses/by/3.0/	UAMObs:Ento:238826	Eupeodes lapponicus	Diptera	Syrphidae	Insecta		(same lot as) KNWR:Ento http://arctos.database.museum/guid/KNWR:Ento:10877	Matt Bowser, Todd Eskelin	12	United States	Alaska	Soldotna, forest between Raven Ridge Trail and Central Peninsula landfill, Slikok watershed project site MG35, east half of plot	50 m2 sweep net sample	6/15/2016	2016-06-15	2016-06-15	media	60.44154	-151.09672	10970670	wild caught	Arthropoda	Eupeodes		Animalia	Eupeodes lapponicus	UAM-2019.02-Slikok_Creek_bioinventory-Ento	MG35
http://creativecommons.org/licenses/by/3.0/	UAMObs:Ento:238754	Aedes abserratus	Diptera	Culicidae	Insecta		(same lot as) KNWR:Ento http://arctos.database.museum/guid/KNWR:Ento:10881	Matt Bowser, Todd Eskelin	12	United States	Alaska	Soldotna, forest 1.5km south of Headquarters Lake, Slikok watershed project site MG39, east half of plot	50 m2 sweep net sample	6/15/2016	2016-06-15	2016-06-15	media	60.44076	-151.06029	10970674	wild caught	Arthropoda	Aedes		Animalia	Aedes abserratus	UAM-2019.02-Slikok_Creek_bioinventory-Ento	MG39
http://creativecommons.org/licenses/by/3.0/	UAMObs:Ento:238760	Carsia sororiata	Lepidoptera	Geometridae	Insecta		(same lot as) KNWR:Ento http://arctos.database.museum/guid/KNWR:Ento:10881	Matt Bowser, Todd Eskelin	12	United States	Alaska	Soldotna, forest 1.5km south of Headquarters Lake, Slikok watershed project site MG39, east half of plot	50 m2 sweep net sample	6/15/2016	2016-06-15	2016-06-15	media	60.44076	-151.06029	10970674	wild caught	Arthropoda	Carsia		Animalia	Carsia sororiata	UAM-2019.02-Slikok_Creek_bioinventory-Ento	MG39
http://creativecommons.org/licenses/by/3.0/	UAMObs:Ento:238761	Cecidomyiidae sp. BOLD:AAQ0659	Diptera	Cecidomyiidae	Insecta		(same lot as) KNWR:Ento http://arctos.database.museum/guid/KNWR:Ento:10881	Matt Bowser, Todd Eskelin	12	United States	Alaska	Soldotna, forest 1.5km south of Headquarters Lake, Slikok watershed project site MG39, east half of plot	50 m2 sweep net sample	6/15/2016	2016-06-15	2016-06-15	media	60.44076	-151.06029	10970674	wild caught	Arthropoda			Animalia	Cecidomyiidae sp. BOLD:AAQ0659	UAM-2019.02-Slikok_Creek_bioinventory-Ento	MG39
http://creativecommons.org/licenses/by/3.0/	UAMObs:Ento:238702	Delphacidae sp. SlikokOtu951	Hemiptera	Delphacidae	Insecta		(same lot as) KNWR:Ento http://arctos.database.museum/guid/KNWR:Ento:10873	Matt Bowser, Dawn Magness	12	United States	Alaska	Soldotna, forest 1.3km southeast of Headquarters Lake, Slikok watershed project site MG33, east half of plot	50 m2 sweep net sample	6/16/2016	2016-06-16	2016-06-16	media	60.44502	-151.05078	10970666	wild caught	Arthropoda			Animalia		UAM-2019.02-Slikok_Creek_bioinventory-Ento	MG33
http://creativecommons.org/licenses/by/3.0/	UAMObs:Ento:238709	Fannia subpellucens	Diptera	Fanniidae	Insecta		(same lot as) KNWR:Ento http://arctos.database.museum/guid/KNWR:Ento:10873	Matt Bowser, Dawn Magness	12	United States	Alaska	Soldotna, forest 1.3km southeast of Headquarters Lake, Slikok watershed project site MG33, east half of plot	50 m2 sweep net sample	6/16/2016	2016-06-16	2016-06-16	media	60.44502	-151.05078	10970666	wild caught	Arthropoda	Fannia		Animalia	Fannia subpellucens	UAM-2019.02-Slikok_Creek_bioinventory-Ento	MG33
http://creativecommons.org/licenses/by/3.0/	UAMObs:Ento:238770	Insecta sp. SlikokOtu1836			Insecta		(same lot as) KNWR:Ento http://arctos.database.museum/guid/KNWR:Ento:10881	Matt Bowser, Todd Eskelin	12	United States	Alaska	Soldotna, forest 1.5km south of Headquarters Lake, Slikok watershed project site MG39, east half of plot	50 m2 sweep net sample	6/15/2016	2016-06-15	2016-06-15	media	60.44076	-151.06029	10970674	wild caught	Arthropoda			Animalia		UAM-2019.02-Slikok_Creek_bioinventory-Ento	MG39
http://creativecommons.org/licenses/by/3.0/	UAMObs:Ento:238713	Megaphthalmoides unilineatus	Diptera	Scathophagidae	Insecta		(same lot as) KNWR:Ento http://arctos.database.museum/guid/KNWR:Ento:10873	Matt Bowser, Dawn Magness	12	United States	Alaska	Soldotna, forest 1.3km southeast of Headquarters Lake, Slikok watershed project site MG33, east half of plot	50 m2 sweep net sample	6/16/2016	2016-06-16	2016-06-16	media	60.44502	-151.05078	10970666	wild caught	Arthropoda	Megaphthalmoides		Animalia	Megaphthalmoides unilineatus	UAM-2019.02-Slikok_Creek_bioinventory-Ento	MG33
http://creativecommons.org/licenses/by/3.0/	UAMObs:Ento:238718	Psilidae sp. BOLD:AAF9705	Diptera	Psilidae	Insecta		(same lot as) KNWR:Ento http://arctos.database.museum/guid/KNWR:Ento:10873	Matt Bowser, Dawn Magness	12	United States	Alaska	Soldotna, forest 1.3km southeast of Headquarters Lake, Slikok watershed project site MG33, east half of plot	50 m2 sweep net sample	6/16/2016	2016-06-16	2016-06-16	media	60.44502	-151.05078	10970666	wild caught	Arthropoda			Animalia	Psilidae sp. BOLD:AAF9705	UAM-2019.02-Slikok_Creek_bioinventory-Ento	MG33
http://creativecommons.org/licenses/by/3.0/	UAMObs:Ento:238720	Sciaridae sp. BOLD:AAH3985	Diptera	Sciaridae	Insecta		(same lot as) KNWR:Ento http://arctos.database.museum/guid/KNWR:Ento:10873	Matt Bowser, Dawn Magness	12	United States	Alaska	Soldotna, forest 1.3km southeast of Headquarters Lake, Slikok watershed project site MG33, east half of plot	50 m2 sweep net sample	6/16/2016	2016-06-16	2016-06-16	media	60.44502	-151.05078	10970666	wild caught	Arthropoda			Animalia	Sciaridae sp. BOLD:AAH3985	UAM-2019.02-Slikok_Creek_bioinventory-Ento	MG33
http://creativecommons.org/licenses/by/3.0/	UAMObs:Ento:238812	Ochlerotatus excrucians	Diptera	Culicidae	Insecta		(same lot as) KNWR:Ento http://arctos.database.museum/guid/KNWR:Ento:10877	Matt Bowser, Todd Eskelin	12	United States	Alaska	Soldotna, forest between Raven Ridge Trail and Central Peninsula landfill, Slikok watershed project site MG35, east half of plot	50 m2 sweep net sample	6/15/2016	2016-06-15	2016-06-15	media	60.44154	-151.09672	10970670	wild caught	Arthropoda	Ochlerotatus		Animalia	Ochlerotatus excrucians	UAM-2019.02-Slikok_Creek_bioinventory-Ento	MG35
http://creativecommons.org/licenses/by/3.0/	UAMObs:Ento:238597	Chironomus sp. BOLD:AAC0594	Diptera	Chironomidae	Insecta		(same lot as) KNWR:Ento http://arctos.database.museum/guid/KNWR:Ento:10869	Matt Bowser, Dawn Magness	12	United States	Alaska	Soldotna, forest 980m south of Headquarters Lake, Slikok watershed project site MG31, east half of plot	50 m2 sweep net sample	6/16/2016	2016-06-16	2016-06-16	media	60.44542	-151.069	10970662	wild caught	Arthropoda	Chironomus		Animalia	Chironomus sp. BOLD:AAC0594	UAM-2019.02-Slikok_Creek_bioinventory-Ento	MG31
http://creativecommons.org/licenses/by/3.0/	UAMObs:Ento:238625	Dikraneura sp. BOLD:AAV0227	Hemiptera	Cicadellidae	Insecta		(same lot as) KNWR:Ento http://arctos.database.museum/guid/KNWR:Ento:10866	Matt Bowser, Dawn Magness	12	United States	Alaska	Soldotna, Ski Hill Road, Centennial Trail north of Headquarters Lake, Slikok watershed project site MG02, east half of plot	50 m2 sweep net sample	6/14/2016	2016-06-14	2016-06-14	media	60.46755	-151.05787	10970655	wild caught	Arthropoda	Dikraneura		Animalia	Dikraneura sp. BOLD:AAV0227	UAM-2019.02-Slikok_Creek_bioinventory-Ento	MG02
http://creativecommons.org/licenses/by/3.0/	UAMObs:Ento:238626	Dikraneura sp. SlikokOtu1559	Hemiptera	Cicadellidae	Insecta		(same lot as) KNWR:Ento http://arctos.database.museum/guid/KNWR:Ento:10866	Matt Bowser, Dawn Magness	12	United States	Alaska	Soldotna, Ski Hill Road, Centennial Trail north of Headquarters Lake, Slikok watershed project site MG02, east half of plot	50 m2 sweep net sample	6/14/2016	2016-06-14	2016-06-14	media	60.46755	-151.05787	10970655	wild caught	Arthropoda	Dikraneura		Animalia		UAM-2019.02-Slikok_Creek_bioinventory-Ento	MG02
http://creativecommons.org/licenses/by/3.0/	UAMObs:Ento:238628	Heleomyzidae sp. SlikokOtu1810	Diptera	Heleomyzidae	Insecta		(same lot as) KNWR:Ento http://arctos.database.museum/guid/KNWR:Ento:10866	Matt Bowser, Dawn Magness	12	United States	Alaska	Soldotna, Ski Hill Road, Centennial Trail north of Headquarters Lake, Slikok watershed project site MG02, east half of plot	50 m2 sweep net sample	6/14/2016	2016-06-14	2016-06-14	media	60.46755	-151.05787	10970655	wild caught	Arthropoda			Animalia		UAM-2019.02-Slikok_Creek_bioinventory-Ento	MG02
http://creativecommons.org/licenses/by/3.0/	UAMObs:Ento:238649	Ephedrus lacertosus	Hymenoptera	Braconidae	Insecta		(same lot as) KNWR:Ento http://arctos.database.museum/guid/KNWR:Ento:10867	Matt Bowser, Dawn Magness	12	United States	Alaska	Soldotna, forest 180m south-southeast of Nordic Lake, Slikok watershed project site MG30, east half of plot	50 m2 sweep net sample	6/16/2016	2016-06-16	2016-06-16	media	60.44562	-151.0781	10970660	wild caught	Arthropoda	Ephedrus		Animalia	Ephedrus lacertosus	UAM-2019.02-Slikok_Creek_bioinventory-Ento	MG30
http://creativecommons.org/licenses/by/3.0/	UAMObs:Ento:238653	Misumena vatia	Araneae	Thomisidae	Arachnida		(same lot as) KNWR:Ento http://arctos.database.museum/guid/KNWR:Ento:10867	Matt Bowser, Dawn Magness	12	United States	Alaska	Soldotna, forest 180m south-southeast of Nordic Lake, Slikok watershed project site MG30, east half of plot	50 m2 sweep net sample	6/16/2016	2016-06-16	2016-06-16	media	60.44562	-151.0781	10970660	wild caught	Arthropoda	Misumena		Animalia	Misumena vatia	UAM-2019.02-Slikok_Creek_bioinventory-Ento	MG30
http://creativecommons.org/licenses/by/3.0/	UAMObs:Ento:238609	Balclutha sp. SlikokOtu2029	Hemiptera	Cicadellidae	Insecta		(same lot as) KNWR:Ento http://arctos.database.museum/guid/KNWR:Ento:10871	Matt Bowser, Dawn Magness	12	United States	Alaska	Soldotna, forest 1km south of Headquarters Lake, Slikok watershed project site MG32, east half of plot	50 m2 sweep net sample	6/16/2016	2016-06-16	2016-06-16	media	60.44522	-151.05989	10970664	wild caught	Arthropoda	Balclutha		Animalia		UAM-2019.02-Slikok_Creek_bioinventory-Ento	MG32
http://creativecommons.org/licenses/by/3.0/	UAMObs:Ento:238600	Hybotidae sp. BOLD:ACX4896	Diptera	Hybotidae	Insecta		(same lot as) KNWR:Ento http://arctos.database.museum/guid/KNWR:Ento:10869	Matt Bowser, Dawn Magness	12	United States	Alaska	Soldotna, forest 980m south of Headquarters Lake, Slikok watershed project site MG31, east half of plot	50 m2 sweep net sample	6/16/2016	2016-06-16	2016-06-16	media	60.44542	-151.069	10970662	wild caught	Arthropoda			Animalia	Hybotidae sp. BOLD:ACX4896	UAM-2019.02-Slikok_Creek_bioinventory-Ento	MG31
http://creativecommons.org/licenses/by/3.0/	UAMObs:Ento:238602	Macrosiphum euphorbiae	Hemiptera	Aphididae	Insecta		(same lot as) KNWR:Ento http://arctos.database.museum/guid/KNWR:Ento:10869	Matt Bowser, Dawn Magness	12	United States	Alaska	Soldotna, forest 980m south of Headquarters Lake, Slikok watershed project site MG31, east half of plot	50 m2 sweep net sample	6/16/2016	2016-06-16	2016-06-16	media	60.44542	-151.069	10970662	wild caught	Arthropoda	Macrosiphum		Animalia	Macrosiphum euphorbiae	UAM-2019.02-Slikok_Creek_bioinventory-Ento	MG31
http://creativecommons.org/licenses/by/3.0/	UAMObs:Ento:238882	Dichelotarsus laevicollis	Coleoptera	Cantharidae	Insecta		(same lot as) KNWR:Ento http://arctos.database.museum/guid/KNWR:Ento:10893	Matt Bowser, Todd Eskelin	12	United States	Alaska	Soldotna, forest 880m southeast of Nordic Lake, Slikok watershed project site SK23, east half of plot	50 m2 sweep net sample	6/15/2016	2016-06-15	2016-06-15	media	60.44095	-151.0694	10970686	wild caught	Arthropoda	Dichelotarsus		Animalia	Dichelotarsus laevicollis	UAM-2019.02-Slikok_Creek_bioinventory-Ento	SK23
http://creativecommons.org/licenses/by/3.0/	UAMObs:Ento:238890	Micromus borealis	Neuroptera	Hemerobiidae	Insecta		(same lot as) KNWR:Ento http://arctos.database.museum/guid/KNWR:Ento:10893	Matt Bowser, Todd Eskelin	12	United States	Alaska	Soldotna, forest 880m southeast of Nordic Lake, Slikok watershed project site SK23, east half of plot	50 m2 sweep net sample	6/15/2016	2016-06-15	2016-06-15	media	60.44095	-151.0694	10970686	wild caught	Arthropoda	Micromus		Animalia	Micromus borealis	UAM-2019.02-Slikok_Creek_bioinventory-Ento	SK23
http://creativecommons.org/licenses/by/3.0/	UAMObs:Ento:238837	Thamnotettix confinis	Hemiptera	Cicadellidae	Insecta		(same lot as) KNWR:Ento http://arctos.database.museum/guid/KNWR:Ento:10877	Matt Bowser, Todd Eskelin	12	United States	Alaska	Soldotna, forest between Raven Ridge Trail and Central Peninsula landfill, Slikok watershed project site MG35, east half of plot	50 m2 sweep net sample	6/15/2016	2016-06-15	2016-06-15	media	60.44154	-151.09672	10970670	wild caught	Arthropoda	Thamnotettix		Animalia	Thamnotettix confinis	UAM-2019.02-Slikok_Creek_bioinventory-Ento	MG35
http://creativecommons.org/licenses/by/3.0/	UAMObs:Ento:238854	Hybotidae sp. BOLD:ACX4896	Diptera	Hybotidae	Insecta		(same lot as) KNWR:Ento http://arctos.database.museum/guid/KNWR:Ento:10889	Rebekah Brassfield, Dawn Magness	12	United States	Alaska	Soldotna, forest 940m southeast of Headquarters Lake, Slikok watershed project site SK17, east half of plot	50 m2 sweep net sample	6/15/2016	2016-06-15	2016-06-15	media	60.44949	-151.05037	10970682	wild caught	Arthropoda			Animalia	Hybotidae sp. BOLD:ACX4896	UAM-2019.02-Slikok_Creek_bioinventory-Ento	SK17
http://creativecommons.org/licenses/by/3.0/	UAMObs:Ento:239862	Macrocera sp. BOLD:AAP6490	Diptera	Keroplatidae	Insecta		(same lot as) KNWR:Ento http://arctos.database.museum/guid/KNWR:Ento:10972	Mariah McInnis, Matt Bowser	12	United States	Alaska	Soldotna, forest 610m southweast of Nordic Lake, Slikok watershed project site SK22, east half of plot	50 m2 sweep net sample	8/9/2016	2016-08-09	2016-08-09	media	60.44135	-151.08761	10977486	wild caught	Arthropoda	Macrocera		Animalia	Macrocera sp. BOLD:AAP6490	UAM-2019.02-Slikok_Creek_bioinventory-Ento	SK22
http://creativecommons.org/licenses/by/3.0/	UAMObs:Ento:239873	Tetragoneura sp. BOLD:ACB7566	Diptera	Mycetophilidae	Insecta		(same lot as) KNWR:Ento http://arctos.database.museum/guid/KNWR:Ento:10948	Matt Bowser	12	United States	Alaska	Soldotna, Ski Hill Road, Centennial Trail north of Headquarters Lake, Slikok watershed project site MG02, east half of plot	50 m2 sweep net sample	7/19/2016	2016-07-19	2016-07-19	media	60.46755	-151.05787	10977462	wild caught	Arthropoda	Tetragoneura		Animalia	Tetragoneura sp. BOLD:ACB7566	UAM-2019.02-Slikok_Creek_bioinventory-Ento	MG02
http://creativecommons.org/licenses/by/3.0/	UAMObs:Ento:239874	Typhlocybinae sp. BOLD:ACC2894	Hemiptera	Cicadellidae	Insecta		(same lot as) KNWR:Ento http://arctos.database.museum/guid/KNWR:Ento:10948	Matt Bowser	12	United States	Alaska	Soldotna, Ski Hill Road, Centennial Trail north of Headquarters Lake, Slikok watershed project site MG02, east half of plot	50 m2 sweep net sample	7/19/2016	2016-07-19	2016-07-19	media	60.46755	-151.05787	10977462	wild caught	Arthropoda			Animalia	Typhlocybinae sp. BOLD:ACC2894	UAM-2019.02-Slikok_Creek_bioinventory-Ento	MG02
http://creativecommons.org/licenses/by/3.0/	UAMObs:Ento:239883	Mughiphantes sp. 1GAB	Araneae	Linyphiidae	Arachnida		(same lot as) KNWR:Ento http://arctos.database.museum/guid/KNWR:Ento:10966	Mariah McInnis, Matt Bowser	12	United States	Alaska	Soldotna, Ski Hill Road, Nordic View Trail by Nordic Lake, Slikok watershed project site SK15, east half of plot	50 m2 sweep net sample	8/9/2016	2016-08-09	2016-08-09	media	60.45028	-151.08681	10977480	wild caught	Arthropoda	Mughiphantes		Animalia		UAM-2019.02-Slikok_Creek_bioinventory-Ento	SK15
http://creativecommons.org/licenses/by/3.0/	UAMObs:Ento:239898	Zoogenetes harpa	Pulmonata	Valloniidae	Gastropoda		(same lot as) KNWR:Ento http://arctos.database.museum/guid/KNWR:Ento:10948	Matt Bowser	12	United States	Alaska	Soldotna, Ski Hill Road, Centennial Trail north of Headquarters Lake, Slikok watershed project site MG02, east half of plot	50 m2 sweep net sample	7/19/2016	2016-07-19	2016-07-19	media	60.46755	-151.05787	10977462	wild caught	Mollusca	Zoogenetes		Animalia	Zoogenetes harpa	UAM-2019.02-Slikok_Creek_bioinventory-Ento	MG02
http://creativecommons.org/licenses/by/3.0/	UAMObs:Ento:239900	Cacopsylla myrtilli	Hemiptera	Psyllidae	Insecta		(same lot as) KNWR:Ento http://arctos.database.museum/guid/KNWR:Ento:10950	Joel Stone, Mariah McInnis, Matt Bowser	12	United States	Alaska	Soldotna, forest 1.6km southeast of Headquarters Lake, Slikok watershed project site MG34, east half of plot	50 m2 sweep net sample	7/21/2016	2016-07-21	2016-07-21	media	60.44483	-151.04167	10977464	wild caught	Arthropoda	Cacopsylla		Animalia	Cacopsylla myrtilli	UAM-2019.02-Slikok_Creek_bioinventory-Ento	MG34
http://creativecommons.org/licenses/by/3.0/	UAMObs:Ento:239901	Caloptilia suberinella	Lepidoptera	Gracillariidae	Insecta		(same lot as) KNWR:Ento http://arctos.database.museum/guid/KNWR:Ento:10950	Joel Stone, Mariah McInnis, Matt Bowser	12	United States	Alaska	Soldotna, forest 1.6km southeast of Headquarters Lake, Slikok watershed project site MG34, east half of plot	50 m2 sweep net sample	7/21/2016	2016-07-21	2016-07-21	media	60.44483	-151.04167	10977464	wild caught	Arthropoda	Caloptilia		Animalia	Caloptilia suberinella	UAM-2019.02-Slikok_Creek_bioinventory-Ento	MG34
http://creativecommons.org/licenses/by/3.0/	UAMObs:Ento:238945	Dysstroma citrata	Lepidoptera	Geometridae	Insecta		(same lot as) KNWR:Ento http://arctos.database.museum/guid/KNWR:Ento:10885	Joel Stone, Dawn Magness	12	United States	Alaska	Soldotna, Ski Hill Road, Nordic View Trail by Nordic Lake, Slikok watershed project site SK15, east half of plot	50 m2 sweep net sample	6/17/2016	2016-06-17	2016-06-17	media	60.45028	-151.08681	10970678	wild caught	Arthropoda	Dysstroma		Animalia	Dysstroma citrata	UAM-2019.02-Slikok_Creek_bioinventory-Ento	SK15
http://creativecommons.org/licenses/by/3.0/	UAMObs:Ento:238950	Eupeodes lapponicus	Diptera	Syrphidae	Insecta		(same lot as) KNWR:Ento http://arctos.database.museum/guid/KNWR:Ento:10885	Joel Stone, Dawn Magness	12	United States	Alaska	Soldotna, Ski Hill Road, Nordic View Trail by Nordic Lake, Slikok watershed project site SK15, east half of plot	50 m2 sweep net sample	6/17/2016	2016-06-17	2016-06-17	media	60.45028	-151.08681	10970678	wild caught	Arthropoda	Eupeodes		Animalia	Eupeodes lapponicus	UAM-2019.02-Slikok_Creek_bioinventory-Ento	SK15
http://creativecommons.org/licenses/by/3.0/	UAMObs:Ento:238956	Pherbellia albocostata	Diptera	Sciomyzidae	Insecta		(same lot as) KNWR:Ento http://arctos.database.museum/guid/KNWR:Ento:10885	Joel Stone, Dawn Magness	12	United States	Alaska	Soldotna, Ski Hill Road, Nordic View Trail by Nordic Lake, Slikok watershed project site SK15, east half of plot	50 m2 sweep net sample	6/17/2016	2016-06-17	2016-06-17	media	60.45028	-151.08681	10970678	wild caught	Arthropoda	Pherbellia		Animalia	Pherbellia albocostata	UAM-2019.02-Slikok_Creek_bioinventory-Ento	SK15
http://creativecommons.org/licenses/by/3.0/	UAMObs:Ento:238958	Thamnotettix confinis	Hemiptera	Cicadellidae	Insecta		(same lot as) KNWR:Ento http://arctos.database.museum/guid/KNWR:Ento:10885	Joel Stone, Dawn Magness	12	United States	Alaska	Soldotna, Ski Hill Road, Nordic View Trail by Nordic Lake, Slikok watershed project site SK15, east half of plot	50 m2 sweep net sample	6/17/2016	2016-06-17	2016-06-17	media	60.45028	-151.08681	10970678	wild caught	Arthropoda	Thamnotettix		Animalia	Thamnotettix confinis	UAM-2019.02-Slikok_Creek_bioinventory-Ento	SK15
http://creativecommons.org/licenses/by/3.0/	UAMObs:Ento:238963	Cecidomyiidae sp. SlikokOtu196	Diptera	Cecidomyiidae	Insecta		(same lot as) KNWR:Ento http://arctos.database.museum/guid/KNWR:Ento:10887	Rebekah Brassfield, Todd Eskelin	12	United States	Alaska	Soldotna, wetland 490m south of Headquarters Lake, Slikok watershed project site SK16, east half of plot	50 m2 sweep net sample	6/16/2016	2016-06-16	2016-06-16	media	60.44989	-151.06859	10970680	wild caught	Arthropoda			Animalia		UAM-2019.02-Slikok_Creek_bioinventory-Ento	SK16
http://creativecommons.org/licenses/by/3.0/	UAMObs:Ento:239926	Phora carlina	Diptera	Phoridae	Insecta		(same lot as) KNWR:Ento http://arctos.database.museum/guid/KNWR:Ento:10950	Joel Stone, Mariah McInnis, Matt Bowser	12	United States	Alaska	Soldotna, forest 1.6km southeast of Headquarters Lake, Slikok watershed project site MG34, east half of plot	50 m2 sweep net sample	7/21/2016	2016-07-21	2016-07-21	media	60.44483	-151.04167	10977464	wild caught	Arthropoda	Phora		Animalia	Phora carlina	UAM-2019.02-Slikok_Creek_bioinventory-Ento	MG34
http://creativecommons.org/licenses/by/3.0/	UAMObs:Ento:240057	Mecomma gilvipes	Hemiptera	Miridae	Insecta		(same lot as) KNWR:Ento http://arctos.database.museum/guid/KNWR:Ento:10952	Mariah McInnis, Matt Bowser	12	United States	Alaska	Soldotna, forest between Raven Ridge Trail and Central Peninsula landfill, Slikok watershed project site MG35, east half of plot	50 m2 sweep net sample	7/26/2016	2016-07-26	2016-07-26	media	60.44154	-151.09672	10977466	wild caught	Arthropoda	Mecomma		Animalia	Mecomma gilvipes	UAM-2019.02-Slikok_Creek_bioinventory-Ento	MG35
http://creativecommons.org/licenses/by/3.0/	UAMObs:Ento:240066	Zoogenetes harpa	Pulmonata	Valloniidae	Gastropoda		(same lot as) KNWR:Ento http://arctos.database.museum/guid/KNWR:Ento:10962	Matt Bowser	12	United States	Alaska	Soldotna, Ski Hill Road, forest 840m northeast of Headquarters Lake, Slikok watershed project site SK04, east half of plot	50 m2 sweep net sample	7/19/2016	2016-07-19	2016-07-19	media	60.46735	-151.04875	10977476	wild caught	Mollusca	Zoogenetes		Animalia	Zoogenetes harpa	UAM-2019.02-Slikok_Creek_bioinventory-Ento	SK04
http://creativecommons.org/licenses/by/3.0/	UAMObs:Ento:239000	Bolitophilidae sp. BOLD:ACY4787	Diptera	Bolitophilidae	Insecta		(same lot as) KNWR:Ento http://arctos.database.museum/guid/KNWR:Ento:10897	Matt Bowser, Dawn Magness	12	United States	Alaska	Soldotna, Ski Hill Road, off of Centennial Trail 480m northeast of Kenai National Wildlife Refuge headquarters building, Slikok watershed project site SK03, east half of plot	50 m2 sweep net sample	6/14/2016	2016-06-14	2016-06-14	media	60.46775	-151.06698	10970690	wild caught	Arthropoda			Animalia	Bolitophilidae sp. BOLD:ACY4787	UAM-2019.02-Slikok_Creek_bioinventory-Ento	SK03
http://creativecommons.org/licenses/by/3.0/	UAMObs:Ento:239033	Constempellina brevicosta	Diptera	Chironomidae	Insecta		(same lot as) KNWR:Ento http://arctos.database.museum/guid/KNWR:Ento:10895	Matt Bowser, Todd Eskelin	12	United States	Alaska	Soldotna, stream 1.7km south-southeast of Headquarters Lake, Slikok watershed project site SK24, east half of plot	50 m2 sweep net sample	6/15/2016	2016-06-15	2016-06-15	media	60.44056	-151.05118	10970688	wild caught	Arthropoda	Constempellina		Animalia	Constempellina brevicosta	UAM-2019.02-Slikok_Creek_bioinventory-Ento	SK24
http://creativecommons.org/licenses/by/3.0/	UAMObs:Ento:239037	Fannia brooksi	Diptera	Fanniidae	Insecta		(same lot as) KNWR:Ento http://arctos.database.museum/guid/KNWR:Ento:10895	Matt Bowser, Todd Eskelin	12	United States	Alaska	Soldotna, stream 1.7km south-southeast of Headquarters Lake, Slikok watershed project site SK24, east half of plot	50 m2 sweep net sample	6/15/2016	2016-06-15	2016-06-15	media	60.44056	-151.05118	10970688	wild caught	Arthropoda	Fannia		Animalia	Fannia brooksi	UAM-2019.02-Slikok_Creek_bioinventory-Ento	SK24
http://creativecommons.org/licenses/by/3.0/	UAMObs:Ento:239045	Lauxania shewelli	Diptera	Lauxaniidae	Insecta		(same lot as) KNWR:Ento http://arctos.database.museum/guid/KNWR:Ento:10895	Matt Bowser, Todd Eskelin	12	United States	Alaska	Soldotna, stream 1.7km south-southeast of Headquarters Lake, Slikok watershed project site SK24, east half of plot	50 m2 sweep net sample	6/15/2016	2016-06-15	2016-06-15	media	60.44056	-151.05118	10970688	wild caught	Arthropoda	Lauxania		Animalia	Lauxania shewelli	UAM-2019.02-Slikok_Creek_bioinventory-Ento	SK24
http://creativecommons.org/publicdomain/zero/1.0/	KNWRObs:Herb:487	Geocaulon lividum	Santalales	Santalaceae	Magnoliopsida			Matt Bowser	20	United States	Alaska	Soldotna, 210m east-southeast of intersection of Sterling Highway and south end of Ski Hill Road, Slikok watershed project site MG16		8/9/2016	2016-08-09	2016-08-09	media	60.45494	-151.09552	10975204		Tracheophyta	Geocaulon		Plantae	Geocaulon lividum	KNWR-2016.01-Slikok-ObsHerb	MG16
http://creativecommons.org/publicdomain/zero/1.0/	KNWRObs:Herb:489	Linnaea borealis	Dipsacales	Caprifoliaceae	Magnoliopsida			Matt Bowser	20	United States	Alaska	Soldotna, 210m east-southeast of intersection of Sterling Highway and south end of Ski Hill Road, Slikok watershed project site MG16		8/9/2016	2016-08-09	2016-08-09	media	60.45494	-151.09552	10975204		Tracheophyta	Linnaea		Plantae	Linnaea borealis	KNWR-2016.01-Slikok-ObsHerb	MG16
http://creativecommons.org/publicdomain/zero/1.0/	KNWRObs:Herb:501	Lycopodium annotinum	Lycopodiales	Lycopodiaceae	Lycopodiopsida			Matt Bowser	20	United States	Alaska	Soldotna, forest 180m southwest of Nordic Lake, Slikok watershed project site MG29		8/9/2016	2016-08-09	2016-08-09	media	60.44581	-151.08721	10975214		Tracheophyta	Lycopodium		Plantae	Lycopodium annotinum	KNWR-2016.01-Slikok-ObsHerb	MG29
http://creativecommons.org/publicdomain/zero/1.0/	KNWRObs:Herb:401	Linnaea borealis	Dipsacales	Caprifoliaceae	Magnoliopsida			Matt Bowser	20	United States	Alaska	Soldotna, forest 380m southeast of Arc Lake, Slikok watershed project site MG28		8/9/2016	2016-08-09	2016-08-09	media	60.44601	-151.09632	10975213		Tracheophyta	Linnaea		Plantae	Linnaea borealis	KNWR-2016.01-Slikok-ObsHerb	MG28
http://creativecommons.org/publicdomain/zero/1.0/	KNWRObs:Herb:406	Platanthera dilatata	Asparagales	Orchidaceae	Liliopsida			Matt Bowser	20	United States	Alaska	Soldotna, muskeg 600m south of Nordic Lake, Slikok watershed project site MG37		8/3/2016	2016-08-03	2016-08-03	media	60.44115	-151.07851	10975221		Tracheophyta	Platanthera		Plantae	Platanthera dilatata	KNWR-2016.01-Slikok-ObsHerb	MG37
http://creativecommons.org/publicdomain/zero/1.0/	KNWRObs:Herb:422	Pyrola asarifolia	Ericales	Ericaceae	Magnoliopsida			Matt Bowser	20	United States	Alaska	Soldotna, forest 880m southeast of Nordic Lake, Slikok watershed project site SK23		8/3/2016	2016-08-03	2016-08-03	media	60.44095	-151.0694	10975231		Tracheophyta	Pyrola		Plantae	Pyrola asarifolia	KNWR-2016.01-Slikok-ObsHerb	SK23
http://creativecommons.org/publicdomain/zero/1.0/	KNWRObs:Herb:425	Sorbus scopulina	Rosales	Rosaceae	Magnoliopsida			Matt Bowser	20	United States	Alaska	Soldotna, forest 880m southeast of Nordic Lake, Slikok watershed project site SK23		8/3/2016	2016-08-03	2016-08-03	media	60.44095	-151.0694	10975231		Tracheophyta	Sorbus		Plantae	Sorbus scopulina	KNWR-2016.01-Slikok-ObsHerb	SK23
http://creativecommons.org/publicdomain/zero/1.0/	KNWRObs:Herb:436	Spiranthes romanzoffiana	Asparagales	Orchidaceae	Liliopsida			Matt Bowser	20	United States	Alaska	Soldotna, muskeg 40m east of Headquarters Lake, Slikok watershed project site MG14		7/18/2016	2016-07-18	2016-07-18	media	60.45862	-151.05868	10975203		Tracheophyta	Spiranthes		Plantae	Spiranthes romanzoffiana	KNWR-2016.01-Slikok-ObsHerb	MG14
[truncated: 3,097 more rows]
